# Supplementary material for: A spatial and projection-based transcriptomic atlas of paraventricular hypothalamic cell types
Source: Research Square preprint supplement (doi:10.21203/rs.3.rs-7895391/v1), 2025-10-21
Supplement: Supplementary file 1 [file 709036326fbb64f7efed0e64.xlsx]

## Sheet: Table 1
sc/snRNA-seq: All Cell marker genes
gene	p_val	avg_log2FC	pct.1	pct.2	p_val_adj	cluster
Snhg11	0	5.324928171661007	0.994	0.107	0	Neuron
Snap25	0	4.0891	0.923	0.089	0	Neuron
Syt1	0	4.979754751626508	0.885	0.054	0	Neuron
Ahi1	0	3.976484974923287	0.968	0.157	0	Neuron
Meg3	0	5.13429	0.995	0.19	0	Neuron
Celf4	0	4.138728324995495	0.868	0.079	0	Neuron
Cntnap2	0	4.670406742459083	0.84	0.062	0	Neuron
Ube3a	0	3.629571867474393	0.908	0.17	0	Neuron
Peg3	0	3.069470008572922	0.86	0.137	0	Neuron
Ttc3	0	3.2763390369270464	0.954	0.243	0	Neuron
Rian	0	4.728449826749908	0.737	0.042	0	Neuron
Scn2a	0	3.8150284405492387	0.75	0.06	0	Neuron
Atp1a3	0	4.584684552530192	0.72	0.035	0	Neuron
Nrg3	0	3.5542338184227695	0.773	0.089	0	Neuron
Tmem130	0	4.767200118388182	0.703	0.037	0	Neuron
Map1b	0	2.7334861268556105	0.853	0.188	0	Neuron
Snhg14	0	4.187682785636366	0.725	0.061	0	Neuron
Myt1l	0	3.7956856343237177	0.721	0.058	0	Neuron
Tenm2	0	3.897055337682952	0.737	0.08	0	Neuron
Rab3c	0	3.967239918543404	0.713	0.059	0	Neuron
Rasgrf1	0	3.164162716292849	0.76	0.107	0	Neuron
A230006K03Rik	0	5.26485	0.673	0.023	0	Neuron
Usp29	0	3.9235660440634836	0.7	0.057	0	Neuron
Pclo	0	2.759632981346133	0.776	0.142	0	Neuron
Gprasp1	0	2.778105215380931	0.797	0.166	0	Neuron
Pak3	0	3.0839103596582276	0.712	0.088	0	Neuron
Kcnip4	0	4.142379099357565	0.733	0.11	0	Neuron
Fam155a	0	2.6277180190290608	0.72	0.106	0	Neuron
Lingo2	0	4.701301413199142	0.655	0.041	0	Neuron
Rtn1	0	3.0685664932022316	0.783	0.176	0	Neuron
Dlg2	0	2.395376629919891	0.768	0.162	0	Neuron
Cadps	0	2.7325156472791017	0.704	0.105	0	Neuron
Unc80	0	2.951324283781905	0.698	0.101	0	Neuron
Atp1b1	0	4.252373087521124	0.689	0.096	0	Neuron
Gabrb3	0	3.25725	0.668	0.077	0	Neuron
Gria4	0	2.0744704114768338	0.763	0.175	0	Neuron
Dpp6	0	2.480297226216191	0.759	0.171	0	Neuron
Gria2	0	1.4205009646052087	0.931	0.349	0	Neuron
Grm5	0	2.6177313851501003	0.686	0.105	0	Neuron
Matk	0	4.216280392074399	0.607	0.036	0	Neuron
Zcchc18	0	2.4696700471012694	0.752	0.181	0	Neuron
Stmn2	0	4.50383	0.615	0.047	0	Neuron
Tro	0	3.6776357399246367	0.616	0.048	0	Neuron
Ndrg4	0	4.242803416686797	0.608	0.041	0	Neuron
Rims1	0	2.795911608146225	0.651	0.085	0	Neuron
Gprasp2	0	3.434101630905684	0.643	0.078	0	Neuron
Grin1	0	4.066513723058436	0.602	0.039	0	Neuron
Kif5c	0	3.4265726996922137	0.623	0.06	0	Neuron
Ly6h	0	2.813844415539383	0.689	0.129	0	Neuron
Gm26871	0	4.246198139083569	0.602	0.043	0	Neuron
Gap43	0	3.9993113774278335	0.63	0.075	0	Neuron
Lrrtm4	0	2.3391582103864916	0.665	0.112	0	Neuron
Ppfia2	0	2.751940298349407	0.638	0.085	0	Neuron
Stxbp1	0	3.5677956933240846	0.604	0.051	0	Neuron
Scg5	0	2.616997670947555	0.675	0.125	0	Neuron
Camta1	0	2.4852896347890514	0.711	0.161	0	Neuron
Eno2	0	4.111226061969456	0.592	0.042	0	Neuron
Resp18	0	4.793570893852498	0.589	0.039	0	Neuron
Hap1	0	3.214722640308193	0.623	0.075	0	Neuron
Tenm1	0	3.206181148171395	0.614	0.067	0	Neuron
Camk2b	0	4.261386959491073	0.575	0.03	0	Neuron
Zwint	0	3.7734042878439413	0.633	0.09	0	Neuron
Zranb2	0	1.9846343921023308	0.85	0.307	0	Neuron
Map7d2	0	2.566381043284692	0.667	0.125	0	Neuron
Grin2b	0	3.801614854023759	0.597	0.055	0	Neuron
Nsf	0	2.567140079699212	0.681	0.14	0	Neuron
Tcaf1	0	2.1131711341030854	0.711	0.171	0	Neuron
Vsnl1	0	4.127427835323785	0.578	0.038	0	Neuron
Scg2	0	4.964466868820342	0.579	0.04	0	Neuron
Srrm3	0	3.4284074490115923	0.587	0.048	0	Neuron
Epha5	0	3.0482843115070795	0.612	0.076	0	Neuron
Uchl1	0	3.6726708517174327	0.628	0.093	0	Neuron
A230057D06Rik	0	2.950513972804177	0.639	0.105	0	Neuron
C230004F18Rik	0	3.0222517145190344	0.635	0.102	0	Neuron
Cntn5	0	4.876462498095383	0.56	0.027	0	Neuron
Ralyl	0	2.1281236670365855	0.713	0.183	0	Neuron
Pacsin1	0	3.953905094854589	0.565	0.036	0	Neuron
Snap91	0	2.9476890792069304	0.596	0.067	0	Neuron
Impact	0	3.407483995383154	0.618	0.09	0	Neuron
Grm7	0	2.722180047895197	0.628	0.101	0	Neuron
Snrpn	0	3.175382935213831	0.63	0.104	0	Neuron
Syp	0	4.260671881476972	0.558	0.032	0	Neuron
Erc2	0	3.434210595307589	0.582	0.056	0	Neuron
Gabrg2	0	4.923257439670969	0.545	0.02	0	Neuron
Stmn3	0	3.6173198730337814	0.594	0.069	0	Neuron
Pam	0	2.722227777103212	0.645	0.121	0	Neuron
Tmx4	0	3.1170887036130086	0.618	0.094	0	Neuron
Ptprn2	0	2.8404301750962335	0.634	0.112	0	Neuron
Ank3	0	1.2363447305630526	0.821	0.304	0	Neuron
Rgs17	0	3.622230338665726	0.555	0.04	0	Neuron
5330434G04Rik	0	3.2198948578154125	0.583	0.068	0	Neuron
Rit2	0	2.7899941082820634	0.601	0.089	0	Neuron
Rbfox1	0	3.1323491449028955	0.592	0.081	0	Neuron
Scn1a	0	3.4835639852061817	0.553	0.045	0	Neuron
Mycbp2	0	1.6400393035199017	0.87	0.363	0	Neuron
Car10	0	3.862100177500966	0.552	0.046	0	Neuron
Lrrc7	0	2.376943668421542	0.645	0.139	0	Neuron
Dync1i1	0	3.1760874591023494	0.565	0.06	0	Neuron
Ncoa7	0	2.5786650119365775	0.597	0.094	0	Neuron
Nsg2	0	3.548017805745574	0.563	0.061	0	Neuron
Nap1l5	0	3.5462553452792127	0.667	0.167	0	Neuron
Lrfn5	0	3.546374410011585	0.552	0.053	0	Neuron
Scn3a	0	3.102980497706025	0.55	0.052	0	Neuron
Gabra2	0	2.5172557071190917	0.594	0.097	0	Neuron
A330076H08Rik	0	3.113417207620959	0.582	0.087	0	Neuron
Kif5a	0	2.7240767627573184	0.566	0.073	0	Neuron
Cdh18	0	3.982674371523062	0.539	0.047	0	Neuron
Nptn	0	1.8942448994072536	0.68	0.188	0	Neuron
Spock3	0	2.4039402547434015	0.581	0.091	0	Neuron
Grb10	0	4.1322009762112915	0.516	0.029	0	Neuron
Kif21a	0	1.3091009895374819	0.808	0.325	0	Neuron
Podxl2	0	3.7311080467940707	0.51	0.034	0	Neuron
Ptprn	0	3.2291913873120173	0.523	0.048	0	Neuron
2900011O08Rik	0	2.788598486725611	0.558	0.084	0	Neuron
Camk2a	0	3.9271224837881515	0.504	0.031	0	Neuron
Arfgef3	0	3.4170887290577863	0.516	0.045	0	Neuron
Sgip1	0	1.760480885501805	0.632	0.161	0	Neuron
Sgcz	0	2.8561515205521744	0.556	0.086	0	Neuron
Gaa	0	2.980300740841972	0.559	0.09	0	Neuron
Baiap3	0	4.781511444911524	0.489	0.02	0	Neuron
Ctnna2	0	1.5487576045845308	0.736	0.267	0	Neuron
Prkar1b	0	3.9284100488399813	0.5	0.032	0	Neuron
Gnl3l	0	2.892973754849849	0.548	0.081	0	Neuron
Nrg1	0	3.527893412853157	0.571	0.105	0	Neuron
Anks1b	0	0.7040515402109144	0.757	0.292	0	Neuron
Gng2	0	3.28286	0.508	0.043	0	Neuron
Myo5a	0	1.7636308800469072	0.608	0.144	0	Neuron
Sntg1	0	1.8502917199668731	0.567	0.103	0	Neuron
Flywch1	0	2.3264409495250136	0.582	0.119	0	Neuron
Xkr4	0	2.2820567232336573	0.565	0.102	0	Neuron
Elavl4	0	2.8064285743759534	0.516	0.057	0	Neuron
Hook1	0	4.065	0.493	0.034	0	Neuron
Atp6v1b2	0	2.5844860795232023	0.548	0.09	0	Neuron
Gnas	0	1.8390208907993468	0.906	0.448	0	Neuron
Atp6v0a1	0	1.5426179520159633	0.668	0.212	0	Neuron
Opcml	0	0.990177	0.63	0.174	0	Neuron
Elavl2	0	4.269291507759748	0.48	0.025	0	Neuron
Dzank1	0	2.4939017329426285	0.534	0.08	0	Neuron
Gpr158	0	2.9223749836291137	0.521	0.069	0	Neuron
Zcchc12	0	3.935513072923926	0.495	0.043	0	Neuron
Gabrb1	0	0.5170274662148553	0.84	0.388	0	Neuron
B230209E15Rik	0	3.6590223430353177	0.489	0.038	0	Neuron
Ftx	0	3.166730585055666	0.511	0.062	0	Neuron
Bend6	0	3.7370503269070476	0.48	0.031	0	Neuron
Galntl6	0	4.695370337855065	0.475	0.027	0	Neuron
Caly	0	3.7535105085164746	0.495	0.048	0	Neuron
Fgf12	0	2.8763697336410603	0.507	0.06	0	Neuron
Map2k4	0	2.338596446303569	0.543	0.097	0	Neuron
Hecw1	0	4.233154389917516	0.474	0.028	0	Neuron
Tmem91	0	4.79533	0.462	0.017	0	Neuron
Dzip3	0	2.042297817223267	0.566	0.121	0	Neuron
Scn9a	0	4.697170547462145	0.467	0.023	0	Neuron
Fnbp1l	0	1.8090273762068896	0.584	0.14	0	Neuron
Kcnc2	0	3.751446767036185	0.492	0.049	0	Neuron
6330403K07Rik	0	2.8566535125048023	0.544	0.102	0	Neuron
Spock2	0	0.8717959409711765	0.557	0.115	0	Neuron
Brinp1	0	2.2379744608228114	0.522	0.08	0	Neuron
Ywhag	0	3.14766	0.509	0.067	0	Neuron
Cacna2d1	0	3.993801676393045	0.477	0.036	0	Neuron
Chgb	0	3.9755368433516294	0.483	0.042	0	Neuron
Reep1	0	2.5213966311547686	0.509	0.068	0	Neuron
Araf	0	1.8461749356621562	0.606	0.165	0	Neuron
Nbea	0	1.3865930295933202	0.709	0.268	0	Neuron
Map2	0	1.108071176479824	0.863	0.424	0	Neuron
Slc12a5	0	4.979442985779454	0.455	0.016	0	Neuron
Kifap3	0	1.5662376007327585	0.659	0.221	0	Neuron
Gabra1	0	4.019145578068226	0.467	0.03	0	Neuron
Sars	0	1.8370196539289187	0.588	0.151	0	Neuron
Cers4	0	2.3458578953642792	0.522	0.086	0	Neuron
Dscam	0	1.2229885815822112	0.557	0.121	0	Neuron
Nrsn2	0	5.012263489909064	0.453	0.018	0	Neuron
Rufy3	0	1.5106133231366907	0.634	0.199	0	Neuron
Pnck	0	3.5972482737884164	0.472	0.038	0	Neuron
Kcnma1	0	1.5881998323345543	0.592	0.16	0	Neuron
Grik2	0	1.6713368195835598	0.727	0.296	0	Neuron
Negr1	0	1.2843605124958237	0.728	0.297	0	Neuron
Dnm3	0	0.6073438169090071	0.696	0.265	0	Neuron
Mapt	0	0.4531954559825815	0.786	0.356	0	Neuron
Dpp10	0	2.517640728153985	0.508	0.078	0	Neuron
Atp6v0b	0	1.171171614908221	0.718	0.289	0	Neuron
Galnt13	0	2.4469182003932257	0.509	0.08	0	Neuron
Stxbp5l	0	3.515873974823699	0.473	0.044	0	Neuron
Maged1	0	2.095217518499783	0.594	0.165	0	Neuron
Pja2	0	1.761605187092411	0.632	0.204	0	Neuron
Syt4	0	4.345039481565854	0.462	0.034	0	Neuron
Ccser1	0	2.0995236209424015	0.607	0.179	0	Neuron
Unc5d	0	4.785743621088923	0.452	0.024	0	Neuron
Dnm1	0	3.3767813473566064	0.466	0.039	0	Neuron
Atl1	0	2.543346589039535	0.498	0.072	0	Neuron
Napb	0	3.7712248351970254	0.461	0.036	0	Neuron
Pcsk2	0	2.420667595823099	0.543	0.118	0	Neuron
Stau2	0	2.2317703847332315	0.519	0.096	0	Neuron
Prmt2	0	2.6844605342960555	0.488	0.065	0	Neuron
Chd5	0	2.63769	0.491	0.069	0	Neuron
Kif1a	0	1.1748681051565608	0.669	0.248	0	Neuron
Ptprd	0	1.4806729530260059	0.79	0.37	0	Neuron
Dync1i2	0	1.0884018157992235	0.794	0.378	0	Neuron
Dnm1l	0	1.461161722651821	0.636	0.221	0	Neuron
Tmem59l	0	3.366899457030649	0.468	0.053	0	Neuron
Asic2	0	2.388361830858597	0.587	0.172	0	Neuron
Epha6	0	3.669236880002165	0.457	0.043	0	Neuron
Cntnap5a	0	4.729330957043208	0.434	0.02	0	Neuron
Ntng1	0	5.57789	0.429	0.015	0	Neuron
Syngr3	0	4.265860620402455	0.434	0.02	0	Neuron
Nalcn	0	1.7692324653559126	0.563	0.149	0	Neuron
Sv2a	0	2.3748748026025264	0.51	0.097	0	Neuron
Cacna1b	0	4.3840381397727395	0.436	0.023	0	Neuron
Kcnb2	0	3.30757	0.467	0.055	0	Neuron
Nrxn3	0	1.618424647914133	0.784	0.372	0	Neuron
Cacna1a	0	2.0577029015340735	0.571	0.159	0	Neuron
Clstn3	0	3.714532481971625	0.44	0.029	0	Neuron
Kcnh7	0	4.221149110050858	0.44	0.029	0	Neuron
Cit	0	1.873328507764585	0.544	0.134	0	Neuron
AC149090.1	0	1.3873115864482286	0.726	0.316	0	Neuron
Gad2	0	4.451254479185126	0.439	0.029	0	Neuron
Gabrg3	0	2.1370903703410065	0.566	0.156	0	Neuron
Kmt2a	0	1.368972758014643	0.65	0.241	0	Neuron
Chl1	0	2.095571325558541	0.52	0.112	0	Neuron
Gabra3	0	3.0989389148257325	0.45	0.042	0	Neuron
Gdap1	0	3.0618619301934693	0.451	0.043	0	Neuron
Prkacb	0	1.928156546249042	0.541	0.133	0	Neuron
Rims2	0	1.6547104820704974	0.606	0.198	0	Neuron
Rnpc3	0	1.7847719737046792	0.583	0.177	0	Neuron
Fgf14	0	1.362456011390464	0.716	0.311	0	Neuron
Rufy2	0	1.5805076283646549	0.586	0.181	0	Neuron
Macrod2	0	1.5643409028501523	0.638	0.234	0	Neuron
Nktr	0	1.2214272839553293	0.697	0.294	0	Neuron
Gria3	0	1.8418034668633962	0.511	0.109	0	Neuron
Usp14	0	2.2633899151634473	0.486	0.084	0	Neuron
Syt5	0	3.8093666831317328	0.434	0.034	0	Neuron
Tspyl2	0	2.391621924648434	0.478	0.078	0	Neuron
Soga3	0	1.3103386111661277	0.598	0.2	0	Neuron
Cacna1e	0	3.021529172444608	0.449	0.052	0	Neuron
Pnmal2	0	2.9738022272535525	0.503	0.106	0	Neuron
Tenm4	0	2.1872910040304085	0.524	0.127	0	Neuron
Tmem191c	0	3.0696867831744714	0.44	0.043	0	Neuron
2210016L21Rik	0	1.8082665302832697	0.581	0.184	0	Neuron
Epb41l3	0	1.0470175145248832	0.551	0.155	0	Neuron
Pld3	0	2.7950590422736576	0.462	0.066	0	Neuron
Kcnq1ot1	0	1.341033629295116	0.695	0.299	0	Neuron
Copg2	0	1.688937210636258	0.533	0.139	0	Neuron
Tusc3	0	1.8008050429118656	0.505	0.111	0	Neuron
Syn1	0	3.4760505694328656	0.426	0.033	0	Neuron
Mirg	0	4.850892687027414	0.41	0.017	0	Neuron
Tanc2	0	0.7377715220390157	0.649	0.257	0	Neuron
Nrsn1	0	3.8619467429087955	0.423	0.032	0	Neuron
R3hdm1	0	1.1972215806054107	0.658	0.267	0	Neuron
Ddx24	0	1.593364835321827	0.613	0.223	0	Neuron
Rab6b	0	2.7416802573200707	0.455	0.065	0	Neuron
App	0	0.3644070198678575	0.851	0.461	0	Neuron
Herc1	0	1.3166810855329454	0.598	0.209	0	Neuron
Samd12	0	2.241218925489152	0.484	0.097	0	Neuron
Chga	0	3.7066433284395557	0.417	0.031	0	Neuron
Gls	0	2.1164020774853936	0.48	0.094	0	Neuron
Akap6	0	0.9924938502641074	0.666	0.281	0	Neuron
Basp1	0	1.6666002085800704	0.515	0.13	0	Neuron
Cadm3	0	3.247951155005204	0.419	0.034	0	Neuron
Eml5	0	1.8889215445368388	0.516	0.131	0	Neuron
Srrm4	0	4.538623205837586	0.404	0.02	0	Neuron
Adam23	0	3.081875694574184	0.428	0.045	0	Neuron
Pde4dip	0	1.5713528567653212	0.532	0.149	0	Neuron
Rbfox3	0	4.216753874494611	0.403	0.02	0	Neuron
Celf5	0	3.79932	0.407	0.024	0	Neuron
Khdrbs2	0	2.591839406640361	0.447	0.065	0	Neuron
Jakmip2	0	2.1605631752868453	0.456	0.075	0	Neuron
Dner	0	1.3486429060802003	0.551	0.172	0	Neuron
Dcc	0	1.7256211246660487	0.497	0.118	0	Neuron
Kif3a	0	1.0897143029598244	0.635	0.256	0	Neuron
Nipsnap1	0	2.8476504727451593	0.427	0.048	0	Neuron
Csrnp3	0	1.9461957186378334	0.484	0.106	0	Neuron
Cd200	0	2.3323445743975384	0.467	0.09	0	Neuron
Frrs1l	0	3.00164	0.414	0.037	0	Neuron
Akap8l	0	1.122591706651154	0.671	0.295	0	Neuron
Tecr	0	1.1522791698505985	0.726	0.35	0	Neuron
Tspyl4	0	2.8054333634026745	0.459	0.083	0	Neuron
Elavl3	0	0.8543138207519805	0.536	0.161	0	Neuron
Ina	0	3.580123599861722	0.402	0.027	0	Neuron
Napg	0	2.027968661793828	0.474	0.099	0	Neuron
Nexmif	0	2.9132188944505186	0.416	0.041	0	Neuron
Prkce	0	1.7647234000962242	0.492	0.118	0	Neuron
Atp6v1g2	0	3.8055915798789437	0.402	0.029	0	Neuron
Gpi1	0	1.4194097800323757	0.536	0.163	0	Neuron
Mllt11	0	3.4609881951543633	0.409	0.036	0	Neuron
Bex2	0	3.4377826064327808	0.455	0.084	0	Neuron
Micu3	0	1.8425007531303144	0.476	0.105	0	Neuron
Dock3	0	1.5865062556437326	0.532	0.162	0	Neuron
Dtd1	0	1.7061776570186336	0.493	0.123	0	Neuron
Acot7	0	2.0054586766913816	0.471	0.102	0	Neuron
Mapk10	0	0.8647275879079404	0.633	0.264	0	Neuron
Rph3a	0	2.581039383340592	0.416	0.048	0	Neuron
Gnao1	0	1.1470506046869575	0.654	0.287	0	Neuron
Pcdh15	0	0.7218057144083005	0.555	0.188	0	Neuron
Chd3os	0	3.148778322018771	0.44	0.073	0	Neuron
Rbfox2	0	1.5732867334510854	0.497	0.13	0	Neuron
Osbpl6	0	2.048068134260112	0.471	0.105	0	Neuron
Spock1	0	1.9461265234116278	0.44	0.074	0	Neuron
Rtn3	0	1.0556509522359674	0.867	0.502	0	Neuron
Etnk1	0	1.213262408627172	0.562	0.198	0	Neuron
Garnl3	0	3.378171505809757	0.4	0.036	0	Neuron
Arhgef9	0	1.4849397670513511	0.5	0.136	0	Neuron
Gng3	0	2.5411143152553746	0.438	0.074	0	Neuron
Pkia	0	1.5493448276060175	0.486	0.122	0	Neuron
Thy1	0	4.123891304409816	0.391	0.027	0	Neuron
Trim2	0	0.6403811958721113	0.658	0.295	0	Neuron
Zfp612	0	2.243396382473587	0.434	0.071	0	Neuron
Tspan7	0	1.102970723290638	0.654	0.292	0	Neuron
Cdh8	0	3.6225548270456267	0.396	0.034	0	Neuron
Pgm2l1	0	3.8413024634372697	0.387	0.025	0	Neuron
Tia1	0	1.1949379820605186	0.614	0.252	0	Neuron
Syn2	0	1.138368849188379	0.54	0.179	0	Neuron
G3bp2	0	1.6960245172878374	0.579	0.218	0	Neuron
Unc5c	0	1.3387060956098544	0.517	0.156	0	Neuron
Pdzd4	0	3.1370703054720512	0.403	0.043	0	Neuron
Rab3a	0	3.826856438688686	0.402	0.042	0	Neuron
Dclk1	0	1.0114434748299903	0.608	0.248	0	Neuron
Prkg1	0	1.7754743367301178	0.51	0.15	0	Neuron
Snap47	0	2.561151812333666	0.442	0.082	0	Neuron
Csmd1	0	0.9332612554553394	0.667	0.308	0	Neuron
Miat	0	3.2719346933767053	0.396	0.037	0	Neuron
Cacnb2	0	1.8623125162770076	0.478	0.119	0	Neuron
Atp2b2	0	1.6494022547872267	0.464	0.106	0	Neuron
Gas5	0	0.8312013736962449	0.671	0.313	0	Neuron
Ank2	0	0.4431190099881026	0.878	0.52	0	Neuron
Faim2	0	2.354668851726507	0.436	0.078	0	Neuron
Myo9a	0	0.9343626546001061	0.626	0.268	0	Neuron
Nsg1	0	3.0011411208705976	0.418	0.06	0	Neuron
2410089E03Rik	0	1.6475065614430684	0.544	0.187	0	Neuron
Aak1	0	1.3223482782636613	0.53	0.173	0	Neuron
Pgrmc1	0	2.603097148410062	0.475	0.118	0	Neuron
Rogdi	0	1.9636781168534658	0.444	0.087	0	Neuron
Sncb	0	4.447773046234378	0.377	0.02	0	Neuron
Klc1	0	1.3066182212426642	0.534	0.178	0	Neuron
Elmod1	0	1.4888469239877429	0.473	0.117	0	Neuron
Grid2	0	1.1176231476946796	0.712	0.356	0	Neuron
Lrrfip1	0	1.74328	0.459	0.104	0	Neuron
Crmp1	0	3.55338	0.382	0.027	0	Neuron
Grik1	0	1.9719832007469527	0.485	0.13	0	Neuron
Kcnc1	0	4.172003893720523	0.374	0.019	0	Neuron
Rangap1	0	2.6887298038426986	0.418	0.063	0	Neuron
Usp11	0	2.011283173625161	0.446	0.091	0	Neuron
Nop56	0	1.8434617876853547	0.459	0.105	0	Neuron
A730017C20Rik	0	2.8076609715907956	0.409	0.055	0	Neuron
Evl	0	2.11301	0.417	0.063	0	Neuron
Ica1	0	2.547320754289227	0.403	0.05	0	Neuron
Cacna1c	0	2.5193664778420413	0.419	0.066	0	Neuron
Srsf11	0	0.8655779474055012	0.745	0.392	0	Neuron
Ckmt1	0	4.239114157343387	0.368	0.016	0	Neuron
Frmpd4	0	3.8212550591781187	0.381	0.029	0	Neuron
Myh10	0	2.0020545823164957	0.433	0.081	0	Neuron
Atp6v1a	0	1.6966839447100202	0.556	0.206	0	Neuron
Bex1	0	3.488113437496952	0.385	0.035	0	Neuron
Disp2	0	3.9471623821976176	0.369	0.019	0	Neuron
Fxyd6	0	2.320319332895344	0.417	0.067	0	Neuron
Clvs1	0	4.557569071900265	0.364	0.015	0	Neuron
Nell2	0	2.5992529938711657	0.399	0.051	0	Neuron
Pnn	0	0.8644525951386464	0.8	0.452	0	Neuron
Adam22	0	1.4301722456674437	0.492	0.145	0	Neuron
Dnajc6	0	1.3350886636862307	0.475	0.128	0	Neuron
Olfm3	0	3.9414266187833196	0.372	0.025	0	Neuron
Tubb2a	0	2.830819252787025	0.451	0.105	0	Neuron
Golgb1	0	0.6943937008227536	0.706	0.36	0	Neuron
Ptpn5	0	3.483873211078607	0.372	0.026	0	Neuron
Chd3	0	1.7520690439993267	0.432	0.087	0	Neuron
L1cam	0	3.8271356981218876	0.366	0.021	0	Neuron
Slc24a3	0	1.6952543825348143	0.462	0.118	0	Neuron
Usp34	0	0.7903830745888025	0.68	0.336	0	Neuron
Fubp1	0	0.8381024184610837	0.644	0.301	0	Neuron
Rbm5	0	0.8969486960140287	0.693	0.35	0	Neuron
Atcay	0	2.3954592994388753	0.394	0.052	0	Neuron
Herc3	0	2.725005998084821	0.397	0.055	0	Neuron
Add2	0	3.48969	0.37	0.028	0	Neuron
Cep112	0	2.0459168406498245	0.478	0.137	0	Neuron
Nell1	0	4.647626412334338	0.357	0.016	0	Neuron
Pcsk1n	0	2.403872085160355	0.55	0.21	0	Neuron
Cltb	0	1.493652433340747	0.463	0.123	0	Neuron
Kcnip1	0	2.328440800113638	0.414	0.074	0	Neuron
Pcmt1	0	1.1378440785071453	0.554	0.215	0	Neuron
Agbl4	0	1.1920506186924165	0.532	0.193	0	Neuron
Dmtn	0	4.160288754051065	0.356	0.017	0	Neuron
Tango2	0	1.9152865369916185	0.424	0.085	0	Neuron
Cntn4	0	2.0896533115336093	0.427	0.089	0	Neuron
Anapc5	0	1.2535767561759428	0.522	0.186	0	Neuron
Cpne6	0	3.4613298066898452	0.363	0.027	0	Neuron
Zfp804b	0	4.932828838889488	0.356	0.02	0	Neuron
Ddhd2	0	1.3553383223164124	0.48	0.145	0	Neuron
Grm1	0	4.9738136762658955	0.348	0.013	0	Neuron
Ndfip1	0	1.0808820536220838	0.511	0.177	0	Neuron
Slc4a10	0	2.1999921480622184	0.404	0.07	0	Neuron
Ywhah	0	3.142150032561557	0.411	0.077	0	Neuron
Gpm6a	0	0.44872934477788506	0.698	0.365	0	Neuron
Mdga2	0	0.44059750261508945	0.795	0.463	0	Neuron
Tceal5	0	2.754913374016625	0.371	0.04	0	Neuron
Upp2	0	1.9072260527479257	0.45	0.119	0	Neuron
Celf6	0	4.319545243721938	0.347	0.016	0	Neuron
Fyttd1	0	1.241109547362655	0.478	0.148	0	Neuron
Trank1	0	4.57241	0.343	0.014	0	Neuron
Zdbf2	0	2.9411140123940136	0.371	0.042	0	Neuron
Zfr	0	0.7086021516138319	0.753	0.424	0	Neuron
Camkv	0	4.074562743925996	0.351	0.022	0	Neuron
Rasgef1a	0	4.293979728400261	0.344	0.015	0	Neuron
Zc3h13	0	0.8151844390907401	0.599	0.27	0	Neuron
Cadm1	0	0.847434	0.748	0.42	0	Neuron
Pde10a	0	2.8284013450941172	0.392	0.064	0	Neuron
Shtn1	0	1.170460212254795	0.463	0.135	0	Neuron
St8sia3	0	2.761901496701438	0.367	0.039	0	Neuron
Fndc3a	0	1.2814961642182348	0.484	0.156	0	Neuron
Clip1	0	0.9039011461074702	0.521	0.194	0	Neuron
Gdi1	0	1.258915308833667	0.521	0.194	0	Neuron
Serp2	0	3.3184828697480264	0.357	0.03	0	Neuron
Mdh1	0	2.125990388480329	0.53	0.204	0	Neuron
Srsf7	0	1.0359483964167606	0.543	0.217	0	Neuron
Ap3b2	0	1.8807030855571432	0.402	0.076	0	Neuron
Pdzrn4	0	2.5740202075290206	0.389	0.063	0	Neuron
March1	0	1.0510245141432533	0.486	0.16	0	Neuron
Cmip	0	0.9508862717560651	0.535	0.21	0	Neuron
Sept3	0	1.9371579585805399	0.4	0.075	0	Neuron
Tra2a	0	0.6677214539885881	0.743	0.418	0	Neuron
Chn1	0	1.560832765792306	0.424	0.099	0	Neuron
Cacng2	0	3.924274629473206	0.341	0.017	0	Neuron
Myef2	0	1.7063663244324205	0.429	0.105	0	Neuron
Ppp1r9a	0	0.7325089807704641	0.641	0.317	0	Neuron
Timm9	0	2.144771311187037	0.391	0.067	0	Neuron
Wdr6	0	2.2490899758917307	0.388	0.064	0	Neuron
Ptprs	0	1.237070968855679	0.478	0.154	0	Neuron
Snrnp70	0	0.6586621316164143	0.835	0.511	0	Neuron
Ankrd12	0	0.5652755871429009	0.736	0.413	0	Neuron
Slc22a17	0	1.0558644350145112	0.511	0.188	0	Neuron
Atxn10	0	0.9430506134759878	0.586	0.263	0	Neuron
Kifc2	0	3.5162774186142354	0.351	0.028	0	Neuron
Ryr3	0	2.216758247894349	0.409	0.086	0	Neuron
Prkcb	0	0.9535055582469862	0.467	0.145	0	Neuron
Fam126b	0	1.4628852148832956	0.442	0.12	0	Neuron
Map6	0	2.1774275132209633	0.388	0.066	0	Neuron
Slc8a3	0	2.438550486272319	0.372	0.05	0	Neuron
Kalrn	0	1.7409206677945377	0.437	0.116	0	Neuron
Tmem179	0	3.5364432392584053	0.342	0.021	0	Neuron
Atp2b1	0	0.8191643040553422	0.69	0.369	0	Neuron
Rasgrf2	0	4.116366993683472	0.342	0.022	0	Neuron
Slc4a3	0	2.6009090278010336	0.368	0.048	0	Neuron
Svop	0	3.872302529772808	0.338	0.018	0	Neuron
Syngr1	0	1.9979731506840082	0.383	0.063	0	Neuron
Plppr4	0	1.664491036518844	0.416	0.096	0	Neuron
Cyfip2	0	2.1200397552112005	0.374	0.055	0	Neuron
Epb41l1	0	2.5164605326629372	0.372	0.053	0	Neuron
Map9	0	1.9046521910118885	0.408	0.09	0	Neuron
Nars	0	1.01579	0.573	0.255	0	Neuron
N4bp2l1	0	2.3480079302751045	0.373	0.056	0	Neuron
Sez6l	0	1.6579312262201311	0.394	0.077	0	Neuron
Ncald	0	1.1694827656120539	0.471	0.154	0	Neuron
Nefl	0	3.838145872069198	0.344	0.027	0	Neuron
Mtch1	0	2.0664553719904664	0.39	0.074	0	Neuron
Pja1	0	2.344223673885343	0.399	0.083	0	Neuron
Ryr2	0	2.8117101543604353	0.374	0.058	0	Neuron
Susd4	0	1.8019860088716322	0.382	0.067	0	Neuron
Pde4d	0	1.0214375532619164	0.666	0.352	0	Neuron
Mapk8ip2	0	2.593536984685872	0.353	0.039	0	Neuron
Srpk2	0	0.6887473252966863	0.633	0.319	0	Neuron
Sybu	0	1.0895453545946574	0.504	0.19	0	Neuron
Atp6v1d	0	1.7210602021133377	0.47	0.156	0	Neuron
Camk2d	0	0.8123477370169212	0.537	0.224	0	Neuron
Rock2	0	0.7087678911807656	0.554	0.241	0	Neuron
Amy1	0	1.791382078750174	0.417	0.104	0	Neuron
Snx10	0	1.5950588361383642	0.432	0.119	0	Neuron
Tmem57	0	1.3908658982740238	0.441	0.128	0	Neuron
Pcdh17	0	0.7766668977319071	0.589	0.276	0	Neuron
Strbp	0	0.6291686249361956	0.713	0.4	0	Neuron
Srrm2	0	1.1558133780806013	0.909	0.597	0	Neuron
Ak5	0	3.127357269754324	0.341	0.029	0	Neuron
Cacna2d2	0	2.588541599947293	0.362	0.05	0	Neuron
Pds5b	0	1.0710666613573137	0.486	0.174	0	Neuron
Slc35f1	0	0.7524875942176278	0.432	0.12	0	Neuron
Sptbn4	0	3.5935630164852017	0.337	0.025	0	Neuron
Ankrd24	0	3.169218117242065	0.345	0.033	0	Neuron
Vat1l	0	2.887478269875248	0.347	0.035	0	Neuron
Bicd1	0	0.8863713322225704	0.518	0.207	0	Neuron
Csmd3	0	0.6540545355200549	0.682	0.371	0	Neuron
Hmgcll1	0	2.8432992178655425	0.354	0.043	0	Neuron
Olfm1	0	2.87298	0.366	0.055	0	Neuron
Smarca1	0	2.235478080088647	0.36	0.049	0	Neuron
Oxr1	0	1.0266339583135349	0.581	0.27	0	Neuron
Pnmal1	0	3.1688988726433274	0.344	0.033	0	Neuron
Atpif1	0	1.416656531478092	0.558	0.248	0	Neuron
Dbn1	0	3.2484287580419413	0.338	0.028	0	Neuron
Matr3	0	1.0530844070599428	0.653	0.343	0	Neuron
Prepl	0	2.5506133005278793	0.356	0.046	0	Neuron
Zmynd11	0	0.6302164631277953	0.64	0.33	0	Neuron
Eml6	0	1.4493136031267775	0.472	0.162	0	Neuron
Mtf2	0	1.2427020358164425	0.452	0.143	0	Neuron
Idh3b	0	1.1197058275770142	0.488	0.179	0	Neuron
Lnpk	0	1.9600194886592157	0.383	0.074	0	Neuron
Rgs7	0	1.37848	0.427	0.118	0	Neuron
Grip1	0	2.1412909063562435	0.408	0.099	0	Neuron
Cntnap4	0	4.832526891211274	0.32	0.012	0	Neuron
Reep2	0	2.7816937175822916	0.344	0.036	0	Neuron
Tmem178b	0	1.0374960171571221	0.481	0.173	0	Neuron
Pak1	0	0.4790792067475146	0.468	0.161	0	Neuron
Ksr2	0	3.579366773249892	0.334	0.027	0	Neuron
Hprt	0	1.968729472190597	0.394	0.088	0	Neuron
Cpne7	0	5.235159486616202	0.315	0.009	0	Neuron
Rnf112	0	4.547154618171858	0.318	0.013	0	Neuron
Syt13	0	4.238913726769551	0.319	0.014	0	Neuron
A230050P20Rik	0	2.9624317141072294	0.338	0.034	0	Neuron
Bscl2	0	1.5801477562456165	0.398	0.094	0	Neuron
Gabrb2	0	3.0284388376941647	0.338	0.034	0	Neuron
Psma1	0	0.9739096623449331	0.462	0.158	0	Neuron
Taf1d	0	1.2511593125026204	0.462	0.158	0	Neuron
C530008M17Rik	0	1.3573471975085802	0.436	0.132	0	Neuron
Robo2	0	2.5022668863418076	0.376	0.072	0	Neuron
Tial1	0	0.9447467350972756	0.524	0.221	0	Neuron
Chka	0	1.0181207967647516	0.505	0.202	0	Neuron
Dgkb	0	0.6027861195035871	0.607	0.304	0	Neuron
Htr2c	0	5.194874441498515	0.314	0.011	0	Neuron
Lrrtm3	0	1.1852425385097562	0.407	0.104	0	Neuron
Galnt17	0	3.098043118384974	0.337	0.035	0	Neuron
Gm20721	0	1.898127159769912	0.392	0.09	0	Neuron
Sms	0	3.0245042018226362	0.334	0.032	0	Neuron
Cpeb3	0	0.959486	0.472	0.17	0	Neuron
Nav3	0	0.5906344806183381	0.549	0.248	0	Neuron
Dlgap2	0	3.816318453334185	0.326	0.025	0	Neuron
Slc7a14	0	3.9199295390886855	0.319	0.018	0	Neuron
Got1	0	3.265252336227207	0.336	0.036	0	Neuron
Tubb3	0	3.5474469256794743	0.33	0.03	0	Neuron
Adar	0	2.0436163900681374	0.366	0.066	0	Neuron
Atp6v1c1	0	1.8463149928207159	0.407	0.107	0	Neuron
Ola1	0	1.4496580347790657	0.417	0.118	0	Neuron
Cnrip1	0	1.6285529643844634	0.379	0.081	0	Neuron
Cntn6	0	2.3507414906394417	0.354	0.056	0	Neuron
Egfem1	0	3.0096564288783076	0.344	0.046	0	Neuron
Fstl5	0	3.988833510242733	0.317	0.019	0	Neuron
Hs6st2	0	3.575509977526452	0.323	0.025	0	Neuron
C130073E24Rik	0	3.2910557609159383	0.333	0.036	0	Neuron
Pi4ka	0	1.193589504071918	0.447	0.15	0	Neuron
Slc25a12	0	0.9362891016637314	0.462	0.165	0	Neuron
Fbxl2	0	1.5297163127018607	0.411	0.114	0	Neuron
Casc4	0	0.6974304930120893	0.514	0.218	0	Neuron
Dnajc5	0	1.2758540962889255	0.451	0.155	0	Neuron
Fkbp3	0	1.7925498057152676	0.536	0.24	0	Neuron
Synj1	0	0.9720995012648885	0.465	0.169	0	Neuron
Slc17a6	0	4.95758	0.31	0.014	0	Neuron
Akap11	0	0.9130445049532454	0.467	0.172	0	Neuron
Amph	0	1.3899495965128157	0.394	0.099	0	Neuron
Plcb4	0	0.8269167682651383	0.555	0.26	0	Neuron
RMST-1	0	1.52025	0.459	0.164	0	Neuron
Gripap1	0	1.1579164317355837	0.43	0.135	0	Neuron
Plcxd3	0	3.9441165226519805	0.313	0.018	0	Neuron
Zkscan16	0	3.770114697643683	0.314	0.019	0	Neuron
Sptan1	0	0.721867	0.513	0.219	0	Neuron
Ylpm1	0	0.874838	0.5	0.206	0	Neuron
Zmynd8	0	0.8288651376693902	0.522	0.228	0	Neuron
Rragb	0	1.9567210677530626	0.358	0.064	0	Neuron
Cacnb4	0	0.9391385339846006	0.431	0.138	0	Neuron
Ggnbp2	0	0.6130361188464305	0.577	0.284	0	Neuron
Nav1	0	0.5868010883909294	0.458	0.166	0	Neuron
Tnrc6a	0	0.8165224107292951	0.542	0.25	0	Neuron
Erlec1	0	0.8032722006695607	0.485	0.193	0	Neuron
Hdac11	0	1.989055852509825	0.352	0.06	0	Neuron
Rapgef6	0	0.9545080276786222	0.484	0.192	0	Neuron
Nemf	0	0.6689244245642608	0.56	0.269	0	Neuron
Rab27b	0	2.830951072516494	0.32	0.029	0	Neuron
Fam171b	0	0.8418001758339857	0.456	0.166	0	Neuron
Gdpd1	0	1.499003145675351	0.381	0.091	0	Neuron
Vamp2	0	2.032260094171872	0.377	0.087	0	Neuron
Ogfod1	0	2.2031198273587824	0.344	0.054	0	Neuron
Pnma3	0	4.1393297777445675	0.304	0.014	0	Neuron
Acadsb	0	0.9858694852214067	0.465	0.176	0	Neuron
Cntnap5b	0	3.4763774324473053	0.32	0.031	0	Neuron
Luc7l3	0	0.594772	0.863	0.574	0	Neuron
Nmnat2	0	1.2913869253318233	0.388	0.099	0	Neuron
Sec61a2	0	1.0586215061755189	0.451	0.162	0	Neuron
Ttc19	0	1.077468251909103	0.438	0.149	0	Neuron
Ensa	0	1.3303790827187272	0.413	0.124	0	Neuron
Nfx1	0	1.1892730502607372	0.429	0.14	0	Neuron
Nyap2	0	4.554488765598225	0.303	0.014	0	Neuron
Celf2	0	0.8173982778007418	0.65	0.362	0	Neuron
Rapgef4	0	1.695978489477288	0.383	0.095	0	Neuron
Rnf14	0	1.643895234844201	0.387	0.099	0	Neuron
Copg1	0	1.9247381542883517	0.359	0.071	0	Neuron
Hspa4l	0	0.6624333660767325	0.489	0.201	0	Neuron
Rbms3	0	2.4139982949731777	0.346	0.058	0	Neuron
1110051M20Rik	0	0.627096	0.513	0.226	0	Neuron
Cbarp	0	2.6156672604986286	0.331	0.044	0	Neuron
Pdlim7	0	3.0411261571940256	0.319	0.032	0	Neuron
C2cd5	0	1.3481986324130686	0.412	0.125	0	Neuron
Dennd5b	0	1.1653679148075973	0.421	0.134	0	Neuron
Pde1a	0	1.9825459731332256	0.356	0.069	0	Neuron
Psip1	0	0.6838499192595775	0.606	0.319	0	Neuron
Rsrp1	0	0.7153805201006045	0.837	0.55	0	Neuron
Lpgat1	0	1.1162008292321537	0.394	0.108	0	Neuron
Tspan13	0	0.7184579038101455	0.439	0.153	0	Neuron
Vti1b	0	0.9663646329987179	0.456	0.17	0	Neuron
Cep70	0	2.325120620297191	0.354	0.068	0	Neuron
Clstn2	0	2.874719814826152	0.331	0.046	0	Neuron
Hdgfl3	0	0.9784649999835444	0.442	0.157	0	Neuron
Zbtb11	0	1.4804826900215349	0.382	0.097	0	Neuron
Rhbdd2	0	1.761028019750693	0.364	0.079	0	Neuron
Armcx1	0	2.3591755768923175	0.329	0.045	0	Neuron
Gnb5	0	2.4444049599118953	0.326	0.042	0	Neuron
Sgsm1	0	2.3468016634324536	0.335	0.051	0	Neuron
Zfp804a	0	3.16141	0.318	0.034	0	Neuron
Zfp950	0	0.8558675389537626	0.495	0.211	0	Neuron
A330023F24Rik	0	1.9854205837928194	0.366	0.082	0	Neuron
Fgf13	0	1.87455	0.345	0.061	0	Neuron
Ppp3cb	0	1.3442666369411536	0.396	0.113	0	Neuron
Thoc7	0	0.89358	0.452	0.169	0	Neuron
Ablim3	0	3.9403355923582746	0.301	0.018	0	Neuron
Ssbp4	0	1.3706738490677073	0.408	0.125	0	Neuron
Mphosph8	0	0.7408893811555846	0.513	0.231	0	Neuron
Sh3gl2	0	1.4365226935609998	0.368	0.086	0	Neuron
Thoc1	0	1.151001623879851	0.445	0.163	0	Neuron
Bbs4	0	1.7495488723863475	0.36	0.078	0	Neuron
Jph4	0	1.8668222343641705	0.348	0.066	0	Neuron
Mical3	0	1.2566016588324695	0.412	0.13	0	Neuron
Zfp941	0	3.711053199024095	0.301	0.019	0	Neuron
Fam219a	0	1.125446409140792	0.411	0.13	0	Neuron
Mgat4c	0	1.1262603223340464	0.485	0.205	0	Neuron
Nop58	0	1.12609	0.408	0.128	0	Neuron
Serpini1	0	3.2461819490241455	0.306	0.026	0	Neuron
Trim46	0	3.4357978096460773	0.303	0.023	0	Neuron
A330102I10Rik	0	3.0043848007838507	0.31	0.031	0	Neuron
Ncdn	0	2.9543568150213777	0.323	0.044	0	Neuron
Nsd2	0	1.0234391683989073	0.428	0.149	0	Neuron
Rab6a	0	1.1931114586997187	0.553	0.274	0	Neuron
Usp33	0	0.9804953025808216	0.425	0.146	0	Neuron
Fam13b	0	0.9702476690859826	0.419	0.14	0	Neuron
Atf2	0	0.7617925403021291	0.455	0.177	0	Neuron
Glrb	0	0.9469983748297208	0.405	0.127	0	Neuron
Glyr1	0	0.8639898291691206	0.462	0.184	0	Neuron
Lancl1	0	1.4286969835593513	0.377	0.099	0	Neuron
Nap1l3	0	2.5459411111616617	0.329	0.051	0	Neuron
4930447C04Rik	0	4.3927786416013355	0.292	0.014	0	Neuron
Ache	0	3.5809056901359133	0.294	0.016	0	Neuron
Kcnq1	0	1.510825689090063	0.417	0.139	0	Neuron
4932438A13Rik	0	0.9870215526744939	0.439	0.162	0	Neuron
Actr1b	0	1.9097795893028278	0.343	0.066	0	Neuron
Cntn3	0	2.9558287987297454	0.315	0.038	0	Neuron
Gnl3	0	1.5086973464150957	0.381	0.104	0	Neuron
Actl6b	0	4.074266657771855	0.291	0.014	0	Neuron
Fam135b	0	3.9296219350116823	0.296	0.019	0	Neuron
Pianp	0	3.169917596887926	0.3	0.023	0	Neuron
Atp8a2	0	1.8418389623411637	0.323	0.047	0	Neuron
Polb	0	0.9272738885304063	0.457	0.181	0	Neuron
Rnps1	0	1.423752046905709	0.376	0.1	0	Neuron
Syt16	0	2.682460041790993	0.31	0.034	0	Neuron
Wsb1	0	0.875969	0.465	0.189	0	Neuron
Zdhhc2	0	1.4667186562886052	0.365	0.089	0	Neuron
Sphkap	0	4.613531263254213	0.288	0.012	0	Neuron
Stk25	0	1.7681716607208582	0.345	0.069	0	Neuron
Ccdc85a	0	1.1708521112945522	0.396	0.121	0	Neuron
Mblac2	0	1.7210168488062303	0.345	0.07	0	Neuron
Entpd6	0	2.316359953704769	0.319	0.045	0	Neuron
Gnal	0	1.3684677454510068	0.373	0.099	0	Neuron
Golga4	0	0.6655266510870286	0.528	0.254	0	Neuron
Mmp16	0	0.5702814232681137	0.405	0.131	0	Neuron
Gm1673	0	1.5524131133121042	0.409	0.135	0	Neuron
Brinp3	0	0.7003070509404195	0.506	0.233	0	Neuron
Gmps	0	1.4313898852797537	0.378	0.105	0	Neuron
Haghl	0	1.0076704415971978	0.422	0.149	0	Neuron
Gm16105	0	3.999696879901425	0.288	0.015	0	Neuron
Mir124a-1hg	0	3.9698176745995934	0.29	0.017	0	Neuron
Slc2a13	0	3.474130118800674	0.301	0.028	0	Neuron
Tmsb10	0	1.6705310056092824	0.388	0.116	0	Neuron
Vstm2a	0	2.6600973147200566	0.306	0.034	0	Neuron
Ndrg3	0	0.9639353879135151	0.412	0.14	0	Neuron
Cep170	0	0.929922	0.424	0.153	0	Neuron
Cstf2	0	2.16737	0.329	0.058	0	Neuron
Hectd4	0	1.2926144160154573	0.377	0.106	0	Neuron
Itfg1	0	0.824155	0.464	0.193	0	Neuron
Psmd12	0	0.9943025743408783	0.422	0.151	0	Neuron
Psmd14	0	0.826813	0.447	0.176	0	Neuron
Ttc4	0	1.3990210301859147	0.383	0.112	0	Neuron
Zcchc17	0	1.1853238154625436	0.415	0.144	0	Neuron
Ccdc136	0	2.0111117693800202	0.349	0.078	0	Neuron
Cend1	0	3.288209803533903	0.299	0.028	0	Neuron
Alg2	0	2.1232787702205655	0.335	0.065	0	Neuron
Appl1	0	0.7543982485102056	0.458	0.188	0	Neuron
Cx3cl1	0	2.708703087879445	0.305	0.035	0	Neuron
Las1l	0	1.1322242001301281	0.411	0.141	0	Neuron
Ndufa10	0	0.8097903498207943	0.487	0.217	0	Neuron
P4htm	0	1.3474196667225034	0.376	0.106	0	Neuron
Slc25a27	0	1.3884402609099407	0.377	0.107	0	Neuron
Smg1	0	0.9341875554235426	0.449	0.179	0	Neuron
Lin7a	0	2.8010529871828824	0.299	0.029	0	Neuron
Nrg3os	0	3.6008681199066146	0.297	0.027	0	Neuron
Rcan2	0	1.035204076107108	0.374	0.105	0	Neuron
Zc3h15	0	0.829621	0.483	0.214	0	Neuron
Abhd18	0	1.1709847907993582	0.408	0.139	0	Neuron
Ociad2	0	3.3109742518274876	0.294	0.025	0	Neuron
Zmat4	0	4.506833458094467	0.283	0.014	0	Neuron
Bex3	0	1.600921889039751	0.438	0.17	0	Neuron
Hagh	0	1.342845329104704	0.367	0.099	0	Neuron
Iqcb1	0	1.1248857451470466	0.392	0.124	0	Neuron
Pfkp	0	1.3889232959037952	0.365	0.097	0	Neuron
Rnf25	0	2.3776583912848506	0.321	0.053	0	Neuron
Rp9	0	0.8817117674682601	0.425	0.157	0	Neuron
Tagln3	0	1.8326	0.362	0.094	0	Neuron
Jakmip1	0	1.0578291537400344	0.385	0.118	0	Neuron
Kantr	0	1.6221191721594406	0.342	0.075	0	Neuron
Kcnq5	0	2.592173132326942	0.328	0.061	0	Neuron
Tmem255a	0	2.418611532595877	0.309	0.042	0	Neuron
1500004A13Rik	0	0.8985976819031286	0.415	0.149	0	Neuron
Efna5	0	2.309407249325276	0.328	0.062	0	Neuron
Ptbp2	0	0.7863422608387339	0.439	0.173	0	Neuron
Tcerg1	0	0.8828673098361189	0.429	0.163	0	Neuron
Trp53bp1	0	1.3994544851905106	0.358	0.092	0	Neuron
Ywhaz	0	1.358936239500173	0.5	0.234	0	Neuron
Klhl29	0	3.4385237354651563	0.292	0.026	0	Neuron
Ralgapa2	0	1.802092987607927	0.344	0.078	0	Neuron
Atp6ap2	0	1.2444449039561858	0.437	0.172	0	Neuron
Celf3	0	3.8466913492438626	0.281	0.016	0	Neuron
Nicn1	0	1.508060843454171	0.357	0.092	0	Neuron
Ntrk3	0	0.7470300497301723	0.446	0.181	0	Neuron
Atp2b3	0	3.7668943554990704	0.282	0.017	0	Neuron
Calm2	0	1.728457074471803	0.602	0.337	0	Neuron
Cd99l2	0	1.6434983148847992	0.344	0.079	0	Neuron
Nap1l2	0	3.3703276950716083	0.288	0.023	0	Neuron
Ate1	0	0.6095675562295049	0.455	0.191	0	Neuron
Ggt7	0	2.1558	0.309	0.045	0	Neuron
Npdc1	0	1.167180595570072	0.397	0.133	0	Neuron
Pgap1	0	2.017628665546431	0.322	0.058	0	Neuron
Plppr3	0	2.6295212446840495	0.303	0.039	0	Neuron
Snca	0	2.9199215675004875	0.296	0.032	0	Neuron
Calb2	0	4.325388114087762	0.289	0.025	0	Neuron
Cdh12	0	3.9941470525116327	0.283	0.019	0	Neuron
Dpysl3	0	1.4570029774235493	0.323	0.06	0	Neuron
Fam173a	0	1.2565472453189994	0.378	0.115	0	Neuron
Magi3	0	1.4085680796483477	0.362	0.099	0	Neuron
Necab1	0	4.9185838394988455	0.273	0.01	0	Neuron
Shank1	0	2.6637891181748174	0.295	0.032	0	Neuron
Tcf25	0	0.7951849820768466	0.725	0.462	0	Neuron
Arhgap20	0	2.3824077233804317	0.299	0.037	0	Neuron
Armc9	0	1.5718076208706298	0.363	0.101	0	Neuron
Snhg20	0	1.2754094159558518	0.38	0.118	0	Neuron
Uggt2	0	1.5345075498524028	0.361	0.099	0	Neuron
Dock7	0	1.2021866674772201	0.395	0.134	0	Neuron
Pdhb	0	1.2293245946017048	0.372	0.111	0	Neuron
Pitpna	0	0.7610520775634343	0.45	0.189	0	Neuron
Ppp3r1	0	2.314249728320614	0.321	0.06	0	Neuron
Rimbp2	0	2.1947035433557867	0.32	0.059	0	Neuron
Sorbs2	0	0.698263	0.48	0.219	0	Neuron
Usp22	0	1.2619894407621008	0.366	0.105	0	Neuron
Arhgap44	0	2.5535757668517785	0.296	0.036	0	Neuron
Brwd1	0	0.7586943997461935	0.438	0.178	0	Neuron
Cstf3	0	0.7571834768126399	0.428	0.168	0	Neuron
Mdn1	0	1.9392333374448305	0.328	0.068	0	Neuron
Srpk1	0	1.2185338859523687	0.376	0.116	0	Neuron
Vps13c	0	1.4919216777817157	0.351	0.091	0	Neuron
Zscan26	0	1.0620440471138188	0.404	0.144	0	Neuron
Frmd4a	0	0.6129999072407968	0.573	0.313	0	Neuron
Dennd6b	0	2.6556658241152764	0.299	0.04	0	Neuron
Dgki	0	1.4827341222722836	0.347	0.088	0	Neuron
Eml2	0	1.083495917200673	0.386	0.127	0	Neuron
Inpp5f	0	0.934354	0.375	0.116	0	Neuron
Nub1	0	0.9388232603364285	0.403	0.144	0	Neuron
Taz	0	1.2528494837298918	0.372	0.113	0	Neuron
Unc79	0	1.9723324791892358	0.33	0.071	0	Neuron
Usp15	0	0.8637288102923109	0.415	0.156	0	Neuron
Vps41	0	0.818852	0.428	0.169	0	Neuron
Klhdc10	0	1.122148630594757	0.416	0.158	0	Neuron
Morf4l2	0	1.2562916901710892	0.381	0.123	0	Neuron
Slf2	0	1.214375004014168	0.387	0.129	0	Neuron
Ubr3	0	0.7869467160265425	0.438	0.18	0	Neuron
Gnai1	0	0.8413682806580887	0.377	0.12	0	Neuron
Grin2a	0	3.3642896966686844	0.288	0.031	0	Neuron
Prune2	0	1.2559208698985151	0.363	0.106	0	Neuron
Zfhx3	0	0.6045680138401133	0.475	0.218	0	Neuron
Mtmr7	0	2.9786362794165173	0.285	0.028	0	Neuron
Arhgap26	0	0.8858101033981093	0.421	0.165	0	Neuron
Habp4	0	2.5195427932618037	0.296	0.04	0	Neuron
Meaf6	0	1.5620152619322885	0.338	0.082	0	Neuron
Nkain3	0	3.4951245762318184	0.281	0.025	0	Neuron
Pigk	0	1.2790254202857334	0.364	0.108	0	Neuron
Ppme1	0	1.2657928996393166	0.36	0.104	0	Neuron
Srrt	0	0.9298414199076166	0.407	0.151	0	Neuron
Ywhab	0	1.747253442341096	0.489	0.233	0	Neuron
5330417C22Rik	0	4.857584967139043	0.265	0.01	0	Neuron
Mapk8	0	1.6293840081267736	0.326	0.071	0	Neuron
Nol4	0	0.7991806140182447	0.399	0.144	0	Neuron
Sez6l2	0	0.46890067279450104	0.37	0.115	0	Neuron
Sucla2	0	1.135701264824253	0.383	0.128	0	Neuron
Atp11b	0	1.3045986468434572	0.397	0.143	0	Neuron
Cacna2d3	0	2.638960675350281	0.301	0.047	0	Neuron
Dlat	0	1.0706186276586265	0.374	0.12	0	Neuron
Dnajc10	0	0.9424909992951381	0.405	0.151	0	Neuron
Grm8	0	4.221485346241042	0.27	0.016	0	Neuron
Otud7a	0	0.9385960475478834	0.428	0.174	0	Neuron
Stip1	0	0.8923270538129116	0.431	0.177	0	Neuron
Car11	0	2.0398594299719908	0.305	0.052	0	Neuron
Erc1	0	1.0110830872085428	0.391	0.138	0	Neuron
Fam120b	0	0.9792083634749134	0.39	0.137	0	Neuron
Gucy1a2	0	1.7671245751941753	0.327	0.074	0	Neuron
Klhl7	0	1.176239207317645	0.366	0.113	0	Neuron
Slc8a1	0	0.5619314043522393	0.393	0.14	0	Neuron
Rrp1	0	1.1238044164333294	0.534	0.282	0	Neuron
Gm28905	0	4.3183435531389645	0.269	0.017	0	Neuron
Nagk	0	1.4825282169792726	0.331	0.079	0	Neuron
Aff2	0	2.3481667882990553	0.299	0.048	0	Neuron
Atp6v1h	0	0.9668337596040344	0.381	0.13	0	Neuron
Chrm2	0	4.206633886836216	0.264	0.013	0	Neuron
Cyld	0	0.7702158305644567	0.405	0.154	0	Neuron
Inpp4b	0	1.3281680269635427	0.352	0.101	0	Neuron
Lonrf2	0	2.524423393858937	0.277	0.026	0	Neuron
Nrip3	0	3.9024612121407736	0.266	0.015	0	Neuron
Rgs7bp	0	0.7990729029148449	0.404	0.153	0	Neuron
Rims3	0	3.5932303631821823	0.267	0.016	0	Neuron
Sgtb	0	2.4871626462902756	0.286	0.035	0	Neuron
Sorcs3	0	1.7877247833105556	0.313	0.062	0	Neuron
Sult4a1	0	3.4047688080980616	0.269	0.018	0	Neuron
Tln2	0	1.4287345203105581	0.341	0.09	0	Neuron
Vps13a	0	1.1464330721921971	0.372	0.121	0	Neuron
Cplx2	0	2.1630418811011474	0.314	0.064	0	Neuron
Gm13629	0	4.422075922205374	0.263	0.013	0	Neuron
Kcnt2	0	2.9255730597255645	0.28	0.03	0	Neuron
Prkcg	0	4.048527314443856	0.263	0.013	0	Neuron
Astn2	0	0.8703218030826556	0.471	0.221	0	Neuron
Chic1	0	1.2183149087853757	0.349	0.099	0	Neuron
Ap2a2	0	1.2502586803716575	0.343	0.094	0	Neuron
Nmt2	0	0.9260174761123274	0.391	0.142	0	Neuron
1700025G04Rik	0	0.8647668678511206	0.354	0.105	0	Neuron
Cdh13	0	1.4994420338190606	0.359	0.11	0	Neuron
Ankrd55	0	4.937678302847257	0.258	0.01	0	Neuron
Nme7	0	1.8708182702871352	0.307	0.059	0	Neuron
Frmd3	0	3.1285209862759507	0.276	0.029	0	Neuron
Ip6k2	0	0.9655777317039984	0.388	0.141	0	Neuron
Slc6a17	0	3.966369514057275	0.263	0.016	0	Neuron
Tbce	0	1.2716149483951669	0.36	0.113	0	Neuron
Tmem145	0	3.4933418862272454	0.264	0.018	0	Neuron
0610010F05Rik	0	1.4305958231668683	0.331	0.085	0	Neuron
Gm26691	0	1.8449557716143157	0.314	0.068	0	Neuron
Nae1	0	1.1775125234574282	0.353	0.107	0	Neuron
Vezt	0	1.1270636124493865	0.359	0.113	0	Neuron
D130043K22Rik	0	2.5140442830701573	0.287	0.041	0	Neuron
Psma3	0	0.7881118923812589	0.408	0.162	0	Neuron
Eif4a2	0	1.3335895606305115	0.402	0.157	0	Neuron
Mrpl41	0	1.3562784966476613	0.337	0.092	0	Neuron
Setx	0	0.9512763019591596	0.398	0.153	0	Neuron
Chchd6	0	0.6467068468145102	0.378	0.133	0	Neuron
Dmxl2	0	1.5153834948400573	0.317	0.072	0	Neuron
Dync1li1	0	0.9864830580011263	0.359	0.114	0	Neuron
Hcn1	0	4.545247309258578	0.258	0.013	0	Neuron
Nme1	0	1.7081288760768514	0.368	0.123	0	Neuron
Ppm1a	0	1.1290256913336851	0.369	0.124	0	Neuron
Plekha5	0	1.070025101127947	0.415	0.17	0	Neuron
Lrrtm1	0	2.3343764461664613	0.279	0.035	0	Neuron
Necap1	0	2.510250620293806	0.281	0.037	0	Neuron
Tceal6	0	2.798221272371902	0.269	0.025	0	Neuron
1500011B03Rik	0	2.3978682398502515	0.287	0.043	0	Neuron
A830018L16Rik	0	2.893498327314067	0.287	0.043	0	Neuron
Cdadc1	0	1.0527834734822008	0.364	0.12	0	Neuron
Gm32647	0	4.8460448114459655	0.259	0.015	0	Neuron
Nvl	0	1.18738	0.365	0.121	0	Neuron
Tshz2	0	1.028329045836032	0.417	0.173	0	Neuron
Tubb5	0	1.5347194504266934	0.365	0.121	0	Neuron
Spryd3	0	2.2671582203348155	0.284	0.04	0	Neuron
Camk4	0	3.011038469199203	0.268	0.025	0	Neuron
Sept6	0	2.968054352908704	0.267	0.024	0	Neuron
Trerf1	0	1.6119914659526264	0.337	0.094	0	Neuron
Cxxc4	0	1.830714554874341	0.299	0.056	0	Neuron
Klhdc2	0	1.6172410179169787	0.309	0.066	0	Neuron
Scoc	0	1.5899852879763385	0.348	0.105	0	Neuron
Trpc5	0	3.485300609863421	0.264	0.022	0	Neuron
Ap1s2	0	2.356492822225071	0.308	0.066	0	Neuron
Mctp1	0	1.6599534777035874	0.298	0.056	0	Neuron
Tceal9	0	1.45776	0.382	0.14	0	Neuron
Wdr7	0	0.8719356202340403	0.37	0.128	0	Neuron
Cdh4	0	3.267312560085785	0.268	0.027	0	Neuron
Slc25a23	0	0.9920875769343296	0.392	0.151	0	Neuron
Abhd8	0	2.29822	0.284	0.043	0	Neuron
Ccnc	0	1.1927921040006535	0.352	0.111	0	Neuron
D430041D05Rik	0	1.856235182462176	0.301	0.06	0	Neuron
Gm42372	0	2.116340985507984	0.285	0.044	0	Neuron
Prkaca	0	1.8990510413735904	0.3	0.059	0	Neuron
Ccl27a	0	2.47023	0.278	0.038	0	Neuron
Rars2	0	1.3414082991982013	0.337	0.097	0	Neuron
Trappc6b	0	1.2094655569788866	0.331	0.091	0	Neuron
Adgrl2	0	2.203775902755155	0.287	0.047	0	Neuron
Clpp	0	0.9563158664826998	0.365	0.125	0	Neuron
Mapk8ip3	0	0.954376	0.367	0.127	0	Neuron
Mcts1	0	1.5520043204584277	0.308	0.068	0	Neuron
Tpi1	0	1.488290432465084	0.379	0.139	0	Neuron
Gm40841	0	3.167772470377265	0.261	0.022	0	Neuron
Rgs9	0	2.562234447796303	0.272	0.033	0	Neuron
Spata7	0	1.3778963028192333	0.335	0.096	0	Neuron
Izumo4	0	1.060674109752094	0.355	0.116	0	Neuron
Letm2	0	1.2830070529800555	0.353	0.114	0	Neuron
Snx32	0	0.9974646853693563	0.35	0.111	0	Neuron
Tuba4a	0	2.0248855209112797	0.282	0.043	0	Neuron
Dlk1	0	4.469807161885237	0.257	0.019	0	Neuron
Kcnj3	0	2.5486829648811975	0.271	0.033	0	Neuron
Fbxo9	0	1.7498876733139328	0.304	0.066	0	Neuron
Raph1	0	1.4267634052520306	0.315	0.077	0	Neuron
Scn2b	0	3.6919628908566278	0.251	0.013	0	Neuron
Zfp385b	0	4.349612375750989	0.25	0.012	0	Neuron
Cul2	0	1.2720999681641714	0.326	0.089	0	Neuron
Fam92a	0	1.2393876002794526	0.333	0.096	0	Neuron
Selenom	0	1.0169968825484825	0.394	0.157	0	Neuron
Timp2	0	1.3071828890708475	0.381	0.144	0	Neuron
4933406I18Rik	0	1.1656519852039695	0.303	0.066	0	Neuron
Acbd6	0	0.8686316696723148	0.377	0.14	0	Neuron
Plxnc1	0	1.9804300289343462	0.289	0.052	0	Neuron
Adarb1	0	2.3208314123839338	0.278	0.043	0	Neuron
Dab1	0	1.2386051360994301	0.457	0.222	0	Neuron
Klc2	0	2.908809075620681	0.261	0.026	0	Neuron
Vdac1	0	1.1523976164341154	0.39	0.155	0	Neuron
Sec24b	0	1.104533509439263	0.367	0.132	0	Neuron
Wdr47	0	1.6058848090116755	0.304	0.069	0	Neuron
Kcnq2	0	3.3754919164228165	0.253	0.019	0	Neuron
Nhs	0	3.6962853105358127	0.253	0.019	0	Neuron
Afdn	0	0.8823960945972972	0.367	0.133	0	Neuron
Cyp46a1	0	3.4622723337516312	0.251	0.017	0	Neuron
Dlg4	0	1.3799568825331336	0.315	0.081	0	Neuron
Lrrc49	0	1.1764117349062957	0.339	0.106	0	Neuron
Lin28b	0	2.9166085415015477	0.266	0.033	0	Neuron
Zfp692	0	1.5373145102951797	0.325	0.092	0	Neuron
Atp6v1e1	0	1.2255542329738522	0.431	0.198	0	Neuron
Atp9a	0	1.169614049369625	0.328	0.096	0	Neuron
Got2	0	1.389233931268998	0.31	0.078	0	Neuron
Gucy1b3	0	1.195194209139227	0.301	0.069	0	Neuron
H13	0	0.9287776558989638	0.355	0.123	0	Neuron
Prpf40b	0	1.1296638659523524	0.358	0.126	0	Neuron
AW551984	0	4.194964601040975	0.241	0.01	0	Neuron
Dcx	0	2.6598366048791213	0.259	0.029	0	Neuron
Magee1	0	2.3814095483556303	0.266	0.036	0	Neuron
Mapre3	0	1.137523006657112	0.329	0.099	0	Neuron
Sidt1	0	3.1394434085830634	0.252	0.022	0	Neuron
Slc2a3	0	2.400991033323381	0.265	0.035	0	Neuron
Ablim2	0	0.7891912834295056	0.348	0.118	0	Neuron
Cdk5	0	0.882265	0.352	0.122	0	Neuron
Dok6	0	1.3082901960536524	0.348	0.118	0	Neuron
Slc24a5	0	1.9214483712151347	0.284	0.054	0	Neuron
Etl4	0	3.0201873860052695	0.272	0.043	0	Neuron
Plxna4	0	1.1310738580529363	0.34	0.111	0	Neuron
Dgkg	0	3.5005444122168163	0.249	0.02	0	Neuron
Madd	0	2.109144334866963	0.268	0.039	0	Neuron
Mettl26	0	1.088693244237964	0.33	0.101	0	Neuron
Col25a1	0	3.432788069401946	0.242	0.013	0	Neuron
Hs6st3	0	3.2178551781917992	0.273	0.045	0	Neuron
Emc9	0	2.609630037479005	0.256	0.028	0	Neuron
Pcp4	0	3.253203620229916	0.266	0.038	0	Neuron
Reps2	0	1.8993947640031938	0.27	0.042	0	Neuron
Scn3b	0	2.3791854389515894	0.268	0.04	0	Neuron
Sugp1	0	1.210904938632043	0.344	0.116	0	Neuron
Calb1	0	1.5405851425483907	0.331	0.104	0	Neuron
Gm17276	0	2.232799615422187	0.28	0.053	0	Neuron
Mrps15	0	0.9869962273419265	0.335	0.108	0	Neuron
Hars	0	1.1694113825422776	0.326	0.099	0	Neuron
Tmie	0	2.200736062016743	0.265	0.038	0	Neuron
Cpt1c	0	1.6358442836757783	0.294	0.067	0	Neuron
Sept11	0	0.9636538445880781	0.31	0.083	0	Neuron
Mboat7	0	1.6203031579994487	0.28	0.054	0	Neuron
Fam169a	0	2.5154963023203303	0.252	0.026	0	Neuron
Fsd1	0	2.427447344015967	0.258	0.032	0	Neuron
Gm26848	0	2.513320400253172	0.268	0.042	0	Neuron
Gabarapl1	0	1.4591939650395553	0.407	0.181	0	Neuron
Pabpn1	0	1.0602585853950859	0.355	0.129	0	Neuron
Pip5k1b	0	1.5799659261065697	0.299	0.073	0	Neuron
Agtpbp1	0	1.0862826273190231	0.324	0.099	0	Neuron
Gpx3	0	3.156520287782867	0.253	0.028	0	Neuron
Scn8a	0	1.2181872106247766	0.317	0.092	0	Neuron
Pnma2	0	3.343565163776681	0.242	0.017	0	Neuron
Syt7	0	3.7246688971442126	0.241	0.016	0	Neuron
Gad1	0	3.401164147946447	0.248	0.024	0	Neuron
Rab3b	0	3.8687746962129888	0.24	0.016	0	Neuron
Epb41l4b	0	2.0674730643937815	0.269	0.046	0	Neuron
Stmn1	0	1.075893982321774	0.338	0.115	0	Neuron
Tomm70a	0	1.2759279632495095	0.317	0.094	0	Neuron
Tsnax	0	1.1753617697355694	0.319	0.096	0	Neuron
Mfsd6	0	1.424635705134027	0.292	0.069	0	Neuron
Mrap2	0	4.874583585180734	0.23	0.008	0	Neuron
Ndn	0	2.7057015901449533	0.3	0.078	0	Neuron
Nceh1	0	1.1543910313019075	0.313	0.092	0	Neuron
Cdkl2	0	1.3781820565854184	0.302	0.081	0	Neuron
Rnf150	0	1.7191009789726164	0.277	0.057	0	Neuron
Rpl22l1	0	1.2071921251602364	0.381	0.161	0	Neuron
Rundc3a	0	2.403508401423836	0.252	0.032	0	Neuron
Cmas	0	2.2726793409326134	0.253	0.034	0	Neuron
Pdcd7	0	2.6921219469202535	0.249	0.03	0	Neuron
Ppip5k1	0	1.6257942968693322	0.284	0.065	0	Neuron
Nbdy	0	2.004463751026969	0.265	0.047	0	Neuron
Dcaf12l1	0	2.364892381655018	0.249	0.031	0	Neuron
Ddx55	0	1.3428881608686662	0.307	0.089	0	Neuron
Gm20642	0	3.5605393623882122	0.242	0.024	0	Neuron
Mast2	0	1.2952216078111842	0.311	0.093	0	Neuron
Ap1s1	0	1.4489236431196806	0.29	0.072	0	Neuron
Cdk5r1	0	2.699100893976478	0.242	0.025	0	Neuron
Dhx57	0	1.1218133189079345	0.316	0.099	0	Neuron
Plppr2	0	2.83221	0.237	0.02	0	Neuron
Ctps2	0	1.5394637680510965	0.287	0.07	0	Neuron
Nkiras1	0	1.6038528859411794	0.284	0.067	0	Neuron
Atp5g1	0	1.1476487147492542	0.34	0.124	0	Neuron
Inpp4a	0	1.7718026712702244	0.271	0.055	0	Neuron
Ppa1	0	1.7185025077470615	0.273	0.057	0	Neuron
Rundc3b	0	1.6346989871081319	0.264	0.048	0	Neuron
Fbxw7	0	1.1508501590206794	0.31	0.094	0	Neuron
Aff3	0	1.7236954973461782	0.289	0.073	0	Neuron
B4galt6	0	1.5750341094213962	0.271	0.056	0	Neuron
Camk2n1	0	1.394399374516362	0.325	0.11	0	Neuron
Tpd52l1	0	1.2966631645656574	0.309	0.094	0	Neuron
Dctn1	0	1.3769331170808192	0.286	0.071	0	Neuron
Rnmt	0	1.5810685520723036	0.274	0.06	0	Neuron
Timm8b	0	1.3783056403438776	0.323	0.109	0	Neuron
Flot1	0	1.473426174872125	0.277	0.064	0	Neuron
Slc35f4	0	4.251662136381733	0.225	0.012	0	Neuron
Ptprr	0	1.9499559649693428	0.262	0.05	0	Neuron
Flnb	0	1.3098112715861312	0.31	0.098	0	Neuron
Trmt1	0	1.2980906349740764	0.302	0.09	0	Neuron
Afg3l2	0	1.3424389623978525	0.286	0.074	0	Neuron
Cers6	0	1.6840675003339247	0.271	0.06	0	Neuron
Dcaf7	0	1.364671310648684	0.285	0.074	0	Neuron
Wdr12	0	1.192343962424003	0.288	0.077	0	Neuron
Nsun7	0	1.7490896058963588	0.273	0.063	0	Neuron
Phlpp2	0	1.6531202410443728	0.267	0.057	0	Neuron
Rusc1	0	3.0538653032580503	0.229	0.019	0	Neuron
Ccdc28a	0	2.551770454008994	0.238	0.028	0	Neuron
Chrm3	0	4.399584773351097	0.221	0.011	0	Neuron
Tmx2	0	1.2475162002642506	0.307	0.097	0	Neuron
Dgke	0	1.972205035164969	0.256	0.047	0	Neuron
Nefm	0	3.2585196231992772	0.23	0.021	0	Neuron
2310061I04Rik	0	2.0026303562905587	0.251	0.042	0	Neuron
Stxbp5	0	1.3306442767816296	0.287	0.078	0	Neuron
Slc16a11	0	3.149748906691955	0.232	0.024	0	Neuron
Stx1b	0	2.417719199842251	0.237	0.029	0	Neuron
Asphd1	0	2.7566422009921263	0.229	0.022	0	Neuron
Nptxr	0	3.1907335479645367	0.23	0.023	0	Neuron
Rnf11	0	1.3710694958327188	0.274	0.067	0	Neuron
Pde4a	0	2.160694455995187	0.246	0.039	0	Neuron
Ypel4	0	3.6000034332465356	0.22	0.013	0	Neuron
Hs3st5	0	4.1189009337920615	0.22	0.014	0	Neuron
Phf24	0	3.9715120996779625	0.216	0.01	0	Neuron
Fbxo41	0	2.8040707959942215	0.231	0.026	0	Neuron
Lmtk3	0	2.6985432721128153	0.231	0.026	0	Neuron
Mir124-2hg	0	1.6315995497333229	0.257	0.052	0	Neuron
A530058N18Rik	0	4.8965466530133135	0.212	0.007	0	Neuron
Lrp11	0	2.1640785453752307	0.237	0.032	0	Neuron
Cnksr2	0	1.520598334488973	0.283	0.078	0	Neuron
Usp5	0	1.2275430534488616	0.282	0.077	0	Neuron
Zmym3	0	1.803848017747726	0.256	0.052	0	Neuron
Dapk1	0	1.3111653091129105	0.286	0.082	0	Neuron
Btbd11	0	2.306466491790533	0.241	0.038	0	Neuron
Gabra5	0	3.7890531763164073	0.216	0.013	0	Neuron
Hdac3	0	1.2480083399868669	0.284	0.081	0	Neuron
Mrps26	0	1.2069792660707788	0.285	0.082	0	Neuron
Arf3	0	1.2824789460201176	0.274	0.072	0	Neuron
Kcnj9	0	4.247368630020484	0.21	0.008	0	Neuron
Ap1b1	0	1.2833726750030356	0.266	0.065	0	Neuron
Ddx25	0	2.637745545625665	0.223	0.022	0	Neuron
Farsb	0	1.37344	0.263	0.062	0	Neuron
Gda	0	2.832488104916408	0.233	0.032	0	Neuron
Hpcal1	0	2.7712781432939466	0.232	0.031	0	Neuron
Ctxn2	0	4.305489220636543	0.209	0.008	0	Neuron
Dcun1d4	0	1.5226749974576492	0.257	0.057	0	Neuron
Plekha6	0	1.59388	0.259	0.059	0	Neuron
Plekhb2	0	1.7096265734509177	0.25	0.05	0	Neuron
Slc32a1	0	4.2573167412270845	0.212	0.012	0	Neuron
Thsd7b	0	2.667828267378656	0.237	0.037	0	Neuron
Tmem150c	0	3.7477614459718405	0.212	0.012	0	Neuron
Bmyc	0	1.2121129520174687	0.274	0.075	0	Neuron
Jazf1	0	2.012287003093792	0.254	0.055	0	Neuron
Rac3	0	2.7633315916312915	0.218	0.019	0	Neuron
Samd5	0	2.996024782778782	0.218	0.019	0	Neuron
Sh3glb2	0	1.461849046410693	0.265	0.066	0	Neuron
Zfr2	0	1.6387539752130567	0.257	0.058	0	Neuron
Dpysl5	0	3.915329369170862	0.211	0.012	0	Neuron
Ube2o	0	1.8920924970011221	0.24	0.041	0	Neuron
Unc13a	0	3.6081724956302432	0.213	0.014	0	Neuron
Fxyd7	0	2.8225466382262465	0.221	0.023	0	Neuron
Kcnj6	0	3.394438317319358	0.214	0.016	0	Neuron
Mrpl38	0	1.312517604208831	0.263	0.065	0	Neuron
Stx3	0	2.6412800508903884	0.23	0.032	0	Neuron
Sergef	0	2.2310498790709614	0.236	0.038	0	Neuron
Tuba1b	0	1.3512191335046255	0.411	0.214	0	Neuron
Vwc2l	0	4.21023	0.209	0.012	0	Neuron
Clmp	0	2.9282554314429166	0.211	0.015	0	Neuron
Dgkh	0	1.5108307159642307	0.259	0.063	0	Neuron
Greb1l	0	3.318191017803402	0.218	0.022	0	Neuron
9530059O14Rik	0	1.278886536221533	0.237	0.041	0	Neuron
Akap17b	0	1.5510195120998114	0.255	0.06	0	Neuron
Rtl4	0	1.5530171350680444	0.257	0.062	0	Neuron
Sdk1	0	2.1794562326597973	0.241	0.046	0	Neuron
Slc45a1	0	3.155694432933206	0.211	0.016	0	Neuron
Tmem181a	0	1.653795401839749	0.26	0.065	0	Neuron
B230334C09Rik	0	2.8688791217153384	0.213	0.019	0	Neuron
Fabp3	0	3.6896269396303794	0.203	0.009	0	Neuron
Gm44644	0	3.1995888575813396	0.209	0.015	0	Neuron
Vwa5b2	0	4.315034634163616	0.203	0.009	0	Neuron
Arhgdig	0	2.1899387743229717	0.228	0.035	0	Neuron
Slc6a7	0	5.021571719170687	0.2	0.007	0	Neuron
Ass1	0	2.449647504443297	0.217	0.025	0	Neuron
Eef1a2	0	3.1242093095423997	0.207	0.015	0	Neuron
Glra3	0	4.930884713182901	0.198	0.006	0	Neuron
Mcfd2	0	1.6948704984828384	0.241	0.049	0	Neuron
Pcdh19	0	1.860809366879774	0.238	0.046	0	Neuron
Slc35g2	0	2.847026645908976	0.21	0.018	0	Neuron
Cdh7	0	2.8110216317947154	0.218	0.027	0	Neuron
Cygb	0	2.8592744540190376	0.21	0.019	0	Neuron
Mtus2	0	1.84548	0.244	0.053	0	Neuron
Tcea2	0	3.010326582223294	0.211	0.02	0	Neuron
Tram1l1	0	1.8247027599555161	0.232	0.041	0	Neuron
Aldoa	0	1.2263224556591112	0.471	0.28	0	Neuron
Ccdc82	0	1.4511029487198162	0.251	0.061	0	Neuron
Gnaz	0	2.067703072288307	0.226	0.036	0	Neuron
Nrn1	0	5.2494985233307645	0.195	0.005	0	Neuron
Prr16	0	1.8980598778480666	0.249	0.059	0	Neuron
Ajap1	0	2.7916424103842137	0.207	0.018	0	Neuron
Ece2	0	3.2393635911740852	0.206	0.017	0	Neuron
Iqsec3	0	4.020899233666255	0.201	0.012	0	Neuron
Snx16	0	1.7828365333990885	0.234	0.045	0	Neuron
Tspyl1	0	1.556441113234293	0.252	0.063	0	Neuron
Atp13a2	0	1.6766322316741742	0.233	0.045	0	Neuron
Lin7b	0	4.234632796539537	0.195	0.007	0	Neuron
Xkr6	0	1.7241774420620042	0.25	0.062	0	Neuron
Cpne5	0	4.36861	0.196	0.009	0	Neuron
Mast1	0	3.539052409363408	0.201	0.014	0	Neuron
Mcf2l	0	1.7780078789805311	0.232	0.045	0	Neuron
Mest	0	2.94529	0.205	0.018	0	Neuron
Ppp1r1a	0	1.6841479959961354	0.231	0.044	0	Neuron
Psd	0	3.140616270970371	0.204	0.017	0	Neuron
Rwdd2a	0	3.6569631602326576	0.199	0.012	0	Neuron
4930555F03Rik	0	3.962564964501885	0.202	0.016	0	Neuron
Cnnm1	0	2.7930690913871015	0.207	0.021	0	Neuron
Fstl4	0	2.364131292391777	0.229	0.043	0	Neuron
Prlr	0	4.4981599906952825	0.195	0.009	0	Neuron
Fbxl16	0	3.1567009629827076	0.198	0.013	0	Neuron
Gabra4	0	1.900070608779128	0.225	0.04	0	Neuron
Hook2	0	1.9081844224412658	0.23	0.045	0	Neuron
Slc6a15	0	2.890044235571433	0.206	0.021	0	Neuron
Sptbn2	0	3.4460923534499335	0.2	0.015	0	Neuron
Cib2	0	1.948287478010462	0.222	0.038	0	Neuron
Clvs2	0	3.8479022194471537	0.194	0.01	0	Neuron
Slc25a22	0	3.0182999658521945	0.2	0.016	0	Neuron
Cdkl1	0	2.6747431547132585	0.205	0.022	0	Neuron
Fam241b	0	2.595771746912996	0.205	0.022	0	Neuron
Slit1	0	4.108830558533204	0.192	0.009	0	Neuron
Spryd7	0	1.5924807672739443	0.233	0.05	0	Neuron
Trim32	0	1.874054780258609	0.216	0.033	0	Neuron
Ar	0	3.1504355150677985	0.198	0.016	0	Neuron
Creld1	0	1.7459155698398798	0.224	0.042	0	Neuron
Frmpd3	0	3.9558349271118853	0.196	0.014	0	Neuron
Pld5	0	3.0536229062640934	0.206	0.024	0	Neuron
Flywch2	0	2.8914462066354156	0.199	0.018	0	Neuron
Slc35f3	0	2.7920085819738194	0.205	0.024	0	Neuron
Wdr18	0	1.7246869010501884	0.224	0.043	0	Neuron
Ccdc92	0	2.167192283572216	0.21	0.03	0	Neuron
Plxna2	0	1.7635731014254417	0.226	0.046	0	Neuron
5730522E02Rik	0	2.22265	0.212	0.033	0	Neuron
Epha10	0	4.580824892127245	0.186	0.007	0	Neuron
Ppfia3	0	2.9920675089901505	0.195	0.016	0	Neuron
Carmil3	0	3.1163308186875014	0.195	0.017	0	Neuron
Fndc9	0	2.893144766300429	0.194	0.016	0	Neuron
Gdap1l1	0	2.252360819969271	0.204	0.026	0	Neuron
Ogfrl1	0	1.59954	0.219	0.041	0	Neuron
St6galnac5	0	1.9996859862251788	0.208	0.03	0	Neuron
C1qtnf4	0	2.0167720028744047	0.213	0.036	0	Neuron
Caln1	0	1.8587371178178964	0.219	0.042	0	Neuron
Emb	0	2.015175524959552	0.205	0.028	0	Neuron
Oprm1	0	4.034538760532461	0.187	0.01	0	Neuron
Rnf208	0	2.2132412033047357	0.206	0.029	0	Neuron
Ubap1l	0	5.080969414116733	0.182	0.005	0	Neuron
Pcnx2	0	3.640045988879682	0.188	0.012	0	Neuron
B230217C12Rik	0	2.099801590533597	0.203	0.028	0	Neuron
Sh3bp1	0	2.6526363316459367	0.193	0.018	0	Neuron
Ecel1	0	4.55216	0.182	0.008	0	Neuron
Fam189a1	0	2.135145486630063	0.21	0.036	0	Neuron
Asns	0	2.4633465940003636	0.195	0.022	0	Neuron
Cnih2	0	2.8108215245640635	0.189	0.016	0	Neuron
Shank3	0	2.585896990724873	0.202	0.03	0	Neuron
Lrfn2	0	2.8241813338724353	0.193	0.022	0	Neuron
Kctd16	0	2.2545676704573205	0.208	0.037	0	Neuron
Arntl2	0	3.1633552021953473	0.188	0.018	0	Neuron
AI504432	0	2.864957301426854	0.187	0.017	0	Neuron
Klhl1	0	4.262163471324813	0.181	0.011	0	Neuron
A330008L17Rik	0	3.7321307705908717	0.183	0.014	0	Neuron
Ankrd13d	0	2.2123074107189815	0.196	0.028	0	Neuron
Lynx1	0	2.4645475718846637	0.193	0.025	0	Neuron
1700037H04Rik	0	2.4635619489247453	0.188	0.021	0	Neuron
Fam69b	0	2.3584614625218645	0.187	0.02	0	Neuron
Ndst3	0	2.6899499113592906	0.194	0.027	0	Neuron
Cplx1	0	3.5922194716809313	0.178	0.011	0	Neuron
Rab15	0	3.6397852229205476	0.175	0.008	0	Neuron
Pkib	0	3.315652144878426	0.18	0.014	0	Neuron
Lrrc3b	0	3.789359527209042	0.175	0.01	0	Neuron
Rab9b	0	3.565662172499648	0.175	0.01	0	Neuron
Fam57b	0	2.529157788741178	0.186	0.022	0	Neuron
Ppp4r4	0	2.3526645326753175	0.187	0.024	0	Neuron
Slit3	0	3.2034645478544137	0.181	0.018	0	Neuron
Cacng3	0	4.847528098459363	0.167	0.005	0	Neuron
Cpne4	0	4.058940173664053	0.171	0.01	0	Neuron
Fcho1	0	2.829552207747394	0.178	0.018	0	Neuron
Hs3st4	0	4.167966904460473	0.169	0.009	0	Neuron
Mal2	0	4.42656	0.165	0.006	0	Neuron
Rps6kl1	0	2.687382487012786	0.176	0.017	0	Neuron
Gm30382	0	4.875686902290498	0.163	0.006	0	Neuron
Gm44643	0	3.2366362005294045	0.169	0.012	0	Neuron
Tmem169	0	2.9015709682122246	0.173	0.016	0	Neuron
Rab26	0	4.250054735631814	0.163	0.007	0	Neuron
Glra2	0	4.399384084535728	0.162	0.007	0	Neuron
Nrgn	0	3.811602686672482	0.167	0.012	0	Neuron
Bsn	0	3.4084597131058545	0.167	0.013	0	Neuron
Cntnap5c	0	3.8475577480594083	0.164	0.01	0	Neuron
Gm26905	0	4.715756863019425	0.161	0.007	0	Neuron
Gprin3	0	3.6955001611994054	0.162	0.008	0	Neuron
Hpcal4	0	3.139358052323489	0.168	0.014	0	Neuron
Cacna1g	0	4.464203993584163	0.159	0.006	0	Neuron
Smim18	0	4.648436747084768	0.157	0.005	0	Neuron
Pgr	0	4.242131744236794	0.158	0.007	0	Neuron
Sim1	0	4.8728	0.156	0.006	0	Neuron
Mtfp1	5.724575367316856e-308	2.7825964007714603	0.173	0.017	1.4359524851377602e-303	Neuron
B3galnt1	7.349449152271798e-308	2.162487093658883	0.185	0.022	1.843535825355858e-303	Neuron
Lingo1	1.1648388853177402e-307	1.6897475162979503	0.21	0.037	2.9218818599310196e-303	Neuron
Adgra1	1.4844076355129002e-307	0.9511453026101011	0.329	0.11	3.723488112920559e-303	Neuron
Pick1	1.751922278757405e-307	1.2337195671634718	0.287	0.084	4.3945218440350744e-303	Neuron
Prkar2b	5.3211734579525726e-307	1.77925	0.208	0.036	1.3347631501928232e-302	Neuron
Il1rapl2	6.938056910759644e-307	3.7250111683745493	0.173	0.018	1.740342195494949e-302	Neuron
Nucb2	8.575693810661538e-307	1.8049959836970533	0.215	0.04	2.1511270354663402e-302	Neuron
Chfr	1.5298638169413577e-306	1.1424491368760954	0.323	0.111	3.837510398415702e-302	Neuron
Elovl4	1.6549582388879376e-306	1.5214672526151094	0.232	0.05	4.1512972464265025e-302	Neuron
Stub1	1.6666212431977892e-306	0.916505	0.405	0.169	4.1805527264373345e-302	Neuron
Ttc14	1.6043018102709262e-305	0.6411625104437044	0.579	0.295	4.024230660883591e-301	Neuron
Lhfpl4	1.628863949906048e-305	1.284523741087535	0.27	0.075	4.085842331944331e-301	Neuron
Apba1	1.8264380693969289e-305	0.8651454269316174	0.351	0.127	4.581437253275256e-301	Neuron
Chst1	2.1683001724211732e-305	1.2291246107472333	0.236	0.051	5.438964152501271e-301	Neuron
Atp6v0d1	2.2417539152760623e-305	0.8357641044741254	0.422	0.179	5.623215521078475e-301	Neuron
Nrd1	4.643330911457702e-305	0.6895695660727414	0.495	0.229	1.16473312583005e-300	Neuron
Slc39a6	9.004253602316786e-305	1.3842534091091079	0.247	0.06	2.2586269736051425e-300	Neuron
Gm9866	1.4529990707424742e-304	3.8477323906459455	0.155	0.008	3.644702869050422e-300	Neuron
Chd6	1.6103408908491776e-304	0.5664073318584824	0.607	0.312	4.039379090606077e-300	Neuron
Gls2	2.1865799683497138e-304	4.065333412441197	0.153	0.007	5.484817192608422e-300	Neuron
Krt222	2.2652434302944296e-304	2.8927760894690073	0.166	0.014	5.682136620550547e-300	Neuron
Miga1	3.5694644067434696e-304	1.1465234399480688	0.294	0.09	8.953644517875319e-300	Neuron
Ankrd17	1.3866596532467715e-303	0.6468599496434373	0.474	0.212	3.4782970742042017e-299	Neuron
Gabbr1	2.8470215012228507e-303	0.735387	0.455	0.204	7.141468733667399e-299	Neuron
Hspa12a	3.5093122041614393e-303	1.9364971650136562	0.202	0.034	8.802758732918554e-299	Neuron
Higd1a	7.39078050493864e-303	1.3607589097624322	0.246	0.06	1.8539033818588085e-298	Neuron
Tspoap1	9.04990545551554e-303	1.8078505599982282	0.23	0.052	2.270078284461518e-298	Neuron
Far1	1.0916488242898283e-302	0.8281237523926617	0.372	0.14	2.7382919108486053e-298	Neuron
Slit2	1.740199930646608e-302	1.2593225804834782	0.279	0.084	4.365117506033952e-298	Neuron
Vwc2	6.522987358864939e-302	1.9958212492423983	0.198	0.032	1.6362261490976812e-297	Neuron
Scfd1	6.803576725247998e-302	0.8018986711997889	0.375	0.143	1.7066091857612077e-297	Neuron
Sdr39u1	2.5154986099106277e-301	1.9471371090084695	0.197	0.032	6.309876713099819e-297	Neuron
Lrpprc	3.717126432450778e-301	1.106488926134722	0.289	0.087	9.324039943159531e-297	Neuron
Ica1l	1.0361975700955592e-300	2.4688845506057455	0.179	0.021	2.599197984827701e-296	Neuron
Tnrc6c	1.130795326162074e-300	0.7245679364050829	0.486	0.229	2.8364869961449467e-296	Neuron
Gmcl1	1.1511159688982362e-300	1.1195931609209748	0.297	0.094	2.8874592963843356e-296	Neuron
Sh2d5	1.376133666378852e-300	4.087332825670539	0.151	0.007	3.451893688744712e-296	Neuron
Cdk14	1.3834973497655403e-300	0.6655923625727406	0.489	0.229	3.4703647521518814e-296	Neuron
Chchd4	1.398285325387483e-300	1.4895127324785853	0.225	0.047	3.5074589102019627e-296	Neuron
Tcte2	1.48216942104002e-300	1.9465110100231278	0.218	0.045	3.7178737757367863e-296	Neuron
Cap2	1.5634705464086358e-300	0.703479	0.353	0.124	3.921809518611422e-296	Neuron
Neto2	2.3126217909157994e-300	2.109404422930683	0.194	0.03	5.800980500333191e-296	Neuron
Foxp2	5.017768766169352e-300	3.110410584777026	0.177	0.022	1.2586571173059204e-295	Neuron
Rpp21	6.201368389936941e-300	1.1666381276398434	0.268	0.074	1.5555512469317825e-295	Neuron
Lrrtm2	7.61601284555909e-300	1.314230678578601	0.237	0.054	1.910400662180042e-295	Neuron
Dtnb	2.1581558421917451e-299	1.0149321305237964	0.341	0.124	5.413518114553773e-295	Neuron
Cryzl1	2.7323418305856935e-299	0.8136309973421657	0.366	0.139	6.853806247841154e-295	Neuron
Coro2a	4.167484690645194e-299	2.5497484890868702	0.169	0.016	1.0453718598014405e-294	Neuron
Gars	6.526385816480719e-299	1.2879323302484313	0.249	0.063	1.6370786182060236e-294	Neuron
Nova1	7.271862009525738e-299	0.7630369566716716	0.384	0.15	1.8240738664694362e-294	Neuron
Atp6v0e2	1.0745315362109889e-298	1.1108411004926342	0.349	0.135	2.6953549054316443e-294	Neuron
Adarb2	1.513150720754008e-298	1.5338462070305092	0.271	0.079	3.795587267939353e-294	Neuron
Glt1d1	2.4066821158172697e-297	2.7857159285487163	0.17	0.017	6.036921419316039e-293	Neuron
Syt3	2.9565342150134374e-297	2.6289089701080766	0.17	0.017	7.416170424939706e-293	Neuron
Nedd4l	4.5312863671875214e-297	0.881379	0.366	0.14	1.136627872345318e-292	Neuron
Peg10	1.9710248747070636e-296	3.0736257129762237	0.173	0.02	4.944118795715199e-292	Neuron
Terf2ip	1.9959632986953588e-296	1.4609988756678411	0.235	0.055	5.006674338447438e-292	Neuron
Gm12709	2.242804934454593e-296	2.6511625503695075	0.171	0.018	5.625851897585901e-292	Neuron
Sorcs1	2.9361125447079354e-296	1.0537341618137248	0.355	0.139	7.364944707145385e-292	Neuron
Mtif2	3.550518583355078e-296	0.7118296841850071	0.397	0.159	8.906120814487878e-292	Neuron
Flrt3	3.9898095355587315e-296	1.731543812476466	0.21	0.039	1.0008038238995522e-291	Neuron
Gpr45	1.7770755993099898e-295	1.9342889769090126	0.199	0.034	4.457616433309179e-291	Neuron
Tmem126b	3.217067466852386e-295	1.3615567664436905	0.244	0.061	8.069692033852525e-291	Neuron
Tmem63c	1.2998737485122967e-294	3.5507981285957384	0.155	0.01	3.260603310768245e-290	Neuron
Fbxo10	2.8249567570160235e-294	1.8287656468872915	0.208	0.039	7.086121529298994e-290	Neuron
Hpca	3.6948915298382816e-294	4.178650196860434	0.149	0.007	9.268265913446346e-290	Neuron
Ripor2	3.8764686720112436e-294	1.2658998052241746	0.278	0.084	9.723734016873003e-290	Neuron
Lrrc24	5.788548944908233e-294	2.3291503938537454	0.175	0.021	1.451999617340781e-289	Neuron
Rrnad1	6.389852709484104e-294	1.071481675198654	0.346	0.13	1.6028306536469928e-289	Neuron
Mrps5	8.965537751450145e-294	0.756444	0.395	0.159	2.2489154895737542e-289	Neuron
Arhgap6	1.1172062563529493e-293	1.9036919297488917	0.242	0.064	2.802400173435738e-289	Neuron
Srr	1.120394455083358e-293	0.8193618618457988	0.356	0.134	2.810397451131095e-289	Neuron
Coprs	1.501545761747833e-293	1.69558	0.215	0.044	3.766477388768264e-289	Neuron
Abca5	3.052077497711907e-293	1.703415156257797	0.214	0.044	7.655831195260548e-289	Neuron
Pcbd1	4.472652995838296e-293	2.1468798526596804	0.188	0.029	1.1219202774760781e-288	Neuron
Uchl3	6.667097297942122e-293	0.9767060310875249	0.272	0.077	1.672374686215802e-288	Neuron
Lsamp	1.0482761642722249e-292	0.23593648121761746	0.938	0.6	2.629495930460449e-288	Neuron
Sacs	1.2668403076390649e-292	1.9316013752590675	0.191	0.03	3.1777422276818305e-288	Neuron
Fam216a	2.6315452554538963e-292	0.8769106299974194	0.309	0.102	6.600968118780554e-288	Neuron
Bzw2	2.9821429456234687e-292	1.0979436291030675	0.283	0.086	7.480407364801908e-288	Neuron
Pdss1	4.265070772702418e-292	1.6954143581781944	0.229	0.053	1.0698503526246745e-287	Neuron
Slc25a14	9.050378940017843e-292	1.910902424824735	0.193	0.031	2.2701970533140756e-287	Neuron
Slitrk4	1.6734017968720134e-291	2.6222462483045788	0.163	0.015	4.1975610672737587e-287	Neuron
Tmem38a	2.5559666448504113e-291	1.4426225863860997	0.229	0.052	6.411386731942772e-287	Neuron
Gm9801	1.6013335655230774e-290	1.7552061116208741	0.222	0.049	4.0167851157580876e-286	Neuron
Pitpnm1	2.0161675103982218e-290	1.636069284983066	0.224	0.05	5.057354583082899e-286	Neuron
Ydjc	1.2060901294702706e-289	2.9003992077792122	0.158	0.013	3.0253564807632267e-285	Neuron
Atrnl1	1.352624775595589e-289	1.4925888465849086	0.26	0.075	3.3929239871039755e-285	Neuron
Nova2	5.1503652309587375e-289	1.7898614863301479	0.215	0.046	1.2919176145336897e-284	Neuron
Ice1	5.151591756219321e-289	1.3017699473984223	0.258	0.071	1.2922252761300544e-284	Neuron
Slc9a7	6.255305949342976e-289	2.066978296196046	0.19	0.03	1.5690809443331922e-284	Neuron
Flot2	8.350220604608106e-289	1.1274405817087836	0.263	0.073	2.0945693364598976e-284	Neuron
Ndufaf5	9.298366068461163e-289	2.0338956029476387	0.183	0.026	2.3324021446127982e-284	Neuron
Rnf214	2.787273412668446e-288	0.7331234475076498	0.354	0.132	6.991596628337531e-284	Neuron
Ano5	2.9017501920988608e-288	4.499875897239936	0.144	0.006	7.278750181860783e-284	Neuron
Tmem246	4.893393443340488e-288	1.0183984143063203	0.275	0.081	1.227458811327528e-283	Neuron
Dync2h1	9.809277578621881e-288	0.6908651923001881	0.446	0.196	2.4605591878215124e-283	Neuron
Fam19a2	2.3545467971091837e-287	1.722620119619108	0.212	0.043	5.906145185868677e-283	Neuron
Usp45	2.8237441827860225e-287	1.016874149224909	0.299	0.098	7.083079908100459e-283	Neuron
Mgst3	3.7331292262128086e-287	2.0153642004279573	0.193	0.033	9.36418135103221e-283	Neuron
Adgrb3	4.2111659552949226e-287	0.27870041062939066	0.745	0.427	1.0563288682261783e-282	Neuron
Armcx5	1.1537038997509825e-286	1.8272122956204793	0.2	0.036	2.8939508621353646e-282	Neuron
Rtl1	1.3625405914866256e-286	4.574237711813902	0.141	0.005	3.4177968196850516e-282	Neuron
Arpp21	1.980511325482012e-286	1.0035635657831838	0.345	0.131	4.967914608839079e-282	Neuron
Clasp1	3.0885989613723023e-286	0.7710049042565034	0.359	0.136	7.747441634706284e-282	Neuron
Phactr1	4.624941354443329e-286	0.7219695647825504	0.492	0.243	1.1601202893485646e-281	Neuron
Zmym6	6.658142771787313e-286	1.4031664767552647	0.262	0.076	1.6701285328751295e-281	Neuron
Tbc1d24	7.709053325104532e-286	1.5645006087545221	0.22	0.049	1.933738936069221e-281	Neuron
Ube2w	1.2810229192887759e-285	0.8296250850216594	0.321	0.111	3.213317890743965e-281	Neuron
Bcat1	1.282263852882084e-285	1.7581277671781734	0.187	0.029	3.21643064856942e-281	Neuron
Kif2a	2.4681303206187155e-285	0.7074315270672022	0.39	0.158	6.191058096239986e-281	Neuron
Ngb	3.6322998228365e-285	3.6985028660590107	0.149	0.009	9.111260875603077e-281	Neuron
Tmem196	3.795073215508388e-285	1.542690509847523	0.205	0.039	9.51956165378124e-281	Neuron
Grid1	6.3215065821017476e-285	0.9514300658706807	0.371	0.151	1.5856867110544023e-280	Neuron
Chchd7	6.891221137913251e-285	1.3189792959012971	0.252	0.069	1.72859391023416e-280	Neuron
Apbb1	7.125149754844097e-285	0.8679625514221896	0.32	0.111	1.7872725645050933e-280	Neuron
2010204K13Rik	1.0775294948820865e-284	1.7605248174836108	0.209	0.043	2.702874984962226e-280	Neuron
Gtpbp4	1.5887674180336326e-284	0.770005	0.352	0.134	3.985264191395564e-280	Neuron
Tomm40	2.7585386786753565e-284	0.852844	0.344	0.128	6.919518421589264e-280	Neuron
Nipal2	2.866864299835015e-284	1.2493972768431545	0.266	0.078	7.191242409706151e-280	Neuron
Dynll2	2.979966818330547e-284	1.443570414981259	0.365	0.176	7.474948767100344e-280	Neuron
Gm5441	3.797095520585419e-284	2.050179040010736	0.19	0.032	9.524634403836465e-280	Neuron
Lysmd4	6.33612364792068e-284	0.6274301371162401	0.323	0.112	1.5893532558444233e-279	Neuron
Me3	6.546129377328595e-284	1.8694949211521834	0.21	0.044	1.6420310930091049e-279	Neuron
Rnf157	7.31999344313198e-284	1.270851635520901	0.254	0.07	1.8361471552752256e-279	Neuron
Arpc5l	1.0743234508098897e-283	1.014877501595082	0.304	0.103	2.694832944011527e-279	Neuron
Shisa9	1.1856635672828363e-283	0.9672392000261362	0.296	0.095	2.9741184921722665e-279	Neuron
Armc8	1.8013188529305818e-283	0.8820890516065875	0.313	0.107	4.5184282106910714e-279	Neuron
Fus	2.171428206824158e-283	0.6175061128784065	0.737	0.435	5.446810513997717e-279	Neuron
Nrip2	2.371546051836036e-283	2.5515702074415287	0.157	0.013	5.948786116425513e-279	Neuron
Smim13	2.4531395368520294e-283	1.3253711122085672	0.235	0.058	6.15345521423963e-279	Neuron
Zyg11b	3.231643989471551e-283	0.7143559546908487	0.359	0.137	8.106255783190439e-279	Neuron
Lyrm9	3.6104676858827273e-283	2.062956007914173	0.183	0.028	9.056497143268233e-279	Neuron
Aff4	4.962287411144727e-283	0.54901	0.514	0.246	1.2447401742115434e-278	Neuron
Gm26906	5.41586310334425e-283	4.356720241721206	0.144	0.007	1.3585151008428717e-278	Neuron
Tm2d3	7.430268051404847e-283	1.1503185006892989	0.285	0.091	1.8638084380143917e-278	Neuron
Spink10	1.0357831180581338e-282	2.2239288506762405	0.184	0.029	2.5981583733370227e-278	Neuron
Dnajc27	2.107547926867849e-282	1.3965289884559224	0.228	0.054	5.286573219755313e-278	Neuron
D030068K23Rik	2.1208980242911523e-282	2.1158250568032195	0.2	0.039	5.3200606041319264e-278	Neuron
Simc1	3.397040916089194e-282	1.4386864453978496	0.237	0.06	8.521137433918134e-278	Neuron
Pacs1	4.16375618619348e-282	1.0553578769405603	0.271	0.081	1.0444366017447726e-277	Neuron
Klhl22	4.583424223494369e-282	1.220522111408397	0.248	0.066	1.1497061322213276e-277	Neuron
Ppp1r13b	4.6716321800889826e-282	1.4540420178622804	0.222	0.051	1.1718322160535205e-277	Neuron
Ric8b	1.0351305386486624e-281	1.1389295633495158	0.254	0.07	2.5965214431463046e-277	Neuron
Abi2	1.1524184147146471e-281	0.6166725096997245	0.406	0.169	2.890726351470221e-277	Neuron
A230004M16Rik	1.1758554407836014e-281	3.621387969962157	0.149	0.01	2.9495157876615856e-277	Neuron
Ddx50	1.6782100874336557e-281	0.6598961430113003	0.434	0.188	4.209622183318582e-277	Neuron
Serinc1	2.0140163744124046e-281	0.8612979800260439	0.554	0.353	5.051958673576076e-277	Neuron
Rerg	2.314154373371693e-281	4.011027778327534	0.145	0.008	5.804824830165555e-277	Neuron
Wrb	5.873665433966736e-281	1.3617986831722724	0.233	0.058	1.473350237456216e-276	Neuron
Epm2aip1	6.542334353610857e-281	1.3322651387790354	0.248	0.067	1.6410791492597475e-276	Neuron
Osbp2	1.9297891619866975e-280	2.476973875887575	0.166	0.019	4.840683133927432e-276	Neuron
Jakmip3	3.3371561298868144e-280	1.6378823960819906	0.196	0.036	8.370922436208085e-276	Neuron
Trim37	3.839504358469602e-280	0.5323853195964943	0.438	0.189	9.631012732785149e-276	Neuron
Bag4	4.1057213917305093e-280	1.2064380391155722	0.237	0.059	1.029879153901681e-275	Neuron
Nap1l1	4.647386230137044e-280	0.7125614499748536	0.401	0.17	1.1657503619675762e-275	Neuron
Fhod3	1.021962821271675e-279	1.3863107001023915	0.238	0.062	2.5634915408778698e-275	Neuron
Cenpv	2.7962830778009577e-279	1.198415404007187	0.274	0.085	7.014196472355922e-275	Neuron
Nob1	5.169754032477574e-279	1.0281227707798557	0.309	0.107	1.2967811015066748e-274	Neuron
Inafm1	1.4336778535622484e-278	2.397550165003042	0.172	0.023	3.596237527875544e-274	Neuron
Lrrn3	1.869020540638731e-278	1.236139150722711	0.224	0.052	4.688251124138193e-274	Neuron
Bclaf1	3.782610171750231e-278	0.49604942501176996	0.655	0.364	9.48829935481828e-274	Neuron
Tub	7.027411649922274e-278	1.9846656689953064	0.185	0.03	1.7627559382665033e-273	Neuron
Ank1	1.029434971479164e-277	2.74782	0.167	0.021	2.582234682458335e-273	Neuron
Psmd1	1.270684837657797e-277	0.5472333813869361	0.5	0.237	3.1873858467808184e-273	Neuron
Dusp26	2.2551047876838902e-277	0.6419610503935705	0.354	0.135	5.65670484942627e-273	Neuron
Gm45846	2.400404597369764e-277	1.1533194249734608	0.277	0.088	6.021174892042316e-273	Neuron
Tcf20	2.5920465169832835e-277	0.9060887213301649	0.328	0.12	6.501889483200868e-273	Neuron
Anapc4	2.6466431467578043e-277	1.061154576993666	0.29	0.096	6.638839669327276e-273	Neuron
Tox2	8.58930641045305e-277	0.9513949028103761	0.263	0.075	2.154541619998043e-272	Neuron
Smim14	1.507660301660359e-276	0.6095035124739744	0.418	0.179	3.781815100684845e-272	Neuron
Hjurp	2.459335771766504e-276	1.0437249479424358	0.3	0.102	6.168997849899098e-272	Neuron
Rell2	5.571641150734444e-276	3.9099939091241103	0.14	0.007	1.3975904662502278e-271	Neuron
Gspt2	1.1918873457248986e-275	2.057107935756331	0.172	0.023	2.989730218016336e-271	Neuron
Comtd1	3.131635079305811e-275	2.303306933835194	0.161	0.017	7.855393432930697e-271	Neuron
Fam131a	4.664579187875737e-275	1.6261124002225555	0.193	0.035	1.17006304348675e-270	Neuron
Nrp2	5.1090158500908237e-275	1.2523071095307892	0.253	0.073	1.2815455358367823e-270	Neuron
Dus3l	5.403941675002456e-275	1.6570079349073752	0.214	0.048	1.355524729757616e-270	Neuron
Zfp512	6.100476706018282e-275	0.8917588269279123	0.316	0.112	1.5302435769376257e-270	Neuron
Trhde	9.492773313756102e-275	2.5270753339516223	0.194	0.039	2.3811672580225807e-270	Neuron
Ptchd1	2.515586886617496e-274	3.8214234548429107	0.144	0.009	6.310098146391327e-270	Neuron
Ssx2ip	9.131279221473962e-274	1.4088973262201128	0.223	0.054	2.2904900799145285e-269	Neuron
Zc2hc1a	1.0331450211574621e-273	0.7176015798593447	0.349	0.132	2.591540971071378e-269	Neuron
Vgf	1.1947696295555757e-273	4.645711023034357	0.138	0.006	2.996960138777206e-269	Neuron
Odf2	1.2327440696645677e-273	0.6306662192844115	0.468	0.219	3.092215224346602e-269	Neuron
Yme1l1	1.5663328436980714e-273	0.5844966009453312	0.449	0.203	3.928989305132242e-269	Neuron
AI593442	2.1333924321426044e-273	3.2341489036176325	0.147	0.011	5.351401576786509e-269	Neuron
Pdp1	2.446471570073609e-273	3.1062683439567857	0.149	0.012	6.136729286372641e-269	Neuron
Thyn1	3.3860937176265445e-273	1.0692859663454153	0.258	0.075	8.493677481294424e-269	Neuron
Grin3a	8.222215863520076e-273	0.7461388572542667	0.357	0.141	2.0624606272053757e-268	Neuron
Sdha	1.2542011185159919e-272	0.577046	0.493	0.236	3.146038085685514e-268	Neuron
Cdip1	4.002537125700411e-272	0.5714022429931321	0.425	0.184	1.0039964126106912e-267	Neuron
Gm38393	5.371183359794105e-272	2.188081351362166	0.166	0.021	1.3473076339707532e-267	Neuron
Arhgap24	6.259393732608245e-272	1.070233948850738	0.267	0.082	1.5701063238874523e-267	Neuron
Ppp1r11	8.690754519961108e-272	1.0561153345799048	0.296	0.101	2.1799888637870442e-267	Neuron
Hk1	1.0617507578955824e-271	0.7996827974092576	0.314	0.11	2.6632956011052788e-267	Neuron
Begain	5.77889492056019e-271	4.078933392496529	0.139	0.007	1.4495780018733181e-266	Neuron
Fam49b	8.330524898446918e-271	0.3847267977085312	0.427	0.183	2.089628865526425e-266	Neuron
Focad	1.3320195522522006e-270	1.5166153030212697	0.217	0.051	3.3412378448694196e-266	Neuron
Ndufv2	2.236268785070836e-270	0.8400970971944955	0.449	0.224	5.609456620471685e-266	Neuron
Zfp445	2.6710910979337317e-270	0.5982107935794605	0.448	0.204	6.700164910056972e-266	Neuron
B4galnt4	3.0385266073826325e-270	3.407258836835932	0.148	0.012	7.621840141958595e-266	Neuron
Pfdn1	4.593151321281916e-270	0.6675683766310643	0.386	0.161	1.1521460774303557e-265	Neuron
Clasrp	4.770461792788473e-270	0.98298	0.33	0.126	1.1966226361030605e-265	Neuron
AC166352.1	7.1505323134861225e-270	1.3321235413852381	0.214	0.048	1.7936395255148589e-265	Neuron
Ocrl	1.3057597986442575e-269	0.6876389980475504	0.359	0.14	3.2753678789192555e-265	Neuron
Tmem25	1.4564519990117045e-269	3.253211662703586	0.149	0.012	3.6533641943209596e-265	Neuron
Tceal3	1.4969508879859387e-269	0.8288198968741755	0.395	0.175	3.754951607423929e-265	Neuron
Wscd2	2.044850812023826e-269	3.721914716049221	0.142	0.009	5.129303776880565e-265	Neuron
5730455P16Rik	5.468510518392928e-269	0.7447788547711722	0.343	0.132	1.371721178433682e-264	Neuron
Pfdn4	2.0756466500815258e-268	1.3113437942017523	0.229	0.058	5.206552057064499e-264	Neuron
Nhsl2	2.1232254690355282e-268	1.8196779846343456	0.194	0.038	5.325898766528719e-264	Neuron
C78859	2.3525155297649298e-268	4.700608394413633	0.133	0.004	5.90104995486235e-264	Neuron
Auts2	3.122857542740766e-268	0.5065603931385672	0.546	0.28	7.833375860210937e-264	Neuron
Bcl11a	9.223801386342342e-268	4.1903236179338545	0.137	0.007	2.313698339750113e-263	Neuron
Bbs5	3.209706136570634e-267	1.4979608299862677	0.223	0.056	8.051226872973777e-263	Neuron
Gfra4	6.067188726030665e-267	3.299609340705184	0.14	0.008	1.521893620037532e-262	Neuron
Kcnh1	1.0258450080534656e-266	3.0830282780104326	0.153	0.016	2.573229618201313e-262	Neuron
Zim1	1.3276374672342918e-266	3.8731309986452995	0.137	0.007	3.3302458228104973e-262	Neuron
Pnisr	1.3376245953072367e-266	0.45749731119218584	0.886	0.609	3.3552975348686727e-262	Neuron
Ppp3ca	2.099102694240999e-266	0.5072982331880995	0.697	0.422	5.265389198234122e-262	Neuron
Grem2	3.112491713063211e-266	4.164815275338621	0.133	0.005	7.807374213047758e-262	Neuron
Gm45323	3.346603604111042e-266	3.511124709142143	0.145	0.012	8.394620480552138e-262	Neuron
Dnajb4	6.589632779839909e-266	0.7708912520912187	0.317	0.114	1.652943486495043e-261	Neuron
Gm20275	8.583431378754376e-266	0.9217606606446447	0.318	0.118	2.1530679270467474e-261	Neuron
Sec23a	1.0861062990949994e-265	1.037263335525534	0.257	0.076	2.7243890406498964e-261	Neuron
Prmt1	1.5915052847068673e-265	1.1107805132181063	0.263	0.081	3.992131856158706e-261	Neuron
Camk1	4.4839624495659524e-265	0.6507426433805819	0.338	0.127	1.1247571408491235e-260	Neuron
Myl12b	8.366201605861767e-265	0.8495410022168197	0.43	0.217	2.0985780108143656e-260	Neuron
Tma7	8.580628111276619e-265	1.0118216666585946	0.294	0.102	2.152364755432627e-260	Neuron
Parm1	9.75039639225868e-265	1.7201372073450836	0.204	0.045	2.445789431034167e-260	Neuron
Ipo9	1.4270444939540738e-264	1.1251098850157915	0.265	0.083	3.5795984086343984e-260	Neuron
Herc2	4.781888897019228e-264	0.5378951023791032	0.44	0.197	1.1994890109283032e-259	Neuron
Runx1t1	5.897233922338065e-264	1.0580933545698623	0.273	0.087	1.47926215707928e-259	Neuron
Dda1	5.980055492259872e-264	1.1453611707647906	0.244	0.069	1.5000371196784664e-259	Neuron
Atxn2l	6.2530838454666246e-264	0.8544571275492083	0.329	0.124	1.568523551796848e-259	Neuron
Phyhip	1.0802890646137944e-263	2.9629	0.147	0.013	2.709797089677242e-259	Neuron
Pdcd4	1.247853818854056e-263	0.5262849575649406	0.434	0.198	3.1301165192135143e-259	Neuron
Map2k1	1.618444720762651e-263	0.725073	0.34	0.13	4.059706737561034e-259	Neuron
Smap2	1.8017914386653204e-263	0.44445	0.345	0.132	4.51961364474809e-259	Neuron
Mbd5	1.8632578588099575e-263	0.6628858538631774	0.477	0.237	4.6737960130388974e-259	Neuron
Cgref1	1.9886811914929184e-263	3.210102130550558	0.14	0.009	4.9884079007408365e-259	Neuron
Ssr4	2.338920057125237e-263	0.7822264493984231	0.355	0.143	5.866947071292944e-259	Neuron
Rabgap1l	3.974186002012304e-263	0.461378	0.541	0.272	9.968848167447663e-259	Neuron
Pithd1	6.169707574004638e-263	1.0851419705022456	0.262	0.081	1.5476094478633234e-258	Neuron
Tenm3	6.697187184410417e-263	1.076385955680699	0.417	0.2	1.679922433337509e-258	Neuron
Srek1	1.5909865234008896e-262	0.5468854837988968	0.562	0.292	3.9908305952987916e-258	Neuron
Agk	2.607706266116666e-262	1.2908105481588836	0.23	0.061	6.541170397927045e-258	Neuron
Shd	2.861644538617344e-262	1.4791205152861289	0.206	0.046	7.178149160667746e-258	Neuron
Alk	4.0055060801976113e-262	2.1711148688566047	0.192	0.04	1.0047411451567688e-257	Neuron
Mapk9	6.929993830305485e-262	0.7278576045112328	0.319	0.118	1.738319652393828e-257	Neuron
Senp7	1.0616590753465878e-261	0.651777	0.42	0.186	2.6630656245993806e-257	Neuron
Sf3b1	1.2145490158899413e-261	0.500916	0.657	0.368	3.046574751458329e-257	Neuron
Rabl6	1.5663001106545492e-261	0.468951	0.53	0.263	3.928907197565871e-257	Neuron
Txnl1	2.1862644600819296e-261	0.8418870079310299	0.339	0.134	5.484025771669512e-257	Neuron
Cirbp	3.199491316238235e-261	0.7673317180309884	0.32	0.118	8.025604017651989e-257	Neuron
Arl16	3.8359658318915915e-261	1.374413498143467	0.206	0.046	9.622136692716868e-257	Neuron
Plcxd2	7.549438389060731e-261	3.049093983877614	0.14	0.01	1.8937011255119938e-256	Neuron
Timm17a	7.728600938274791e-261	0.9823053089000762	0.294	0.103	1.9386422593568484e-256	Neuron
Enox1	8.874913094055724e-261	0.787703	0.308	0.114	2.2261832005129376e-256	Neuron
P3h3	9.613216145068406e-261	1.5756181836555252	0.223	0.058	2.4113791378289592e-256	Neuron
Tiprl	1.1599427951941117e-260	0.8377558549608954	0.275	0.089	2.9096005074649097e-256	Neuron
Cacna1d	1.9837712377217797e-260	0.7086488383324345	0.423	0.194	4.976091772701312e-256	Neuron
Pcgf6	2.6796061192640267e-260	1.684644613769408	0.204	0.046	6.721523989561884e-256	Neuron
Grina	2.6846049011293205e-260	0.630741	0.421	0.19	6.734062933992787e-256	Neuron
6430548M08Rik	3.970900396155771e-260	2.134076109688227	0.164	0.022	9.960606553717136e-256	Neuron
Pfdn2	5.500370035318819e-260	0.9803872571221839	0.322	0.125	1.3797128196593725e-255	Neuron
Nyap1	4.5429324502523155e-259	3.019627180891481	0.142	0.011	1.1395491758212908e-254	Neuron
Slc25a11	5.492182793881718e-259	0.9216374396539215	0.281	0.094	1.3776591320172902e-254	Neuron
Zfyve9	6.063059975262337e-259	0.6823614765468423	0.386	0.165	1.5208579641948047e-254	Neuron
Glra1	6.190798397463663e-259	4.095954325968693	0.135	0.008	1.5528998700197852e-254	Neuron
Nup88	7.017920873549036e-259	1.1167398814423481	0.255	0.078	1.76037527192104e-254	Neuron
Fam189b	7.300847676180894e-259	2.6323709209557418	0.159	0.021	1.8313446310932157e-254	Neuron
Gm26782	9.283444721896792e-259	1.4152967387521471	0.209	0.049	2.3286592740405913e-254	Neuron
Ikbkap	1.7559964583287097e-258	1.222423031372627	0.24	0.069	4.4047415160717355e-254	Neuron
Gpr162	1.7993989274365724e-258	2.1383367173539884	0.154	0.017	4.513612269581898e-254	Neuron
Psmc6	1.991194906418903e-258	0.5729468935582601	0.374	0.155	4.994713303261176e-254	Neuron
Hdx	3.3113567444921007e-258	2.3963626940349467	0.158	0.02	8.306207257883986e-254	Neuron
Emc4	5.707128675604366e-258	1.0804516638267283	0.262	0.083	1.4315761569885994e-253	Neuron
Scrn1	1.2260366863884315e-257	0.7299878206514304	0.323	0.121	3.0753904241367416e-253	Neuron
Fbxl20	2.116023177132888e-257	0.8112643901062764	0.36	0.15	5.307832537520136e-253	Neuron
Mkl2	2.2886317669650002e-257	1.0029783301561852	0.311	0.117	5.740803924255006e-253	Neuron
Rnf165	3.005447485507975e-257	2.910914438496741	0.144	0.013	7.538864472648204e-253	Neuron
Srrm1	3.2196455972938964e-257	0.48682974977262417	0.725	0.43	8.07615901625201e-253	Neuron
Osbpl8	4.005772857660326e-257	0.715787	0.305	0.108	1.0048080636155162e-252	Neuron
Hypk	4.521438656286642e-257	1.2565197579176641	0.235	0.066	1.1341576725429413e-252	Neuron
Cdc7	7.920388705918761e-257	2.507075798589253	0.155	0.018	1.9867503029926621e-252	Neuron
Ccdc112	1.0014344002937001e-256	1.397855441942746	0.214	0.053	2.5119980496967174e-252	Neuron
Srp72	1.0565404104799409e-256	0.6050883885109625	0.404	0.177	2.650225965647884e-252	Neuron
Fbxo25	1.1060799493006881e-256	1.285967031730099	0.21	0.05	2.774490944825846e-252	Neuron
Dip2c	1.3059730078888182e-256	0.842344	0.396	0.184	3.2759026929883116e-252	Neuron
Cdc123	1.5753676132312341e-256	0.7223914384330182	0.365	0.152	3.951652121029228e-252	Neuron
Ggps1	1.9090407236171176e-256	0.6341818747491209	0.369	0.152	4.788637751121177e-252	Neuron
Epha4	3.5896989255792957e-256	1.3737732561137879	0.217	0.055	9.004400784923104e-252	Neuron
Usp13	4.267136100690144e-256	2.008358118198187	0.171	0.027	1.0703684194971159e-251	Neuron
Ergic1	4.997657754253553e-256	0.9971817282296763	0.245	0.071	1.2536124710769612e-251	Neuron
Guf1	1.186349090595898e-255	1.3257233901232028	0.238	0.069	2.9758380588507505e-251	Neuron
Actr10	1.823140889442764e-255	0.6943879425332926	0.317	0.118	4.57316660707823e-251	Neuron
Gm2516	1.843205664007893e-255	3.601746193599361	0.14	0.011	4.6234970875973985e-251	Neuron
Acsl4	2.396317442603117e-255	0.8871366947908522	0.257	0.077	6.010922673025658e-251	Neuron
Elp2	2.6717896577937507e-255	0.780648	0.309	0.112	6.701917177609844e-251	Neuron
Rasgef1b	1.301018364709167e-254	1.4490360905939728	0.217	0.056	3.2634744660364744e-250	Neuron
Btbd10	1.9514676679762836e-254	0.8528330456803846	0.284	0.096	4.89506149835171e-250	Neuron
Gm20604	3.2410168055819042e-254	2.156333414617948	0.156	0.019	8.129766555121649e-250	Neuron
Parp6	3.4598199504654336e-254	1.2146560974057432	0.22	0.056	8.678612363747493e-250	Neuron
2210408F21Rik	4.09440962239555e-254	0.9017682737663569	0.258	0.08	1.0270417096816997e-249	Neuron
Gm45321	4.381906458771753e-254	3.6375592989931866	0.138	0.01	1.0991574161183064e-249	Neuron
Chordc1	4.881900802976131e-254	0.7254291774973878	0.348	0.14	1.2245759974185327e-249	Neuron
Lztr1	6.519313252773278e-254	1.1222286785770754	0.256	0.08	1.635304536325649e-249	Neuron
Trp53i11	9.414728033301616e-254	2.722067780922515	0.144	0.013	2.3615903798733774e-249	Neuron
Nxph1	1.7664330351138514e-253	0.5401409074414734	0.298	0.104	4.430920625279585e-249	Neuron
Sez6	2.5527712071638515e-253	1.5669402029261557	0.197	0.043	6.403371296049805e-249	Neuron
Cep19	3.640804069313098e-253	0.8815562839939912	0.253	0.077	9.132592927464976e-249	Neuron
Olfm2	4.022794725898936e-253	0.6289183741142943	0.236	0.063	1.0090778290444891e-248	Neuron
Rap1gap2	6.206840268903722e-253	1.6118364618744163	0.189	0.038	1.5569238130518097e-248	Neuron
2310033P09Rik	7.695086682860867e-253	1.0517944612913253	0.246	0.073	1.93023554352882e-248	Neuron
Far2	8.451188111409224e-253	1.8144577229812766	0.184	0.036	2.11989602586589e-248	Neuron
Igf2bp3	1.2400782539610663e-252	0.9547823450787167	0.296	0.106	3.1106122922359386e-248	Neuron
Smyd3	1.600980507343352e-252	0.906257	0.345	0.145	4.015899504620064e-248	Neuron
Jpt1	1.6156955541874512e-252	1.0601338153819617	0.239	0.068	4.052810728123802e-248	Neuron
Hsph1	3.657131013444755e-252	0.7605172226702619	0.386	0.174	9.173547434124823e-248	Neuron
Mrnip	4.254297598215189e-252	2.5978032231643606	0.15	0.017	1.067148009536298e-247	Neuron
Zmym1	6.215390793950342e-252	2.2321864504188698	0.162	0.024	1.5590686267545038e-247	Neuron
Lamtor4	6.479019791742438e-252	0.8633549701617474	0.277	0.093	1.6251973245606732e-247	Neuron
Huwe1	7.067862851193574e-252	0.5425568152757027	0.515	0.259	1.772902717593396e-247	Neuron
Lrrn2	7.532327082185669e-252	1.1959607463658566	0.218	0.055	1.889408925295453e-247	Neuron
Slc25a3	7.675357376897314e-252	0.7905907992601152	0.492	0.271	1.925286644420922e-247	Neuron
Scai	1.0325672410640375e-251	0.7963496981566778	0.334	0.133	2.5900916674850316e-247	Neuron
B630019K06Rik	1.243625128305553e-251	3.328393294203223	0.137	0.01	3.119509271841649e-247	Neuron
Ttc33	1.9966713412538128e-251	1.3228867269744784	0.214	0.054	5.008450392401064e-247	Neuron
Nenf	2.0323152083463983e-251	1.1139706600990253	0.335	0.141	5.0978594686161057e-247	Neuron
Tsc1	3.2490259522072928e-251	0.8626563569190082	0.302	0.109	8.149856698516774e-247	Neuron
Pcsk1	8.42753019598056e-251	3.954070832614135	0.13	0.007	2.1139616743597635e-246	Neuron
Hivep2	9.801449161461726e-251	0.6906693320958002	0.406	0.184	2.458595507661059e-246	Neuron
Lhfpl5	1.692343638872261e-250	3.869126126208192	0.127	0.005	4.24507478374718e-246	Neuron
Rtf1	5.285560412391808e-250	0.5444841802032561	0.482	0.241	1.325829973844361e-245	Neuron
Sltm	5.3107556201362595e-250	0.41460834131081215	0.678	0.387	1.3321499397549794e-245	Neuron
Ttll11	8.294729509164129e-250	2.119439268795497	0.175	0.032	2.08064995007873e-245	Neuron
Kidins220	9.304016276877078e-250	0.46172675682933373	0.573	0.299	2.333819442891846e-245	Neuron
Faf1	1.314136703627462e-249	0.7368561568114602	0.359	0.15	3.296380507379126e-245	Neuron
Idh3g	1.4797516913213358e-249	0.6272538923866973	0.347	0.139	3.711809142510439e-245	Neuron
Tubg2	1.9394373758770854e-249	3.486204680374241	0.131	0.008	4.864884713650081e-245	Neuron
Cdh9	2.7106504595606305e-249	4.066590835492761	0.128	0.006	6.799395612761886e-245	Neuron
Luc7l2	5.326293376717591e-249	0.47548724743838244	0.769	0.489	1.3360474306158404e-244	Neuron
Cttnbp2	6.900652647896225e-249	0.5596579888826474	0.376	0.158	1.730959710198289e-244	Neuron
Arfgap1	1.456024967791814e-248	0.8640136718411001	0.272	0.089	3.652293029208986e-244	Neuron
Tmem63b	5.845883174292007e-248	0.6619458613213316	0.324	0.122	1.466381335439407e-243	Neuron
Slc30a9	7.810129942911309e-248	0.6925946842683689	0.367	0.156	1.9590929948798727e-243	Neuron
Slf1	8.38428198883709e-248	0.6676661628568419	0.372	0.159	2.1031132940798954e-243	Neuron
Hdac2	1.6444157078841883e-247	0.8767504850183755	0.273	0.092	4.124852361656698e-243	Neuron
Prmt7	1.8025221636940003e-247	1.1694360348035526	0.227	0.063	4.5214465954100304e-243	Neuron
Mtss1	1.9010593198044736e-247	0.575453	0.337	0.131	4.768617197797541e-243	Neuron
Gnl2	2.197218741441915e-247	0.7674857157491488	0.342	0.139	5.5115034910329e-243	Neuron
Tsr2	2.403210382683645e-247	1.3816262477417376	0.202	0.048	6.028212923923655e-243	Neuron
Tmem30a	3.886391482839061e-247	0.7722307912070592	0.477	0.261	9.7486243955535e-243	Neuron
Usp9x	5.2964812997069136e-247	0.6745993904973835	0.344	0.138	1.3285693692184821e-242	Neuron
Cpsf6	7.300109091622803e-247	0.6406626090533969	0.4	0.177	1.831159364542664e-242	Neuron
Rcan3	7.581640973537415e-247	1.5197543343960627	0.183	0.036	1.9017788218021254e-242	Neuron
Prkcz	8.042594528916577e-247	0.5924546286391521	0.313	0.116	2.0174044116334343e-242	Neuron
Vps9d1	8.124237545770725e-247	1.3101870404393585	0.222	0.06	2.037883745981129e-242	Neuron
Ric3	2.1648408052215694e-246	0.8269413287166175	0.269	0.088	5.430286675817784e-242	Neuron
Nop10	2.662427189837542e-246	0.9600532449969579	0.321	0.129	6.678432362988491e-242	Neuron
Rgs2	3.848730362757497e-246	0.9425307470276669	0.225	0.061	9.654155241940906e-242	Neuron
Kcnmb2	4.268672864163498e-246	3.8965808287107713	0.131	0.008	1.0707539012467719e-241	Neuron
Dhx30	7.242621045241703e-246	0.5831432505800012	0.396	0.174	1.816739062988429e-241	Neuron
Uba5	7.656459453164391e-246	0.7116006467540522	0.317	0.121	1.9205462892317557e-241	Neuron
Vstm5	8.058685337916382e-246	2.2263712406360394	0.151	0.019	2.0214406301629453e-241	Neuron
Htr7	1.7789393065855256e-245	4.359407144919563	0.123	0.004	4.462291356639133e-241	Neuron
Csnk1g1	3.2488871238248156e-245	0.7743044388077476	0.336	0.136	8.149508461402167e-241	Neuron
Krit1	5.2748952635619675e-245	0.5569941241782517	0.425	0.196	1.3231547279118838e-240	Neuron
Zfp280d	6.207921944823234e-245	0.6979686730313971	0.376	0.163	1.55719514063946e-240	Neuron
Sgsm2	6.544029491142269e-245	1.3426468242297114	0.223	0.062	1.6415043575581267e-240	Neuron
Cct8	8.922815296567539e-245	0.8338467904020028	0.355	0.154	2.2381989889910015e-240	Neuron
Ppargc1b	1.039021501505184e-244	2.3732662800513555	0.152	0.02	2.6062815343756036e-240	Neuron
Dnaja2	2.278337549153651e-244	0.7016606356219877	0.38	0.169	5.714981908297018e-240	Neuron
Celsr3	3.3533128915014795e-244	4.951320417619684	0.122	0.004	8.411450057042311e-240	Neuron
Ppm1l	5.3309108147925117e-244	0.7007856192000407	0.285	0.099	1.3372056687825537e-239	Neuron
Sacm1l	7.770421133873271e-244	0.7562549248223025	0.295	0.107	1.9491324372207712e-239	Neuron
Sub1	1.801003547957041e-243	0.9359768554370698	0.404	0.206	4.517637299695442e-239	Neuron
Golga7b	3.165317198173483e-243	3.4934140250433314	0.127	0.007	7.939881659898365e-239	Neuron
Galnt9	3.6331689171464456e-243	4.54743	0.122	0.004	9.113440911770143e-239	Neuron
Mapre2	8.66540022812764e-243	0.4194920265213538	0.43	0.194	2.173628993223537e-238	Neuron
Abhd16a	1.1532606111695652e-242	0.8449781538502059	0.286	0.102	2.8928389170577374e-238	Neuron
Ptpro	2.0984680012570766e-242	1.1487941194356899	0.229	0.066	5.263797134353251e-238	Neuron
Cntnap1	2.6186197034687635e-242	3.087280236807303	0.136	0.012	6.568545664181046e-238	Neuron
Ncs1	5.712667193221327e-242	1.7559428304181295	0.175	0.033	1.4329654387476377e-237	Neuron
Dzip1	6.187850665428885e-242	0.8301748664448204	0.314	0.121	1.5521604609161816e-237	Neuron
Ints10	6.356891842347842e-242	1.1188145081794911	0.247	0.078	1.5945627497345326e-237	Neuron
Syt17	2.0720423172997555e-241	2.8722984072452786	0.134	0.011	5.197510948714707e-237	Neuron
Rb1cc1	5.324614670436625e-241	0.45308238382852395	0.522	0.266	1.335626343932323e-236	Neuron
Gpr22	8.267655934415723e-241	4.2758	0.12	0.004	2.07385881458884e-236	Neuron
Slc4a1ap	1.13751691752622e-240	0.7820408649382556	0.285	0.101	2.8533474359227704e-236	Neuron
Tbc1d9	1.1670637017852848e-240	1.273606448251735	0.185	0.038	2.9274625895582086e-236	Neuron
Radil	1.2487122666520365e-240	2.201723326977689	0.166	0.029	3.1322698496699685e-236	Neuron
Lig1	1.33064509097279e-240	1.489370360152388	0.192	0.044	3.337790146196146e-236	Neuron
Agap3	1.586545844332119e-240	1.2760247543271643	0.207	0.053	3.979691595922687e-236	Neuron
Tspyl5	1.9810522808830554e-240	1.8997234874280664	0.161	0.025	4.969271541367056e-236	Neuron
Dpm2	2.2009363350846366e-240	1.022451129806306	0.238	0.072	5.520828702926303e-236	Neuron
Nfu1	3.2240544177068304e-240	0.7930024531813968	0.27	0.091	8.087218101375813e-236	Neuron
Gramd1a	3.6512091382481136e-240	1.2419409310289704	0.215	0.057	9.158693002381568e-236	Neuron
Spint2	5.341093435455778e-240	1.372734152368921	0.217	0.059	1.3397598773497275e-235	Neuron
Cnr1	7.172586678357692e-240	3.5462053673753724	0.127	0.008	1.7991716423992433e-235	Neuron
Senp2	7.572402952618045e-240	0.5620355284115298	0.366	0.155	1.8994615566347105e-235	Neuron
Isl1	8.731809675607264e-240	4.109808144154248	0.125	0.007	2.190287139029326e-235	Neuron
Slc7a6	9.69406576748193e-240	1.8834457975022216	0.172	0.032	2.4316594571151672e-235	Neuron
Dnttip1	1.0642783319224695e-239	1.3321805736747911	0.226	0.066	2.6696357677943224e-235	Neuron
Zfp239	1.7568074666480129e-239	1.4884311535939374	0.184	0.039	4.406775849339875e-235	Neuron
Rabgap1	1.8827176215106421e-239	0.4341786486655943	0.526	0.269	4.722608881797295e-235	Neuron
Psmc4	2.1726928533460523e-239	0.6151759860358079	0.333	0.133	5.449982753333238e-235	Neuron
Glmn	2.518362691532095e-239	0.9744775228093645	0.243	0.074	6.317060975439108e-235	Neuron
Map1a	3.4547238048600943e-239	0.5658575794828995	0.389	0.174	8.66582919211106e-235	Neuron
Abcc5	5.181874732121623e-239	0.525926	0.459	0.22	1.299821457805388e-234	Neuron
Ndufaf7	5.604020837508792e-239	0.7224306586424568	0.336	0.137	1.4057125868807054e-234	Neuron
Lrpap1	7.350097501706756e-239	0.8711518884329142	0.375	0.171	1.8436984573281228e-234	Neuron
Pzp	8.779867964404222e-239	1.3843825920999402	0.201	0.049	2.202342080191155e-234	Neuron
Rab27a	9.124529831320682e-239	2.120384278437049	0.148	0.019	2.28879706288848e-234	Neuron
Hnrnph1	1.1663910182127078e-238	0.51524	0.43	0.2	2.9257752300847564e-234	Neuron
Dopey1	4.6009515438118005e-238	0.9530512608832644	0.32	0.131	1.154102685249752e-233	Neuron
Trpv2	4.9760487913114906e-238	2.2759231097789674	0.143	0.016	1.2481920788125743e-233	Neuron
Nwd2	5.687813198630592e-238	4.550174439325794	0.123	0.006	1.4267310627444977e-233	Neuron
Mrpl3	6.994538667440411e-238	1.1574998243421017	0.237	0.073	1.7545100793407528e-233	Neuron
Timm44	1.5577681828813177e-237	0.8254411424950983	0.308	0.119	3.9075057099394976e-233	Neuron
Tmem199	2.0327161429934128e-237	1.229519954968303	0.206	0.052	5.098865173084677e-233	Neuron
Syndig1	2.9427277205180547e-237	1.6208351529506064	0.182	0.039	7.381538214147489e-233	Neuron
Arid4a	3.046623229736221e-237	0.37727835991467873	0.517	0.263	7.642149709470337e-233	Neuron
Fam110b	3.4977198971739516e-237	1.184499698138774	0.209	0.054	8.77368059007114e-233	Neuron
Bcas2	3.5171768445984785e-237	0.7479891158153991	0.327	0.132	8.822486396990823e-233	Neuron
Ube2b	3.824452739023007e-237	0.5585636410340863	0.46	0.232	9.593257250565312e-233	Neuron
Ankrd34b	5.104126375996007e-237	3.45218	0.124	0.007	1.2803190601548382e-232	Neuron
Cenpc1	7.194035850718179e-237	0.705481	0.304	0.114	1.804551952794148e-232	Neuron
Gm10419	9.845764013795652e-237	1.8766415338235025	0.169	0.031	2.4697114452205014e-232	Neuron
Rab3gap1	1.3142146534821842e-236	0.5866731713622005	0.349	0.143	3.2965760367947106e-232	Neuron
Ccl25	1.4130637962171918e-236	0.9230910896707228	0.277	0.098	3.5445292264312035e-232	Neuron
Mcph1	1.6791596194068703e-236	1.5368234513594194	0.182	0.038	4.212003989320194e-232	Neuron
Vat1	2.345659240575312e-236	1.7587989785850673	0.177	0.037	5.8838516390591126e-232	Neuron
Erp29	3.2108666168575515e-236	0.807748	0.357	0.155	8.054137821725482e-232	Neuron
Dlx6os1	3.316063569592463e-236	4.7378319822187525	0.121	0.005	8.318013857965734e-232	Neuron
Epb41	4.15441459099428e-236	0.9777083075691453	0.253	0.083	1.0420933560050053e-231	Neuron
Mapk1	4.476126087691933e-236	0.49576533455722266	0.409	0.184	1.1227914678366445e-231	Neuron
Stx1a	5.313132901913084e-236	1.9274333643361399	0.155	0.023	1.3327462571158782e-231	Neuron
Patj	1.0995609024337978e-235	1.9606191320424742	0.178	0.038	2.758138567664938e-231	Neuron
Cdkl5	1.1147347386080402e-235	1.2921778620815936	0.205	0.052	2.796200618324408e-231	Neuron
Alkbh6	1.3365470191757126e-235	1.1299748404630978	0.223	0.064	3.352594542900357e-231	Neuron
N6amt1	1.3537242202678852e-235	1.0960766051426023	0.216	0.059	3.3956818341199636e-231	Neuron
Ankrd46	2.0263937494310047e-235	0.7900778155581962	0.256	0.084	5.083006081072732e-231	Neuron
Pcbp3	6.068813621612752e-235	1.2014484839237902	0.202	0.05	1.5223012088453427e-230	Neuron
Exoc3	9.118001459846287e-235	0.501479	0.406	0.186	2.2871594861878425e-230	Neuron
Wnk3	1.5045850518646832e-234	1.108222591635712	0.207	0.053	3.7741011440973713e-230	Neuron
Gm1976	3.210788994162429e-234	1.0451095800763919	0.254	0.084	8.053943112957037e-230	Neuron
Actr6	3.672238387337271e-234	1.146399392623236	0.218	0.061	9.21144277079681e-230	Neuron
Kpna1	5.638882039334374e-234	0.7651714183267548	0.264	0.089	1.4144571707466346e-229	Neuron
Yars	1.1013648908480318e-233	0.742685	0.278	0.097	2.762663692203203e-229	Neuron
Napa	1.3584868056531639e-233	0.6640329399186005	0.319	0.126	3.4076283033003965e-229	Neuron
Scaper	1.653891965181643e-233	0.4451832722628235	0.547	0.288	4.148622605461633e-229	Neuron
Uchl5	2.132706285996347e-233	0.9082293593769376	0.254	0.083	5.349680447793237e-229	Neuron
4732471J01Rik	2.6330037932998975e-233	0.9156387684594872	0.28	0.102	6.604626715113463e-229	Neuron
Mtx2	2.7312482846274596e-233	0.9621053026647658	0.234	0.07	6.85106319715952e-229	Neuron
Lncpint	3.4526697568561325e-233	0.6506888255152611	0.428	0.211	8.660676818097923e-229	Neuron
Map3k4	4.047947184903588e-233	1.0135745649052312	0.244	0.077	1.015387071861216e-228	Neuron
Apex2	4.1197862788572495e-233	1.385829983545617	0.209	0.057	1.0334071901885524e-228	Neuron
Tmem132a	6.966021018831017e-233	1.5762185087138203	0.174	0.035	1.747356712363572e-228	Neuron
Atp5g3	9.009433059889208e-233	0.9559249851407532	0.402	0.212	2.2599261887426088e-228	Neuron
Jkamp	1.2418049396355575e-232	0.5778265890350192	0.323	0.127	3.1149435105818327e-228	Neuron
Rae1	1.3850643026618312e-232	0.7685746208324759	0.309	0.121	3.474295296796937e-228	Neuron
Rabggtb	1.4938688797861914e-232	1.2126521920097661	0.204	0.052	3.7472206980556826e-228	Neuron
Dlx1	1.7917201878106318e-232	4.490664342667112	0.118	0.005	4.494350919104189e-228	Neuron
Ankrd10	2.2820086057850153e-232	0.8535397838687174	0.282	0.102	5.724190386751132e-228	Neuron
Taf1b	2.6281465924479052e-232	1.0107147957755258	0.253	0.085	6.592442912496325e-228	Neuron
Psmd4	3.230638927855309e-232	0.45800557093447236	0.472	0.232	8.103734686632257e-228	Neuron
Tox3	4.6976776843796796e-232	1.5421995938814659	0.183	0.041	1.178365470349799e-227	Neuron
Zmym4	7.685443157272126e-232	0.5066307560440139	0.422	0.199	1.92781656157014e-227	Neuron
Dnajc2	1.5619001065330276e-231	0.6671617149978228	0.303	0.117	3.9178702272274465e-227	Neuron
Ap2m1	2.1518097524057895e-231	0.8639584162023424	0.291	0.111	5.397599582934682e-227	Neuron
Rmdn3	2.696812199856194e-231	1.054299023498443	0.233	0.071	6.764683722119277e-227	Neuron
Nat14	3.416242799479397e-231	1.1140445132253305	0.225	0.066	8.56930343821412e-227	Neuron
Srrm4os	5.987219936644522e-231	5.126521673802687	0.115	0.004	1.501834248907912e-226	Neuron
Brinp2	9.741511831493983e-231	1.0831699000153567	0.212	0.057	2.443560827811951e-226	Neuron
Gabrq	1.5681553412106243e-230	4.504340845897918	0.116	0.004	3.93356085789273e-226	Neuron
Prkar1a	2.1026876638346472e-230	0.8009106710459591	0.458	0.255	5.274381735962829e-226	Neuron
Helz	3.414528642344535e-230	0.6343589796479583	0.327	0.132	8.565003646457032e-226	Neuron
Syt14	4.237739102651891e-230	1.5504448427794972	0.179	0.039	1.0629944765092005e-225	Neuron
Zdhhc22	4.423133353168609e-230	3.2241734624791327	0.124	0.008	1.1094987703088138e-225	Neuron
Slitrk1	5.548690134868787e-230	1.716586231632213	0.154	0.023	1.3918334334304865e-225	Neuron
Gm15398	5.602319683273807e-230	1.781925135658579	0.186	0.044	1.4052858693524017e-225	Neuron
Tomm20	5.8818588176752455e-230	1.2690045324026196	0.2	0.051	1.4754054658256586e-225	Neuron
Gck	1.4226273673483215e-229	3.2174477613283807	0.129	0.011	3.568518488256529e-225	Neuron
Tspan17	1.7959575797415634e-229	1.6334904300642676	0.171	0.034	4.5049799930237377e-225	Neuron
Fkbp2	2.2913685686577106e-229	0.8356351507324162	0.44	0.239	5.747668917621001e-225	Neuron
Gm27008	3.667696631872977e-229	2.7336700681040194	0.133	0.013	9.200050231390176e-225	Neuron
Cgn	5.915139584196377e-229	3.949162452407479	0.118	0.006	1.4837536132998192e-224	Neuron
Gm14703	9.236794447232526e-229	3.873039898578799	0.12	0.006	2.3169575191438065e-224	Neuron
Umad1	2.0813792412377323e-228	1.8588618146339009	0.152	0.023	5.220931688720727e-224	Neuron
Sv2b	3.713008146473591e-228	3.557448608265781	0.121	0.007	9.313709634614355e-224	Neuron
Usp7	6.075780462644338e-228	0.742467	0.314	0.126	1.5240487712497056e-223	Neuron
BC030499	8.199130792995908e-228	3.933751027613151	0.124	0.009	2.0566699681150935e-223	Neuron
Cops5	8.324666261499967e-228	0.6272672267858094	0.311	0.122	2.088159285034652e-223	Neuron
Oaz2	8.936813107662834e-228	0.6325535330445407	0.324	0.131	2.2417101999261453e-223	Neuron
Hdac9	1.252255913308497e-227	0.9485474571095873	0.377	0.18	3.141158732943034e-223	Neuron
Ociad1	3.0520553403930097e-227	0.7698483123932469	0.485	0.286	7.655775615841825e-223	Neuron
Ppp2r2c	4.055138724402132e-227	0.7432694988929682	0.259	0.088	1.0171909976290308e-222	Neuron
Gpr137c	4.492110163400902e-227	0.8648747501252122	0.27	0.097	1.1268009133874822e-222	Neuron
Kif17	4.751052830269548e-227	3.019973866653196	0.133	0.014	1.1917540919448134e-222	Neuron
Mturn	6.17569189912684e-227	1.6449791888152496	0.168	0.033	1.5491105559769766e-222	Neuron
Ddx42	8.054353760897783e-227	0.46101	0.435	0.208	2.0203540973836e-222	Neuron
B230216N24Rik	1.3916504089324938e-226	4.192833969212468	0.118	0.006	3.4908158857662676e-222	Neuron
Rraga	1.4538635491115422e-226	0.9134506306395787	0.271	0.098	3.646871326591393e-222	Neuron
Tfg	3.2693486408302793e-226	0.7879482748106733	0.271	0.097	8.200834130658672e-222	Neuron
Cyp4x1	2.4796493945885632e-225	4.773051644852943	0.112	0.003	6.219952541385951e-221	Neuron
Ndst4	2.803705347946681e-225	3.8172376860573607	0.122	0.008	7.032814494789455e-221	Neuron
Aktip	5.390851734432649e-225	0.5898178104458944	0.337	0.141	1.3522412490650857e-220	Neuron
Brcc3	7.183016521013176e-225	0.7743289360712196	0.262	0.091	1.801787864130945e-220	Neuron
Ap2s1	7.654065400287233e-225	0.8870714911397479	0.286	0.11	1.9199457650080496e-220	Neuron
Cul5	1.196873171499397e-224	0.42917396130959296	0.471	0.233	3.0022366633890873e-220	Neuron
Zmat1	1.3072659304277064e-224	0.8362826522594583	0.277	0.103	3.2791458598848585e-220	Neuron
Cops4	2.410741429656329e-224	0.76412	0.265	0.093	6.047103802149935e-220	Neuron
Stk32c	3.0802089287420757e-224	1.9115867780211726	0.154	0.026	7.726396076856623e-220	Neuron
Hdac7	3.7608948392169907e-224	1.2319541296686323	0.21	0.059	9.4338286146919e-220	Neuron
Enpp5	4.2030040545311695e-224	0.793463	0.309	0.125	1.0542815370385985e-219	Neuron
Acvr2a	4.308846650139352e-224	0.9818338760228933	0.241	0.079	1.080831093720955e-219	Neuron
Ubr1	6.69366222958726e-224	0.488509	0.391	0.178	1.679038233669668e-219	Neuron
Nckipsd	7.006147167367945e-224	1.673376315160283	0.166	0.032	1.7574219554625755e-219	Neuron
Polr2m	9.594761934579135e-224	0.9586147660364849	0.257	0.09	2.40675008366983e-219	Neuron
Snph	1.2093869319892146e-223	1.0198608256804227	0.237	0.076	3.033626180201746e-219	Neuron
Hpf1	1.318002628352702e-223	0.6184034776967646	0.318	0.128	3.3060777929599174e-219	Neuron
Arhgef17	1.4901318884752187e-223	1.2473206589408294	0.196	0.05	3.7378468290512384e-219	Neuron
Rtl8b	1.495745394974443e-223	0.9539191781191376	0.268	0.098	3.751927748753893e-219	Neuron
Hecw2	1.6533971755729133e-223	0.34339698421001397	0.266	0.093	4.147381475207096e-219	Neuron
Srsf12	2.903191538022052e-223	2.5604863426249813	0.132	0.014	7.282365653974515e-219	Neuron
Smc6	3.484409442173999e-223	0.41010352512125525	0.468	0.232	8.74029264474926e-219	Neuron
Camk2n2	4.072239934577625e-223	2.8273985481332433	0.126	0.011	1.0214806651894516e-218	Neuron
Psmc5	4.64814360066108e-223	0.7867869042724223	0.37	0.175	1.1659403407898252e-218	Neuron
Vamp4	4.923604440652207e-223	0.5274759194150618	0.343	0.144	1.2350369378931996e-218	Neuron
Enc1	5.8555937578966655e-223	1.6204147705370593	0.171	0.036	1.4688171382307995e-218	Neuron
Pafah1b3	5.861589790043835e-223	1.6642522348332338	0.162	0.03	1.4703211829345955e-218	Neuron
Ergic2	7.396625406520738e-223	0.6781638086764049	0.282	0.106	1.855369516971662e-218	Neuron
Fam213b	7.462843761313427e-223	1.553676676995858	0.173	0.037	1.87197972908786e-218	Neuron
Gm1043	8.854377218375875e-223	2.2256007479805184	0.147	0.022	2.2210319814574043e-218	Neuron
Fbxo34	1.3206423575448472e-222	0.9409202250597466	0.21	0.058	3.3126992896654947e-218	Neuron
Nos1ap	1.3489570376678953e-222	0.7633949041584358	0.301	0.119	3.383723833286149e-218	Neuron
Zim3	1.4947742568634643e-222	3.5482069474590876	0.117	0.006	3.749491745916314e-218	Neuron
Pde1b	4.113315556203132e-222	2.4233569225873746	0.132	0.014	1.0317840741179936e-217	Neuron
Cobl	6.668427908044074e-222	0.5706460475151411	0.279	0.102	1.6727084564537755e-217	Neuron
Prps1	7.574261922427375e-222	1.7058168640059728	0.158	0.029	1.899927860621683e-217	Neuron
Crbn	9.948644846224615e-222	0.7489964963942477	0.266	0.095	2.4955180732269824e-217	Neuron
Ap3d1	1.294815139965147e-221	0.519028	0.38	0.171	3.247914297088575e-217	Neuron
Tardbp	4.683263323177826e-221	0.5745826732565908	0.401	0.189	1.1747497719859259e-216	Neuron
Srsf10	5.246389848617968e-221	0.635332	0.419	0.203	1.316004429627331e-216	Neuron
Tmem175	5.301733986938809e-221	0.6691451144939176	0.335	0.141	1.329886953283731e-216	Neuron
Vdac3	9.496661167860144e-221	0.8299136451316591	0.303	0.123	2.3821424873460386e-216	Neuron
Mphosph9	1.2010202705155802e-220	0.973867	0.242	0.081	3.0126392465612816e-216	Neuron
Srpr	1.6972938318947228e-220	0.5372077491662087	0.346	0.148	4.257491847924723e-216	Neuron
Prpf19	2.2051391230715092e-220	0.5536799183943394	0.344	0.147	5.531370976312574e-216	Neuron
Wnk2	3.2537829864047912e-220	0.6889570501771946	0.308	0.123	8.161789243097778e-216	Neuron
Tatdn1	4.006935667554453e-220	1.0086371471454032	0.238	0.078	1.0050997428493589e-215	Neuron
Zcchc11	5.2296784570787295e-220	0.571146	0.48	0.252	1.3118125441736285e-215	Neuron
Cdkn2d	5.529850514537277e-220	1.2946578535325348	0.183	0.043	1.3871077030665307e-215	Neuron
Gng4	7.65052319117449e-220	2.3699884352383687	0.136	0.017	1.919057237274209e-215	Neuron
Clstn1	9.11865723235482e-220	0.5491880393534115	0.349	0.15	2.287323980163883e-215	Neuron
Rgs11	1.3510000708324725e-219	2.2514566540672596	0.156	0.029	3.388848577676174e-215	Neuron
Orc2	3.404724537821205e-219	0.8257646631172992	0.281	0.107	8.54041103067071e-215	Neuron
Ss18l1	7.033650570869454e-219	2.2092058283759735	0.142	0.02	1.764320909196894e-214	Neuron
Sclt1	9.21087545916038e-219	0.7066267938969711	0.365	0.167	2.3104560001757897e-214	Neuron
Gga2	1.0251016206523773e-218	1.7388590272560143	0.169	0.036	2.571364905244423e-214	Neuron
Ttc8	1.0728551645715301e-218	0.7179713685854501	0.338	0.146	2.691149894811226e-214	Neuron
Rgs8	1.4998347190419675e-218	4.203425528019141	0.111	0.004	3.762185409244871e-214	Neuron
Gpr101	1.5113725949144537e-218	4.3072494883050645	0.115	0.006	3.791127017083416e-214	Neuron
Rabep1	2.77267326762347e-218	0.3238957430147531	0.624	0.349	6.954973624506712e-214	Neuron
BC029722	2.869083311951547e-218	1.0781536974486903	0.21	0.06	7.1968085796992604e-214	Neuron
Bhlhb9	2.8691163767336777e-218	0.8022627567377038	0.254	0.088	7.196891519398757e-214	Neuron
Zscan18	3.057937073926022e-218	1.702527842195879	0.157	0.029	7.670529356236035e-214	Neuron
Rad23b	3.888989115629114e-218	0.5942406639933323	0.313	0.126	9.75514029764407e-214	Neuron
Astn1	1.2253881374636501e-217	0.36472661700570685	0.448	0.215	3.07376360401382e-213	Neuron
Nkrf	1.4738179397828054e-217	2.49008	0.128	0.013	3.696924920151189e-213	Neuron
Anks3	1.481687068809727e-217	0.9416741656418858	0.264	0.097	3.716663843402319e-213	Neuron
Cfdp1	1.7008538421225691e-217	0.5000027103687975	0.475	0.251	4.2664217775802526e-213	Neuron
Taok3	3.2115130166373723e-217	0.4500658023191594	0.385	0.176	8.055759250933184e-213	Neuron
Ythdc2	4.161100206651131e-217	1.2258258097854275	0.198	0.053	1.0437703758363697e-212	Neuron
Cbln2	5.239865432190073e-217	4.183424510796805	0.114	0.006	1.3143678450105577e-212	Neuron
Esrrg	7.236454068226702e-217	1.2104062383523582	0.239	0.083	1.815192138473986e-212	Neuron
Vps13b	1.330257962083661e-216	0.7043755155963134	0.387	0.186	3.3368190720906555e-212	Neuron
Uba6	1.3948964804884726e-216	1.019990644758804	0.224	0.07	3.4989583316572847e-212	Neuron
Pomgnt2	2.32922119541375e-216	2.202470459364083	0.135	0.017	5.842618446575851e-212	Neuron
Gm10125	2.778527955959984e-216	0.9929114730919167	0.24	0.08	6.969659524730024e-212	Neuron
Lnx1	2.9021434763754145e-216	0.7707531636205125	0.243	0.08	7.279736696140089e-212	Neuron
Cbln4	3.0951819280205426e-216	4.505153145047414	0.108	0.003	7.763954348246729e-212	Neuron
Gnptg	3.3167413880217244e-216	0.503567	0.356	0.156	8.319714097713693e-212	Neuron
Sfxn3	3.449857581000779e-216	1.8591689065879096	0.154	0.028	8.653622756182354e-212	Neuron
Arl4c	3.50729340276995e-216	1.4198456790860496	0.165	0.033	8.797694771508142e-212	Neuron
Tmem9	5.33363779071375e-216	0.7839679225216872	0.246	0.083	1.337889703422637e-211	Neuron
Gm10785	6.651274354511109e-216	1.2836830402893797	0.2	0.056	1.6684056590855665e-211	Neuron
Mrps10	1.233555472016328e-215	0.9265588807194562	0.239	0.08	3.094250546005757e-211	Neuron
Ppip5k2	1.7884346521703102e-215	1.3148287904043592	0.185	0.046	4.486109481504006e-211	Neuron
Kcnb1	3.126833602482894e-215	0.7725382533048619	0.233	0.075	7.843349408468091e-211	Neuron
Mdh2	4.6303561487624754e-215	0.7903934269260904	0.393	0.2	1.1614785363555793e-210	Neuron
Tcp1	4.939354320662958e-215	0.7356440419558378	0.317	0.134	1.2389876377950964e-210	Neuron
Guk1	5.003704831390906e-215	0.8410551671288256	0.243	0.083	1.2551293199060949e-210	Neuron
Naa20	5.072706332105767e-215	0.6637774288819209	0.271	0.099	1.2724376563454105e-210	Neuron
Lcmt1	7.201167757524694e-215	0.9551404466364689	0.219	0.067	1.8063409202974945e-210	Neuron
Dlgap3	1.1168871669828963e-214	2.948879708411092	0.122	0.011	2.801599769659897e-210	Neuron
Orc4	1.121312563362427e-214	0.7665007840425886	0.264	0.095	2.812700433938312e-210	Neuron
Cpsf7	1.4476146832377785e-214	0.687676	0.311	0.127	3.6311966714336435e-210	Neuron
Zcchc7	1.9059926975099135e-214	0.43989843184926136	0.516	0.278	4.7809920824338674e-210	Neuron
Oprk1	2.3220792702007197e-214	5.5038	0.108	0.004	5.824703641371485e-210	Neuron
Ube2q2	2.529844792775316e-214	0.8300959367924305	0.229	0.073	6.345862678197603e-210	Neuron
Nprl2	3.0699795108039274e-214	1.369013888210511	0.179	0.043	7.700736604900572e-210	Neuron
Dach1	3.555757601395303e-214	2.319533705673796	0.169	0.039	8.919262367339977e-210	Neuron
Snapc1	4.478943602293594e-214	1.010444002936055	0.204	0.058	1.1234982131993251e-209	Neuron
Fam103a1	4.821401785452309e-214	1.0578020712726488	0.213	0.064	1.2094004238628573e-209	Neuron
Paip2	5.262875083411948e-214	0.3420333924590524	0.631	0.359	1.320139585923053e-209	Neuron
Usmg5	5.505041357711602e-214	1.1414934887771095	0.29	0.123	1.3808845741683782e-209	Neuron
Poglut1	8.314347905076322e-214	1.0253005629432903	0.22	0.068	2.0855710285093447e-209	Neuron
Mapk11	1.080112364213701e-213	4.185860325554254	0.111	0.005	2.709353854393648e-209	Neuron
Slc1a6	1.6024532498322523e-213	3.2867116987589275	0.115	0.007	4.0195937318792215e-209	Neuron
Usp20	3.3386928496511325e-213	1.2632217239538641	0.204	0.059	8.374777144064901e-209	Neuron
Slc25a46	5.035692311981138e-213	0.8204802540953835	0.233	0.076	1.2631530595373485e-208	Neuron
Ufd1	9.679782356832674e-213	0.638777	0.296	0.117	2.428076606387908e-208	Neuron
Plppr1	9.88654783139834e-213	1.297560289721508	0.176	0.041	2.4799416580279597e-208	Neuron
Pstk	1.0053981548375128e-212	0.9175282577446597	0.237	0.079	2.5219407315944173e-208	Neuron
Vbp1	1.9045042695849627e-212	0.7034609654300893	0.278	0.105	4.77725850982692e-208	Neuron
Zer1	1.9679606288992062e-212	0.7561469440521132	0.274	0.104	4.936432441530769e-208	Neuron
Ctif	3.1057712854474485e-212	0.8887344911467013	0.246	0.086	7.790516692416379e-208	Neuron
Ufsp2	6.513417175490939e-212	0.8422847783450551	0.238	0.08	1.633825564300147e-207	Neuron
Asxl3	7.282737074053813e-212	0.9770041403212304	0.201	0.056	1.8268017676556586e-207	Neuron
Prpf39	7.402490434827075e-212	0.7467399641370409	0.32	0.137	1.8568407006720233e-207	Neuron
Gpatch4	9.60308812762901e-212	1.2729105869852007	0.176	0.042	2.408838625934461e-207	Neuron
Slc9a6	9.80021407520603e-212	1.3918373194025615	0.171	0.038	2.4582856986246808e-207	Neuron
Ampd2	1.2087383050947711e-211	1.6850362835808703	0.161	0.032	3.031999164499724e-207	Neuron
1500009L16Rik	1.502362905365994e-211	2.01926	0.136	0.019	3.768527111820059e-207	Neuron
Pnpt1	2.0445465807198958e-211	0.9911643104409482	0.24	0.083	5.128540643077787e-207	Neuron
Osbpl9	2.162597314138998e-211	0.453271	0.468	0.242	5.424659102786263e-207	Neuron
Plvap	3.6688364756724723e-211	3.7108544599966917	0.113	0.007	9.202909415576829e-207	Neuron
Bex4	4.373404756097848e-211	1.706963121706941	0.145	0.023	1.0970248490195842e-206	Neuron
Trappc4	6.313048735872835e-211	0.8188493775644067	0.256	0.092	1.583565144906342e-206	Neuron
Rapgefl1	1.0613330704692717e-210	2.5064960773545857	0.132	0.017	2.662247873965121e-206	Neuron
Nlgn1	1.0757331514297953e-210	0.3877787939531383	0.734	0.474	2.6983690370464983e-206	Neuron
Sema4g	1.2532519177813416e-210	2.1948836256220003	0.139	0.021	3.1436571105627174e-206	Neuron
Slc29a1	1.6185310496001125e-210	2.04925	0.143	0.023	4.059923284816922e-206	Neuron
Fam117b	2.1568228425258326e-210	0.6577497132405878	0.257	0.091	5.410174418191798e-206	Neuron
Cox5a	2.326122752847866e-210	0.9503796318962885	0.389	0.208	5.834846313243588e-206	Neuron
Gm20696	2.710584023530534e-210	1.7038361702023535	0.163	0.035	6.799228964623992e-206	Neuron
Zrsr2	2.9650517061239352e-210	0.7923298651022612	0.274	0.106	7.437535699641279e-206	Neuron
Birc6	3.163745816467341e-210	0.4641652691402006	0.472	0.242	7.935940006026678e-206	Neuron
Wdfy3	3.740656118436456e-210	0.5391792017845614	0.398	0.19	9.383061807486006e-206	Neuron
Crtac1	3.8790545173925853e-210	1.7734035324221227	0.148	0.026	9.730220351427561e-206	Neuron
Eif4e	4.028670953216041e-210	0.60332	0.29	0.113	1.0105518219047118e-205	Neuron
Dhx36	4.9458456832910014e-210	0.3787556331009486	0.447	0.22	1.2406159311967148e-205	Neuron
Glce	5.2572289153699766e-210	1.7524697959465179	0.158	0.032	1.3187233011314049e-205	Neuron
Gm26582	5.6457377936266427e-210	1.8061640528901897	0.151	0.027	1.4161768681533071e-205	Neuron
Ncapd3	1.031329396062716e-209	1.1189497482366875	0.22	0.07	2.586986657083717e-205	Neuron
Gm1992	1.350346823667672e-209	2.0286055543138612	0.139	0.021	3.3872099724879887e-205	Neuron
Dram1	3.3662121236016325e-209	3.1198700535477153	0.115	0.008	8.443806490842335e-205	Neuron
Ephb2	5.005685111511995e-209	1.9026084275748094	0.147	0.025	1.2556260533716686e-204	Neuron
Rheb	6.472800582025075e-209	0.6968752324956988	0.326	0.143	1.6236372979951697e-204	Neuron
AW209491	2.432325984459492e-208	1.403945906120236	0.162	0.034	6.10124649941819e-204	Neuron
Safb	2.4633223753455253e-208	0.4287442248152651	0.495	0.261	6.1789978463167156e-204	Neuron
Cntnap3	2.5533255254418417e-208	4.519258024877224	0.107	0.004	6.404761748018316e-204	Neuron
Kif3c	2.6193091546425508e-208	0.655643	0.274	0.103	6.570275083505374e-204	Neuron
Dctn3	2.9862675046902204e-208	0.8389255776313109	0.317	0.14	7.490753408764948e-204	Neuron
Lrp1b	3.5075193499593343e-208	0.3150747340729474	0.775	0.506	8.798261537437995e-204	Neuron
Agap2	5.525829897891662e-208	1.2838791196653827	0.194	0.054	1.3860991715871445e-203	Neuron
Smarcd3	6.003450902214883e-208	0.8353352410563353	0.225	0.072	1.5059056243115813e-203	Neuron
Psma5	6.241518295361316e-208	0.5375770893537835	0.351	0.156	1.5656224492084326e-203	Neuron
Vstm2l	6.787764409560249e-208	4.122587968164637	0.107	0.005	1.702642824494093e-203	Neuron
Kif26b	8.370604567029148e-208	1.7698537652631119	0.172	0.042	2.0996824495935915e-203	Neuron
Rbm25	1.1259232694190454e-207	0.3894600079266213	0.837	0.57	2.824265929010733e-203	Neuron
Pim2	1.1416512784187733e-207	1.346426130131586	0.177	0.044	2.8637180667856506e-203	Neuron
Sh3kbp1	1.2767365734533067e-207	0.37141670354947104	0.345	0.149	3.2025660208502747e-203	Neuron
Rbm6	2.062209250750928e-207	0.43874774700625385	0.509	0.272	5.172845684583627e-203	Neuron
Spaca6	2.2487001189156022e-207	0.9315371453990099	0.231	0.077	5.640639378287897e-203	Neuron
Grik5	2.2679498733456977e-207	0.6344936550382214	0.283	0.109	5.688925462300348e-203	Neuron
Clock	2.705402140197498e-207	0.5199854983136989	0.353	0.158	6.786230728471404e-203	Neuron
Glrx2	3.158611031513643e-207	0.5140544323398835	0.309	0.127	7.923059911448822e-203	Neuron
Rnf34	6.520744719467599e-207	0.7352273202888819	0.258	0.094	1.6356636054312525e-202	Neuron
Xbp1	7.491171938883071e-207	0.785234	0.247	0.087	1.8790855691494294e-202	Neuron
Zcrb1	8.0518532357795e-207	0.5843096655497709	0.369	0.173	2.0197268656629298e-202	Neuron
Spin1	8.809366043974428e-207	1.1262376999900885	0.175	0.042	2.2097413784705456e-202	Neuron
Dpf1	1.2286448105321609e-206	1.6195209734082485	0.152	0.029	3.0819326427388724e-202	Neuron
Fbxo3	1.509369830596283e-206	0.5590535483969076	0.299	0.121	3.7861032830677166e-202	Neuron
Ndfip2	2.1269979315174473e-206	0.4991428468709133	0.295	0.117	5.335361611418365e-202	Neuron
Lmbrd2	2.1495338797445435e-206	1.0047941748344587	0.226	0.074	5.391890783951213e-202	Neuron
Lrrfip2	2.814060301196768e-206	0.6598120709306724	0.301	0.124	7.058788859521973e-202	Neuron
Ap2b1	3.36416489898821e-206	0.4079533187190127	0.395	0.185	8.438671232622025e-202	Neuron
Ldha	4.41824481820147e-206	0.7627506859550037	0.266	0.1	1.1082725301976567e-201	Neuron
Tasp1	5.700354173312678e-206	0.8492342379895892	0.23	0.076	1.4298768408337521e-201	Neuron
Rtl5	8.919102531999644e-206	2.335218978379081	0.128	0.016	2.2372676791267907e-201	Neuron
Pcnp	1.294374423276536e-205	0.5317897865518648	0.349	0.156	3.246808803346863e-201	Neuron
Ralgapa1	1.3208219369185363e-205	0.48687829580816333	0.5	0.27	3.3131497465664566e-201	Neuron
Trappc2l	1.436886194962077e-205	0.8564279965759879	0.248	0.089	3.604285331442874e-201	Neuron
Pak6	1.689729459962247e-205	2.2046175089446787	0.134	0.019	4.238517377369301e-201	Neuron
Iscu	2.290150368262414e-205	0.8116517345996054	0.256	0.094	5.74461318374944e-201	Neuron
Acat1	2.305516646630457e-205	0.3841898247942779	0.488	0.254	5.783157956407838e-201	Neuron
Orc6	2.6826013157092303e-205	0.8797989287915301	0.23	0.077	6.729037140325034e-201	Neuron
Usp10	2.790827322231645e-205	0.9212545553064869	0.211	0.065	7.000511255085858e-201	Neuron
Gm16183	2.834749897360501e-205	2.152100677486561	0.138	0.022	7.11068664253908e-201	Neuron
Ubr4	3.154286188594324e-205	0.9504776678311903	0.247	0.089	7.912211475470002e-201	Neuron
Mrps18a	3.2819047001513914e-205	0.7205232810308754	0.234	0.079	8.23232974985975e-201	Neuron
Zic1	4.382253429566972e-205	1.4515231821945083	0.176	0.044	1.0992444502725793e-200	Neuron
Tpp2	6.521599631136243e-205	0.6488452155561011	0.278	0.108	1.635878051474215e-200	Neuron
Pnpo	7.206279045143881e-205	1.2329361094933513	0.173	0.042	1.807623035683891e-200	Neuron
Nos1	1.2398932129274971e-204	3.4731972370116493	0.112	0.008	3.1101481353073335e-200	Neuron
Ppig	1.3878356371777289e-204	0.3625817928095638	0.604	0.346	3.481246912296615e-200	Neuron
Asb3	2.241045101007398e-204	0.5611821169068265	0.33	0.143	5.621437531366957e-200	Neuron
Tm9sf4	2.395129217785805e-204	0.4768575551314378	0.327	0.139	6.007942129893913e-200	Neuron
Rap1gap	2.4474156821515255e-204	0.4633499526423749	0.275	0.103	6.139097497108887e-200	Neuron
Zfas1	3.448424997776349e-204	0.8652648755744592	0.225	0.074	8.650029264422195e-200	Neuron
Insig2	3.707364923034592e-204	0.6801209200921092	0.263	0.098	9.29955417293997e-200	Neuron
Ube3c	4.011398777699883e-204	0.5522716969486057	0.363	0.168	1.0062192693982387e-199	Neuron
Neto1	4.807925749637243e-204	1.4363514807393087	0.164	0.036	1.206020095039006e-199	Neuron
Htr4	1.0037503819247493e-203	3.6887305426572268	0.109	0.006	2.5178074580200412e-199	Neuron
Ubp1	1.0499676147799864e-203	0.8876513146636025	0.246	0.089	2.633738764914118e-199	Neuron
Sfxn1	1.1731297562839653e-203	0.44666548728748723	0.371	0.17	2.9426786806626983e-199	Neuron
Gm11418	1.3535191709179564e-203	4.186024990814688	0.107	0.006	3.395167488330602e-199	Neuron
Mecr	1.4478514380657196e-203	1.0894979506389473	0.221	0.073	3.631790547244051e-199	Neuron
St3gal5	2.1567746026383608e-203	0.6284447876762641	0.244	0.086	5.410053413258064e-199	Neuron
Bicdl1	2.250098340643188e-203	1.4677743806860568	0.179	0.047	5.644146677669373e-199	Neuron
Maea	2.4034718742681229e-203	0.8490955682257755	0.229	0.076	6.028868849414159e-199	Neuron
Cd47	3.620295769707749e-203	0.49990218838267486	0.507	0.281	9.081149908734918e-199	Neuron
Ddx27	3.925389288130248e-203	1.026042755992084	0.221	0.073	9.846446490345913e-199	Neuron
Psmb2	1.1626923400365965e-202	0.3693443640778574	0.425	0.206	2.9164974657477987e-198	Neuron
Gm36388	1.2106304874396008e-202	4.640356574684186	0.104	0.004	3.036745514693495e-198	Neuron
Pfkl	1.2801775860092867e-202	1.0141971846371285	0.204	0.061	3.2111974567456948e-198	Neuron
5730409E04Rik	1.668350286531928e-202	1.4355749485729383	0.159	0.034	4.184889858736688e-198	Neuron
Sgsm3	2.241398190783402e-202	1.2163983609956213	0.184	0.049	5.622323221761085e-198	Neuron
Carmil2	2.2465858274456994e-202	3.9796162828253663	0.105	0.004	5.6353358895647924e-198	Neuron
Chsy3	5.567826002355379e-202	2.007397666312113	0.144	0.026	1.3966334744308232e-197	Neuron
Sec24a	6.783624738298718e-202	0.8716538293059006	0.256	0.096	1.7016044293548503e-197	Neuron
B4gat1	1.0745270684605677e-201	0.77978	0.275	0.108	2.695343698526488e-197	Neuron
Hspbp1	1.6536997166989644e-201	0.9656370078060492	0.204	0.061	4.148140369367682e-197	Neuron
Otub1	1.7168971305214544e-201	0.8845642411707573	0.225	0.075	4.306664762200016e-197	Neuron
Smyd2	1.912008403555657e-201	1.2653804380425595	0.164	0.037	4.79608187947901e-197	Neuron
Mmp24	2.6255889231129474e-201	3.451075585536738	0.111	0.008	6.586027254736518e-197	Neuron
C1d	3.2099111436514717e-201	0.7900990430550365	0.258	0.098	8.051741112735352e-197	Neuron
AC153912.1	3.404039003511026e-201	1.4000304338189276	0.182	0.048	8.538691436407057e-197	Neuron
Vopp1	4.143087371678834e-201	1.36011	0.159	0.034	1.0392520363119187e-196	Neuron
Ptpn3	4.26200853379286e-201	3.504456001171431	0.117	0.011	1.069082220616601e-196	Neuron
Zfp846	4.283595269980556e-201	1.0485703397011958	0.2	0.059	1.0744970375219226e-196	Neuron
Samd10	4.30082994033142e-201	2.869707765735069	0.119	0.012	1.0788201822327332e-196	Neuron
Scn1b	4.6198572789582354e-201	2.8138470616152507	0.113	0.009	1.1588449998538838e-196	Neuron
Ccdc106	1.0632247490841311e-200	1.4476996900355494	0.164	0.037	2.6669929606026346e-196	Neuron
Prpf6	1.966933239294895e-200	0.41870429787572466	0.38	0.178	4.933855337447315e-196	Neuron
Oprl1	4.4147126096922135e-200	2.442744464150211	0.117	0.011	1.1073865110151949e-195	Neuron
Rbm33	1.4080365625138355e-199	0.7397794426229346	0.265	0.102	3.531918913409705e-195	Neuron
Arl2	1.4295259215269903e-199	0.4740996537891856	0.309	0.13	3.585822821558302e-195	Neuron
Gon4l	1.8838863208668507e-199	0.6645449107116147	0.279	0.111	4.725540447262408e-195	Neuron
Rab40b	2.5036440776186577e-199	2.7351814687660623	0.119	0.013	6.280140804298641e-195	Neuron
Arl6ip4	2.5601848131163422e-199	0.6640290610680437	0.262	0.099	6.421967585221033e-195	Neuron
Psmd7	2.7472021964132015e-199	0.40229867192149826	0.488	0.258	6.891081989482874e-195	Neuron
Pfn2	3.781613203123465e-199	0.5592775761883872	0.365	0.178	9.485798558714899e-195	Neuron
Ttbk2	3.9162885109163524e-199	1.2601300846036367	0.173	0.043	9.823618100782578e-195	Neuron
Nudcd1	4.781129094902505e-199	1.7297870483518951	0.147	0.028	1.1992984221653442e-194	Neuron
Chid1	7.99410559396704e-199	1.1448425176169519	0.179	0.047	2.0052414471906923e-194	Neuron
Senp5	8.856003933822419e-199	0.6758829337296547	0.281	0.113	2.2214400267600156e-194	Neuron
Tmem35a	9.722155857485301e-199	2.0062967678783172	0.129	0.018	2.438705575291613e-194	Neuron
Shank2	1.641163756736059e-198	0.7622412267889153	0.235	0.083	4.1166951673967305e-194	Neuron
Cops3	2.2281735957197447e-198	0.5140311893102334	0.324	0.141	5.589150647503408e-194	Neuron
1110008P14Rik	2.513098132083765e-198	1.4438839844367848	0.156	0.033	6.303855354518916e-194	Neuron
Bcap29	8.624678496738152e-198	0.48179582474643246	0.327	0.144	2.163414354121798e-193	Neuron
Ttbk1	9.523269334769981e-198	2.0123432186590455	0.143	0.026	2.388816879933702e-193	Neuron
Ago3	1.0903501716674209e-197	0.4312904218983258	0.455	0.236	2.7350343706105587e-193	Neuron
Rnf128	1.4080094200313934e-197	1.556800632259733	0.152	0.031	3.531850829206747e-193	Neuron
Uxs1	1.4358370629186124e-197	1.128631024354494	0.186	0.052	3.6016536886250476e-193	Neuron
Znrf1	1.4465039322825263e-197	0.5314416776293608	0.28	0.111	3.628410463737489e-193	Neuron
Ilf3	1.779016526888029e-197	0.4873842102288809	0.31	0.131	4.462485056045932e-193	Neuron
Lcor	2.6231988177163604e-197	0.38051497259921274	0.393	0.188	6.580031914359718e-193	Neuron
Ttc9b	2.6592723078012562e-197	2.5145797739349858	0.116	0.011	6.670518656888671e-193	Neuron
Idh3a	2.882904200519613e-197	0.6252217530636307	0.294	0.123	7.231476896583398e-193	Neuron
Trpc4	3.281546727655221e-197	2.5296421825418633	0.12	0.014	8.231431811650356e-193	Neuron
Baz1b	3.343720650846496e-197	0.3931315435960233	0.451	0.231	8.38738888058335e-193	Neuron
Hspa4	4.05834661096685e-197	0.44536264337957454	0.474	0.253	1.0179956638949247e-192	Neuron
Dcaf5	5.3440404218216446e-197	0.6179428236933506	0.262	0.099	1.3404990994097413e-192	Neuron
Braf	6.170481621820225e-197	0.3865155278354073	0.484	0.254	1.5478036100173852e-192	Neuron
Scamp5	6.600702921954597e-197	0.36224513732861935	0.351	0.156	1.655720320943091e-192	Neuron
Zfp618	7.151114341833393e-197	2.909190492264316	0.114	0.01	1.7937855215054885e-192	Neuron
Pou6f2	7.56483010580906e-197	3.5454258347991185	0.11	0.009	1.897561983741145e-192	Neuron
AI413582	8.049027649523134e-197	0.9255831731840383	0.209	0.066	2.019018095606383e-192	Neuron
Manf	8.323100922674484e-197	0.4546129899125105	0.339	0.15	2.0877666354436674e-192	Neuron
Smyd5	9.272790737435659e-197	2.811840950098837	0.114	0.01	2.3259868285783605e-192	Neuron
Mia3	1.059039329322651e-196	0.38674466562540516	0.393	0.187	2.6564942536729378e-192	Neuron
N4bp2	1.114394197975539e-196	1.1395402817376579	0.216	0.073	2.795346406201842e-192	Neuron
Tcerg1l	1.7468455531389283e-196	2.588051534386979	0.123	0.016	4.381787385493688e-192	Neuron
Sra1	2.0175867605298828e-196	0.6318619129385545	0.272	0.108	5.060914630113158e-192	Neuron
Kcnd3	2.132497339511444e-196	0.940212	0.226	0.078	5.349156326430506e-192	Neuron
Kcnq3	2.1680407524730527e-196	0.31422400155105457	0.39	0.188	5.438313423503405e-192	Neuron
Glp2r	2.7912152055388358e-196	0.9613125129747203	0.186	0.051	7.001484221573616e-192	Neuron
Prrc2c	2.8480512787407746e-196	0.35739639777371046	0.795	0.534	7.144051827593359e-192	Neuron
Tmtc1	5.761633276109831e-196	1.133013434810936	0.201	0.062	1.44524809097939e-191	Neuron
Pcgf2	6.387281384053229e-196	1.882655083873051	0.141	0.026	1.602185662375912e-191	Neuron
Scmh1	6.581761232343783e-196	0.4577950682356263	0.427	0.218	1.6509689875211146e-191	Neuron
Smim10l2a	1.6427193590098795e-195	2.6024681036207733	0.111	0.009	4.120597240140382e-191	Neuron
Adss	2.0193271983662824e-195	0.5588845960779508	0.309	0.132	5.0652803443819825e-191	Neuron
Slc8a2	2.1778257151215425e-195	2.6117271068595374	0.113	0.01	5.462858023810877e-191	Neuron
Ube2ql1	2.8276540542715916e-195	3.076656416557266	0.108	0.008	7.09288742973486e-191	Neuron
[truncated: 18,503 more rows]

## Sheet: Table 2
sc/snRNA-seq: Neuron marker genes
gene	p_val	avg_log2FC	pct.1	pct.2	p_val_adj	cluster
Gpc5	0	3.0376003975258437	0.718	0.24	0	Seq_AN.Glut_1
Nnat	0	2.0224870578054963	0.916	0.466	0	Seq_AN.Glut_1
Dach1	0	2.4045459299404883	0.55	0.146	0	Seq_AN.Glut_1
Trpc5	0	2.184534066085315	0.619	0.243	0	Seq_AN.Glut_1
Sim1	0	2.259926639207341	0.508	0.135	0	Seq_AN.Glut_1
Ptprk	0	2.0189109759529202	0.554	0.191	0	Seq_AN.Glut_1
Tns1	0	4.313582425736378	0.375	0.032	0	Seq_AN.Glut_1
Nr3c1	0	2.1428477479746544	0.615	0.281	0	Seq_AN.Glut_1
Adam23	0	1.7141320211231443	0.724	0.409	0	Seq_AN.Glut_1
Agtr1a	0	5.38437	0.323	0.012	0	Seq_AN.Glut_1
Zbtb16	0	2.8748721866035107	0.313	0.061	0	Seq_AN.Glut_1
Zbtb20	0	1.4301347425304605	0.825	0.585	0	Seq_AN.Glut_1
Ppp1r17	0	3.274898270775278	0.278	0.04	0	Seq_AN.Glut_1
Calcr	0	2.5329177332724355	0.299	0.065	0	Seq_AN.Glut_1
Gm20713	0	3.30429	0.281	0.05	0	Seq_AN.Glut_1
Ebf3	0	2.858359024507588	0.262	0.036	0	Seq_AN.Glut_1
Pgf	0	4.098944336383016	0.239	0.022	0	Seq_AN.Glut_1
Crh	0	4.974439269390954	0.221	0.02	0	Seq_AN.Glut_1
Fam159a	0	4.631371379068561	0.21	0.015	0	Seq_AN.Glut_1
Ramp1	0	4.865554668864167	0.161	0.012	0	Seq_AN.Glut_1
Rufy4	0	5.067624528306796	0.155	0.006	0	Seq_AN.Glut_1
Gm30373	0	4.657247645337304	0.136	0.008	0	Seq_AN.Glut_1
5330439M10Rik	0	6.229693219079383	0.117	0.002	0	Seq_AN.Glut_1
Fezf2	0	4.5438287538595485	0.102	0.006	0	Seq_AN.Glut_1
Rbms1	4.2912397745834595e-299	2.113394812160583	0.513	0.194	1.076414585056515e-294	Seq_AN.Glut_1
Ghr	3.422896524811327e-297	1.8458824827690046	0.543	0.212	8.585993642836732e-293	Seq_AN.Glut_1
Pde6b	1.5556923903103658e-295	6.339854641335458	0.06	0.001	3.902298791854522e-291	Seq_AN.Glut_1
Tcf4	4.038810265993771e-277	1.5339939273407832	0.638	0.3	1.0130951671218775e-272	Seq_AN.Glut_1
Csgalnact1	2.9179843092445514e-274	2.748927256975753	0.31	0.079	7.3194718413090324e-270	Seq_AN.Glut_1
Cacna2d1	1.2286487945256392e-273	1.288288934943212	0.773	0.459	3.081942636188113e-269	Seq_AN.Glut_1
Sema5a	1.0658143869165677e-269	2.22175	0.463	0.176	2.6734888081415184e-265	Seq_AN.Glut_1
Ephb1	1.776974143862257e-267	2.099968721338705	0.445	0.158	4.4573619424640855e-263	Seq_AN.Glut_1
Dapl1	3.372989743750987e-257	5.348111468689131	0.056	0.002	8.460807473224975e-253	Seq_AN.Glut_1
Pou3f2	1.6210392926069193e-252	2.5148168100336226	0.32	0.09	4.066214961575196e-248	Seq_AN.Glut_1
Nr3c2	1.1309454143545832e-250	2.1026774273993096	0.501	0.216	2.836863477367037e-246	Seq_AN.Glut_1
Kcnip1	1.8190637913407465e-238	1.7504127214819134	0.668	0.398	4.5629396141991285e-234	Seq_AN.Glut_1
Creb3l2	4.611685868691434e-237	2.8614616923168144	0.189	0.034	1.1567952833025593e-232	Seq_AN.Glut_1
Pcdh9	5.590711525336384e-235	1.1156747180309088	0.939	0.807	1.4023740790153786e-230	Seq_AN.Glut_1
Lsamp	9.6481686989474e-233	0.9004598411034408	0.99	0.934	2.420146636443966e-228	Seq_AN.Glut_1
Nxph4	1.6576112249713954e-230	3.369814335018234	0.132	0.017	4.1579519967182486e-226	Seq_AN.Glut_1
Spata13	6.251103071563809e-226	3.385175310136998	0.134	0.018	1.5680266944710657e-221	Seq_AN.Glut_1
Kcnip4	2.275497006681267e-221	1.0233680673156105	0.925	0.722	5.70785669155929e-217	Seq_AN.Glut_1
Rtl4	1.6145439879537377e-217	1.7643719687543973	0.524	0.24	4.0499221393831557e-213	Seq_AN.Glut_1
Bcl11a	1.4784783327673958e-216	2.046540690041885	0.365	0.124	3.7086150499137355e-212	Seq_AN.Glut_1
Gfra1	2.285539863251082e-215	1.9881164824726438	0.375	0.13	5.7330481929790145e-211	Seq_AN.Glut_1
Tent5a	1.5057288269245395e-213	4.439073493647223	0.075	0.005	3.776970189457515e-209	Seq_AN.Glut_1
Pcdh7	2.3151672411980093e-208	1.1613887848804976	0.778	0.517	5.8073655078210864e-204	Seq_AN.Glut_1
3222401L13Rik	9.382349105710483e-207	2.9746738420133765	0.156	0.027	2.3534684496764175e-202	Seq_AN.Glut_1
Gm43670	1.4116013334664714e-206	3.149971038842794	0.106	0.012	3.540860784867297e-202	Seq_AN.Glut_1
Gm10165	1.8033307120796355e-200	10.520397429073082	0.029	0	4.523474758180558e-196	Seq_AN.Glut_1
Gm14114	4.9474922180948066e-198	3.269614188364937	0.102	0.012	1.2410289479869013e-193	Seq_AN.Glut_1
Kcnh1	1.5960361087490826e-193	1.9578711183704107	0.372	0.14	4.003496975186199e-189	Seq_AN.Glut_1
Kcnd2	3.3899882352210214e-190	1.2935094962281353	0.842	0.686	8.50344648922841e-186	Seq_AN.Glut_1
Cd302	2.0798274821411594e-188	3.1295745597596745	0.211	0.053	5.217039256202884e-184	Seq_AN.Glut_1
Neurod2	4.9244779407041216e-188	4.823443183787909	0.049	0.002	1.2352560466462218e-183	Seq_AN.Glut_1
Fmnl2	1.643171242513826e-187	2.105699611894114	0.489	0.249	4.121730744721682e-183	Seq_AN.Glut_1
Stk32a	6.819225442418315e-187	1.870171354460043	0.353	0.127	1.7105345099762102e-182	Seq_AN.Glut_1
Acot12	2.837899650941058e-183	4.627106064537028	0.065	0.005	7.11858748442055e-179	Seq_AN.Glut_1
Fstl4	1.2152812972232827e-182	1.7305490212976917	0.466	0.214	3.0484116059548826e-178	Seq_AN.Glut_1
Pex5l	9.187536032005236e-178	1.5365405634766682	0.512	0.253	2.3046015382681933e-173	Seq_AN.Glut_1
Best3	7.858562416469176e-175	3.962655254611328	0.065	0.005	1.971241796547128e-170	Seq_AN.Glut_1
Nrn1	9.604412875151923e-173	1.8112401890334997	0.419	0.18	2.4091709256031085e-168	Seq_AN.Glut_1
Sphkap	1.0782148670457126e-171	1.8620153207207513	0.514	0.274	2.7045941724974655e-167	Seq_AN.Glut_1
5330429C05Rik	2.232642842450049e-169	4.440467141154295	0.05	0.003	5.600361306001703e-165	Seq_AN.Glut_1
Arnt2	2.820512929601524e-169	1.6374304145958163	0.501	0.262	7.074974632612463e-165	Seq_AN.Glut_1
Dock1	4.4453162223355057e-169	2.742384274357321	0.207	0.054	1.1150631212106382e-164	Seq_AN.Glut_1
Tmcc3	1.5917665615898296e-168	1.621408583699202	0.506	0.263	3.992787243091929e-164	Seq_AN.Glut_1
Uncx	1.413492464967444e-165	2.85965	0.181	0.043	3.545604499124336e-161	Seq_AN.Glut_1
Fam46a	5.41356571861224e-161	2.3453866564345427	0.251	0.079	1.3579388248566943e-156	Seq_AN.Glut_1
Scgn	1.8683879529616672e-158	3.5783625322677475	0.085	0.01	4.686664341209046e-154	Seq_AN.Glut_1
Lmo3	1.759447969418597e-155	1.8442048475914663	0.357	0.145	4.413399286489609e-151	Seq_AN.Glut_1
Lpcat2	2.6452427039999627e-154	2.2178186904226824	0.233	0.07	6.635326798713506e-150	Seq_AN.Glut_1
Ern1	1.0625462765921659e-153	2.156643525827801	0.243	0.076	2.6652910802037887e-149	Seq_AN.Glut_1
Ucp2	2.0011041130793e-152	3.0206537887803506	0.105	0.016	5.019569557248116e-148	Seq_AN.Glut_1
Htra1	3.135814397043116e-151	3.371423527193082	0.087	0.011	7.865876833542952e-147	Seq_AN.Glut_1
Thrb	3.230555510153466e-151	2.054195893497261	0.396	0.184	8.103525441668954e-147	Seq_AN.Glut_1
Shisal2a	5.2920485948888245e-151	4.93041	0.037	0.001	1.3274574695419127e-146	Seq_AN.Glut_1
Otp	3.920502220083798e-148	1.9593834495521418	0.243	0.077	9.834187768858198e-144	Seq_AN.Glut_1
Hcrtr2	2.9426321850991317e-146	2.474652843426996	0.191	0.052	7.381298573102662e-142	Seq_AN.Glut_1
Baz2b	4.242248585696233e-145	1.089736698622077	0.677	0.456	1.064125635236043e-140	Seq_AN.Glut_1
Kcnd3	3.2602792214667913e-143	1.7227986954082686	0.427	0.214	8.178084399127299e-139	Seq_AN.Glut_1
Megf10	5.493724765444363e-143	3.3616213962816137	0.065	0.006	1.378045920164064e-138	Seq_AN.Glut_1
Fyb2	8.841322758847041e-143	3.295674281269943	0.181	0.049	2.2177574008291917e-138	Seq_AN.Glut_1
C230057M02Rik	3.9890569730813267e-141	2.8440870588881224	0.116	0.021	1.00061505112772e-136	Seq_AN.Glut_1
Ptbp3	6.404178809257669e-141	1.6956404196723158	0.322	0.128	1.6064242125141937e-136	Seq_AN.Glut_1
Hoga1	8.123493987130515e-139	2.6197123237475544	0.131	0.027	2.0376972317318184e-134	Seq_AN.Glut_1
Luzp2	2.0617997497177406e-138	1.0899191706592757	0.658	0.424	5.171818492191981e-134	Seq_AN.Glut_1
Ccser1	1.1504758909347792e-137	1.0606931084949491	0.758	0.597	2.8858537248208003e-133	Seq_AN.Glut_1
Rab3b	3.1452190405997055e-136	1.3494717400127914	0.451	0.227	7.889467441440301e-132	Seq_AN.Glut_1
Rgs6	4.2600589850772055e-136	2.149741717109884	0.283	0.108	1.0685931958167662e-131	Seq_AN.Glut_1
Dscaml1	8.213020132046345e-135	1.5323627496085126	0.373	0.165	2.060153969922505e-130	Seq_AN.Glut_1
Gm42583	2.630030527274912e-124	3.3119272316824864	0.073	0.01	6.597168574616388e-120	Seq_AN.Glut_1
Depdc1b	5.183203579707071e-122	5.636292908029733	0.026	0.001	1.3001547859337216e-117	Seq_AN.Glut_1
Gm42772	7.482942027104058e-122	3.039558917709755	0.065	0.008	1.8770211780787817e-117	Seq_AN.Glut_1
Smc6	9.073740190144348e-122	1.1897003534693058	0.641	0.456	2.2760569892958083e-117	Seq_AN.Glut_1
Tut4	1.7956711118651694e-121	2.380163653497224	0.146	0.037	4.504261417002591e-117	Seq_AN.Glut_1
Sv2c	4.868405068866372e-121	2.1439361765849765	0.213	0.07	1.2211907274744407e-116	Seq_AN.Glut_1
Rab31	3.8065180359008955e-119	1.9633352069072614	0.248	0.092	9.548269841253805e-115	Seq_AN.Glut_1
Adamts1	1.693546322752024e-118	4.094581337838072	0.049	0.004	4.2480915959911774e-114	Seq_AN.Glut_1
Adamts5	2.4793975318076875e-118	3.3623601830261443	0.077	0.011	6.219320768786403e-114	Seq_AN.Glut_1
Klf4	2.66744555622628e-118	3.928431550190322	0.052	0.005	6.691020433238002e-114	Seq_AN.Glut_1
Carmil1	8.718749362255813e-118	1.7456810046156281	0.364	0.177	2.1870110900282482e-113	Seq_AN.Glut_1
Maml3	8.608334784944996e-117	1.484465238971556	0.377	0.183	2.159314697455603e-112	Seq_AN.Glut_1
Antxr2	2.0188741409217787e-116	3.300747320168717	0.065	0.008	5.06414389508819e-112	Seq_AN.Glut_1
Asic2	9.722625155169058e-116	1.0336331402619607	0.74	0.577	2.4388232939226066e-111	Seq_AN.Glut_1
2900064K03Rik	1.9742211436081465e-113	3.1851075835433877	0.064	0.008	4.952136316626674e-109	Seq_AN.Glut_1
Svil	2.485703471444848e-112	2.3862107295159447	0.128	0.031	6.2351385877722565e-108	Seq_AN.Glut_1
Slc10a6	1.086955772627402e-111	8.594950334056369	0.017	0	2.726519860058575e-107	Seq_AN.Glut_1
Pkib	1.1977630781272589e-111	1.4891825644932757	0.355	0.169	3.004468905174416e-107	Seq_AN.Glut_1
Rgs13	5.879523863959096e-111	4.682286967575153	0.029	0.001	1.4748197660354998e-106	Seq_AN.Glut_1
Btg2	2.867957780847847e-110	2.561732068103903	0.179	0.057	7.193985297478739e-106	Seq_AN.Glut_1
Trh	5.566361714822578e-110	3.3538832257231808	0.14	0.037	1.3962661725460957e-105	Seq_AN.Glut_1
Sh3rf1	1.0202113004124325e-109	1.6292883450241704	0.354	0.172	2.5590980259545457e-105	Seq_AN.Glut_1
Egfr	1.3608364163512093e-108	4.053535974617218	0.049	0.005	3.4135220667753733e-104	Seq_AN.Glut_1
Grm3	4.0175827042028004e-108	1.6351195616679126	0.363	0.18	1.0077704455222305e-103	Seq_AN.Glut_1
Slc12a7	8.127998942801916e-108	3.6797367577664035	0.048	0.005	2.0388272548124325e-103	Seq_AN.Glut_1
Gm33609	2.8935504091919065e-107	6.1608127467458305	0.021	0	7.258181846416978e-103	Seq_AN.Glut_1
Ift57	2.6659533354058743e-106	1.8874785935722667	0.325	0.157	6.687277346532095e-102	Seq_AN.Glut_1
Airn	4.453361422974946e-106	1.6102787843545336	0.298	0.13	1.1170811793390354e-101	Seq_AN.Glut_1
Csmd1	2.6235928872638507e-105	0.9944193417167879	0.785	0.659	6.581020398412644e-101	Seq_AN.Glut_1
Fuca1	4.001900721745193e-104	1.7767300977486222	0.329	0.16	1.0038367770425644e-99	Seq_AN.Glut_1
Setx	5.618949879585408e-104	1.348231676050236	0.559	0.387	1.4094573877952037e-99	Seq_AN.Glut_1
Dlk1	3.4882163893887527e-103	1.3405386199151077	0.457	0.244	8.749841991142746e-99	Seq_AN.Glut_1
Peak1	7.261479704241005e-102	1.7476408657700944	0.275	0.119	1.8214695690118135e-97	Seq_AN.Glut_1
Ctnnd2	4.063987222738658e-100	0.8462937813109397	0.769	0.656	1.019410554951765e-95	Seq_AN.Glut_1
Cplane1	9.851867113942414e-100	1.836560918172403	0.142	0.039	2.4712423468613152e-95	Seq_AN.Glut_1
Gm47283	4.894258563270957e-99	2.4034023465619248	0.118	0.029	1.2276758180108867e-94	Seq_AN.Glut_1
Morc4	2.117142174278822e-98	2.1386042763543176	0.173	0.056	5.310639429960997e-94	Seq_AN.Glut_1
E230001N04Rik	2.4255325531037136e-98	2.4442616988243144	0.096	0.02	6.084205856205355e-94	Seq_AN.Glut_1
Gm31938	5.191213539078584e-98	3.8193209756377247	0.042	0.004	1.3021640041424721e-93	Seq_AN.Glut_1
Grid2	1.0096211335691579e-97	0.7845317874824622	0.817	0.706	2.5325336514448757e-93	Seq_AN.Glut_1
Cpt1a	1.7517000349513024e-94	3.5892664233185996	0.043	0.004	4.393964367671847e-90	Seq_AN.Glut_1
Fa2h	3.678722070757325e-94	4.230765789682643	0.033	0.002	9.227706442287674e-90	Seq_AN.Glut_1
B2m	5.09121520300866e-93	2.392496731324084	0.177	0.062	1.2770804215226922e-88	Seq_AN.Glut_1
Grik4	5.446752324487352e-93	1.403859040504401	0.352	0.181	1.3662633530744076e-88	Seq_AN.Glut_1
Kif17	1.4550802413130276e-92	1.5196107359885158	0.279	0.124	3.6499232773095983e-88	Seq_AN.Glut_1
9330162G02Rik	2.123500028801011e-92	1.1174340579317492	0.147	0.042	5.326587472244457e-88	Seq_AN.Glut_1
Thoc2l	6.657880092162214e-92	2.067738069264413	0.123	0.033	1.6700626423179697e-87	Seq_AN.Glut_1
Gpd1	2.0678219962215988e-91	3.2943809710980747	0.047	0.005	5.186924695322259e-87	Seq_AN.Glut_1
Mast4	8.916933249489892e-91	1.053058467355608	0.552	0.37	2.2367235363020443e-86	Seq_AN.Glut_1
Snd1	1.2945191732825742e-90	1.3093972276404116	0.409	0.237	3.247171894262009e-86	Seq_AN.Glut_1
Map2	1.9366793123822305e-90	0.5187651326593867	0.918	0.859	4.857966387179587e-86	Seq_AN.Glut_1
1700016P03Rik	4.614849637901382e-90	2.0848456356669107	0.182	0.064	1.1575888831711826e-85	Seq_AN.Glut_1
Rbms3	8.088663363403484e-90	1.1947261489342218	0.506	0.336	2.02896031807613e-85	Seq_AN.Glut_1
Ecpas	1.5617708611541043e-89	1.9947773179834858	0.124	0.034	3.9175460281189555e-85	Seq_AN.Glut_1
Dab1	1.5632580862180514e-89	0.8782158798937689	0.629	0.445	3.9212765834693604e-85	Seq_AN.Glut_1
Srrm4	2.4921138525111006e-89	1.0716648828809419	0.565	0.393	6.251218387638845e-85	Seq_AN.Glut_1
4632427E13Rik	5.61271904163454e-89	1.9112716975513484	0.128	0.035	1.407894444403608e-84	Seq_AN.Glut_1
Ncoa1	8.839237403042206e-89	1.2042891654468857	0.522	0.362	2.217234310179107e-84	Seq_AN.Glut_1
Sec24d	2.0957965756331262e-88	1.6536742775117352	0.229	0.093	5.257096130318134e-84	Seq_AN.Glut_1
Atrnl1	7.3615445336609e-87	1.4266570791172344	0.415	0.25	1.8465698308235e-82	Seq_AN.Glut_1
Ppfia2	1.2604680758368646e-86	0.9471692484413796	0.72	0.633	3.161758121429191e-82	Seq_AN.Glut_1
Gm11417	2.9036275955176235e-85	1.856453838350842	0.207	0.082	7.283459460596407e-81	Seq_AN.Glut_1
Limch1	3.8211403383300516e-85	0.9736797621943926	0.587	0.422	9.584948424667102e-81	Seq_AN.Glut_1
Tead4	2.3276801726517676e-84	4.584297917537425	0.021	0.001	5.838752945079694e-80	Seq_AN.Glut_1
Dpp6	4.367940683244166e-84	0.7468586250754572	0.82	0.755	1.0956542409849665e-79	Seq_AN.Glut_1
Trim10	1.45797410295759e-83	9.759795500459937	0.012	0	3.6571822398588187e-79	Seq_AN.Glut_1
Cxcl14	1.9185397996614086e-83	2.829246767406692	0.091	0.021	4.8124652334706775e-79	Seq_AN.Glut_1
Pld5	2.030589621565724e-83	1.2348093702292784	0.367	0.196	5.0935310067354623e-79	Seq_AN.Glut_1
Kcnq3	1.1250588111790683e-82	1.268282267743839	0.533	0.381	2.822097521961575e-78	Seq_AN.Glut_1
Gm22146	2.107732054979177e-82	4.688075159607511	0.026	0.002	5.287035086709768e-78	Seq_AN.Glut_1
Hipk2	2.8437159873731154e-82	1.5452176744816761	0.325	0.172	7.133177182726723e-78	Seq_AN.Glut_1
Ifi35	3.7273542325031935e-82	2.7455262649536616	0.062	0.011	9.34969535681101e-78	Seq_AN.Glut_1
Tnr	3.863895841874104e-82	1.2206174759655504	0.495	0.333	9.692196329757002e-78	Seq_AN.Glut_1
Cdc14b	6.688324627499642e-82	1.420541049486165	0.342	0.184	1.6776993495620102e-77	Seq_AN.Glut_1
Neurod1	9.239103376435716e-82	2.4712885994134384	0.115	0.032	2.317536690945135e-77	Seq_AN.Glut_1
Hcn1	1.1698652201440204e-81	1.0333738675918815	0.424	0.248	2.934489918209261e-77	Seq_AN.Glut_1
Tasor	1.5144358750223497e-81	2.3316763050731266	0.091	0.021	3.798810948906062e-77	Seq_AN.Glut_1
6820431F20Rik	4.242308247280697e-81	2.1591845241276317	0.108	0.029	1.0641406007478902e-76	Seq_AN.Glut_1
Cartpt	6.565746326449037e-81	1.7518090093089114	0.151	0.05	1.6469518085264762e-76	Seq_AN.Glut_1
Fgfr4	7.42053883928607e-81	6.070428539861515	0.016	0	1.861367962446518e-76	Seq_AN.Glut_1
Fkbp5	9.825032475479225e-81	1.7804010329176638	0.226	0.098	2.4645111461492088e-76	Seq_AN.Glut_1
Igdcc3	1.0154740216266053e-80	2.9067583282115845	0.067	0.012	2.5472150358481768e-76	Seq_AN.Glut_1
Serpini1	2.4716002291757514e-80	1.332914700958831	0.452	0.297	6.199762014864455e-76	Seq_AN.Glut_1
Ptprn	4.360003547137194e-80	0.8863460077715979	0.642	0.515	1.0936632897638937e-75	Seq_AN.Glut_1
Gm49599	3.025206529513632e-79	2.2891165717455535	0.095	0.023	7.588428058631995e-75	Seq_AN.Glut_1
Tmtc2	6.929495805263397e-79	1.1398856030587154	0.378	0.211	1.7381947277922705e-74	Seq_AN.Glut_1
Prkcq	7.582841781577078e-79	2.956440808332423	0.059	0.01	1.9020800324907942e-74	Seq_AN.Glut_1
Rgs2	1.1212136566764225e-78	1.8038267289405296	0.364	0.216	2.812452336407138e-74	Seq_AN.Glut_1
Msi2	6.438223212066377e-78	0.8241538726790083	0.59	0.426	1.6149639105147298e-73	Seq_AN.Glut_1
Nectin1	8.914778428965273e-78	1.7968359636386992	0.201	0.082	2.236183021121649e-73	Seq_AN.Glut_1
Mcc	1.781169451028815e-77	1.5098165931484038	0.189	0.073	4.46788545096068e-73	Seq_AN.Glut_1
Stxbp5	5.014186515382164e-77	1.2037675420574803	0.436	0.277	1.2577585455184618e-72	Seq_AN.Glut_1
Mdm1	5.989731626619921e-77	1.9184491604046872	0.177	0.068	1.502464281221341e-72	Seq_AN.Glut_1
Susd1	2.973200201234593e-76	1.7016163901208978	0.176	0.067	7.457975384776853e-72	Seq_AN.Glut_1
Pcdh15	7.810889263064414e-76	0.7937151779578455	0.689	0.547	1.9592834627470775e-71	Seq_AN.Glut_1
Sowaha	1.3266898054627847e-75	2.546758038399168	0.131	0.042	3.327868708022849e-71	Seq_AN.Glut_1
A930017M01Rik	1.989745739440822e-75	1.9187206874294909	0.112	0.032	4.991078212813358e-71	Seq_AN.Glut_1
Nfix	2.3111499471151095e-75	1.9951912125692455	0.124	0.038	5.797288527343541e-71	Seq_AN.Glut_1
CT010467.1	2.7948466614827154e-75	2.095967577381664	0.086	0.02	7.010593365663243e-71	Seq_AN.Glut_1
Glb1l2	4.831123534958386e-75	3.5911862973490285	0.043	0.005	1.2118390275089617e-70	Seq_AN.Glut_1
Prkn	5.457059187668273e-75	1.7387749576859595	0.126	0.038	1.3688487266347097e-70	Seq_AN.Glut_1
Calcrl	1.610919683267834e-74	2.3734520736702653	0.069	0.014	4.0408309335090346e-70	Seq_AN.Glut_1
Ly75	1.6255084201849138e-74	2.3517494088088773	0.062	0.011	4.077425321191838e-70	Seq_AN.Glut_1
Sema3e	2.740138543654987e-74	2.1807270096429887	0.113	0.033	6.87336352290417e-70	Seq_AN.Glut_1
Gm44148	3.0790652154548597e-74	2.1804145384064872	0.094	0.024	7.72352718644697e-70	Seq_AN.Glut_1
Gabrb1	4.088495575814026e-74	0.588919	0.87	0.838	1.0255582302371903e-69	Seq_AN.Glut_1
Klc3	7.720911692516994e-74	3.3451841637931135	0.038	0.004	1.9367134889509627e-69	Seq_AN.Glut_1
Rmst	2.6782126538769373e-73	1.7987916883078765	0.121	0.037	6.718028620984909e-69	Seq_AN.Glut_1
Lima1	4.449747089630962e-73	1.9208916964585343	0.199	0.084	1.1161745599630306e-68	Seq_AN.Glut_1
Gm20696	9.81768575244868e-73	1.4266071391869013	0.297	0.154	2.462668294144227e-68	Seq_AN.Glut_1
Gm43362	9.904992780914956e-73	2.2734225945729083	0.085	0.02	2.4845683891647075e-68	Seq_AN.Glut_1
Gm15844	1.0291483160094534e-72	7.94017	0.011	0	2.581515635878113e-68	Seq_AN.Glut_1
Gm3764	1.880926596737911e-72	1.310418880500108	0.219	0.094	4.7181162752573756e-68	Seq_AN.Glut_1
Cop1	2.0928736265822408e-72	2.4538206691183095	0.085	0.021	5.2497642049188926e-68	Seq_AN.Glut_1
Tasor2	4.971898210701977e-72	2.1262575559920576	0.09	0.023	1.2471509471724839e-67	Seq_AN.Glut_1
Magi2	6.921212362628777e-72	0.7899664292724564	0.806	0.75	1.7361169090418024e-67	Seq_AN.Glut_1
Cd63	7.411101526363413e-72	1.761595148270756	0.203	0.086	1.8590007068729987e-67	Seq_AN.Glut_1
Dock10	1.2371537304842379e-71	1.0710833936421638	0.47	0.309	3.1032764175466625e-67	Seq_AN.Glut_1
Gnas	1.2862235352689462e-70	0.4827	0.966	0.902	3.2263631158686247e-66	Seq_AN.Glut_1
C230086J09Rik	1.6375402833743507e-70	3.105113051029194	0.044	0.006	4.107606046816221e-66	Seq_AN.Glut_1
Npffr1	3.8608907769059654e-70	1.615539044035829	0.192	0.079	9.684658424790923e-66	Seq_AN.Glut_1
Cxcl2	3.4972615076244987e-69	8.422295460236171	0.011	0	8.772530765725292e-65	Seq_AN.Glut_1
Cntn4	1.434032591605444e-68	0.6757467103561767	0.595	0.417	3.5971273527830955e-64	Seq_AN.Glut_1
Tbc1d8b	2.5346963557719264e-68	3.3391337907376673	0.048	0.008	6.3580323388183e-64	Seq_AN.Glut_1
Irak3	2.8389947593521824e-68	4.932756614336606	0.018	0.001	7.121334454359014e-64	Seq_AN.Glut_1
Ppara	3.2079812460840783e-68	3.9411772785258607	0.025	0.002	8.046900157677302e-64	Seq_AN.Glut_1
Sstr2	4.277017011840281e-68	2.3312577471446483	0.121	0.039	1.0728469472500161e-63	Seq_AN.Glut_1
Cntn3	6.004329515741199e-68	1.2879509205656974	0.45	0.306	1.5061260157285224e-63	Seq_AN.Glut_1
Gm12064	1.1427122509228125e-67	2.0896785008052086	0.081	0.02	2.8663794102147826e-63	Seq_AN.Glut_1
4930441H08Rik	3.265180471206324e-67	6.257972493731553	0.012	0	8.190378693973943e-63	Seq_AN.Glut_1
Plxnd1	4.378526522167472e-67	3.011536521678508	0.058	0.011	1.0983095928204888e-62	Seq_AN.Glut_1
Nhlh2	1.0465181315597484e-66	1.9517199057334282	0.151	0.057	2.625086081204473e-62	Seq_AN.Glut_1
Adcy2	2.8728948384163885e-65	0.9454106784769848	0.415	0.258	7.206369412683669e-61	Seq_AN.Glut_1
Usp29	6.4217194309877626e-65	0.7007234681771006	0.771	0.695	1.6108241020689704e-60	Seq_AN.Glut_1
Adgrl2	6.913228751043983e-65	1.0784805968925861	0.425	0.277	1.7341142999118727e-60	Seq_AN.Glut_1
4930505G20Rik	1.3480086035610188e-64	3.8436493875507645	0.031	0.003	3.3813447811724596e-60	Seq_AN.Glut_1
Relch	1.6095211032914364e-64	2.009753722556593	0.091	0.025	4.037322735496239e-60	Seq_AN.Glut_1
Pld1	2.0645273530458676e-64	2.801697712486525	0.059	0.012	5.178660412380255e-60	Seq_AN.Glut_1
Dop1a	2.482206356096704e-64	2.051952040469338	0.097	0.028	6.226366423632972e-60	Seq_AN.Glut_1
Zup1	3.9650710221837765e-64	2.257037951747379	0.078	0.019	9.945984152045785e-60	Seq_AN.Glut_1
Eif2ak2	3.179997496869102e-63	2.105749009131576	0.092	0.026	7.976705721146455e-59	Seq_AN.Glut_1
Wdsub1	3.520960668881218e-63	1.8081527059067608	0.191	0.085	8.831977741821647e-59	Seq_AN.Glut_1
Tpmt	5.795781284706086e-63	2.5306597475836683	0.099	0.029	1.4538137774556747e-58	Seq_AN.Glut_1
Setd7	6.783228275294165e-63	1.1986623486175896	0.376	0.235	1.7015049805747885e-58	Seq_AN.Glut_1
Cyp4v3	6.939689683221024e-63	3.4538600775264308	0.031	0.004	1.7407517601391616e-58	Seq_AN.Glut_1
Fat3	1.2100610851771217e-62	1.175623765478061	0.398	0.253	3.0353172260582922e-58	Seq_AN.Glut_1
Fkbp11	1.963963036867776e-62	2.4457671127336926	0.102	0.032	4.9264048816791295e-58	Seq_AN.Glut_1
Slc4a4	2.128012430420947e-62	2.8599513662452622	0.062	0.013	5.337906380467903e-58	Seq_AN.Glut_1
Gm43519	3.3408111154326568e-62	6.163770377293497	0.012	0	8.380090601951277e-58	Seq_AN.Glut_1
9630014M24Rik	1.039270202875625e-61	2.8660114175939158	0.04	0.006	2.606905376893218e-57	Seq_AN.Glut_1
Bbx	1.8503878151543047e-61	1.2164964660167326	0.351	0.214	4.641512795533058e-57	Seq_AN.Glut_1
Edn3	4.449992539762183e-61	3.954989566788906	0.02	0.001	1.116236128673946e-56	Seq_AN.Glut_1
Tmem229b	6.52051141217324e-61	1.7765518765483863	0.152	0.06	1.6356050826295355e-56	Seq_AN.Glut_1
Slc2a13	1.9943780111180444e-60	0.9875507892573059	0.435	0.292	5.002697803088502e-56	Seq_AN.Glut_1
Alk	2.4251748844142127e-60	1.6321066910770419	0.315	0.184	6.083308680064611e-56	Seq_AN.Glut_1
Gm17922	3.751165555457106e-60	3.0387004580128694	0.041	0.006	9.409423679308605e-56	Seq_AN.Glut_1
Gm48321	4.82362342537995e-60	3.24914	0.038	0.005	1.2099577000223066e-55	Seq_AN.Glut_1
Tesc	7.638615803445843e-60	2.042069408731561	0.125	0.045	1.9160703881363553e-55	Seq_AN.Glut_1
Rsad2	9.292704233053342e-60	3.733350686538627	0.029	0.003	2.3309819298191005e-55	Seq_AN.Glut_1
Nebl	1.9889853664551587e-59	0.9641485475869493	0.555	0.441	4.98917089321612e-55	Seq_AN.Glut_1
Cdh4	3.7107982180175535e-59	0.9437621846685325	0.408	0.259	9.308166250075231e-55	Seq_AN.Glut_1
Fos	5.8634506405960184e-58	1.917956094478656	0.159	0.066	1.4707879586871053e-53	Seq_AN.Glut_1
Pde10a	6.55855162005211e-58	1.0888335091073065	0.514	0.384	1.6451470883738713e-53	Seq_AN.Glut_1
Ryr1	8.355720511778782e-58	1.6234699963744004	0.147	0.058	2.0959489331745895e-53	Seq_AN.Glut_1
Tnpo1	1.1225391681486954e-57	1.0597094208475777	0.35	0.211	2.8157772493841876e-53	Seq_AN.Glut_1
Mc4r	1.1427309207599208e-57	3.100345218477282	0.049	0.009	2.8664262416341853e-53	Seq_AN.Glut_1
Catspere2	1.3916856338617408e-57	2.118571918905831	0.067	0.016	3.490904243978791e-53	Seq_AN.Glut_1
Pou3f4	1.570172905290265e-57	2.297120076478288	0.086	0.025	3.938621715630101e-53	Seq_AN.Glut_1
Kcnk2	1.7262922885324913e-57	1.1952294805105017	0.416	0.289	4.330231576554901e-53	Seq_AN.Glut_1
Clvs1	3.9450770042318076e-57	1.1201309170701546	0.472	0.357	9.895831157415065e-53	Seq_AN.Glut_1
4930419G24Rik	1.555782087743394e-56	1.5468175730284877	0.169	0.072	3.9025237888955296e-52	Seq_AN.Glut_1
Arhgef28	1.6580057101225718e-56	1.4670188927265557	0.311	0.186	4.158941523271459e-52	Seq_AN.Glut_1
Mrtfa	1.961717254374252e-56	2.219193690183782	0.071	0.018	4.9207715608723736e-52	Seq_AN.Glut_1
Grid1	2.918882049390597e-56	0.9343763047954552	0.496	0.362	7.321723732691373e-52	Seq_AN.Glut_1
Cacna1c	6.230029215118014e-56	0.8818012769529429	0.532	0.411	1.5627405283202027e-51	Seq_AN.Glut_1
1810034E14Rik	7.447957585976367e-56	1.5132054004675377	0.194	0.089	1.868245680866312e-51	Seq_AN.Glut_1
Diaph3	7.595420729745163e-56	1.7505466818028337	0.128	0.047	1.9052353358492767e-51	Seq_AN.Glut_1
Itga4	9.120506702179633e-56	2.1383455117029824	0.085	0.025	2.2877879011747394e-51	Seq_AN.Glut_1
Tut7	1.1845662660260392e-55	2.4525228974449456	0.059	0.013	2.971366021699717e-51	Seq_AN.Glut_1
Dgkd	1.7264159038146844e-55	1.2029328666400718	0.326	0.195	4.3305416531287544e-51	Seq_AN.Glut_1
Gm14172	1.8570468548564453e-55	2.5015557734413005	0.058	0.013	4.6582163307219073e-51	Seq_AN.Glut_1
Trim25	2.7097574522687832e-55	2.4801887382162566	0.048	0.009	6.797155593271016e-51	Seq_AN.Glut_1
Wscd2	2.869231812565091e-55	1.4113304795144683	0.252	0.135	7.197181078638275e-51	Seq_AN.Glut_1
Tmem176b	5.205938103342781e-55	1.6452379600048221	0.208	0.102	1.3058575138425032e-50	Seq_AN.Glut_1
Gm5067	1.40335157747756e-54	5.296764710960563	0.011	0	3.520167096944711e-50	Seq_AN.Glut_1
Cerkl	3.052144205266988e-54	1.9610663461794238	0.094	0.03	7.655998524491713e-50	Seq_AN.Glut_1
Ckmt2	3.1702561933390976e-54	2.149552865399483	0.07	0.018	7.952270635371793e-50	Seq_AN.Glut_1
Khdc4	3.480250902565279e-54	2.207588558706347	0.067	0.017	8.729861363994746e-50	Seq_AN.Glut_1
Myrip	4.961370452631499e-54	1.5074856233454579	0.259	0.143	1.2445101643380853e-49	Seq_AN.Glut_1
Kcna5	8.950380175888289e-54	2.704974244774145	0.07	0.018	2.2451133633198184e-49	Seq_AN.Glut_1
Nell2	9.539015684725239e-54	0.8703185925264615	0.522	0.391	2.3927666943564788e-49	Seq_AN.Glut_1
Chil1	2.658463007299652e-53	3.0330650952602776	0.037	0.006	6.668488607510448e-49	Seq_AN.Glut_1
Gm4128	7.778303384309202e-53	3.1286843345300595	0.025	0.003	1.9511096209201205e-48	Seq_AN.Glut_1
Mrtfb	8.510896144661445e-53	1.7798983709173015	0.089	0.028	2.134873188926877e-48	Seq_AN.Glut_1
Eda	1.2125166390821383e-52	1.3645282773484766	0.248	0.133	3.041476737473636e-48	Seq_AN.Glut_1
Rasd1	1.4228715108046443e-52	2.084476018104653	0.127	0.049	3.56913089770237e-48	Seq_AN.Glut_1
Egfem1	1.5192356438813434e-52	0.7733034416848488	0.478	0.335	3.810850689111962e-48	Seq_AN.Glut_1
Klhdc10	3.765467027547693e-52	0.8506278108067382	0.532	0.408	9.445297491900634e-48	Seq_AN.Glut_1
Castor2	3.8384795302583034e-52	2.5898204700588394	0.052	0.011	9.628442053699928e-48	Seq_AN.Glut_1
5330406M23Rik	5.199040759122352e-52	2.5751	0.046	0.009	1.3041273840182506e-47	Seq_AN.Glut_1
Zdbf2	1.0942094419412062e-51	0.9283024510258592	0.49	0.364	2.7447149641653215e-47	Seq_AN.Glut_1
Vat1l	1.1505476232097885e-51	0.8841783193787249	0.468	0.339	2.8860336580594333e-47	Seq_AN.Glut_1
Rxrg	1.7274907035530228e-51	1.6711322510890607	0.183	0.087	4.3332376807924026e-47	Seq_AN.Glut_1
Cmtm8	2.023898070688396e-51	2.515241479883095	0.061	0.015	5.076745920514772e-47	Seq_AN.Glut_1
Gpx7	2.761331836777606e-51	1.9759138841332224	0.107	0.038	6.926524779372948e-47	Seq_AN.Glut_1
Gm42809	3.46751092526548e-51	5.858149460548805	0.01	0	8.69790440493593e-47	Seq_AN.Glut_1
Apbb3	3.5465672309461977e-51	2.883765991938332	0.037	0.006	8.896209242105443e-47	Seq_AN.Glut_1
Wdfy3	6.950565179428954e-51	0.8678747620535702	0.513	0.39	1.7434797696079587e-46	Seq_AN.Glut_1
Kiz	7.648704601982194e-51	1.1354229397605442	0.286	0.165	1.9186010623612134e-46	Seq_AN.Glut_1
Pla2r1	1.2464428398834072e-50	2.555186825461746	0.041	0.007	3.1265772195635386e-46	Seq_AN.Glut_1
Gm32509	1.2873005258689953e-50	1.835716306252019	0.098	0.033	3.2290646390897876e-46	Seq_AN.Glut_1
Gm42770	1.2896046944267656e-50	2.179382122778454	0.052	0.012	3.2348444155000986e-46	Seq_AN.Glut_1
Fam155a	1.3536001074460748e-50	0.6550695552610568	0.769	0.717	3.395370509517734e-46	Seq_AN.Glut_1
Gm48700	1.5921331664379826e-50	3.2830415306898573	0.028	0.003	3.993706834693035e-46	Seq_AN.Glut_1
Celsr1	1.6293878432589445e-50	3.6456499262924424	0.02	0.002	4.087156466030736e-46	Seq_AN.Glut_1
Tap2	2.7850905798893567e-50	2.229433221955505	0.068	0.018	6.9861212105944624e-46	Seq_AN.Glut_1
Adarb2	3.0149827753537633e-50	0.6894395482424103	0.408	0.263	7.56278279369738e-46	Seq_AN.Glut_1
5730522E02Rik	4.334187113203225e-50	1.0122368958427954	0.334	0.204	1.087187495475897e-45	Seq_AN.Glut_1
Usp51	4.759098667646285e-50	1.784308428559784	0.133	0.054	1.1937723097923943e-45	Seq_AN.Glut_1
Gm29707	5.297582224353228e-50	3.1306975973413618	0.034	0.005	1.3288455251567637e-45	Seq_AN.Glut_1
Oga	6.12900309572766e-50	1.9858931071575006	0.077	0.023	1.5373991365323264e-45	Seq_AN.Glut_1
Gpr101	7.3934331631324365e-50	1.4285138470865661	0.214	0.109	1.8545687746401405e-45	Seq_AN.Glut_1
Dlgap2	1.442465236877358e-49	0.973659	0.445	0.318	3.618279800183165e-45	Seq_AN.Glut_1
Agap1	1.8975950280332282e-49	0.9482675499982314	0.464	0.348	4.75992736831855e-45	Seq_AN.Glut_1
Mia2	2.731762338741632e-49	2.2264604170975355	0.067	0.018	6.85235265049951e-45	Seq_AN.Glut_1
Ubash3b	3.09424141608104e-49	1.1232060813096951	0.289	0.169	7.761595168097681e-45	Seq_AN.Glut_1
Galnt18	3.370087276785024e-49	0.9799700109353002	0.332	0.203	8.453526925087554e-45	Seq_AN.Glut_1
Gm10649	3.4184887194299176e-49	3.131528014668614	0.035	0.006	8.574937103818005e-45	Seq_AN.Glut_1
Sct	1.1283256848851355e-48	4.194837093512916	0.026	0.003	2.830292147965874e-44	Seq_AN.Glut_1
Cdk14	1.4649407199320963e-48	0.7545178633876155	0.593	0.483	3.6746573018776703e-44	Seq_AN.Glut_1
Ece1	1.519611435284324e-48	1.237882597510424	0.31	0.193	3.811793324267198e-44	Seq_AN.Glut_1
2900027M19Rik	1.9013230026076148e-48	2.1986146466935907	0.062	0.016	4.769278619740941e-44	Seq_AN.Glut_1
Mtrex	2.3541018069246017e-48	2.3075951505585723	0.053	0.012	5.905028972489671e-44	Seq_AN.Glut_1
Gm48678	9.022787704438069e-48	2.156256239387306	0.066	0.018	2.2632760677812453e-43	Seq_AN.Glut_1
Pitpnc1	9.061364089155018e-48	1.053781319874952	0.425	0.304	2.2729525681236446e-43	Seq_AN.Glut_1
Ssh2	1.2611768298492976e-47	0.6471844985673985	0.679	0.608	3.163535959993978e-43	Seq_AN.Glut_1
1700086L19Rik	1.4789111452863303e-47	3.3131587434403746	0.027	0.004	3.709700716836231e-43	Seq_AN.Glut_1
Armh3	2.064525614407788e-47	2.1153286795403146	0.064	0.017	5.178656051180495e-43	Seq_AN.Glut_1
Gm34354	2.745935809256485e-47	4.150788235889587	0.015	0.001	6.887905383938967e-43	Seq_AN.Glut_1
Snhg11	3.5112304755031785e-47	0.45861209653906343	0.993	0.994	8.807570524752172e-43	Seq_AN.Glut_1
Tafa5	5.3237232308745e-47	1.5309134262305297	0.086	0.028	1.3354027352325596e-42	Seq_AN.Glut_1
Nfib	6.1885603385404985e-47	0.9737064576148318	0.196	0.095	1.5523384753194988e-42	Seq_AN.Glut_1
Ston1	7.369815053869026e-47	2.909950171707096	0.035	0.006	1.8486444081125065e-42	Seq_AN.Glut_1
Mosmo	8.688604390960514e-47	2.3130909849572925	0.051	0.012	2.1794495254285355e-42	Seq_AN.Glut_1
Slc35f3	1.1544707363726488e-46	1.3482640656223306	0.312	0.198	2.8958743951171524e-42	Seq_AN.Glut_1
F730043M19Rik	1.865918563947533e-46	2.8676878370579506	0.034	0.006	4.680470125805992e-42	Seq_AN.Glut_1
Cdr1os	2.0131015701976902e-46	1.3219013958473909	0.09	0.03	5.049663978683886e-42	Seq_AN.Glut_1
Rhoj	3.450441058168689e-46	1.705269584562614	0.079	0.025	8.655086350310339e-42	Seq_AN.Glut_1
Elmo1	4.51321702037811e-46	0.9613128257862776	0.472	0.364	1.1320953573916451e-41	Seq_AN.Glut_1
Gm48765	7.923667568954318e-46	2.438874393974395	0.043	0.009	1.987572772996501e-41	Seq_AN.Glut_1
Dapk1	1.0764020543191542e-45	0.9958486722909762	0.397	0.279	2.700046913054166e-41	Seq_AN.Glut_1
Cadm1	1.115386090434671e-45	0.48738617627636893	0.793	0.745	2.797834469246329e-41	Seq_AN.Glut_1
Tent4b	1.679992117416405e-45	2.174958608125847	0.058	0.015	4.214092227327311e-41	Seq_AN.Glut_1
Eml5	2.137410629208452e-45	0.6831118694196303	0.621	0.51	5.361480822306481e-41	Seq_AN.Glut_1
Dnah11	2.201251304144566e-45	2.4808415916222377	0.057	0.015	5.521618771316229e-41	Seq_AN.Glut_1
Kcnmb4	3.872429005940097e-45	1.6158161642025803	0.134	0.057	9.71360091850014e-41	Seq_AN.Glut_1
Rasgrf1	4.0708906235719296e-45	0.3938411364727261	0.839	0.755	1.0211422040167828e-40	Seq_AN.Glut_1
Fam107a	4.3893034112502374e-45	2.501011058578658	0.061	0.017	1.1010128676780096e-40	Seq_AN.Glut_1
Dera	5.666960431907952e-45	2.094571437372164	0.072	0.022	1.4215003547397907e-40	Seq_AN.Glut_1
4930415C11Rik	1.5580637259612604e-44	2.3202861207098935	0.053	0.013	3.908247050201226e-40	Seq_AN.Glut_1
Bmerb1	2.490530557614237e-44	1.8856319986400774	0.071	0.021	6.2472468507195516e-40	Seq_AN.Glut_1
Prdm8	5.346985386038387e-44	2.4890273685202535	0.07	0.021	1.341237814233869e-39	Seq_AN.Glut_1
Aopep	5.632847131341673e-44	1.8552939112056084	0.078	0.025	1.4129433744257452e-39	Seq_AN.Glut_1
Bhlhe22	7.740588958126604e-44	2.673994993162809	0.051	0.012	1.9416493342564775e-39	Seq_AN.Glut_1
Magt1	1.0022800140836476e-43	1.4622432363548516	0.157	0.073	2.5141191873274217e-39	Seq_AN.Glut_1
Siah3	1.1308831632158939e-43	1.828827283331895	0.106	0.041	2.836707326610748e-39	Seq_AN.Glut_1
Cnksr2	1.7126429839751608e-43	1.1228819228688658	0.385	0.276	4.2959936610032933e-39	Seq_AN.Glut_1
Mical2	1.989549558362647e-43	1.1289552285803208	0.286	0.174	4.9905861121968636e-39	Seq_AN.Glut_1
Gpc6	1.999241159565966e-43	0.7560840315342017	0.424	0.296	5.014896524655269e-39	Seq_AN.Glut_1
Itprid2	2.1550165564188596e-43	2.7753378119246275	0.031	0.005	5.4056435301210674e-39	Seq_AN.Glut_1
4930570B17Rik	2.3055005653981817e-43	2.069343041246509	0.065	0.019	5.783117618244799e-39	Seq_AN.Glut_1
Gm37965	2.675414080418437e-43	3.3151673293655146	0.029	0.004	6.711008679321608e-39	Seq_AN.Glut_1
Dclk1	3.4699242738836623e-43	0.6006152071958952	0.681	0.602	8.703958048609779e-39	Seq_AN.Glut_1
Dscam	3.5311527373728946e-43	0.6778094500284513	0.643	0.552	8.857543526426169e-39	Seq_AN.Glut_1
Cxcl1	3.5434291633959887e-43	5.560349825719107	0.011	0.001	8.888337713462498e-39	Seq_AN.Glut_1
Podxl2	6.357505058478113e-43	0.773153	0.603	0.504	1.5947165688686498e-38	Seq_AN.Glut_1
Junb	1.3506526835547157e-42	1.6492946077413686	0.147	0.067	3.387977191428649e-38	Seq_AN.Glut_1
Gm42639	1.525397022122212e-42	2.5280939444418693	0.038	0.007	3.8263058902913565e-38	Seq_AN.Glut_1
Greb1	3.066343868035967e-42	2.2847873023247764	0.052	0.013	7.691616958581419e-38	Seq_AN.Glut_1
Il6ra	3.145365530799333e-42	2.898511701816581	0.029	0.004	7.889834897457047e-38	Seq_AN.Glut_1
Trpc5os	4.239904727394433e-42	2.1460279953297015	0.049	0.012	1.0635377018196195e-37	Seq_AN.Glut_1
Gm15518	6.634362849823348e-42	2.269465941802454	0.051	0.013	1.6641635772496887e-37	Seq_AN.Glut_1
Tmem178b	1.1509174586759175e-41	0.7385265474620337	0.568	0.474	2.8869613533426715e-37	Seq_AN.Glut_1
Fat1	1.2315589948820127e-41	1.7995162119523553	0.124	0.053	3.0892425827620407e-37	Seq_AN.Glut_1
Prxl2c	2.998500475715267e-41	1.9677060273001232	0.061	0.017	7.5214385932841756e-37	Seq_AN.Glut_1
Pcdh17	3.7593876174123854e-41	0.6391334365244012	0.677	0.583	9.430047899517227e-37	Seq_AN.Glut_1
Gns	5.431082567686411e-41	1.1580142852509943	0.337	0.231	1.3623327512784594e-36	Seq_AN.Glut_1
Nfkbiz	1.0361432207457063e-40	2.125226315392406	0.062	0.018	2.5990616549185298e-36	Seq_AN.Glut_1
2610005L07Rik	1.1548216878394271e-40	2.0107787788572686	0.064	0.019	2.896754721776419e-36	Seq_AN.Glut_1
Vps35l	1.7493164827134149e-40	2.0384155031798383	0.059	0.017	4.3879854652383296e-36	Seq_AN.Glut_1
Dock4	1.8059893801154104e-40	0.9606318536098826	0.434	0.324	4.5301437610814956e-36	Seq_AN.Glut_1
Trim35	2.8688399675282055e-40	0.9086929905246051	0.45	0.351	7.19619817454775e-36	Seq_AN.Glut_1
Trib1	2.9454384148621553e-40	3.3637528620288952	0.029	0.005	7.38833771984023e-36	Seq_AN.Glut_1
Cacna1d	3.356257735173709e-40	0.7367363961531155	0.525	0.416	8.418836902909732e-36	Seq_AN.Glut_1
Mest	3.991088253998268e-40	1.0779251093186755	0.307	0.199	1.0011245776329254e-35	Seq_AN.Glut_1
Gm30054	7.0040534267413345e-40	2.146120950171386	0.051	0.013	1.7568967615637963e-35	Seq_AN.Glut_1
Gm32036	1.4300041332725684e-39	1.5469071051315786	0.09	0.033	3.5870223679009105e-35	Seq_AN.Glut_1
Runx2	1.5663425326310705e-39	1.480467723419292	0.151	0.072	3.929013608851777e-35	Seq_AN.Glut_1
Slit3	1.8500105863849682e-39	0.8702966582942744	0.287	0.174	4.6405665548880543e-35	Seq_AN.Glut_1
Cep83	2.22351785507255e-39	1.0540862343063984	0.347	0.235	5.577472187663984e-35	Seq_AN.Glut_1
Gm42769	2.925724739813768e-39	2.0569598867598238	0.04	0.009	7.338887937348856e-35	Seq_AN.Glut_1
Gm42826	2.9845355253099875e-39	1.85863	0.059	0.017	7.486408911687572e-35	Seq_AN.Glut_1
Gm43122	3.674550525515844e-39	2.255108181976513	0.048	0.012	9.217242538203942e-35	Seq_AN.Glut_1
Gm37899	4.432723352187314e-39	1.7547318388191009	0.075	0.025	1.1119043256626659e-34	Seq_AN.Glut_1
Kcnj12	5.010703941869821e-39	1.855579484789158	0.11	0.046	1.2568849767786259e-34	Seq_AN.Glut_1
Gm30332	5.358936362979944e-39	3.447278313966078	0.015	0.001	1.3442355972898891e-34	Seq_AN.Glut_1
Ccdc191	6.517287025569104e-39	1.1286240997205141	0.242	0.141	1.634796277493754e-34	Seq_AN.Glut_1
Sipa1l1	7.665126478973599e-39	1.042022020583222	0.325	0.218	1.9227203259857375e-34	Seq_AN.Glut_1
Ro60	7.858289715852412e-39	1.8496016539982145	0.066	0.02	1.971173392324419e-34	Seq_AN.Glut_1
Gm37376	8.402898257081826e-39	2.5799299960838242	0.038	0.008	2.1077829988064053e-34	Seq_AN.Glut_1
Nsun7	8.413542339714527e-39	0.871409	0.386	0.266	2.110452960493992e-34	Seq_AN.Glut_1
Lrig1	1.0223729654075024e-38	2.165788072568268	0.039	0.008	2.564520346428179e-34	Seq_AN.Glut_1
Hs6st3	1.0434562183715504e-38	0.6991636612377314	0.391	0.265	2.617405578163197e-34	Seq_AN.Glut_1
Spsb1	1.1081411945254408e-38	2.826031261213176	0.024	0.003	2.7796613723476157e-34	Seq_AN.Glut_1
Pcsk2	1.162358686131232e-38	0.39183817175005187	0.668	0.535	2.9156605282915824e-34	Seq_AN.Glut_1
Pdzrn4	1.1637631071990743e-38	0.7873919524276971	0.495	0.382	2.919183378098158e-34	Seq_AN.Glut_1
Gm41836	1.2489507677939032e-38	4.958422944447199	0.01	0	3.1328681059342267e-34	Seq_AN.Glut_1
Tent2	1.3088107898817074e-38	1.8761973659842828	0.061	0.018	3.283020985339275e-34	Seq_AN.Glut_1
Kcnj6	1.6476669761757993e-38	1.001777924062778	0.316	0.207	4.133007843039375e-34	Seq_AN.Glut_1
Sulf1	1.897478898826295e-38	1.1478218635563544	0.189	0.099	4.759636069815878e-34	Seq_AN.Glut_1
Parp4	2.1707521341853048e-38	2.0132778365422106	0.064	0.02	5.445114653390419e-34	Seq_AN.Glut_1
Ube2e2	3.3017563524866843e-38	0.7654161690599139	0.532	0.449	8.2821256345776e-34	Seq_AN.Glut_1
Gm43341	6.678399675501191e-38	1.9610940900484377	0.043	0.01	1.675209774602719e-33	Seq_AN.Glut_1
Fam78b	1.3931814398309473e-37	1.536663013738669	0.135	0.062	3.494656323671948e-33	Seq_AN.Glut_1
Gm2861	2.5108374053084362e-37	3.5368267954959833	0.014	0.001	6.298184547475681e-33	Seq_AN.Glut_1
Gm26917	2.5162943862948436e-37	1.2928668410244386	0.241	0.145	6.311872838581986e-33	Seq_AN.Glut_1
Gm43048	3.863287070311575e-37	2.498124170181945	0.032	0.006	9.690669287169555e-33	Seq_AN.Glut_1
Resf1	6.028178236167229e-37	2.1793522913358654	0.044	0.011	1.5121082287601875e-32	Seq_AN.Glut_1
Dpyd	1.1487666522832065e-36	0.6220299430328449	0.368	0.247	2.8815662705871953e-32	Seq_AN.Glut_1
Lncppara	1.267078704486792e-36	2.4720736593384793	0.04	0.009	3.178340222334669e-32	Seq_AN.Glut_1
Pip4p2	1.3118375199596145e-36	1.9741789006750148	0.052	0.015	3.290613235066697e-32	Seq_AN.Glut_1
Tmem255a	1.3536693923760239e-36	0.794113	0.414	0.303	3.395544303836018e-32	Seq_AN.Glut_1
Nr4a1	1.7138203958538664e-36	2.277254415481864	0.066	0.021	4.2989470809598385e-32	Seq_AN.Glut_1
Ppp4r1l-ps	2.1007236468299576e-36	1.9231037032978358	0.053	0.015	5.269455195708266e-32	Seq_AN.Glut_1
Gm43318	2.151987146844163e-36	2.4170260237494725	0.038	0.009	5.398044559143898e-32	Seq_AN.Glut_1
Tmeff1	2.536531742672251e-36	1.26566	0.231	0.138	6.362636223319074e-32	Seq_AN.Glut_1
Unc5c	2.6932116333351513e-36	0.5793433468195586	0.61	0.511	6.755652061057893e-32	Seq_AN.Glut_1
Gm49797	3.038530764119003e-36	1.837549553190431	0.062	0.019	7.621850568716107e-32	Seq_AN.Glut_1
Maco1	3.197249269762139e-36	1.6187917695703762	0.068	0.022	8.019980068271348e-32	Seq_AN.Glut_1
Dhx40	3.409046906481824e-36	1.1623240417044258	0.259	0.163	8.551253260219007e-32	Seq_AN.Glut_1
Dgkg	4.616796896190182e-36	1.2152178142215728	0.341	0.243	1.1580773334403453e-31	Seq_AN.Glut_1
Vstm2b	5.4590259202069276e-36	1.5579045843662125	0.151	0.075	1.3693420618247057e-31	Seq_AN.Glut_1
Igf1r	6.44729248323301e-36	0.9384941675919135	0.372	0.266	1.6172388464941683e-31	Seq_AN.Glut_1
Mcu	7.079206058193065e-36	1.1360183428727708	0.264	0.167	1.7757480476371485e-31	Seq_AN.Glut_1
Bdkrb2	7.332228664135668e-36	2.643461713840817	0.033	0.007	1.8392162381117908e-31	Seq_AN.Glut_1
Slc44a5	9.672922213337633e-36	1.1463606271589977	0.228	0.133	2.426355807993612e-31	Seq_AN.Glut_1
Satb2	3.482112724904527e-35	1.7467093345989142	0.071	0.025	8.734531559150516e-31	Seq_AN.Glut_1
Ptprn2	3.4865279836621516e-35	0.5586499808881502	0.672	0.631	8.74560679421814e-31	Seq_AN.Glut_1
4930484I04Rik	4.2576599975583734e-35	2.646318940762493	0.033	0.007	1.0679914337875424e-30	Seq_AN.Glut_1
B4galt1	6.073726363444487e-35	1.6553799301368584	0.085	0.032	1.5235335210064153e-30	Seq_AN.Glut_1
Myb	6.095619908293815e-35	2.2528406498037765	0.042	0.01	1.5290252977964206e-30	Seq_AN.Glut_1
Gm27803	7.195495424172126e-35	2.0115835736063903	0.051	0.014	1.804918072199336e-30	Seq_AN.Glut_1
Hist1h2bc	7.520537837879588e-35	2.5986883357386885	0.035	0.008	1.8864517112537158e-30	Seq_AN.Glut_1
A630081D01Rik	1.0307465713760422e-34	4.245641863499154	0.011	0.001	2.585524699639664e-30	Seq_AN.Glut_1
Negr1	1.6936578524722724e-34	0.3936942329754096	0.779	0.725	4.248371357141448e-30	Seq_AN.Glut_1
Rbis	1.8663518586923681e-34	1.8405420112581496	0.055	0.016	4.681557002343936e-30	Seq_AN.Glut_1
B230216N24Rik	2.983096117909012e-34	1.1578968626705608	0.2	0.112	7.482798302162965e-30	Seq_AN.Glut_1
Bmpr1a	3.923568949924906e-34	0.9522267929575743	0.288	0.187	9.841880353991633e-30	Seq_AN.Glut_1
Gm48582	6.926160999081045e-34	2.622351560162426	0.027	0.005	1.7373582250094894e-29	Seq_AN.Glut_1
Gm37731	7.942208203979653e-34	3.3284625238079286	0.016	0.002	1.992223505886256e-29	Seq_AN.Glut_1
Kalrn	1.058476011669321e-33	0.6229469436054917	0.527	0.431	2.655081227671325e-29	Seq_AN.Glut_1
Ahnak2	1.1441583970625454e-33	3.210243225855319	0.033	0.007	2.870006923191689e-29	Seq_AN.Glut_1
Xkr6	1.2466437847721827e-33	0.7462620255344657	0.354	0.243	3.127081269722543e-29	Seq_AN.Glut_1
H1f4	1.7331163648300958e-33	3.993639710388977	0.013	0.001	4.3473490895398125e-29	Seq_AN.Glut_1
5033421B08Rik	2.1016219581425636e-33	4.204197622276685	0.012	0.001	5.271708519804807e-29	Seq_AN.Glut_1
Arhgap10	2.152951027469382e-33	1.6595835629350693	0.078	0.029	5.400462357304197e-29	Seq_AN.Glut_1
Irs4	2.3235684353349362e-33	1.4219298718728044	0.15	0.077	5.828439063194154e-29	Seq_AN.Glut_1
Slc22a23	3.189012485393095e-33	1.300898104584302	0.238	0.149	7.999318918360038e-29	Seq_AN.Glut_1
Fbln1	3.323712302039529e-33	2.0398731114590913	0.088	0.036	8.337199938435955e-29	Seq_AN.Glut_1
Gm45881	3.415530458897514e-33	1.4734757855386154	0.176	0.098	8.567516603098524e-29	Seq_AN.Glut_1
Macrod2	3.562629782024954e-33	0.5052500171982173	0.698	0.634	8.936500545231395e-29	Seq_AN.Glut_1
1700087M22Rik	3.9571618827008666e-33	2.951546445671731	0.022	0.003	9.926144866566853e-29	Seq_AN.Glut_1
Chd7	4.860502649679136e-33	1.2478248979526905	0.12	0.055	1.2192084846455145e-28	Seq_AN.Glut_1
Gm10578	5.0706489620566614e-33	3.1863068351462243	0.02	0.003	1.271921585642293e-28	Seq_AN.Glut_1
Lcorl	5.185720667957679e-33	0.5212935382334728	0.479	0.361	1.3007861723505042e-28	Seq_AN.Glut_1
Malat1	6.05429344282551e-33	0.38272827443842683	0.997	0.996	1.518658967198351e-28	Seq_AN.Glut_1
Astn1	8.86053212049993e-33	0.6309367944353239	0.531	0.442	2.2225758771062023e-28	Seq_AN.Glut_1
Rasa4	9.63589316981731e-33	1.1094166639145047	0.154	0.078	2.417067442716974e-28	Seq_AN.Glut_1
4933412E12Rik	1.144795947551548e-32	4.010845623981265	0.011	0.001	2.871606154838303e-28	Seq_AN.Glut_1
Elp1	1.2229131753663866e-32	1.963826342119956	0.048	0.014	3.067555409089044e-28	Seq_AN.Glut_1
Arfgef3	1.376287002741908e-32	0.6316762174538728	0.59	0.512	3.4522783176778024e-28	Seq_AN.Glut_1
Ubr5	2.3851112305217942e-32	0.8480697297995353	0.43	0.342	5.982813010640868e-28	Seq_AN.Glut_1
Flacc1	3.5582636536148494e-32	4.464010865271652	0.01	0.001	8.925548548727489e-28	Seq_AN.Glut_1
Spindoc	3.680260274863607e-32	2.1709827734941003	0.043	0.011	9.231564873467872e-28	Seq_AN.Glut_1
Gm17057	3.83256654707902e-32	3.254200175124346	0.02	0.003	9.613609926693014e-28	Seq_AN.Glut_1
Gm37229	3.9292918777300776e-32	1.8011230131941995	0.052	0.016	9.856235746098126e-28	Seq_AN.Glut_1
Gm26672	4.556406537748387e-32	1.2513808020887203	0.175	0.096	1.1429290159288055e-27	Seq_AN.Glut_1
Gm50013	9.00763797167637e-32	2.1272118961234607	0.041	0.011	2.2594759088153006e-27	Seq_AN.Glut_1
Gabra2	1.0465933468962243e-31	0.6622997860122934	0.63	0.591	2.625274751354489e-27	Seq_AN.Glut_1
Rasgrf2	1.0947668226288797e-31	0.6836550229441348	0.435	0.336	2.746113097882282e-27	Seq_AN.Glut_1
Gm44797	1.741126280755064e-31	2.4475922231913905	0.032	0.007	4.367441162646003e-27	Seq_AN.Glut_1
Slit2	2.592623233912399e-31	0.779372	0.379	0.272	6.503336119945861e-27	Seq_AN.Glut_1
Jmjd1c	3.39173497814826e-31	0.6224110559271929	0.51	0.418	8.507828019187095e-27	Seq_AN.Glut_1
Gas5	3.8514369102858445e-31	0.44332484571811737	0.746	0.667	9.660944345761013e-27	Seq_AN.Glut_1
Gm37459	6.703145777650635e-31	1.3992980399164001	0.123	0.059	1.6814170868658852e-26	Seq_AN.Glut_1
Dact1	6.760401345257605e-31	2.1805783417992397	0.046	0.013	1.6957790734444177e-26	Seq_AN.Glut_1
H2-K1	6.807404602333467e-31	1.680608598224096	0.057	0.018	1.707569370449327e-26	Seq_AN.Glut_1
Macroh2a1	8.049841614488571e-31	1.9986212490280288	0.044	0.012	2.0192222705783132e-26	Seq_AN.Glut_1
Gm44593	8.97198307108846e-31	1.4258155473956264	0.089	0.037	2.2505322335518295e-26	Seq_AN.Glut_1
Magi3	1.0093199542729799e-30	0.7554970985725753	0.449	0.355	2.5317781732983427e-26	Seq_AN.Glut_1
Dip2c	1.1294883889633179e-30	0.7954651970466493	0.47	0.391	2.8332086748755866e-26	Seq_AN.Glut_1
Vgll3	1.2858752063079526e-30	1.9388374579495582	0.05	0.015	3.225489367502868e-26	Seq_AN.Glut_1
Shisa6	1.3691849756489474e-30	1.1720488556558841	0.197	0.115	3.43446359291782e-26	Seq_AN.Glut_1
Prom1	2.6142962443421003e-30	4.838428800266005	0.011	0.001	6.557700699307724e-26	Seq_AN.Glut_1
Cavin4	2.883992330660927e-30	2.2245111252152707	0.045	0.013	7.234206362229869e-26	Seq_AN.Glut_1
Gcn1	3.326451190700592e-30	1.797800599903597	0.05	0.015	8.344070166753365e-26	Seq_AN.Glut_1
Rtn4r	3.534078081649284e-30	2.225644783174851	0.067	0.025	8.864881460009063e-26	Seq_AN.Glut_1
Uty	3.6835465934367164e-30	1.0045196902703584	0.168	0.091	9.23980827497666e-26	Seq_AN.Glut_1
Fndc3a	4.3584404767543634e-30	0.5882772743125049	0.555	0.48	1.0932712091890645e-25	Seq_AN.Glut_1
Lyst	5.944077606580177e-30	0.9519744137619917	0.303	0.209	1.4910124268345716e-25	Seq_AN.Glut_1
Acss1	7.568598611703902e-30	2.413373249437221	0.029	0.006	1.898507275759807e-25	Seq_AN.Glut_1
C530043K16Rik	9.413764346429133e-30	3.085886035197629	0.019	0.003	2.3613486486582837e-25	Seq_AN.Glut_1
Lrrc4	9.975440957504672e-30	0.9660353948011706	0.288	0.196	2.5022396097804718e-25	Seq_AN.Glut_1
Gm10033	1.0050057623273611e-29	1.8458224839977593	0.049	0.015	2.5209564542219526e-25	Seq_AN.Glut_1
Tank	1.034530432334417e-29	1.0954678499773944	0.203	0.121	2.5950161364676517e-25	Seq_AN.Glut_1
Nyap2	1.1509202321437169e-29	0.7748824993813548	0.394	0.297	2.8869683103092995e-25	Seq_AN.Glut_1
Pitpnm2	1.4688901181171974e-29	1.1186966158585718	0.203	0.122	3.684563972285178e-25	Seq_AN.Glut_1
Cdkl4	1.4693195071597323e-29	1.5521153894351989	0.106	0.049	3.6856410517594723e-25	Seq_AN.Glut_1
Zfp536	1.9174470347139087e-29	0.8675289762936502	0.189	0.108	4.8097241418763685e-25	Seq_AN.Glut_1
Rnf169	2.87650441377903e-29	1.1546125490143273	0.31	0.223	7.215423671523319e-25	Seq_AN.Glut_1
Gm48855	3.4672472897795347e-29	2.3886694366655257	0.035	0.009	8.697243101682986e-25	Seq_AN.Glut_1
Dipk1a	3.586037962165991e-29	2.0628720662374778	0.046	0.014	8.995217624297171e-25	Seq_AN.Glut_1
Dnah5	3.789421284990518e-29	1.550467105294824	0.081	0.033	9.505384351270216e-25	Seq_AN.Glut_1
Stimate	4.342567159650637e-29	2.0820090320255855	0.04	0.011	1.0892895463267658e-24	Seq_AN.Glut_1
Gm16267	4.8660195809892663e-29	2.3221688330180816	0.031	0.007	1.2205923516953476e-24	Seq_AN.Glut_1
Odf2	6.459832544902993e-29	0.6874112355774429	0.539	0.463	1.6203843955634668e-24	Seq_AN.Glut_1
Pip4p1	7.107261675891063e-29	1.9497636363400686	0.045	0.013	1.782785518780514e-24	Seq_AN.Glut_1
Eml6	7.161968717071811e-29	0.5875254608123615	0.557	0.467	1.796508232990293e-24	Seq_AN.Glut_1
Entr1	8.08446237445315e-29	1.7867990248898535	0.05	0.016	2.0279065420078284e-24	Seq_AN.Glut_1
Ebf1	8.089741869591446e-29	0.3188106275636038	0.115	0.053	2.0292308505683182e-24	Seq_AN.Glut_1
Slc38a2	8.383924465072544e-29	0.9129030351111742	0.331	0.239	2.103023612818797e-24	Seq_AN.Glut_1
Ccdc141	9.630510414388408e-29	1.9835708564726477	0.063	0.023	2.415717232345188e-24	Seq_AN.Glut_1
Eipr1	1.5769427003768277e-28	2.1722218758895298	0.04	0.011	3.9556030696252344e-24	Seq_AN.Glut_1
Gm11346	1.9536450610251744e-28	2.798309993833483	0.016	0.002	4.9005232710755474e-24	Seq_AN.Glut_1
Rfx3	2.0654953150367563e-28	0.8238958490556046	0.358	0.26	5.1810884482382e-24	Seq_AN.Glut_1
March8	2.331650248371039e-28	0.8612436326171158	0.232	0.145	5.848711483013914e-24	Seq_AN.Glut_1
Spint2	2.79867712083758e-28	1.4226127536515676	0.288	0.212	7.020201689908985e-24	Seq_AN.Glut_1
Daam2	3.1030108956028336e-28	2.645928383268904	0.022	0.004	7.783592530530147e-24	Seq_AN.Glut_1
Gm9993	3.610982326501305e-28	2.0566274646115184	0.037	0.01	9.057788067795874e-24	Seq_AN.Glut_1
Gm12120	3.7259298390778266e-28	1.7787033755571255	0.061	0.022	9.34612240834282e-24	Seq_AN.Glut_1
Mid1	5.094210043039381e-28	1.056364051560311	0.165	0.091	1.2778316471959984e-23	Seq_AN.Glut_1
Cfap54	5.925777677180357e-28	0.8395682370610474	0.228	0.141	1.486422072543921e-23	Seq_AN.Glut_1
Fosl2	6.7475291590720486e-28	2.3228830583174136	0.039	0.011	1.6925502142616327e-23	Seq_AN.Glut_1
Zfp516	6.848686736426476e-28	1.376467110354044	0.094	0.042	1.7179245809652172e-23	Seq_AN.Glut_1
Oip5os1	7.616735746995383e-28	2.151451898840441	0.04	0.011	1.910581994776322e-23	Seq_AN.Glut_1
AW551984	8.858720135150397e-28	0.8727609266433747	0.326	0.236	2.2221213587011255e-23	Seq_AN.Glut_1
Zim1	1.0654270501219738e-27	0.965242	0.216	0.132	2.672517212525959e-23	Seq_AN.Glut_1
Gm44799	1.2109797056907439e-27	2.339136672759502	0.029	0.007	3.037621493754662e-23	Seq_AN.Glut_1
Plcl1	1.2594566898456913e-27	1.2663970781081624	0.258	0.175	3.159221160808932e-23	Seq_AN.Glut_1
Klhl29	1.4613626454117476e-27	0.6188474341787598	0.39	0.285	3.6656820597508276e-23	Seq_AN.Glut_1
Cdh9	2.0513610239908574e-27	1.0078325869001095	0.204	0.124	5.1456339925786667e-23	Seq_AN.Glut_1
Mbp	2.0663747133430057e-27	1.4493634174262757	0.064	0.024	5.183294330949596e-23	Seq_AN.Glut_1
Eif2ak3	2.277737601187811e-27	1.4506228291374113	0.144	0.078	5.713476998819505e-23	Seq_AN.Glut_1
LTO1	2.3106642471798173e-27	2.557455466369696	0.026	0.006	5.796070197625854e-23	Seq_AN.Glut_1
Nuak1	2.5657378647139395e-27	1.4699182826296124	0.131	0.068	6.435896859848445e-23	Seq_AN.Glut_1
Parp12	2.5820428484810534e-27	1.7164608747787682	0.058	0.021	6.476796281129874e-23	Seq_AN.Glut_1
Hrh1	2.637868867700551e-27	1.7673061417894957	0.104	0.05	6.616830267740062e-23	Seq_AN.Glut_1
Stac2	2.689245374016373e-27	1.5207783057094892	0.08	0.034	6.74570309618267e-23	Seq_AN.Glut_1
Gm28307	2.9384454786441753e-27	1.6788048409720386	0.058	0.021	7.37079663863105e-23	Seq_AN.Glut_1
Gm10048	3.34885365488554e-27	1.9061345272390877	0.032	0.008	8.400264507914888e-23	Seq_AN.Glut_1
Tle5	3.7119609186149836e-27	2.0862124749236446	0.039	0.011	9.311082768253825e-23	Seq_AN.Glut_1
Ndufb1-ps	3.977928120319041e-27	2.0973627920209355	0.039	0.011	9.978234897008282e-23	Seq_AN.Glut_1
Atp5pb	4.4563729643942895e-27	2.029910407264892	0.046	0.015	1.1178365943886637e-22	Seq_AN.Glut_1
Gm49085	4.569366192249946e-27	2.405502937861195	0.025	0.005	1.1461798156639766e-22	Seq_AN.Glut_1
Grin3a	4.679293281524123e-27	0.7866806122127356	0.439	0.352	1.173753926737511e-22	Seq_AN.Glut_1
Gm29530	6.062990306591876e-27	2.913100809516447	0.02	0.003	1.5208404885055063e-22	Seq_AN.Glut_1
Gm38365	6.32609955930769e-27	2.8138748583882647	0.02	0.003	1.586838813456741e-22	Seq_AN.Glut_1
Rpl17-ps10	7.458438464920646e-27	2.7371471358325214	0.019	0.003	1.8708747045406948e-22	Seq_AN.Glut_1
Gm3294	8.157513940541649e-27	1.407483412516069	0.074	0.03	2.0462307968454673e-22	Seq_AN.Glut_1
Gm13622	8.438983515050976e-27	2.266088364721023	0.029	0.007	2.1168346249153868e-22	Seq_AN.Glut_1
Stk32b	9.237856576690731e-27	1.3866328018151015	0.071	0.028	2.317223943697103e-22	Seq_AN.Glut_1
Tent5d	9.995166200060841e-27	2.439455843300169	0.026	0.005	2.507187489623261e-22	Seq_AN.Glut_1
B230303A05Rik	1.0620479692786979e-26	1.4348756243904108	0.078	0.032	2.664041126138686e-22	Seq_AN.Glut_1
Gm38162	1.0804209510108478e-26	2.8267416867738424	0.022	0.004	2.7101279135156104e-22	Seq_AN.Glut_1
Hyi	1.1279325690135775e-26	1.6341582527104759	0.057	0.02	2.8293060561136576e-22	Seq_AN.Glut_1
Ctsz	1.1713633721014803e-26	1.954914296163766	0.075	0.031	2.938247882579353e-22	Seq_AN.Glut_1
Cd274	1.2068171692570881e-26	2.2718841852398763	0.04	0.011	3.02718018736448e-22	Seq_AN.Glut_1
Ncoa2	1.2132234775098323e-26	0.6963670978443562	0.394	0.3	3.0432497709856633e-22	Seq_AN.Glut_1
Dancr	1.555429815959811e-26	2.515313912508866	0.032	0.008	3.90164015035359e-22	Seq_AN.Glut_1
Pced1b	1.61845434903198e-26	0.7811610449670359	0.3	0.208	4.059730889111819e-22	Seq_AN.Glut_1
Itgb6	1.920007557038924e-26	2.8866812155393147	0.016	0.002	4.8161469560764375e-22	Seq_AN.Glut_1
Gm42585	1.9589301662244274e-26	2.075320679436503	0.034	0.009	4.913780428957354e-22	Seq_AN.Glut_1
Pou6f1	1.964600278935838e-26	0.853477	0.255	0.167	4.928003339682656e-22	Seq_AN.Glut_1
Nrxn3	2.075905661405801e-26	0.3074201494788138	0.825	0.781	5.207201761070311e-22	Seq_AN.Glut_1
Dnah1	2.397381927964549e-26	1.1537519803637624	0.164	0.094	6.013592828106275e-22	Seq_AN.Glut_1
Scg2	2.4981019743477905e-26	1.1256667883117366	0.617	0.577	6.266238992453997e-22	Seq_AN.Glut_1
Gzmk	2.5321377516166495e-26	1.1004464724663612	0.142	0.077	6.351614336155203e-22	Seq_AN.Glut_1
Pde4d	3.94116286285986e-26	0.7925345574389957	0.68	0.664	9.886012925197672e-22	Seq_AN.Glut_1
Zcchc9	5.355973851155043e-26	0.9585537584303218	0.217	0.138	1.343492480823731e-21	Seq_AN.Glut_1
Sik3	5.616163976787759e-26	0.7278112720466469	0.457	0.383	1.4087585719374416e-21	Seq_AN.Glut_1
Gm37238	6.75163390988106e-26	2.6925417207301674	0.026	0.006	1.6935798499545652e-21	Seq_AN.Glut_1
Gm48512	7.742298212242134e-26	1.7524042083794766	0.049	0.016	1.942078083558817e-21	Seq_AN.Glut_1
Gm38394	8.044822215210908e-26	1.5248546454789573	0.059	0.021	2.017963204463504e-21	Seq_AN.Glut_1
Lrrfip2	1.1369745161491363e-25	0.7290817326967979	0.381	0.296	2.8519868763084934e-21	Seq_AN.Glut_1
Gm47423	1.2422769838302514e-25	2.4022858650202186	0.032	0.008	3.1161275862398027e-21	Seq_AN.Glut_1
Gm12743	1.27047916225028e-25	1.1456571356759069	0.157	0.088	3.1868699305886025e-21	Seq_AN.Glut_1
Icam2	1.3312954162421706e-25	2.970578714186085	0.021	0.004	3.3394214221018608e-21	Seq_AN.Glut_1
Tafa1	1.61608628375081e-25	0.5402060296863267	0.047	0.015	4.053790834160532e-21	Seq_AN.Glut_1
Gm26676	1.6407681476585488e-25	3.6103398436732794	0.015	0.002	4.115702821586704e-21	Seq_AN.Glut_1
Vegfa	1.7769141205576217e-25	1.50104	0.151	0.086	4.4572113800067385e-21	Seq_AN.Glut_1
Orc1	2.760524255269196e-25	1.3277864130712775	0.108	0.053	6.924499041917251e-21	Seq_AN.Glut_1
Gm43847	3.0970910913183967e-25	2.1976988345387904	0.032	0.008	7.768743293463066e-21	Seq_AN.Glut_1
Sorcs3	3.779186241441171e-25	0.5898559274354834	0.404	0.308	9.479710768031033e-21	Seq_AN.Glut_1
Gm19445	4.0118083080071246e-25	3.5706733351412394	0.013	0.002	1.0063219959805071e-20	Seq_AN.Glut_1
Ubxn4	5.66176582799653e-25	0.5361260772329224	0.639	0.593	1.4201973402946496e-20	Seq_AN.Glut_1
5330434G04Rik	6.058946154709002e-25	0.39264159924650777	0.65	0.579	1.519826053447206e-20	Seq_AN.Glut_1
Atxn7l1	6.1290313363960265e-25	0.826239	0.34	0.255	1.5374062204215793e-20	Seq_AN.Glut_1
Eif4e3	6.1632187563765585e-25	1.1871665329808447	0.145	0.081	1.545981792849496e-20	Seq_AN.Glut_1
Adcy5	7.25250252730724e-25	1.0983850550117624	0.202	0.127	1.819217733949748e-20	Seq_AN.Glut_1
Gm43316	7.512911245418588e-25	2.181199247535398	0.028	0.007	1.8845386568007988e-20	Seq_AN.Glut_1
Pik3r1	1.1153571096710101e-24	1.008009348348635	0.254	0.176	2.797761773898762e-20	Seq_AN.Glut_1
Gm48091	1.1809529394513622e-24	1.9237815995780507	0.039	0.011	2.962302353319797e-20	Seq_AN.Glut_1
Zfp783	1.1899380353904057e-24	2.0260547669351006	0.035	0.01	2.984840567973294e-20	Seq_AN.Glut_1
Osbpl10	1.3403181732101053e-24	1.0892966727672357	0.18	0.109	3.362054105680228e-20	Seq_AN.Glut_1
Gm50232	1.3951203844480084e-24	2.4833510559352687	0.026	0.006	3.499519972349384e-20	Seq_AN.Glut_1
Trank1	1.4070686952461706e-24	0.6930868393724727	0.419	0.338	3.5294911151554944e-20	Seq_AN.Glut_1
Acap2	1.4716511157514972e-24	0.8301639128487723	0.318	0.235	3.691489658751056e-20	Seq_AN.Glut_1
Phf8	1.8681509190694235e-24	1.0092234714697224	0.245	0.167	4.686069765393742e-20	Seq_AN.Glut_1
Ercc5	2.0046399547736573e-24	1.1579308885558939	0.225	0.148	5.028438862554242e-20	Seq_AN.Glut_1
Trim2	2.3728348058588596e-24	0.42933739669970183	0.696	0.655	5.952018827016363e-20	Seq_AN.Glut_1
Fbxl17	2.4494182061800818e-24	0.6067592291040985	0.419	0.329	6.144120628382118e-20	Seq_AN.Glut_1
Casq2	3.266958511504927e-24	3.2868213401249546	0.014	0.002	8.194838730258958e-20	Seq_AN.Glut_1
Olfm3	3.7061426722710454e-24	0.6052090320208878	0.457	0.367	9.29648827912469e-20	Seq_AN.Glut_1
Gm48914	3.922945569181478e-24	2.4746898947954445	0.021	0.004	9.84031666573482e-20	Seq_AN.Glut_1
Slc1a3	4.06035673774879e-24	2.0483692710298405	0.027	0.007	1.0184998840969065e-19	Seq_AN.Glut_1
Stk38l	5.083190906794038e-24	1.2911328918380056	0.135	0.075	1.2750676070602166e-19	Seq_AN.Glut_1
Lrrtm3	5.4072108177640825e-24	0.6877724712807729	0.48	0.403	1.3563447615279424e-19	Seq_AN.Glut_1
Tmem219	5.496183957221613e-24	1.0711170255024896	0.219	0.144	1.3786627838294693e-19	Seq_AN.Glut_1
Gm9945	5.5678198094114436e-24	1.7413762254503808	0.063	0.025	1.3966319209927664e-19	Seq_AN.Glut_1
Gm48003	5.594739778908456e-24	2.8928717883419273	0.022	0.004	1.403384526141397e-19	Seq_AN.Glut_1
Gm11713	6.031337166517178e-24	1.7402001400609004	0.063	0.025	1.5129006148491689e-19	Seq_AN.Glut_1
Clmn	6.056944886194512e-24	0.8990333412069423	0.289	0.207	1.5193240552530314e-19	Seq_AN.Glut_1
Gm48623	6.0669711948332525e-24	2.948932432466412	0.016	0.003	1.521839054511973e-19	Seq_AN.Glut_1
Arhgap31	6.527245500765859e-24	2.587740694846327	0.035	0.01	1.6372942614121082e-19	Seq_AN.Glut_1
Gm42919	1.023708010651512e-23	1.9165965225242951	0.031	0.008	2.567869173918253e-19	Seq_AN.Glut_1
Gm35438	1.1874689811742757e-23	2.9855739769215903	0.016	0.003	2.978647192377553e-19	Seq_AN.Glut_1
Gm49329	1.3296090523524733e-23	1.4396114548663972	0.054	0.02	3.335191346920944e-19	Seq_AN.Glut_1
Racgap1	1.4008008119476704e-23	1.5965981835614356	0.093	0.045	3.5137687566895365e-19	Seq_AN.Glut_1
Gpr158	1.8435485384251273e-23	0.5487044874389733	0.571	0.518	4.62435715378559e-19	Seq_AN.Glut_1
Gm27153	1.9808810800491428e-23	1.5930090548042757	0.063	0.025	4.9688421011952695e-19	Seq_AN.Glut_1
Ostc	2.061041059671397e-23	0.9186941935989561	0.334	0.257	5.169915394079732e-19	Seq_AN.Glut_1
Tmtc4	2.1655890263881252e-23	1.1041065070054312	0.202	0.13	5.432163513791974e-19	Seq_AN.Glut_1
4933433G19Rik	2.2205648985149212e-23	2.5817835583245783	0.02	0.004	5.570064991434828e-19	Seq_AN.Glut_1
P2rx7	2.297589912383276e-23	2.5739020791627416	0.02	0.004	5.76327453622221e-19	Seq_AN.Glut_1
C130089K02Rik	2.4333589384105304e-23	2.7402460712103043	0.015	0.002	6.103837561108974e-19	Seq_AN.Glut_1
B830012L14Rik	2.779231500863213e-23	1.0470307715105434	0.131	0.071	6.971424296765284e-19	Seq_AN.Glut_1
Gm18959	2.982640674843052e-23	3.1953083157010385	0.012	0.002	7.481655868776312e-19	Seq_AN.Glut_1
Tmem176a	3.265953577760332e-23	1.3736568574931871	0.121	0.065	8.1923179544540165e-19	Seq_AN.Glut_1
Tmed3	3.4661262067706284e-23	1.5563687145321023	0.213	0.148	8.694430977063444e-19	Seq_AN.Glut_1
Gm42771	3.8818557477238986e-23	2.5345701524521793	0.024	0.005	9.737246957590627e-19	Seq_AN.Glut_1
Shfl	4.045138321449094e-23	1.7768500193074153	0.044	0.015	1.0146824965522909e-18	Seq_AN.Glut_1
Gm44560	4.254036516632057e-23	1.110565556450569	0.068	0.028	1.0670825198319853e-18	Seq_AN.Glut_1
P2ry14	4.5046401523617783e-23	0.5784186606547992	0.247	0.16	1.1299439358184285e-18	Seq_AN.Glut_1
Akap7	4.577900593252503e-23	0.8404956274966583	0.293	0.212	1.1483205848114577e-18	Seq_AN.Glut_1
Dennd1a	4.5792385424994074e-23	0.5322275843533686	0.488	0.403	1.1486561960005513e-18	Seq_AN.Glut_1
Zhx2	4.5988592822378236e-23	1.2398195870617563	0.102	0.051	1.1535778623565357e-18	Seq_AN.Glut_1
Gpr165	6.622625123970914e-23	1.5743697514152155	0.093	0.045	1.661219286096864e-18	Seq_AN.Glut_1
Gm44863	7.338653554673095e-23	2.338977905926452	0.025	0.006	1.8408278576541993e-18	Seq_AN.Glut_1
A230077H06Rik	7.51799366313085e-23	1.4588422594647334	0.063	0.025	1.8858135304597422e-18	Seq_AN.Glut_1
Osbpl3	8.047438153145157e-23	1.2717743681532396	0.105	0.054	2.018619386334931e-18	Seq_AN.Glut_1
Tmem223	9.626023991209227e-23	2.045598958688985	0.034	0.01	2.4145918579549227e-18	Seq_AN.Glut_1
Thrsp	1.0029075702492729e-22	1.745743333006145	0.05	0.018	2.5156933492132764e-18	Seq_AN.Glut_1
Nf2	1.1019682159417616e-22	1.1278779719310226	0.197	0.128	2.7641770728683148e-18	Seq_AN.Glut_1
Vps13b	1.1215784362411617e-22	0.5353570978241934	0.468	0.381	2.81336734946733e-18	Seq_AN.Glut_1
Ppm1d	1.239053403534091e-22	1.188303058526042	0.127	0.069	3.108041557424914e-18	Seq_AN.Glut_1
Gm19522	1.3702628699007832e-22	2.092858705370667	0.038	0.012	3.4371673828591246e-18	Seq_AN.Glut_1
Wnk1	1.5028911359324085e-22	0.5940633237150554	0.44	0.357	3.769852125372854e-18	Seq_AN.Glut_1
Myo7a	1.7816298635775402e-22	1.651080299271929	0.049	0.018	4.469040349797902e-18	Seq_AN.Glut_1
Slc24a2	1.9498426840817255e-22	0.5542662846498989	0.516	0.439	4.8909853887506e-18	Seq_AN.Glut_1
Cmip	2.100122497785806e-22	0.47512789453725257	0.592	0.53	5.267947273445916e-18	Seq_AN.Glut_1
5330437M03Rik	2.1162023534205313e-22	3.1974733568990708	0.013	0.002	5.308281983320061e-18	Seq_AN.Glut_1
4930587E11Rik	2.152931113711872e-22	1.0130617739931205	0.131	0.072	5.4004124056348595e-18	Seq_AN.Glut_1
Zcwpw2	2.2120024500053397e-22	2.518680859459071	0.024	0.006	5.548586945593394e-18	Seq_AN.Glut_1
Slc39a11	2.3468337256859365e-22	1.2112817618669416	0.152	0.09	5.886797717510603e-18	Seq_AN.Glut_1
Gm47271	2.4828877472300384e-22	1.7565731236017568	0.039	0.012	6.2280756251518285e-18	Seq_AN.Glut_1
Gm43896	2.574854431644636e-22	2.480516683475381	0.021	0.004	6.458764856337405e-18	Seq_AN.Glut_1
Lrrc7	2.7428157154358993e-22	0.3681239999714778	0.697	0.642	6.88007894059941e-18	Seq_AN.Glut_1
Rps6ka5	3.252651711190224e-22	0.8632646290442453	0.233	0.157	8.158951552349558e-18	Seq_AN.Glut_1
Lncpint	3.3705983925903284e-22	0.7018674044457252	0.48	0.425	8.45480900797358e-18	Seq_AN.Glut_1
Bet1	3.674358368386911e-22	0.9806586503545458	0.212	0.14	9.216760531261727e-18	Seq_AN.Glut_1
Gm37941	4.964271493216765e-22	2.29794	0.024	0.006	1.2452378613584935e-17	Seq_AN.Glut_1
Sytl5	5.11656972113659e-22	1.4553166662934118	0.072	0.032	1.2834403488499022e-17	Seq_AN.Glut_1
Gphn	5.827660525130905e-22	0.40819263928758787	0.699	0.677	1.4618103661238363e-17	Seq_AN.Glut_1
Gm13268	5.899675017928508e-22	2.7154571963631557	0.017	0.003	1.479874481497187e-17	Seq_AN.Glut_1
Gm47664	6.097283946613224e-22	3.655712135903996	0.012	0.002	1.5294427051684612e-17	Seq_AN.Glut_1
Lrpap1	6.122120939420679e-22	1.180188655471995	0.416	0.372	1.5356728164442832e-17	Seq_AN.Glut_1
Sorbs2	6.453389596473881e-22	0.5020266178381176	0.544	0.476	1.6187682463795083e-17	Seq_AN.Glut_1
4930549G23Rik	6.505611249541824e-22	2.0492989823397343	0.032	0.009	1.631867525835071e-17	Seq_AN.Glut_1
Gm42853	7.056642844049024e-22	2.964421322494651	0.015	0.002	1.770088291001257e-17	Seq_AN.Glut_1
Rxylt1	7.368761782463144e-22	1.9500088351294185	0.037	0.012	1.8483802055130548e-17	Seq_AN.Glut_1
H4c14	7.802365619409289e-22	3.269875967258627	0.011	0.001	1.957145391972626e-17	Seq_AN.Glut_1
Gm49595	8.012590115837975e-22	1.95205	0.031	0.009	2.0098781046567977e-17	Seq_AN.Glut_1
H2az1	8.381115077550093e-22	2.272116479932185	0.028	0.007	2.1023189060526655e-17	Seq_AN.Glut_1
Zcchc11	1.1219347522213304e-21	0.6939425172241376	0.516	0.477	2.8142611324719855e-17	Seq_AN.Glut_1
Igf2r	1.289636938873628e-21	1.1792206642253646	0.162	0.099	3.234925297470608e-17	Seq_AN.Glut_1
Rere	1.7939966953388542e-21	0.44948126549827316	0.605	0.545	4.5000613105879816e-17	Seq_AN.Glut_1
Notch4	1.9148662940499143e-21	2.9128158460842144	0.018	0.003	4.803250611994805e-17	Seq_AN.Glut_1
Otulinl	2.1047655282417435e-21	2.421470254906332	0.024	0.006	5.279593851041589e-17	Seq_AN.Glut_1
Gm13266	2.1161203509477142e-21	3.3613360688229026	0.011	0.001	5.308076288317247e-17	Seq_AN.Glut_1
Gm26604	2.2610640505696913e-21	2.567625561247955	0.026	0.007	5.671653064449014e-17	Seq_AN.Glut_1
Stard13	2.5133630926562225e-21	2.157458885022084	0.025	0.006	6.304519981618869e-17	Seq_AN.Glut_1
Apbb2	2.608500945840823e-21	0.7154251147413058	0.417	0.351	6.54316377254712e-17	Seq_AN.Glut_1
Ank3	2.9856510001940255e-21	0.30251174417698223	0.829	0.821	7.489206968886694e-17	Seq_AN.Glut_1
Gm37531	3.4466773055947925e-21	2.5840105966369054	0.018	0.004	8.645645353353977e-17	Seq_AN.Glut_1
4930589O11Rik	3.9641735987662946e-21	2.9997131171731226	0.013	0.002	9.943733055145373e-17	Seq_AN.Glut_1
Gm28501	4.0988254627580875e-21	1.8632529163964597	0.034	0.01	1.0281493790782387e-16	Seq_AN.Glut_1
Ilrun	4.1813116597227996e-21	2.0763745339353163	0.031	0.009	1.048840216724867e-16	Seq_AN.Glut_1
Grtp1	4.277775774597618e-21	1.61823	0.086	0.042	1.0730372753000665e-16	Seq_AN.Glut_1
St3gal1	4.415327608701153e-21	1.9587692683615776	0.033	0.01	1.1075407773665972e-16	Seq_AN.Glut_1
Tmtc1	4.6940240906004925e-21	0.8420218199723897	0.275	0.196	1.1774490028862275e-16	Seq_AN.Glut_1
Gm49356	4.737161392862837e-21	1.9466023783193283	0.034	0.011	1.188269563785714e-16	Seq_AN.Glut_1
Gm37258	7.048937701129129e-21	2.6513332384305546	0.016	0.003	1.7681555329512307e-16	Seq_AN.Glut_1
Acot11	7.720507614517179e-21	1.634273531081976	0.053	0.021	1.9366121300254892e-16	Seq_AN.Glut_1
Mtss2	8.3492984147326e-21	2.0587735018844677	0.03	0.009	2.0943380143515255e-16	Seq_AN.Glut_1
Psmb8	8.839867576417639e-21	2.7623111587867113	0.019	0.004	2.2173923828686005e-16	Seq_AN.Glut_1
Rbm3	8.909761405480927e-21	1.29046	0.124	0.07	2.234924550950836e-16	Seq_AN.Glut_1
Asl	8.957734711465623e-21	1.3552271185583011	0.151	0.091	2.246958175024037e-16	Seq_AN.Glut_1
Odr4	9.178674164001933e-21	2.0297242255728225	0.029	0.008	2.302378627298245e-16	Seq_AN.Glut_1
Gm43046	9.374624091820002e-21	2.5433128574746506	0.02	0.004	2.3515307071921294e-16	Seq_AN.Glut_1
Ess2	9.408945956163748e-21	3.188171293625473	0.012	0.002	2.3601400036441147e-16	Seq_AN.Glut_1
Tiparp	9.532651849842633e-21	1.5745610177070692	0.118	0.066	2.391170390014526e-16	Seq_AN.Glut_1
Mok	1.0312636966718548e-20	0.8300793208938286	0.191	0.121	2.5868218567316804e-16	Seq_AN.Glut_1
Pacrg	1.105397307640653e-20	0.884076	0.23	0.157	2.772778606485814e-16	Seq_AN.Glut_1
Mtln	1.1205120840140609e-20	2.32239	0.025	0.006	2.81069251154087e-16	Seq_AN.Glut_1
6430511E19Rik	1.2125264894504635e-20	2.432451734669251	0.021	0.005	3.0415014461375427e-16	Seq_AN.Glut_1
Gm26631	1.506168001206684e-20	2.422089601721484	0.017	0.003	3.778071814226846e-16	Seq_AN.Glut_1
Pdlim3	1.9253705016077096e-20	2.3098864965351917	0.021	0.005	4.829599366232779e-16	Seq_AN.Glut_1
Stat3	2.1006726971959102e-20	0.9540471393493914	0.205	0.137	5.269327393646221e-16	Seq_AN.Glut_1
Gm47167	2.1496147156529893e-20	1.705335660141519	0.034	0.011	5.392093552743959e-16	Seq_AN.Glut_1
Gm11418	2.1568674516155102e-20	0.7351050143384873	0.17	0.103	5.410286315632346e-16	Seq_AN.Glut_1
Dop1b	2.1896300033238817e-20	1.6247911165990172	0.044	0.016	5.492467900337625e-16	Seq_AN.Glut_1
Cpe	2.203335264119963e-20	0.5272099970893727	0.618	0.555	5.526846176518516e-16	Seq_AN.Glut_1
Mast3	2.40728270609875e-20	1.1205859613601077	0.165	0.102	6.038427939978105e-16	Seq_AN.Glut_1
AC163638.2	2.445487549505966e-20	2.464092029248194	0.018	0.004	6.134260969180765e-16	Seq_AN.Glut_1
Gm42484	2.805026769806993e-20	2.6716578701321456	0.016	0.003	7.036129149383861e-16	Seq_AN.Glut_1
Ppp2r3a	2.8084469606111645e-20	0.708059	0.38	0.301	7.044708355997045e-16	Seq_AN.Glut_1
Phf21a	3.2106813555778964e-20	0.5553918905548785	0.424	0.343	8.053673112331595e-16	Seq_AN.Glut_1
Tmem39a	3.4993329709972234e-20	1.091438548368781	0.106	0.056	8.777726824449435e-16	Seq_AN.Glut_1
Prkg2	3.7793055120442647e-20	0.9896173497933161	0.132	0.076	9.480009946411833e-16	Seq_AN.Glut_1
Gm43343	4.041607418739203e-20	3.2012913136647914	0.013	0.002	1.0137968049165417e-15	Seq_AN.Glut_1
Rad51ap2	4.1502700385038195e-20	1.4035763730148498	0.051	0.02	1.041053736458298e-15	Seq_AN.Glut_1
Hdac4	4.5336006873491033e-20	0.8762076410180655	0.203	0.135	1.1372083964146492e-15	Seq_AN.Glut_1
Cfap300	5.049114899014228e-20	2.1434852259082424	0.028	0.008	1.2665199812687289e-15	Seq_AN.Glut_1
Gm48889	6.145733278942463e-20	2.7297696480773386	0.015	0.003	1.5415957356899273e-15	Seq_AN.Glut_1
Gm40375	6.576971197883668e-20	2.5706	0.016	0.003	1.6497674552771393e-15	Seq_AN.Glut_1
Mdrl	7.123271016873097e-20	2.341134938541054	0.028	0.008	1.7868013018724477e-15	Seq_AN.Glut_1
Gm7072	1.0748899945577962e-19	2.3169554242510655	0.025	0.006	2.6962540623487758e-15	Seq_AN.Glut_1
Riok2	1.1516698413640045e-19	2.1268257826269976	0.029	0.009	2.8888486300774687e-15	Seq_AN.Glut_1
Gm5165	1.1648167104708235e-19	2.4861623840836637	0.016	0.003	2.9218262365450135e-15	Seq_AN.Glut_1
Cacna1a	1.4775823091980923e-19	0.4449841443208631	0.607	0.569	3.706367464392495e-15	Seq_AN.Glut_1
Insyn2b	1.5682492349705606e-19	2.0473783908429937	0.025	0.006	3.933796381000154e-15	Seq_AN.Glut_1
2810013P06Rik	1.9713809195552379e-19	2.0502966394761013	0.029	0.009	4.945011898612359e-15	Seq_AN.Glut_1
Hs3st2	2.020444190286464e-19	1.6544782015581285	0.058	0.024	5.068082206914566e-15	Seq_AN.Glut_1
Gm2011	2.0927238430131831e-19	1.817682566096908	0.033	0.01	5.2493884878142685e-15	Seq_AN.Glut_1
Gm42480	2.1024652830747107e-19	2.694723861457766	0.016	0.003	5.273823916064604e-15	Seq_AN.Glut_1
C030015E24Rik	2.1077231558123133e-19	1.957645354550177	0.027	0.007	5.287012764039607e-15	Seq_AN.Glut_1
Galnt10	2.170167351272171e-19	1.0511523104578753	0.111	0.06	5.443647783931113e-15	Seq_AN.Glut_1
Slc49a4	2.2354137861691996e-19	2.1061829201553737	0.026	0.007	5.60731194122682e-15	Seq_AN.Glut_1
Cyp4f13	2.56049334279836e-19	1.6904639548588705	0.046	0.017	6.422741501075406e-15	Seq_AN.Glut_1
Cntn6	2.729356570851354e-19	0.48461213810835413	0.434	0.349	6.846318022323536e-15	Seq_AN.Glut_1
Rgcc	2.863852705667782e-19	1.6022099188996375	0.027	0.008	7.183688126897064e-15	Seq_AN.Glut_1
Gm42768	3.4366004206895625e-19	2.6355006174019646	0.016	0.003	8.620368495257698e-15	Seq_AN.Glut_1
Homer2	5.102743812266229e-19	1.1596518582270499	0.161	0.103	1.2799722578688608e-14	Seq_AN.Glut_1
Ctnna3	5.228385928772326e-19	0.7249434818405256	0.424	0.354	1.3114883263732502e-14	Seq_AN.Glut_1
Gm36298	5.259102403137958e-19	2.291699105121462	0.022	0.005	1.3191932468031253e-14	Seq_AN.Glut_1
Runx1t1	5.341479776737636e-19	0.6297477426643939	0.347	0.267	1.3398567871968687e-14	Seq_AN.Glut_1
A630089N07Rik	5.4918493462835975e-19	2.383440692177079	0.026	0.007	1.3775754900217776e-14	Seq_AN.Glut_1
Gm49961	5.7680689291262365e-19	2.1705307783190646	0.023	0.006	1.446862410182025e-14	Seq_AN.Glut_1
5330431K02Rik	6.355508397566654e-19	1.7348199703404732	0.036	0.012	1.5942157264456196e-14	Seq_AN.Glut_1
Slc24a3	6.770812684082474e-19	0.6132445300150962	0.515	0.458	1.6983906536752478e-14	Seq_AN.Glut_1
Gm44800	6.968380796974107e-19	2.444644003081655	0.023	0.006	1.7479486391129852e-14	Seq_AN.Glut_1
N4bp2	7.598604571395076e-19	0.7248692892185135	0.288	0.212	1.906033970688741e-14	Seq_AN.Glut_1
Gm49628	8.192572022994294e-19	2.103515609525008	0.025	0.007	2.0550247662478886e-14	Seq_AN.Glut_1
Irf7	9.055246415047769e-19	2.7036074639645546	0.016	0.003	2.2714180107505822e-14	Seq_AN.Glut_1
Gm49683	1.0914074693248086e-18	2.610129508069366	0.015	0.003	2.73768649605435e-14	Seq_AN.Glut_1
Ascc3	1.1007747650981479e-18	0.6486275456299362	0.354	0.28	2.761183420772194e-14	Seq_AN.Glut_1
Cflar	1.2293599168783033e-18	1.6321488937753155	0.064	0.029	3.083726415497536e-14	Seq_AN.Glut_1
Gm44541	1.3174745156893875e-18	2.755307789412252	0.017	0.004	3.30475307515526e-14	Seq_AN.Glut_1
Lama2	1.469989120077484e-18	1.5812166091187412	0.046	0.018	3.687320708802361e-14	Seq_AN.Glut_1
Plcxd3	1.471851235596154e-18	0.9297618815348055	0.366	0.309	3.6919916393693926e-14	Seq_AN.Glut_1
Eva1c	1.487773620798189e-18	1.4990389029965332	0.055	0.023	3.7319313504101773e-14	Seq_AN.Glut_1
Phc2	1.524401407531762e-18	0.623009	0.343	0.264	3.823808490652672e-14	Seq_AN.Glut_1
Cacng2	1.5311823993235955e-18	0.7378226972826367	0.399	0.337	3.840817930463307e-14	Seq_AN.Glut_1
Sinhcaf	1.5393849130604064e-18	2.9066126199245703	0.011	0.002	3.861393115920724e-14	Seq_AN.Glut_1
Prrc2c	1.561496174189429e-18	0.3517128560398728	0.816	0.793	3.9168570033367634e-14	Seq_AN.Glut_1
Gm44829	1.564279205424314e-18	1.2134535451205566	0.058	0.025	3.923837958886349e-14	Seq_AN.Glut_1
Sorbs1	1.56969630985286e-18	0.5683162541787059	0.426	0.351	3.9374262236349136e-14	Seq_AN.Glut_1
Fars2	1.6115291757697427e-18	0.7321589557974264	0.287	0.216	4.042359784500823e-14	Seq_AN.Glut_1
Myo1b	1.6442363864111802e-18	1.020311709422968	0.137	0.082	4.1244025516738045e-14	Seq_AN.Glut_1
Dgkk	1.6461754143420178e-18	1.0687978305342765	0.147	0.09	4.1292664093355175e-14	Seq_AN.Glut_1
Arhgap20	1.7254230644449012e-18	0.6842835233535345	0.363	0.294	4.32805121485359e-14	Seq_AN.Glut_1
Gldc	1.7829573617550164e-18	1.6162587832049233	0.044	0.016	4.4723702462262835e-14	Seq_AN.Glut_1
Trmt9b	1.811969647544643e-18	2.517767775812267	0.015	0.003	4.5451446639009825e-14	Seq_AN.Glut_1
Atpsckmt	1.8271761778890647e-18	2.385604288697661	0.02	0.005	4.58328872461693e-14	Seq_AN.Glut_1
Gm50071	2.0539376441351246e-18	3.046564092450475	0.011	0.002	5.1520971865485464e-14	Seq_AN.Glut_1
4931440P22Rik	2.534187125170969e-18	2.989616536990833	0.012	0.002	6.356754984778858e-14	Seq_AN.Glut_1
Nktr	2.642563832735817e-18	0.3772422269059321	0.728	0.696	6.628607118034524e-14	Seq_AN.Glut_1
Atrip	2.953861037931165e-18	1.4100984349660464	0.044	0.017	7.409465027546534e-14	Seq_AN.Glut_1
9630041A04Rik	3.203503824266001e-18	1.8466393894040745	0.042	0.016	8.035668992788837e-14	Seq_AN.Glut_1
Atp5md	3.2175911141876413e-18	1.6124373352252612	0.033	0.011	8.07100555082828e-14	Seq_AN.Glut_1
Gm12959	3.2209045314392903e-18	2.5718433188284253	0.014	0.002	8.079316926662315e-14	Seq_AN.Glut_1
Vcl	3.4308783344955997e-18	1.0162570822948722	0.143	0.088	8.606015214248763e-14	Seq_AN.Glut_1
Gm43320	3.64139458746439e-18	1.7490066799516364	0.029	0.009	9.134074183195676e-14	Seq_AN.Glut_1
Ccnq	4.265436627991586e-18	3.0173906165653603	0.011	0.002	1.0699421237654095e-13	Seq_AN.Glut_1
Gm9706	4.281927527948641e-18	2.025014543732425	0.022	0.005	1.074078701110637e-13	Seq_AN.Glut_1
Zfp939	4.535422138791456e-18	1.9971674914317692	0.025	0.007	1.1376652892944488e-13	Seq_AN.Glut_1
Nav2	4.8344437599699755e-18	0.5337353636997215	0.479	0.413	1.2126718727508686e-13	Seq_AN.Glut_1
Hacd3	4.8373443838751314e-18	0.5470512167983752	0.533	0.484	1.213399465251238e-13	Seq_AN.Glut_1
Scaper	6.569372610408689e-18	0.4525591561676503	0.586	0.543	1.6478614255949155e-13	Seq_AN.Glut_1
Fam92b	6.7637820433866046e-18	2.359993812748556	0.021	0.005	1.6966270877630958e-13	Seq_AN.Glut_1
Micos10	6.764890292390593e-18	1.8682556401286061	0.031	0.01	1.6969050809432564e-13	Seq_AN.Glut_1
Gm44798	6.828922431296946e-18	2.2879418240488913	0.021	0.005	1.712966902666526e-13	Seq_AN.Glut_1
Adra1b	7.115079050648185e-18	1.3289317261831073	0.096	0.052	1.7847464290645907e-13	Seq_AN.Glut_1
Atf5	7.86896723651638e-18	1.5585901903668784	0.055	0.024	1.9738517416077685e-13	Seq_AN.Glut_1
Prrc1	1.1364168056555648e-17	0.93402	0.18	0.12	2.8505879153064186e-13	Seq_AN.Glut_1
Fbh1	1.2433188723608666e-17	1.6866438543728637	0.033	0.011	3.118741059429998e-13	Seq_AN.Glut_1
Luc7l2	1.282314059600416e-17	0.2211456528679796	0.795	0.767	3.2165565871016836e-13	Seq_AN.Glut_1
Ciao2b	1.3339507290675585e-17	2.190559531793447	0.022	0.006	3.3460820087930637e-13	Seq_AN.Glut_1
Esm1	1.3486191312513013e-17	1.6112769850598978	0.047	0.019	3.382876228830764e-13	Seq_AN.Glut_1
Gm37848	1.482813726521398e-17	2.2632641562903517	0.024	0.007	3.7194899516062746e-13	Seq_AN.Glut_1
Taco1	1.5889254502100335e-17	1.1446698781427953	0.116	0.067	3.985660599306848e-13	Seq_AN.Glut_1
Gm49353	1.6049140065223082e-17	1.8811210461482428	0.032	0.011	4.025766293960558e-13	Seq_AN.Glut_1
Vps26c	1.7190729732111298e-17	2.059285212755796	0.023	0.006	4.312122646002798e-13	Seq_AN.Glut_1
Plin5	1.7401534263512526e-17	2.2733804458793743	0.026	0.007	4.365000854659482e-13	Seq_AN.Glut_1
Krcc1	2.136471099318097e-17	0.904415	0.172	0.112	5.359124105529515e-13	Seq_AN.Glut_1
Adgrb3	2.1759652648790007e-17	0.2936911461079408	0.776	0.743	5.458191270422485e-13	Seq_AN.Glut_1
Ptx4	2.229628099475697e-17	2.6900879319750066	0.015	0.003	5.592799124724839e-13	Seq_AN.Glut_1
Npas4	2.280445877307811e-17	1.586133851720194	0.062	0.028	5.720270438638914e-13	Seq_AN.Glut_1
Pwwp3b	2.340340283294566e-17	2.419965461513316	0.02	0.005	5.870509566616089e-13	Seq_AN.Glut_1
Dap	2.4603991410892685e-17	1.3021496531754884	0.075	0.037	6.171665205508321e-13	Seq_AN.Glut_1
Sgms1	2.462500975607834e-17	0.6553184334179222	0.278	0.206	6.17693744721469e-13	Seq_AN.Glut_1
Qk	2.486251459753246e-17	0.9101227198242337	0.145	0.089	6.236513161645042e-13	Seq_AN.Glut_1
Lamc1	2.6355699229044126e-17	1.1237350926749294	0.113	0.065	6.611063594613428e-13	Seq_AN.Glut_1
A230103L15Rik	2.6780990766082563e-17	1.126188666813667	0.06	0.027	6.71774372376415e-13	Seq_AN.Glut_1
Trio	3.119379040933468e-17	0.5672959954165547	0.428	0.361	7.824650386277512e-13	Seq_AN.Glut_1
Gm37928	3.173234360282536e-17	1.540979843900391	0.039	0.014	7.959741069332713e-13	Seq_AN.Glut_1
Gm38380	3.43017629377773e-17	3.09902	0.011	0.002	8.604254215312058e-13	Seq_AN.Glut_1
Gm37728	3.8965663732614997e-17	2.233765306248099	0.023	0.006	9.774147090689147e-13	Seq_AN.Glut_1
Ambra1	3.9105333887339166e-17	0.4963191819928375	0.397	0.318	9.809181952300155e-13	Seq_AN.Glut_1
Fosb	4.1728831495451855e-17	1.96748	0.034	0.012	1.0467260092319143e-12	Seq_AN.Glut_1
4930588J15Rik	4.553587195874758e-17	2.2364358357346656	0.021	0.005	1.1422218122132244e-12	Seq_AN.Glut_1
Bend7	4.5890198570059866e-17	0.852426	0.125	0.074	1.1511097409313816e-12	Seq_AN.Glut_1
Prorp	4.7931589708609345e-17	2.303178566761309	0.018	0.004	1.2023159962507568e-12	Seq_AN.Glut_1
Ston2	4.808872596045093e-17	1.2896886146034352	0.105	0.06	1.2062576019919513e-12	Seq_AN.Glut_1
Btrc	4.876454607715704e-17	0.5832894627278989	0.396	0.332	1.2232098737994072e-12	Seq_AN.Glut_1
Mga	5.0644054019455804e-17	0.555356	0.407	0.337	1.2703554510240295e-12	Seq_AN.Glut_1
Il6st	5.2243463126622057e-17	0.9293083741690218	0.14	0.086	1.3104750290681876e-12	Seq_AN.Glut_1
2900060N12Rik	5.484465089864346e-17	2.0990074641743766	0.024	0.007	1.3757232231415725e-12	Seq_AN.Glut_1
Sgsm2	5.764947226151965e-17	0.6657658883787178	0.289	0.219	1.4460793622079589e-12	Seq_AN.Glut_1
Mitf	5.824196524188949e-17	1.3087943796941768	0.071	0.035	1.4609414561275561e-12	Seq_AN.Glut_1
2900042K21Rik	6.229793911713604e-17	3.1852079344172584	0.01	0.002	1.5626815048142403e-12	Seq_AN.Glut_1
Zbtb7c	6.827082549822288e-17	0.8518585470650182	0.187	0.126	1.7125053867974227e-12	Seq_AN.Glut_1
Klhl2	6.988589964069975e-17	0.9650983316304907	0.211	0.15	1.7530179065873125e-12	Seq_AN.Glut_1
Det1	7.002526928186198e-17	1.244841582291123	0.09	0.049	1.756513854666226e-12	Seq_AN.Glut_1
Arhgap18	9.063525369588336e-17	0.7544904044923371	0.289	0.22	2.2734947037075383e-12	Seq_AN.Glut_1
Armh4	9.233919430038648e-17	2.189074930228184	0.026	0.008	2.3162363498308942e-12	Seq_AN.Glut_1
Map11	1.0740052490587188e-16	2.2082304074304098	0.022	0.006	2.69403476673889e-12	Seq_AN.Glut_1
Filip1	1.2043123300698924e-16	0.9200311902474574	0.13	0.078	3.020897048747318e-12	Seq_AN.Glut_1
Firre	1.2087246799222771e-16	0.7008468971332168	0.32	0.248	3.03196498711704e-12	Seq_AN.Glut_1
Gem	1.2211817964233444e-16	1.5733428109925387	0.054	0.024	3.063212418148317e-12	Seq_AN.Glut_1
Gucy1b1	1.230512996588548e-16	1.7128764727242585	0.033	0.011	3.086618800642714e-12	Seq_AN.Glut_1
Dclk2	1.2451463222534184e-16	0.6847248754915789	0.3	0.232	3.1233250347404747e-12	Seq_AN.Glut_1
Ajm1	1.3212456252399158e-16	2.444474138626517	0.016	0.003	3.314212526351805e-12	Seq_AN.Glut_1
Nfat5	1.3715967886806305e-16	0.5847989988281548	0.402	0.332	3.4405133847264935e-12	Seq_AN.Glut_1
Abhd17b	1.4272907315223222e-16	1.062882281501982	0.215	0.157	3.580216070950593e-12	Seq_AN.Glut_1
Alpk2	1.5153435266252337e-16	2.846831593727125	0.011	0.002	3.801087702186736e-12	Seq_AN.Glut_1
Gm37297	1.5190839445218716e-16	2.7537875386184156	0.011	0.002	3.810470166438663e-12	Seq_AN.Glut_1
Cadps2	1.523208408375558e-16	0.2810975986620559	0.305	0.222	3.82081597156925e-12	Seq_AN.Glut_1
Mtmr1	1.5442017824222216e-16	0.7372290457001881	0.22	0.155	3.8734757510279005e-12	Seq_AN.Glut_1
Cxxc5	1.679990162783083e-16	1.0886182657100274	0.215	0.159	4.214087324325085e-12	Seq_AN.Glut_1
Plp1	1.6875834227442422e-16	0.9289928608714484	0.039	0.015	4.233134257611657e-12	Seq_AN.Glut_1
Stat5b	1.7714835888991856e-16	0.7240830719714884	0.26	0.193	4.443589434394717e-12	Seq_AN.Glut_1
Sstr1	1.8509068038300665e-16	1.4637245975279363	0.096	0.054	4.642814626727339e-12	Seq_AN.Glut_1
Gm32647	2.0210307201203555e-16	0.8730557938255792	0.323	0.255	5.0695534583498995e-12	Seq_AN.Glut_1
March3	2.032668336229516e-16	0.7483890808840046	0.179	0.119	5.0987452545981184e-12	Seq_AN.Glut_1
Gm48888	2.177651992769967e-16	2.479285457323428	0.015	0.003	5.462422258664185e-12	Seq_AN.Glut_1
Gm42798	2.3118828201936665e-16	2.91237	0.01	0.001	5.799126866173793e-12	Seq_AN.Glut_1
Rnf150	2.3235679253909597e-16	0.7056622277479204	0.338	0.273	5.8284377840506836e-12	Seq_AN.Glut_1
Rev3l	2.350708415236276e-16	0.4019912472802625	0.542	0.486	5.896516988778674e-12	Seq_AN.Glut_1
Fign	2.413886847973167e-16	0.6460608348666615	0.192	0.13	6.054993769455892e-12	Seq_AN.Glut_1
Tcerg1l	2.5025743206938585e-16	1.0600553711097571	0.177	0.12	6.277457426028475e-12	Seq_AN.Glut_1
Gnasas1	2.924468659307398e-16	1.8251062138984322	0.024	0.007	7.335737185006676e-12	Seq_AN.Glut_1
Minar2	2.9963660181042813e-16	2.0298683758832694	0.033	0.012	7.516084519812779e-12	Seq_AN.Glut_1
Tmem179b	3.089625536792651e-16	2.2279806304508973	0.018	0.004	7.750016696490685e-12	Seq_AN.Glut_1
9930017N22Rik	3.1696661076171874e-16	2.347444327371436	0.016	0.004	7.950790464346953e-12	Seq_AN.Glut_1
Gm15478	3.3574261793628537e-16	0.6969438502511213	0.162	0.104	8.421767828313783e-12	Seq_AN.Glut_1
Gm37077	3.3798492501056203e-16	2.0711032629487756	0.024	0.007	8.478013858964938e-12	Seq_AN.Glut_1
Gm42439	4.3586492279017163e-16	0.9255365596865875	0.152	0.097	1.0933235723268665e-11	Seq_AN.Glut_1
Cmtm3	4.4123000991137475e-16	1.864193296166953	0.031	0.011	1.1067813568616924e-11	Seq_AN.Glut_1
Lman1	4.436595337970795e-16	0.7912794003969829	0.274	0.212	1.1128755745765942e-11	Seq_AN.Glut_1
Atp8a1	4.438680607475969e-16	0.40342329709395464	0.571	0.525	1.1133986435792721e-11	Seq_AN.Glut_1
Tnrc6b	4.585159345835381e-16	0.4019935515784072	0.583	0.532	1.1501413703093469e-11	Seq_AN.Glut_1
9630050E16Rik	4.999637614088167e-16	2.9382869472676427	0.01	0.001	1.2541090991178758e-11	Seq_AN.Glut_1
Eif2s3y	5.241191477677061e-16	0.5601643570212537	0.256	0.186	1.3147004702605141e-11	Seq_AN.Glut_1
Elovl5	5.383653446792864e-16	1.1425265779249445	0.163	0.11	1.3504356305935219e-11	Seq_AN.Glut_1
Nf1	5.610609711522976e-16	0.48686514969179484	0.451	0.395	1.4073653400384234e-11	Seq_AN.Glut_1
March7	5.728967207298122e-16	0.5863549989308592	0.386	0.325	1.4370541342786609e-11	Seq_AN.Glut_1
Ppa1	6.210440720443878e-16	0.7678233752373291	0.331	0.269	1.5578269503161425e-11	Seq_AN.Glut_1
Aplp1	6.845488392333854e-16	0.5082040707277884	0.567	0.519	1.7171223083330242e-11	Seq_AN.Glut_1
Ptpre	7.042743340670089e-16	0.7688130521261867	0.266	0.201	1.766601739573685e-11	Seq_AN.Glut_1
Chrdl1	7.24780734196488e-16	2.2639442508471994	0.028	0.009	1.8180399936584703e-11	Seq_AN.Glut_1
Serhl	7.55157691198659e-16	2.12078	0.029	0.01	1.8942375526027163e-11	Seq_AN.Glut_1
Gm37673	8.398672858575742e-16	2.6191951336614094	0.015	0.003	2.106723099845139e-11	Seq_AN.Glut_1
Tet2	8.785752534744728e-16	0.6206221419743618	0.296	0.228	2.2038181658153675e-11	Seq_AN.Glut_1
Zfp862-ps	9.065421807216493e-16	1.8884529314839136	0.028	0.009	2.273970406122185e-11	Seq_AN.Glut_1
5830417I10Rik	9.407326117968819e-16	1.9460277310897531	0.026	0.008	2.3597336834312985e-11	Seq_AN.Glut_1
Stag1	9.44068346568863e-16	0.39261059154805933	0.502	0.436	2.3681010405333358e-11	Seq_AN.Glut_1
Mmut	1.0454054648092124e-15	2.4488145326867334	0.017	0.004	2.6222950679274284e-11	Seq_AN.Glut_1
Gm45846	1.066116711099341e-15	0.6398389550616597	0.339	0.272	2.674247158121587e-11	Seq_AN.Glut_1
Tead1	1.157905425901356e-15	0.6747694855778451	0.237	0.171	2.9044899703309613e-11	Seq_AN.Glut_1
Ntn3	1.171618710228711e-15	2.252876107557171	0.019	0.005	2.938888372737699e-11	Seq_AN.Glut_1
Ralgapa1	1.2275729392366164e-15	0.4403137152265406	0.535	0.497	3.0792439607811284e-11	Seq_AN.Glut_1
Dmxl1	1.2735020694399702e-15	0.7011163212328095	0.375	0.316	3.194452590983221e-11	Seq_AN.Glut_1
Dync2h1	1.295185470624086e-15	0.41580848353843236	0.5	0.441	3.248843234513457e-11	Seq_AN.Glut_1
Plce1	1.4141895716274726e-15	1.5943779115818821	0.051	0.023	3.547353121470352e-11	Seq_AN.Glut_1
Mertk	1.5493098965174587e-15	2.1261034227856026	0.016	0.004	3.8862889444243936e-11	Seq_AN.Glut_1
Rab5if	1.6090814805719627e-15	1.8851102789363239	0.025	0.008	4.036219985866711e-11	Seq_AN.Glut_1
Gm49336	1.795195199151766e-15	2.294436111727947	0.015	0.003	4.50306763755229e-11	Seq_AN.Glut_1
Dok6	1.8216079343674377e-15	0.42691690689081396	0.422	0.344	4.569321342567281e-11	Seq_AN.Glut_1
Epb41l4b	2.008034137123391e-15	0.6064251955060496	0.331	0.265	5.0369528295603146e-11	Seq_AN.Glut_1
Cbfa2t3	2.041846949259849e-15	1.6094663957946969	0.062	0.03	5.121768887523405e-11	Seq_AN.Glut_1
Wdr60	2.2815253070268332e-15	0.6041402818368995	0.357	0.288	5.722978080146109e-11	Seq_AN.Glut_1
Phf14	2.2932166036330043e-15	0.5096808891140006	0.493	0.442	5.752304528553028e-11	Seq_AN.Glut_1
Gm43011	2.321412203712868e-15	2.600146541845115	0.01	0.002	5.823030371793358e-11	Seq_AN.Glut_1
Osbpl6	2.4516914008482187e-15	0.3938829586999515	0.52	0.467	6.149822709887672e-11	Seq_AN.Glut_1
Col6a5	2.4768292390722244e-15	1.5441454998833475	0.046	0.02	6.212878463288768e-11	Seq_AN.Glut_1
Tnrc6c	2.5611796080540667e-15	0.4009544849568125	0.534	0.482	6.42446292884282e-11	Seq_AN.Glut_1
BC067074	2.582318683588046e-15	1.3680818635504899	0.046	0.02	6.477488185912255e-11	Seq_AN.Glut_1
Oasl2	2.777472029928635e-15	1.6609784453126348	0.038	0.015	6.967010839872988e-11	Seq_AN.Glut_1
Gm10766	2.8555987196937294e-15	2.355308635952615	0.017	0.004	7.162983828479751e-11	Seq_AN.Glut_1
Gm48062	3.0740661609315072e-15	1.8611864968359768	0.021	0.006	7.710987558080593e-11	Seq_AN.Glut_1
H2bc6	3.1246256048406273e-15	2.4087620178121876	0.016	0.004	7.837810867182229e-11	Seq_AN.Glut_1
Angpt1	3.4671894096897157e-15	0.8089687679125248	0.177	0.12	8.697097915265683e-11	Seq_AN.Glut_1
Dele1	3.4846544019388725e-15	2.004902224271719	0.026	0.008	8.740907101823468e-11	Seq_AN.Glut_1
A330076H08Rik	3.789687641092059e-15	0.4025846778972024	0.629	0.58	9.50605247891532e-11	Seq_AN.Glut_1
Cfap44	3.969426234085127e-15	0.9351316695664301	0.138	0.087	9.956908765579132e-11	Seq_AN.Glut_1
Prune2	4.0924626448328764e-15	0.591691	0.419	0.359	1.0265533298298788e-10	Seq_AN.Glut_1
Itgb1	4.232014718767058e-15	0.676572	0.285	0.224	1.0615585720555289e-10	Seq_AN.Glut_1
4933432K03Rik	4.36250557983842e-15	1.9756056816235983	0.022	0.006	1.0942908996466692e-10	Seq_AN.Glut_1
Sesn3	5.63122482184043e-15	0.6702973109864008	0.38	0.329	1.4125364343104534e-10	Seq_AN.Glut_1
Mbd5	5.738345449417099e-15	0.4363480491646514	0.515	0.474	1.439406572531785e-10	Seq_AN.Glut_1
Zfp532	6.2992276732482594e-15	0.7673929270083631	0.238	0.176	1.5800982695575935e-10	Seq_AN.Glut_1
Gm37621	6.462624002179386e-15	2.4792143558870157	0.016	0.004	1.6210846047066772e-10	Seq_AN.Glut_1
Rab3ip	6.7854842383464994e-15	0.8665214112395798	0.178	0.123	1.702070866346836e-10	Seq_AN.Glut_1
4933413L06Rik	7.087765875538171e-15	0.8601921764900808	0.078	0.041	1.7778951922199948e-10	Seq_AN.Glut_1
Gm26353	7.182452497601659e-15	2.7482914438771155	0.011	0.002	1.8016463844984e-10	Seq_AN.Glut_1
Tent4a	7.398401575494827e-15	2.0413610831627924	0.024	0.007	1.8558150511971224e-10	Seq_AN.Glut_1
Gm17951	7.421410559657049e-15	2.3454584668613503	0.019	0.005	1.861586624784374e-10	Seq_AN.Glut_1
Kcng2	7.844099820957472e-15	1.592887668741625	0.051	0.023	1.9676139990889723e-10	Seq_AN.Glut_1
Palm3	7.969644450532253e-15	2.1333428443960782	0.03	0.011	1.9991056139715104e-10	Seq_AN.Glut_1
Gm47816	8.106342745191547e-15	2.139151207695046	0.017	0.004	2.0333950142038478e-10	Seq_AN.Glut_1
Jazf1	8.175508231100542e-15	0.6075527641874227	0.317	0.251	2.05074448468926e-10	Seq_AN.Glut_1
Bcr	8.77450580790972e-15	0.8114259885719103	0.258	0.197	2.2009970368560742e-10	Seq_AN.Glut_1
Btbd8	9.183947326178973e-15	1.5232214707718987	0.036	0.014	2.3037013472987337e-10	Seq_AN.Glut_1
Reps1	9.372600547293173e-15	0.7234783298237012	0.228	0.166	2.3510231212830195e-10	Seq_AN.Glut_1
St7	9.484971796971625e-15	0.5965634363744783	0.289	0.224	2.379210325552362e-10	Seq_AN.Glut_1
Gm26846	9.658434593366795e-15	1.9926079416760185	0.023	0.007	2.4227217334001266e-10	Seq_AN.Glut_1
Mdga1	1.1510315282722812e-14	0.9499266492828935	0.122	0.075	2.88724748551819e-10	Seq_AN.Glut_1
Reps2	1.1533782775344548e-14	0.8983678530258826	0.316	0.267	2.8931340713674264e-10	Seq_AN.Glut_1
Tle4	1.194453200869366e-14	0.6803429324591899	0.279	0.216	2.9961664090607174e-10	Seq_AN.Glut_1
Unc79	1.324813552160534e-14	0.46997063506204567	0.395	0.326	3.3231623142394836e-10	Seq_AN.Glut_1
Ctso	1.3706892317291105e-14	1.2972382143352466	0.056	0.026	3.4382368688693007e-10	Seq_AN.Glut_1
Sik1	1.4243692339454962e-14	1.2953692416227351	0.07	0.036	3.5728877864288826e-10	Seq_AN.Glut_1
Gm42640	1.4606404421069144e-14	2.240756535429904	0.016	0.004	3.663870484980984e-10	Seq_AN.Glut_1
Gm38120	1.5493671901481046e-14	2.811061213503053	0.01	0.002	3.8864326597675056e-10	Seq_AN.Glut_1
Galnt16	1.6160243894223504e-14	0.620003	0.353	0.295	4.053635578427024e-10	Seq_AN.Glut_1
Cabcoco1	1.622672638597579e-14	1.5283627719155297	0.046	0.02	4.070312046658167e-10	Seq_AN.Glut_1
6530437J22Rik	1.7190921384730756e-14	1.0624204269135777	0.059	0.028	4.312170720145863e-10	Seq_AN.Glut_1
Pcsk1	1.7377470897267896e-14	0.8916501606280433	0.182	0.127	4.358964799870679e-10	Seq_AN.Glut_1
Rspo3	1.7636942372551303e-14	1.3520916029427277	0.066	0.033	4.424050624730769e-10	Seq_AN.Glut_1
Dlgap3	1.7922977923084785e-14	0.8622577522669106	0.173	0.119	4.4957997822265876e-10	Seq_AN.Glut_1
Btg1	1.86299359887557e-14	1.1175767761699893	0.097	0.057	4.67313314341948e-10	Seq_AN.Glut_1
Gm47962	1.9859190405536536e-14	2.3868623258225004	0.014	0.003	4.981479321324785e-10	Seq_AN.Glut_1
Mir670hg	2.011825519117274e-14	0.8178399267140504	0.193	0.136	5.04646313215377e-10	Seq_AN.Glut_1
Lrfn2	2.4148104782623247e-14	0.7195225448549074	0.251	0.189	6.057310603673215e-10	Seq_AN.Glut_1
Celf6	2.4755747897426662e-14	0.574438	0.398	0.344	6.209731802590504e-10	Seq_AN.Glut_1
Gm42843	2.5189856624181753e-14	1.8387653689453423	0.019	0.005	6.318623635609751e-10	Seq_AN.Glut_1
Apoe	2.5206625818114158e-14	1.1285866352762115	0.038	0.015	6.322830020215755e-10	Seq_AN.Glut_1
Kl	2.695844180379627e-14	1.9393376244177634	0.025	0.008	6.762255542064257e-10	Seq_AN.Glut_1
Gm49915	2.8195161951397607e-14	2.9095755404833277	0.01	0.002	7.072474423888576e-10	Seq_AN.Glut_1
Gm49741	2.9198449588016445e-14	2.0652017676610503	0.017	0.005	7.324139094658045e-10	Seq_AN.Glut_1
Rbks	2.920162515366997e-14	0.996564	0.128	0.081	7.324935653546575e-10	Seq_AN.Glut_1
Gm48960	2.97104269718704e-14	1.788296206725633	0.021	0.006	7.452563501623971e-10	Seq_AN.Glut_1
Mir100hg	3.4500016191708335e-14	0.9281839344170293	0.052	0.024	8.653984061528119e-10	Seq_AN.Glut_1
Pip5k1b	3.451149122523768e-14	0.7190572190986368	0.351	0.295	8.65686245893862e-10	Seq_AN.Glut_1
Apobec3	3.995304785025522e-14	2.704304048148071	0.011	0.002	1.002182252275802e-9	Seq_AN.Glut_1
Kcnb2	4.096282428330601e-14	0.37767714288569665	0.526	0.462	1.0275114843224479e-9	Seq_AN.Glut_1
Brinp2	4.685755107204179e-14	0.6808071195188465	0.269	0.208	1.1753748110910963e-9	Seq_AN.Glut_1
Gm42993	4.908638815458415e-14	2.062661523316537	0.018	0.005	1.2312829604695888e-9	Seq_AN.Glut_1
Rab34	4.9384746412338546e-14	0.5940126302710476	0.185	0.127	1.2387669790071e-9	Seq_AN.Glut_1
5330438D12Rik	5.2701163786686095e-14	0.48755624018480703	0.323	0.255	1.321955992425234e-9	Seq_AN.Glut_1
Ppp1r14b	5.2842456517161e-14	1.3485714085337985	0.052	0.025	1.3255001792764666e-9	Seq_AN.Glut_1
Gm43321	5.4357577206796935e-14	2.247134783986855	0.016	0.004	1.3635054666552942e-9	Seq_AN.Glut_1
Gm12296	5.5508270790597665e-14	0.9845845976221215	0.097	0.056	1.3923694645113518e-9	Seq_AN.Glut_1
Plekha5	5.843321489545498e-14	0.3930131901728737	0.474	0.411	1.4657387624375927e-9	Seq_AN.Glut_1
Gm48890	6.035611912968857e-14	2.957942993982339	0.01	0.002	1.5139728922491082e-9	Seq_AN.Glut_1
Gm48967	6.206922653608625e-14	2.687668810885455	0.01	0.002	1.5569444784311876e-9	Seq_AN.Glut_1
Fkbp9	6.251000386355916e-14	2.7234894392130777	0.022	0.007	1.568000936913518e-9	Seq_AN.Glut_1
Plekhh1	6.846828539807952e-14	1.2130211648959088	0.067	0.034	1.7174584709254267e-9	Seq_AN.Glut_1
Scg3	7.759325661815786e-14	0.6353330331418499	0.449	0.4	1.946349249009872e-9	Seq_AN.Glut_1
Maged1	7.963764438262275e-14	0.37963151265913986	0.636	0.591	1.997630671693709e-9	Seq_AN.Glut_1
Dipk1b	8.154245417423834e-14	1.8334131394755127	0.029	0.01	2.0454109205065946e-9	Seq_AN.Glut_1
Sema6a	8.274272870989604e-14	0.7279485761865953	0.329	0.269	2.0755186069590323e-9	Seq_AN.Glut_1
Gm48887	8.666971452497237e-14	2.678732954951438	0.012	0.002	2.1740231191444067e-9	Seq_AN.Glut_1
Nbea	8.673932494065651e-14	0.2547984065027107	0.722	0.708	2.175769226811428e-9	Seq_AN.Glut_1
Ppp3ca	8.777114043184322e-14	0.26620204820858184	0.726	0.694	2.2016512865923553e-9	Seq_AN.Glut_1
Kcnmb2	8.863537840175043e-14	0.6962936574367414	0.183	0.128	2.2233298318295075e-9	Seq_AN.Glut_1
Gm48383	9.293827683831327e-14	1.7980832620023053	0.025	0.008	2.33126373621225e-9	Seq_AN.Glut_1
Gm42702	9.699412778129772e-14	1.4875420679306726	0.032	0.012	2.433000701266072e-9	Seq_AN.Glut_1
BC039771	9.69995756436871e-14	1.4160721951089132	0.057	0.028	2.433137355446247e-9	Seq_AN.Glut_1
Aff1	1.0363911169039564e-13	1.3068213401269642	0.053	0.025	2.5996834776418843e-9	Seq_AN.Glut_1
Tnfrsf23	1.17188495455848e-13	1.7075954140166805	0.024	0.008	2.9395562200144916e-9	Seq_AN.Glut_1
Gm50020	1.189321015952795e-13	2.179979526342608	0.014	0.003	2.983292836415991e-9	Seq_AN.Glut_1
Ttll11	1.1919347679817807e-13	0.6925264649198987	0.229	0.171	2.9898491720054988e-9	Seq_AN.Glut_1
Serpinh1	1.3325115241906024e-13	2.909950290540234	0.011	0.002	3.342471907279707e-9	Seq_AN.Glut_1
Crppa	1.346552852926155e-13	1.3064734230529642	0.043	0.019	3.3776931762799672e-9	Seq_AN.Glut_1
Grpr	1.3552872512096504e-13	1.703930302555868	0.036	0.015	3.399602540934287e-9	Seq_AN.Glut_1
Gm43829	1.3710302430370052e-13	1.9955469916912696	0.022	0.007	3.439092261634024e-9	Seq_AN.Glut_1
Zfp407	1.3796224041968375e-13	0.8239812277372716	0.177	0.125	3.460644838687347e-9	Seq_AN.Glut_1
Zfp267	1.3988847144498813e-13	2.1239253361975665	0.016	0.004	3.5089624177260824e-9	Seq_AN.Glut_1
Pi4k2b	1.430576190233838e-13	1.641280857672657	0.027	0.01	3.5884573155825597e-9	Seq_AN.Glut_1
Snhg16	1.433207401644042e-13	2.1018407407352138	0.016	0.004	3.595057446283915e-9	Seq_AN.Glut_1
Ssr4	1.5605755065393425e-13	0.8846555796778841	0.391	0.353	3.914547600603287e-9	Seq_AN.Glut_1
Exoc4	1.5815764334455572e-13	0.5113685968309271	0.424	0.37	3.967226325654836e-9	Seq_AN.Glut_1
Gm12353	1.6879264117546963e-13	0.658195	0.258	0.197	4.23399461124548e-9	Seq_AN.Glut_1
Gm47438	1.7580570511101378e-13	1.9450297726944976	0.023	0.007	4.4099103070046695e-9	Seq_AN.Glut_1
Gm44895	1.7667037706892326e-13	2.3522665126314983	0.015	0.004	4.431599738396871e-9	Seq_AN.Glut_1
Cfap298	1.8558654316071037e-13	2.217835601659046	0.016	0.004	4.655252848643259e-9	Seq_AN.Glut_1
Errfi1	2.0969889372135693e-13	1.354165841911726	0.123	0.08	5.260087050106517e-9	Seq_AN.Glut_1
Ly96	2.1403884685702874e-13	1.7412187346819965	0.025	0.008	5.368950434561709e-9	Seq_AN.Glut_1
Gm15398	2.1744279705188218e-13	0.4213784286616306	0.247	0.182	5.454335121249413e-9	Seq_AN.Glut_1
Rit2	2.2885878323030684e-13	0.3373202266452069	0.624	0.599	5.740693718549016e-9	Seq_AN.Glut_1
Syne1	2.4999545308840114e-13	0.23767315569238967	0.776	0.764	6.2708859452694546e-9	Seq_AN.Glut_1
5530401A14Rik	2.5298592873502605e-13	0.5579248902839204	0.119	0.073	6.3458990363893935e-9	Seq_AN.Glut_1
Gm45486	2.569170653793528e-13	1.2918132242221425	0.032	0.012	6.4445076679756854e-9	Seq_AN.Glut_1
AC160336.1	2.64006971339792e-13	2.0613369784432223	0.016	0.004	6.622350869087342e-9	Seq_AN.Glut_1
Zfp711	2.668406064209838e-13	1.0074257301143528	0.142	0.095	6.693429771463958e-9	Seq_AN.Glut_1
Tap1	2.684251868322511e-13	2.534714688310158	0.017	0.005	6.733177386500186e-9	Seq_AN.Glut_1
AA474408	2.705931764777747e-13	2.7402687604225804	0.01	0.002	6.7875592387685005e-9	Seq_AN.Glut_1
Gm10471	2.8932817242564076e-13	2.8745338340813826	0.013	0.003	7.2575078771247725e-9	Seq_AN.Glut_1
Stag2	2.998584611427222e-13	0.6429935639772266	0.294	0.236	7.521649639304043e-9	Seq_AN.Glut_1
Gm37407	3.216157215998829e-13	1.8044514281490525	0.023	0.008	8.067408760611462e-9	Seq_AN.Glut_1
4930431P19Rik	3.399572617205226e-13	1.9763729991130745	0.02	0.006	8.527487952997588e-9	Seq_AN.Glut_1
Dennd5b	3.4398566691228337e-13	0.4934136862622466	0.466	0.417	8.628536468827715e-9	Seq_AN.Glut_1
Gm49338	3.661171938249794e-13	1.84017	0.021	0.007	9.183683689905784e-9	Seq_AN.Glut_1
Sbf2	4.039577467924426e-13	0.4346635985229479	0.475	0.422	1.013287612054163e-8	Seq_AN.Glut_1
Cklf	4.231827468573036e-13	1.182830198529416	0.1	0.061	1.0615116022168604e-8	Seq_AN.Glut_1
Neat1	4.3075265993552677e-13	1.112630996670124	0.029	0.011	1.0804999721822753e-8	Seq_AN.Glut_1
Gm38604	4.4809866376397016e-13	1.9503988859805075	0.021	0.006	1.1240106881855427e-8	Seq_AN.Glut_1
Acads	4.734172059115185e-13	1.2101228621679128	0.06	0.031	1.1875197193084529e-8	Seq_AN.Glut_1
Cfap206	4.863778120444354e-13	1.2321928103023398	0.044	0.02	1.2200301037322618e-8	Seq_AN.Glut_1
Arhgef18	5.018511282337981e-13	0.8151685135717345	0.162	0.112	1.258843370061659e-8	Seq_AN.Glut_1
Gm34220	5.134415330793119e-13	2.110974667463812	0.015	0.004	1.287916741576146e-8	Seq_AN.Glut_1
Prxl2a	5.218660370719384e-13	1.7566848096132022	0.024	0.008	1.3090487673912502e-8	Seq_AN.Glut_1
Sfpq	5.313328995898389e-13	0.4268400634637448	0.469	0.421	1.3327954453311518e-8	Seq_AN.Glut_1
Gm36952	5.329624445617046e-13	1.8990341564546211	0.022	0.007	1.3368829959385798e-8	Seq_AN.Glut_1
Gm4890	6.362138009610468e-13	2.1008919136603854	0.016	0.004	1.59587869833069e-8	Seq_AN.Glut_1
Gm37706	6.714298098948708e-13	2.145278533013127	0.016	0.004	1.684214535140294e-8	Seq_AN.Glut_1
Srrm4os	6.954224286880232e-13	0.7856019588532035	0.163	0.113	1.7443976201210373e-8	Seq_AN.Glut_1
Gm15607	7.393971824127162e-13	2.077041609354901	0.018	0.005	1.8547038923640572e-8	Seq_AN.Glut_1
2900022M07Rik	7.668669720554141e-13	1.6070358574532646	0.03	0.012	1.9236091127038008e-8	Seq_AN.Glut_1
Kcnip3	7.756551179001739e-13	0.7932943439615492	0.124	0.079	1.945653297740796e-8	Seq_AN.Glut_1
Gm42576	7.967937097809965e-13	2.55367	0.01	0.002	1.998677341614652e-8	Seq_AN.Glut_1
Gm37274	8.321538540937079e-13	2.4857349253041026	0.012	0.003	2.087374727608657e-8	Seq_AN.Glut_1
2610037D02Rik	8.328099676146302e-13	0.49124108210872885	0.286	0.221	2.0890205227645385e-8	Seq_AN.Glut_1
Fam135b	8.724130053741054e-13	0.48972012274702176	0.355	0.293	2.188360782680406e-8	Seq_AN.Glut_1
Tspoap1	8.83350880062188e-13	0.5014148580894905	0.29	0.227	2.2157973475479924e-8	Seq_AN.Glut_1
Mir133a-1hg	9.35325730076098e-13	1.1760023024009794	0.059	0.03	2.3461710613228844e-8	Seq_AN.Glut_1
As3mt	9.360126919538701e-13	0.8867192811804174	0.149	0.101	2.347894236497088e-8	Seq_AN.Glut_1
March4	1.019699050840575e-12	0.7843503676006662	0.157	0.108	2.5578130991284985e-8	Seq_AN.Glut_1
Cngb1	1.0408311125777321e-12	1.277260720460633	0.064	0.034	2.6108207627899834e-8	Seq_AN.Glut_1
Ptgds	1.0727797742617577e-12	1.3667581602947725	0.028	0.01	2.690960785758193e-8	Seq_AN.Glut_1
Pcdhga12	1.0883549550135733e-12	1.1313101172581304	0.049	0.024	2.7300295691560474e-8	Seq_AN.Glut_1
Col4a1	1.0907043037018272e-12	0.8020502479665992	0.128	0.082	2.7359226754056632e-8	Seq_AN.Glut_1
Txndc11	1.116246277183425e-12	0.7439699584869619	0.225	0.172	2.799992161686903e-8	Seq_AN.Glut_1
Dzip3	1.1293205882626842e-12	0.36153066322142746	0.59	0.565	2.832787763598117e-8	Seq_AN.Glut_1
Gm43201	1.140795232381069e-12	2.319204223847474	0.013	0.003	2.8615707609046734e-8	Seq_AN.Glut_1
Gm21926	1.2242642370903425e-12	2.0111002138525604	0.022	0.007	3.070944412317415e-8	Seq_AN.Glut_1
Gpx3	1.248146998768748e-12	1.0021244505356623	0.294	0.251	3.130851931711528e-8	Seq_AN.Glut_1
Gm37090	1.2692807472343047e-12	2.8041854908468453	0.01	0.002	3.18386382636253e-8	Seq_AN.Glut_1
Anxa4	1.369926601514171e-12	1.9047974665068388	0.021	0.007	3.4363238872381465e-8	Seq_AN.Glut_1
Nrf1	1.411718160678165e-12	0.5567428549834181	0.287	0.227	3.541153834245109e-8	Seq_AN.Glut_1
Cnot6l	1.6127881580922645e-12	0.7460233940034722	0.233	0.179	4.045517815758636e-8	Seq_AN.Glut_1
Mical3	1.9548502113635964e-12	0.4573399362512598	0.457	0.409	4.903546270184445e-8	Seq_AN.Glut_1
Tspan5	1.9763796497743008e-12	0.7025350072855355	0.31	0.257	4.957550713493856e-8	Seq_AN.Glut_1
Srp54c	2.1342367660757186e-12	2.749044670926282	0.011	0.002	5.3535195040243325e-8	Seq_AN.Glut_1
Lrba	2.273507385360896e-12	0.4827209682340296	0.314	0.25	5.702865925439272e-8	Seq_AN.Glut_1
Rlim	2.335548773019609e-12	0.7713414273838033	0.256	0.203	5.858490542242387e-8	Seq_AN.Glut_1
AC154681.1	2.3702057159849994e-12	1.5331372462575485	0.061	0.032	5.945424017976772e-8	Seq_AN.Glut_1
Lims2	2.468176557047087e-12	2.0384741579723142	0.014	0.003	6.191174075696913e-8	Seq_AN.Glut_1
Gm42727	2.4950353700745732e-12	2.207514520924822	0.014	0.003	6.25854672229506e-8	Seq_AN.Glut_1
Kansl1	2.50021219286685e-12	0.35781187881350207	0.485	0.43	6.271532264587206e-8	Seq_AN.Glut_1
Gm26777	2.5252011968896943e-12	1.7529288542553445	0.023	0.008	6.33421468227811e-8	Seq_AN.Glut_1
Cnr1	2.530191214333745e-12	0.7070848876329014	0.175	0.124	6.346731642034766e-8	Seq_AN.Glut_1
Nkapd1	2.53403909646386e-12	1.9997870998845606	0.016	0.005	6.356383669569946e-8	Seq_AN.Glut_1
Myo9b	2.543424877258292e-12	0.6913902382239607	0.194	0.142	6.379926962114699e-8	Seq_AN.Glut_1
Ctbp2	2.543835678269875e-12	0.7208401975934876	0.222	0.167	6.380957415372154e-8	Seq_AN.Glut_1
Cacna1b	2.612743007635363e-12	0.39050235616621864	0.485	0.432	6.553804560352545e-8	Seq_AN.Glut_1
Cep112	2.723871798955744e-12	0.35509144165510387	0.533	0.475	6.832560020500588e-8	Seq_AN.Glut_1
Ier2	2.8062235084060737e-12	1.7972280473574043	0.035	0.015	7.039131048485795e-8	Seq_AN.Glut_1
Gm48226	2.9203139233789844e-12	2.2930123752692015	0.013	0.003	7.325315445403845e-8	Seq_AN.Glut_1
Ccbe1	3.0857884203087306e-12	1.211436471286933	0.037	0.016	7.74039167350242e-8	Seq_AN.Glut_1
9530051G07Rik	3.1339804000840212e-12	0.9709895957217758	0.066	0.036	7.861276435570759e-8	Seq_AN.Glut_1
AL928616.1	3.279648243612943e-12	2.517375923433817	0.011	0.002	8.226669654278706e-8	Seq_AN.Glut_1
Gm42992	3.3865585973243818e-12	2.0174156234332736	0.019	0.006	8.49484358552848e-8	Seq_AN.Glut_1
Pon2	3.389051702141464e-12	3.2648988637876544	0.011	0.002	8.501097289651649e-8	Seq_AN.Glut_1
Dnajc1	3.429683019447772e-12	0.4532736250501617	0.343	0.284	8.603016885982791e-8	Seq_AN.Glut_1
Fgd4	3.4815128974630692e-12	0.5439435535197821	0.339	0.283	8.733026951996363e-8	Seq_AN.Glut_1
Tmem181b-ps	3.484648370049586e-12	1.515972521206899	0.033	0.014	8.740891971432382e-8	Seq_AN.Glut_1
2210408F21Rik	3.5460318478426502e-12	0.6018079445275735	0.311	0.255	8.894866287128504e-8	Seq_AN.Glut_1
Cep83os	3.5781393153498536e-12	2.3502994529055625	0.012	0.003	8.975404658623573e-8	Seq_AN.Glut_1
Slc22a15	3.596184237731412e-12	0.8522466666547615	0.157	0.109	9.020668541925474e-8	Seq_AN.Glut_1
Invs	4.102776417055564e-12	0.7066378738261139	0.178	0.128	1.0291404364542177e-7	Seq_AN.Glut_1
9630002D21Rik	4.316334207785026e-12	1.4689204995569058	0.025	0.009	1.0827092726807959e-7	Seq_AN.Glut_1
1700028P14Rik	4.358293350960447e-12	2.730780027141793	0.013	0.003	1.0932343041549185e-7	Seq_AN.Glut_1
Slc10a7	4.611344014746954e-12	0.7597701673935982	0.125	0.081	1.1567095326591258e-7	Seq_AN.Glut_1
Gm47802	4.837764090715476e-12	2.0837058771836476	0.014	0.004	1.21350474451507e-7	Seq_AN.Glut_1
Whamm	4.9341032890905456e-12	0.64466	0.217	0.161	1.2376704690354726e-7	Seq_AN.Glut_1
Mbd6	4.977545528786619e-12	0.7551052222727523	0.162	0.113	1.2485675204408356e-7	Seq_AN.Glut_1
Sfmbt1	5.2897396364533255e-12	0.6111979163656494	0.312	0.259	1.3268782904079522e-7	Seq_AN.Glut_1
Gm44127	5.469724487643125e-12	2.7468659789797645	0.011	0.002	1.3720256904804015e-7	Seq_AN.Glut_1
Patl2	5.625935822677226e-12	2.9002576494856473	0.013	0.003	1.4112097417603552e-7	Seq_AN.Glut_1
Rsf1	6.4227749682722514e-12	0.44669895847360175	0.496	0.452	1.6110888730414116e-7	Seq_AN.Glut_1
Gm50240	6.425208429456321e-12	2.3691774454652936	0.014	0.004	1.6116992824448236e-7	Seq_AN.Glut_1
Gm44151	6.677413200562553e-12	0.5207924235582143	0.189	0.134	1.674962327229111e-7	Seq_AN.Glut_1
Vim	6.732592389430726e-12	1.748269785437036	0.023	0.008	1.6888034749648032e-7	Seq_AN.Glut_1
Uggt1	6.751390310438678e-12	0.7324654475940561	0.2	0.148	1.693518745470438e-7	Seq_AN.Glut_1
Urb1	7.091264199963168e-12	0.9493946123869423	0.055	0.028	1.778772711918761e-7	Seq_AN.Glut_1
Pde7a	7.117819321195646e-12	0.5400078582176882	0.242	0.183	1.7854337985287158e-7	Seq_AN.Glut_1
Csf1	7.36722030252822e-12	1.1378844531827632	0.082	0.048	1.8479935406861787e-7	Seq_AN.Glut_1
4933400F21Rik	8.047026262540916e-12	0.9902854265099474	0.057	0.029	2.0185160676957634e-7	Seq_AN.Glut_1
Abtb2	8.525574395165098e-12	1.2533200146339936	0.037	0.016	2.1385550812832133e-7	Seq_AN.Glut_1
Spock1	8.81364861684079e-12	0.4831487344481147	0.473	0.438	2.2108156190483439e-7	Seq_AN.Glut_1
E330034L11Rik	8.873001829498917e-12	2.2414212145797583	0.01	0.002	2.2257037789115082e-7	Seq_AN.Glut_1
Qrfprl	9.165327915138696e-12	2.6369515692029566	0.012	0.003	2.2990308542333905e-7	Seq_AN.Glut_1
Casc4	9.4546579617871e-12	0.40023501011528206	0.544	0.512	2.3716064031346763e-7	Seq_AN.Glut_1
Zfp280d	9.633964160017901e-12	0.42217600306839687	0.425	0.372	2.4165835698988905e-7	Seq_AN.Glut_1
Mta3	9.634285502648079e-12	0.6351884866528924	0.243	0.189	2.416664175484244e-7	Seq_AN.Glut_1
Ciao3	1.0631084561244028e-11	1.9805697723990061	0.019	0.006	2.666701251342452e-7	Seq_AN.Glut_1
Gm44071	1.0711566487819126e-11	1.094236873559082	0.043	0.02	2.6868893378045494e-7	Seq_AN.Glut_1
Atp7b	1.1350712188778874e-11	1.8086273530072257	0.019	0.006	2.847212645433293e-7	Seq_AN.Glut_1
Soga1	1.1370941287329395e-11	0.668005	0.158	0.11	2.8522869125137056e-7	Seq_AN.Glut_1
Atp1a2	1.1637629622707269e-11	2.2259696231783157	0.02	0.006	2.9191830145598914e-7	Seq_AN.Glut_1
Gm49066	1.2302064534835217e-11	1.5870575333037236	0.025	0.009	3.0858498679180657e-7	Seq_AN.Glut_1
Tll1	1.2788968131265945e-11	1.3268160142583167	0.035	0.015	3.2079847660467495e-7	Seq_AN.Glut_1
Zdhhc20	1.3782555713937515e-11	0.38647500191197925	0.488	0.447	3.457216275284086e-7	Seq_AN.Glut_1
Cand2	1.4343952573518685e-11	1.4597122137635732	0.042	0.019	3.598037063541427e-7	Seq_AN.Glut_1
Gm48094	1.4387524155241765e-11	2.1239479532766747	0.015	0.004	3.6089665591008444e-7	Seq_AN.Glut_1
Tiam1	1.5193185558866963e-11	0.6610487129926579	0.203	0.152	3.811058665586189e-7	Seq_AN.Glut_1
Gm41077	1.5621226650879108e-11	2.0385054155098867	0.021	0.007	3.9184284931065156e-7	Seq_AN.Glut_1
Gm10548	1.6291287531821292e-11	2.6396790321443033	0.011	0.003	4.086506564482053e-7	Seq_AN.Glut_1
Alkbh1	1.7628617428515402e-11	0.7063991481972596	0.215	0.163	4.4219623957688036e-7	Seq_AN.Glut_1
Erc2	1.7987535558916407e-11	0.3724959585152603	0.597	0.58	4.511993419598592e-7	Seq_AN.Glut_1
Eef1akmt3	1.8161602555332385e-11	1.5381716605431501	0.015	0.004	4.5556563849795754e-7	Seq_AN.Glut_1
Exoc6b	1.8228708780957332e-11	0.5557416286979178	0.393	0.349	4.572489310615337e-7	Seq_AN.Glut_1
Prdm5	1.861140752093917e-11	1.0997587636803159	0.069	0.039	4.668485462552382e-7	Seq_AN.Glut_1
Mettl7a1	1.8681370555201123e-11	1.0468382107559229	0.131	0.089	4.6860349900666497e-7	Seq_AN.Glut_1
Gkap1	1.8787858840699214e-11	0.43003066737188034	0.425	0.371	4.7127465116009907e-7	Seq_AN.Glut_1
Sybu	1.896301116686542e-11	0.3922675285348931	0.532	0.503	4.7566817210965224e-7	Seq_AN.Glut_1
Med27	1.9328403526171505e-11	0.7284939315552187	0.184	0.135	4.84833674050486e-7	Seq_AN.Glut_1
A830011K09Rik	2.0149692858175745e-11	1.217763836790454	0.049	0.024	5.054348956544804e-7	Seq_AN.Glut_1
Rdh12	2.1110523259681217e-11	1.3429823989929521	0.034	0.015	5.295363654458437e-7	Seq_AN.Glut_1
Rbm26	2.140262278947552e-11	0.43999233824542494	0.442	0.398	5.36863390051204e-7	Seq_AN.Glut_1
Gm48562	2.149021062172614e-11	2.7095042760524857	0.01	0.002	5.390604432353785e-7	Seq_AN.Glut_1
Plcg2	2.3660873255858985e-11	1.613525185136501	0.031	0.013	5.935093447499668e-7	Seq_AN.Glut_1
A130014A01Rik	2.6369238201571386e-11	2.026526320380521	0.017	0.005	6.614459710482166e-7	Seq_AN.Glut_1
Yju2	2.8338086124204975e-11	2.3085330370797132	0.012	0.003	7.108325523395576e-7	Seq_AN.Glut_1
Son	2.9376701086925905e-11	0.20415394559305788	0.762	0.769	7.368851700644494e-7	Seq_AN.Glut_1
Yipf5	2.952896499113756e-11	0.7131487795933823	0.276	0.227	7.407045578376945e-7	Seq_AN.Glut_1
Gm31323	2.982593401291734e-11	2.126685784268844	0.014	0.004	7.481537287800185e-7	Seq_AN.Glut_1
Gm48225	3.309602896051709e-11	2.3885442474439724	0.01	0.002	8.301807904456107e-7	Seq_AN.Glut_1
Mxd4	3.390704780610515e-11	0.9296848636599128	0.174	0.129	8.505243871683417e-7	Seq_AN.Glut_1
A330093E20Rik	3.771660915225587e-11	1.6990990728835942	0.033	0.014	9.460834239751863e-7	Seq_AN.Glut_1
Srsf5	3.7987342186084405e-11	0.38998075957033884	0.597	0.583	9.528744913957412e-7	Seq_AN.Glut_1
Gm44235	3.8111079901035615e-11	1.5619920101726086	0.026	0.01	9.559783282375773e-7	Seq_AN.Glut_1
Rpgr	3.823427990429802e-11	0.7219309560696344	0.253	0.203	9.590686771194116e-7	Seq_AN.Glut_1
Lgals9	3.9111756648272316e-11	2.4055755864721604	0.012	0.003	9.810793037652627e-7	Seq_AN.Glut_1
Gcnt2	4.0605487607275915e-11	1.4474545677586543	0.042	0.02	1.018548051140909e-6	Seq_AN.Glut_1
Ntrk2	4.340811285848584e-11	0.34057836012909126	0.637	0.621	1.0888491029422588e-6	Seq_AN.Glut_1
Unk	4.8420187822018286e-11	0.7566277398691248	0.206	0.156	1.2145719913275067e-6	Seq_AN.Glut_1
4930467D21Rik	4.8956259918798785e-11	1.7295266134077831	0.032	0.014	1.2280188238031487e-6	Seq_AN.Glut_1
Gm42635	4.9397296520317584e-11	2.4245470014214963	0.01	0.002	1.2390817859156462e-6	Seq_AN.Glut_1
3110080E11Rik	4.9565251991101923e-11	2.4706572093897536	0.01	0.002	1.2432947809448006e-6	Seq_AN.Glut_1
Tspan9	4.9891790710053635e-11	1.1854987313119851	0.059	0.032	1.2514856781709854e-6	Seq_AN.Glut_1
Spata1	5.090307017923262e-11	0.8104905041580182	0.123	0.082	1.276852612375871e-6	Seq_AN.Glut_1
Samd14	5.401108217393136e-11	0.8200058014891528	0.175	0.129	1.3548139852508943e-6	Seq_AN.Glut_1
Cdh13	5.4123638655886005e-11	0.2636585369437714	0.415	0.355	1.3576373520442447e-6	Seq_AN.Glut_1
Gm15645	5.6127416378844163e-11	2.235239581608277	0.013	0.004	1.407900112446927e-6	Seq_AN.Glut_1
Mettl25	5.686484546748935e-11	0.7116915163736147	0.157	0.111	1.426397783706503e-6	Seq_AN.Glut_1
D130043K22Rik	6.03234317269805e-11	0.6412394635136887	0.33	0.284	1.5131529614395789e-6	Seq_AN.Glut_1
Sgsm1	6.616084222386635e-11	0.5064954672696971	0.38	0.331	1.6595785663434635e-6	Seq_AN.Glut_1
Tekt1	6.881304806973126e-11	0.9146209913312895	0.076	0.045	1.726106497781139e-6	Seq_AN.Glut_1
Gm43319	7.15005956347189e-11	1.6306405016202623	0.019	0.006	1.7935209409012888e-6	Seq_AN.Glut_1
Lrrc20	8.0475100165322e-11	0.9591873289086179	0.1	0.064	2.018637412546937e-6	Seq_AN.Glut_1
Lrrc10b	8.414396571751752e-11	1.9676147800733368	0.016	0.005	2.1106672360582095e-6	Seq_AN.Glut_1
Zfand3	9.08201340412853e-11	0.5455312804322138	0.258	0.206	2.2781322422916005e-6	Seq_AN.Glut_1
Wipi1	9.105528562022942e-11	1.0243691546099856	0.121	0.082	2.284030784497835e-6	Seq_AN.Glut_1
Plxnc1	9.339880076015347e-11	0.625047	0.332	0.286	2.3428155182676895e-6	Seq_AN.Glut_1
Gm11714	1.0077434010008278e-10	1.6612520250727036	0.032	0.014	2.5278235470704767e-6	Seq_AN.Glut_1
Rab8b	1.0256156496745901e-10	0.8514892737156834	0.163	0.119	2.572654295643742e-6	Seq_AN.Glut_1
Skap2	1.0468739314991505e-10	1.3699510699692588	0.052	0.027	2.625978569772469e-6	Seq_AN.Glut_1
Gm42696	1.0512012938516495e-10	2.0181198644694893	0.016	0.005	2.6368333254974777e-6	Seq_AN.Glut_1
Gm49417	1.0854103363890386e-10	1.7814270884921433	0.016	0.005	2.7226432877982646e-6	Seq_AN.Glut_1
Gm49359	1.0975760847582865e-10	2.475131651318433	0.01	0.002	2.753159851007686e-6	Seq_AN.Glut_1
Rnf217	1.1228693624872928e-10	0.6382366494546546	0.197	0.148	2.8166055088631252e-6	Seq_AN.Glut_1
Gpatch8	1.1684466198567837e-10	0.33240347656923586	0.589	0.561	2.930931501248756e-6	Seq_AN.Glut_1
Crem	1.1684984270596349e-10	0.8096425981523776	0.144	0.102	2.931061454436388e-6	Seq_AN.Glut_1
Gaa	1.3142915256939255e-10	0.5345563623729435	0.589	0.558	3.2967688630506426e-6	Seq_AN.Glut_1
Gm45345	1.3250540379550056e-10	1.461355139044997	0.033	0.015	3.3237655488063358e-6	Seq_AN.Glut_1
N4bp2l1	1.354037605922091e-10	0.6474800201676009	0.406	0.37	3.396467930694973e-6	Seq_AN.Glut_1
Gm14280	1.3627472697638183e-10	1.7429017365375974	0.02	0.007	3.418315251475562e-6	Seq_AN.Glut_1
Stx2	1.4582652195098502e-10	0.7457299952545368	0.167	0.122	3.6579124766185082e-6	Seq_AN.Glut_1
Uhrf2	1.511210337695276e-10	0.534854	0.286	0.234	3.7907200110748305e-6	Seq_AN.Glut_1
Gm44587	1.5777433836263668e-10	1.9940544232828064	0.012	0.003	3.957611503488379e-6	Seq_AN.Glut_1
Thada	1.5818663813748358e-10	0.5428182372650878	0.211	0.16	3.967953631040638e-6	Seq_AN.Glut_1
Thoc2	1.6420603592014642e-10	0.37681317986254426	0.556	0.526	4.118944205020953e-6	Seq_AN.Glut_1
Eef1aknmt	1.6505605982306826e-10	2.0073526514167686	0.014	0.004	4.140266204601845e-6	Seq_AN.Glut_1
Ksr2	1.6784488873952404e-10	0.45487239785350664	0.384	0.33	4.210221189142221e-6	Seq_AN.Glut_1
N4bp2l2	1.782769038038039e-10	0.4273951391056654	0.457	0.423	4.471897855014617e-6	Seq_AN.Glut_1
Ago2	1.804383264085946e-10	0.6336278156665102	0.279	0.231	4.526114979633187e-6	Seq_AN.Glut_1
Gm21811	1.8158192540642845e-10	2.0834523779313407	0.014	0.004	4.554801016894851e-6	Seq_AN.Glut_1
Slc9a9	1.831996605406054e-10	0.413865	0.235	0.179	4.595380285000546e-6	Seq_AN.Glut_1
Lims1	1.9090811734584474e-10	0.43805151668146647	0.279	0.223	4.78873921550317e-6	Seq_AN.Glut_1
Rpl19-ps6	1.945719815926777e-10	2.244447600995448	0.01	0.002	4.880643586270728e-6	Seq_AN.Glut_1
Gm50455	2.0039384509459227e-10	2.0196150896152947	0.013	0.003	5.026679210352752e-6	Seq_AN.Glut_1
Bcl6	2.0153926556843184e-10	1.3043434326536913	0.058	0.032	5.055410937518544e-6	Seq_AN.Glut_1
Ikzf2	2.0888788373387496e-10	0.8349767899048703	0.1	0.064	5.239743675580519e-6	Seq_AN.Glut_1
Gm43361	2.1661854686019721e-10	2.037626708696962	0.012	0.003	5.433659629441187e-6	Seq_AN.Glut_1
2810454H06Rik	2.1678052901288423e-10	1.388584471932179	0.039	0.018	5.437722789759188e-6	Seq_AN.Glut_1
Rbm4b	2.2117120937153266e-10	0.48009983608422935	0.31	0.256	5.547858615875526e-6	Seq_AN.Glut_1
Gm49179	2.2256450076890958e-10	1.6217058600955436	0.022	0.008	5.582807937287328e-6	Seq_AN.Glut_1
Cd164l2	2.3380516588794195e-10	1.663000078324314	0.031	0.013	5.864768781133136e-6	Seq_AN.Glut_1
Slc30a7	2.339341551329736e-10	0.7485839319804721	0.117	0.078	5.86800434735551e-6	Seq_AN.Glut_1
Ak5	2.386070235536004e-10	0.5571445004886499	0.38	0.338	5.985218578818513e-6	Seq_AN.Glut_1
Gm13665	2.423374735084559e-10	2.2693280099163493	0.01	0.002	6.078793185486108e-6	Seq_AN.Glut_1
5330417C22Rik	2.427360332913981e-10	0.4542339924489501	0.315	0.261	6.0887906590814305e-6	Seq_AN.Glut_1
Rin2	2.4605985650242304e-10	1.0340911152069554	0.103	0.067	6.17216544050678e-6	Seq_AN.Glut_1
Col4a2	2.5366919392479507e-10	0.6029670871911751	0.239	0.187	6.363038060409559e-6	Seq_AN.Glut_1
Gm49538	2.56444123870025e-10	1.8934634019500711	0.015	0.004	6.432644403155707e-6	Seq_AN.Glut_1
Nlrp5-ps	2.5961979853397753e-10	1.9713461486736534	0.016	0.005	6.512303026426292e-6	Seq_AN.Glut_1
Gm43175	2.605958829806825e-10	1.8417497375701695	0.019	0.007	6.536787128687439e-6	Seq_AN.Glut_1
Gm37204	2.800263709966424e-10	2.354104532414704	0.012	0.003	7.024181490079778e-6	Seq_AN.Glut_1
Ism1	3.038357776092493e-10	1.997020842542792	0.035	0.016	7.6214166455504085e-6	Seq_AN.Glut_1
4930414N06Rik	3.0541182862987475e-10	2.0489713087501045	0.014	0.004	7.660950309351779e-6	Seq_AN.Glut_1
Odc1	3.10324822863777e-10	1.2237197107082904	0.072	0.043	7.784187856714983e-6	Seq_AN.Glut_1
Gm12068	3.1930958114281743e-10	1.8762651174288831	0.026	0.011	8.009561533386432e-6	Seq_AN.Glut_1
Ifi27	3.3040916084534724e-10	0.8444156799052212	0.058	0.031	8.28798339064469e-6	Seq_AN.Glut_1
Rdh5	3.347631713136855e-10	1.3107747770777216	0.02	0.007	8.397199389232487e-6	Seq_AN.Glut_1
Fam120c	3.386296894727902e-10	0.4724165629397286	0.342	0.29	8.49418713073547e-6	Seq_AN.Glut_1
Rnpc3	3.417178610716697e-10	0.41768076710539814	0.602	0.582	8.571650827121762e-6	Seq_AN.Glut_1
Sh3gl1	3.437679868281991e-10	0.7015026714542641	0.194	0.148	8.623076181598546e-6	Seq_AN.Glut_1
Acbd7	3.5178780963534683e-10	1.882995467340816	0.024	0.009	8.82424541689304e-6	Seq_AN.Glut_1
Ptprf	3.5473369105943444e-10	0.6862781691089531	0.267	0.22	8.898139906534854e-6	Seq_AN.Glut_1
Gm44562	3.5847192858770276e-10	1.1827953556469248	0.043	0.021	8.991909856693936e-6	Seq_AN.Glut_1
A230057D06Rik	3.6699315819120633e-10	0.21599062938110825	0.674	0.637	9.20565638006822e-6	Seq_AN.Glut_1
Trip4	3.677922147506353e-10	0.5905400451788939	0.284	0.236	9.225699914804935e-6	Seq_AN.Glut_1
Fhad1	3.8147920320958404e-10	0.6754294012390551	0.197	0.15	9.569024333309206e-6	Seq_AN.Glut_1
Gm7265	3.900516838234994e-10	2.286267678765328	0.011	0.003	9.784056437028658e-6	Seq_AN.Glut_1
Baiap3	4.120475469413511e-10	0.3595453448766408	0.529	0.487	1.033580066747685e-5	Seq_AN.Glut_1
Creb3l1	4.490345820683049e-10	1.5286635813832512	0.023	0.009	1.126358345660136e-5	Seq_AN.Glut_1
Agpat4	5.144974150582115e-10	0.557428	0.323	0.277	1.2905653159320178e-5	Seq_AN.Glut_1
Usp20	5.156686987579706e-10	0.6908203246536796	0.247	0.201	1.2935033639644934e-5	Seq_AN.Glut_1
Zcchc7	5.235134840485631e-10	0.34853912633180384	0.541	0.514	1.3131812233874157e-5	Seq_AN.Glut_1
4930578M01Rik	5.325567921596896e-10	1.1386032171096367	0.034	0.016	1.3358654574533655e-5	Seq_AN.Glut_1
Kdm2a	5.698359375216614e-10	0.45868878813273734	0.33	0.278	1.4293764656793354e-5	Seq_AN.Glut_1
Dnah9	5.703394633589943e-10	0.9727107669503059	0.112	0.076	1.4306395098897014e-5	Seq_AN.Glut_1
Gm38260	5.753669381482029e-10	1.6476319107771547	0.02	0.007	1.4432504276509522e-5	Seq_AN.Glut_1
Gpatch2	5.987494164822009e-10	0.6433249054548331	0.217	0.169	1.5019030363039526e-5	Seq_AN.Glut_1
Gm49521	6.178343238688778e-10	1.8830045719596153	0.019	0.006	1.549775617992693e-5	Seq_AN.Glut_1
Manf	6.267449271989999e-10	0.6667552461510938	0.366	0.336	1.5721269753859713e-5	Seq_AN.Glut_1
Ralgps1	6.604427607571177e-10	0.5331786249814306	0.282	0.231	1.6566546210831543e-5	Seq_AN.Glut_1
Copa	6.707896957459153e-10	0.44638467515121816	0.383	0.337	1.682608872809054e-5	Seq_AN.Glut_1
P4hb	7.180410892161117e-10	0.9191319168890265	0.228	0.188	1.8011342681896945e-5	Seq_AN.Glut_1
Runx2os1	7.403014728583495e-10	2.0556773852548824	0.012	0.003	1.856972214517884e-5	Seq_AN.Glut_1
Itsn2	7.42968863812459e-10	0.45484086484902453	0.415	0.367	1.863663097987172e-5	Seq_AN.Glut_1
C230013L11Rik	8.179935068100949e-10	2.0432917907295884	0.013	0.004	2.051854912482442e-5	Seq_AN.Glut_1
Dmac2l	8.223227719422204e-10	1.5616345879626508	0.024	0.01	2.0627144411398656e-5	Seq_AN.Glut_1
S100b	8.354611371435461e-10	1.7140884863740746	0.02	0.007	2.095670716410871e-5	Seq_AN.Glut_1
Ift122	8.964235451732899e-10	0.8170128652168841	0.182	0.138	2.24858882071268e-5	Seq_AN.Glut_1
Ubn1	9.465453474915359e-10	0.5832401272961896	0.215	0.168	2.3743143496477687e-5	Seq_AN.Glut_1
Gm5124	9.777101991387706e-10	2.29142	0.012	0.003	2.452488263519692e-5	Seq_AN.Glut_1
Cnga3	9.908631607049486e-10	2.2054930883547157	0.019	0.006	2.485481152312293e-5	Seq_AN.Glut_1
Pwwp3a	9.9646894987788255e-10	1.7790466957864304	0.018	0.006	2.4995427138736806e-5	Seq_AN.Glut_1
Zc3h12b	1.0079815844707725e-9	0.549401	0.261	0.21	2.528421006486486e-5	Seq_AN.Glut_1
Fermt2	1.0168599497040097e-9	0.5843044382846236	0.222	0.174	2.550691497837538e-5	Seq_AN.Glut_1
Gm37861	1.0215492089200328e-9	1.957000956639904	0.012	0.003	2.5624540356550104e-5	Seq_AN.Glut_1
Gm37060	1.0307595313195004e-9	2.513575329285043	0.011	0.003	2.5855572083618347e-5	Seq_AN.Glut_1
Tlk1	1.1023811519685691e-9	0.6278936295342341	0.235	0.189	2.7652128815979587e-5	Seq_AN.Glut_1
Mfap3	1.1217361124704594e-9	0.5500212817274781	0.199	0.152	2.8137628645209004e-5	Seq_AN.Glut_1
Pgap1	1.1939913871844051e-9	0.5519490220613263	0.362	0.319	2.995007995613362e-5	Seq_AN.Glut_1
Pacc1	1.1942384422116124e-9	2.242105011650871	0.014	0.004	2.9956277084436087e-5	Seq_AN.Glut_1
Gm46210	1.1946999672450352e-9	1.5018062689651357	0.025	0.01	2.9967853978374462e-5	Seq_AN.Glut_1
1500026H17Rik	1.2032468835346442e-9	1.7381157257382602	0.018	0.006	3.0182244826583015e-5	Seq_AN.Glut_1
Gm42467	1.360560670999941e-9	2.0616736613627964	0.01	0.002	3.4128303871362517e-5	Seq_AN.Glut_1
E130307A14Rik	1.3716522620033355e-9	0.3385404263770809	0.368	0.311	3.440652534009167e-5	Seq_AN.Glut_1
B930086L07Rik	1.3810991130794113e-9	2.435178397451768	0.011	0.003	3.4643490152483956e-5	Seq_AN.Glut_1
Csrnp1	1.3951384210838593e-9	2.553049663376557	0.011	0.003	3.499565215446753e-5	Seq_AN.Glut_1
BX322656.1	1.4175232983722422e-9	1.4152007401183884	0.023	0.009	3.5557154416369325e-5	Seq_AN.Glut_1
Gm38020	1.4936043317489065e-9	1.7840587434308715	0.017	0.006	3.746557105758957e-5	Seq_AN.Glut_1
Slc7a8	1.520193939852263e-9	0.9388059944229838	0.132	0.094	3.813254478725416e-5	Seq_AN.Glut_1
Ly6h	1.5671698520803034e-9	0.5299675354553561	0.704	0.687	3.931088856958233e-5	Seq_AN.Glut_1
Cwf19l2	1.6017082511697921e-9	0.4963769486061136	0.356	0.31	4.0177249772343065e-5	Seq_AN.Glut_1
Plod1	1.6802327936265127e-9	1.2823859898354306	0.035	0.017	4.2146959395327443e-5	Seq_AN.Glut_1
Snhg18	1.7063127085547285e-9	1.6905559577041576	0.016	0.005	4.280114798138681e-5	Seq_AN.Glut_1
Angpt2	1.7371258913856531e-9	0.9871785900460806	0.074	0.045	4.357406585951772e-5	Seq_AN.Glut_1
Slc7a14	1.7494603450002753e-9	0.4908843106660288	0.359	0.317	4.388346329398691e-5	Seq_AN.Glut_1
Parp8	1.7653090438432234e-9	0.466848	0.304	0.253	4.4281012055763416e-5	Seq_AN.Glut_1
Scaf8	1.7702609070492614e-9	0.5294049051716757	0.334	0.292	4.440522459242367e-5	Seq_AN.Glut_1
4930538E20Rik	1.8008474181784882e-9	1.5367250626535416	0.027	0.012	4.51724566375892e-5	Seq_AN.Glut_1
1700025G04Rik	1.8312940444930066e-9	0.5037500765154328	0.389	0.351	4.593617981206258e-5	Seq_AN.Glut_1
Gm42979	1.8814927855213717e-9	2.2126151007451007	0.01	0.002	4.7195365032018086e-5	Seq_AN.Glut_1
Tnxb	1.956817412421851e-9	1.6104380797256868	0.019	0.007	4.908480797318971e-5	Seq_AN.Glut_1
Gm48261	2.0151679271661444e-9	2.142556136261775	0.011	0.003	5.054847228503557e-5	Seq_AN.Glut_1
Mkln1	2.0655132195207317e-9	0.45646582615445724	0.401	0.362	5.181133359845803e-5	Seq_AN.Glut_1
Tasp1	2.104741894404122e-9	0.5254552433818995	0.274	0.227	5.2795345679233e-5	Seq_AN.Glut_1
Gm44586	2.1129991865279643e-9	1.9997956072656473	0.012	0.004	5.300247159486746e-5	Seq_AN.Glut_1
Bag3	2.119136271949714e-9	1.8168470987323797	0.02	0.007	5.315641424558662e-5	Seq_AN.Glut_1
Lancl3	2.142836424635048e-9	1.3782980005185137	0.053	0.029	5.375090887554554e-5	Seq_AN.Glut_1
Auts2	2.193438029650734e-9	0.45462029689980543	0.56	0.544	5.5020199535759015e-5	Seq_AN.Glut_1
Abitram	2.265170792061917e-9	2.0244673340709696	0.015	0.005	5.681954414808113e-5	Seq_AN.Glut_1
Gm44801	2.2977995638408413e-9	2.0716450305327845	0.013	0.004	5.7638004259383664e-5	Seq_AN.Glut_1
Adamtsl1	2.3738839408851824e-9	0.6051665286661424	0.13	0.09	5.9546504773163916e-5	Seq_AN.Glut_1
Zscan30	2.56620290015937e-9	2.1440686358823013	0.011	0.003	6.437063354759764e-5	Seq_AN.Glut_1
Frem1	2.5736821649005396e-9	1.6735998002413917	0.031	0.014	6.455824342436514e-5	Seq_AN.Glut_1
Csad	2.6444372784118628e-9	0.7507999831565051	0.147	0.106	6.633306469168317e-5	Seq_AN.Glut_1
Ripor2	2.702073660330146e-9	0.5201083512536698	0.321	0.275	6.777881569572139e-5	Seq_AN.Glut_1
Gm45251	2.936231027458604e-9	2.0968422949183863	0.013	0.004	7.365241909277163e-5	Seq_AN.Glut_1
B230307C23Rik	3.1041044822575783e-9	0.5607848852145658	0.159	0.115	7.786335683294909e-5	Seq_AN.Glut_1
Plekha6	3.2220428407090084e-9	0.5392576500302289	0.301	0.256	8.082172261634476e-5	Seq_AN.Glut_1
D430042O09Rik	3.2553674387661744e-9	0.5496122235516274	0.22	0.173	8.165763683401072e-5	Seq_AN.Glut_1
Sptbn2	3.2624396599031623e-9	0.7829188302390295	0.24	0.197	8.183503642901092e-5	Seq_AN.Glut_1
Usp3	3.2934569374608425e-9	0.7186623294531242	0.157	0.115	8.261307381926777e-5	Seq_AN.Glut_1
Plod2	3.346595025765901e-9	0.959119	0.062	0.036	8.394598962631186e-5	Seq_AN.Glut_1
Prickle2	3.6380660279152194e-9	0.3664687913364416	0.401	0.35	9.125724824422536e-5	Seq_AN.Glut_1
Tmprss9	3.656312531708044e-9	2.2376232522316473	0.017	0.006	9.171494354536457e-5	Seq_AN.Glut_1
Gm43715	3.7491514793653606e-9	2.532898110648267	0.01	0.003	9.40437157084007e-5	Seq_AN.Glut_1
Gm37679	3.95139790729939e-9	0.5558969392024741	0.175	0.13	9.911686510669791e-5	Seq_AN.Glut_1
Asb5	4.039713907216132e-9	1.44111	0.044	0.023	1.0133218364860945e-4	Seq_AN.Glut_1
Card10	4.214958640916106e-9	1.3742347245330206	0.041	0.021	1.0572802254873961e-4	Seq_AN.Glut_1
Slc6a6	4.647030416760461e-9	0.4813336055309088	0.326	0.282	1.165661109740194e-4	Seq_AN.Glut_1
Rtf2	4.7266378371962254e-9	2.053	0.013	0.004	1.1856298350823012e-4	Seq_AN.Glut_1
Stx3	5.114297208890271e-9	0.4582897642357814	0.277	0.227	1.2828703118780355e-4	Seq_AN.Glut_1
Gm38104	5.114327470689211e-9	1.8396580405174427	0.013	0.004	1.2828779027476817e-4	Seq_AN.Glut_1
Olfr1322	5.288790646794612e-9	2.1164370558538446	0.01	0.002	1.3266402458419604e-4	Seq_AN.Glut_1
Foxp1	5.366728429343378e-9	0.23812399597709838	0.361	0.306	1.346190159216493e-4	Seq_AN.Glut_1
Cecr2	5.671611429762526e-9	1.1544837050064087	0.019	0.007	1.4226670110416322e-4	Seq_AN.Glut_1
Gm49936	5.740640853985844e-9	2.1814838180446037	0.012	0.004	1.439982351813809e-4	Seq_AN.Glut_1
Gm20033	5.853931547898827e-9	1.309137019579437	0.042	0.022	1.4684001894749418e-4	Seq_AN.Glut_1
5330439K02Rik	5.855826475366744e-9	0.9015513151277048	0.104	0.071	1.468875513080994e-4	Seq_AN.Glut_1
Lrrc9	6.011892275100931e-9	0.9380071139630104	0.068	0.041	1.5080230582863177e-4	Seq_AN.Glut_1
Shld1	6.207322751591287e-9	1.956983256068236	0.013	0.004	1.5570448390091584e-4	Seq_AN.Glut_1
Ddx17	6.291343848734415e-9	0.3729014666002508	0.58	0.557	1.5781206910165407e-4	Seq_AN.Glut_1
Zfp52	6.320298212576317e-9	1.0940313637692696	0.04	0.02	1.5853836036426434e-4	Seq_AN.Glut_1
Utp25	6.4467646133263735e-9	1.8034808402541573	0.013	0.004	1.6171064356067876e-4	Seq_AN.Glut_1
H2bu2	6.505764351570971e-9	2.320849544022348	0.011	0.003	1.6319059299480624e-4	Seq_AN.Glut_1
Tgfbr3	6.584557027715417e-9	0.6941961752615418	0.135	0.097	1.651670284832135e-4	Seq_AN.Glut_1
Plagl1	6.7586027293654025e-9	0.7375426291161278	0.077	0.048	1.6953279086340175e-4	Seq_AN.Glut_1
Gm20650	6.912373462576434e-9	1.3483377092984363	0.033	0.016	1.7338997593526728e-4	Seq_AN.Glut_1
Gm32950	7.00364087722971e-9	1.6279835639990399	0.019	0.007	1.7567932776443005e-4	Seq_AN.Glut_1
Rps11-ps2	7.102282497684559e-9	1.7664162212099699	0.016	0.005	1.7815365417191947e-4	Seq_AN.Glut_1
Gm13402	7.14198545172359e-9	0.8005848149970549	0.079	0.049	1.7914956307103454e-4	Seq_AN.Glut_1
Nek10	7.1531973142996404e-9	0.8136087117537869	0.114	0.079	1.7943080143189219e-4	Seq_AN.Glut_1
Fcsk	7.3440112126739825e-9	1.6960878677443532	0.016	0.005	1.8421717725871416e-4	Seq_AN.Glut_1
Gabrg2	7.460743567462974e-9	0.5466664354951316	0.548	0.545	1.8714529164624123e-4	Seq_AN.Glut_1
Zfp799	7.466395596210236e-9	0.6092531368383898	0.201	0.158	1.8728706713533758e-4	Seq_AN.Glut_1
Krt90	7.56694349574764e-9	1.477788679356327	0.02	0.008	1.898092106473338e-4	Seq_AN.Glut_1
Gm48747	7.59240445037233e-9	1.908339840696211	0.015	0.005	1.9044787323313955e-4	Seq_AN.Glut_1
Rpn2	7.659254086284367e-9	0.5843716256800726	0.326	0.285	1.9212472950035707e-4	Seq_AN.Glut_1
Apcdd1	7.676116811410572e-9	1.8811994307466495	0.014	0.004	1.925477140974228e-4	Seq_AN.Glut_1
Vps28	7.95848516139366e-9	1.4640712259000228	0.023	0.01	1.9963064178839856e-4	Seq_AN.Glut_1
Tbc1d9b	8.147654696454008e-9	0.5584194901940435	0.316	0.272	2.0437577040585233e-4	Seq_AN.Glut_1
9330151L19Rik	8.470588783096303e-9	1.6832367647540147	0.016	0.005	2.1247624903518764e-4	Seq_AN.Glut_1
Cdc37l1	8.673788525457553e-9	0.44571030011741697	0.45	0.424	2.1757331137257726e-4	Seq_AN.Glut_1
Gm28447	8.730097452012357e-9	1.3113520776162062	0.023	0.009	2.1898576448627796e-4	Seq_AN.Glut_1
Lrrc1	9.202932095945122e-9	0.6086587005463187	0.136	0.097	2.3084634869468746e-4	Seq_AN.Glut_1
Nek5	9.43247705080629e-9	2.465922398973718	0.01	0.003	2.3660425434242498e-4	Seq_AN.Glut_1
Rmc1	9.590539038743922e-9	1.6339881445214326	0.017	0.006	2.4056908124785254e-4	Seq_AN.Glut_1
Rnf121	9.630552018476363e-9	0.6135288451375861	0.205	0.161	2.4157276683146108e-4	Seq_AN.Glut_1
Phactr3	9.644386385550319e-9	0.6451806100384666	0.336	0.303	2.4191978809514418e-4	Seq_AN.Glut_1
Kcnk9	1.020115831605507e-8	1.9882744219625268	0.018	0.007	2.558858551999254e-4	Seq_AN.Glut_1
Fam214a	1.0682438537960291e-8	0.6066012404012329	0.207	0.163	2.6795828828619597e-4	Seq_AN.Glut_1
Tsc22d4	1.1030663845135555e-8	0.753901	0.158	0.118	2.7669317189138025e-4	Seq_AN.Glut_1
Nfatc3	1.1072712344379153e-8	0.574448	0.183	0.139	2.777479164464067e-4	Seq_AN.Glut_1
Zkscan7	1.1169524061146192e-8	1.121259447788801	0.043	0.023	2.801763415497911e-4	Seq_AN.Glut_1
Pcnx	1.172689995858295e-8	0.5254629546554318	0.251	0.204	2.941575585610947e-4	Seq_AN.Glut_1
Npr3	1.1958452981382149e-8	1.24967	0.027	0.012	2.9996583458498984e-4	Seq_AN.Glut_1
Wdfy2	1.1965202701431102e-8	0.5934980222795815	0.161	0.12	3.0013514456269774e-4	Seq_AN.Glut_1
Gm11817	1.2002745825531352e-8	0.8903208044437867	0.096	0.064	3.010768762876284e-4	Seq_AN.Glut_1
Pappa	1.3146532886861386e-8	1.476152526674157	0.037	0.019	3.29767630934031e-4	Seq_AN.Glut_1
1700088E04Rik	1.3280582959600482e-8	0.621257	0.158	0.118	3.3313014295861847e-4	Seq_AN.Glut_1
Gm48259	1.3305656045046956e-8	1.8665941574209741	0.015	0.005	0.000333759	Seq_AN.Glut_1
1700085D07Rik	1.3738299088536729e-8	1.7470458972920504	0.015	0.005	3.446114943368553e-4	Seq_AN.Glut_1
Atp4a	1.4217182051113658e-8	1.4802759461406865	0.024	0.01	3.56623794570135e-4	Seq_AN.Glut_1
Gm43843	1.4944203676001418e-8	2.336501575522723	0.011	0.003	3.748604050088196e-4	Seq_AN.Glut_1
Nedd4	1.5023632898730972e-8	0.2733251808934214	0.672	0.659	3.768528076317677e-4	Seq_AN.Glut_1
Gpr179	1.584038412865965e-8	1.3697508239824345	0.028	0.013	3.973401954832987e-4	Seq_AN.Glut_1
Baiap2	1.6300368773700344e-8	0.5554008502922926	0.212	0.168	4.088784503194994e-4	Seq_AN.Glut_1
Traf4	1.6469376064382128e-8	1.7789756183869496	0.015	0.005	4.131178291989613e-4	Seq_AN.Glut_1
Gbf1	1.6650454507663353e-8	0.43392931803632806	0.435	0.408	4.1766000087022754e-4	Seq_AN.Glut_1
Armcx6	1.673491282394956e-8	0.9147357533022993	0.104	0.072	4.197785532759508e-4	Seq_AN.Glut_1
Gm48713	1.7512289900630917e-8	1.9706867332841043	0.01	0.003	4.392782798674259e-4	Seq_AN.Glut_1
Gm31356	1.821689731541102e-8	1.7013682715912264	0.017	0.006	4.5695265225977e-4	Seq_AN.Glut_1
Lrrfip1	1.860136429831363e-8	0.33666899554545404	0.49	0.458	4.6659662205889913e-4	Seq_AN.Glut_1
Tle1	1.929733177732438e-8	0.6575194300332838	0.138	0.1	4.8405427030240474e-4	Seq_AN.Glut_1
Spata6	1.9411882624147484e-8	0.8354377043303063	0.068	0.042	4.869276637441155e-4	Seq_AN.Glut_1
Fosl1	1.9933876628641915e-8	1.2130531704741911	0.031	0.015	5.000213613528538e-4	Seq_AN.Glut_1
Scx	2.0257926410477948e-8	1.5156880434821747	0.028	0.013	5.081498260804288e-4	Seq_AN.Glut_1
Gm38157	2.0496820444684608e-8	2.07425	0.011	0.003	5.141422440344687e-4	Seq_AN.Glut_1
Hhip	2.1151062222799267e-8	1.9020626608505036	0.017	0.006	5.305532447966968e-4	Seq_AN.Glut_1
Arhgap22	2.124951731579433e-8	1.013998049592018	0.057	0.034	5.33022892349385e-4	Seq_AN.Glut_1
Erp29	2.149661463460491e-8	1.0406073096898463	0.357	0.357	5.392210814944296e-4	Seq_AN.Glut_1
Pgm3	2.183054459209544e-8	0.6781608043054459	0.148	0.11	5.47597380548122e-4	Seq_AN.Glut_1
Lrch3	2.196371797337233e-8	0.3665300588938045	0.404	0.361	5.509379016440715e-4	Seq_AN.Glut_1
Gm28376	2.217951086851503e-8	0.9702384590899871	0.053	0.031	5.56350850625831e-4	Seq_AN.Glut_1
Rb1	2.3093764215435375e-8	0.4885141023787761	0.194	0.149	5.792839815799809e-4	Seq_AN.Glut_1
Piezo2	2.3242320199334454e-8	0.96193	0.06	0.035	5.830103598801054e-4	Seq_AN.Glut_1
Nup98	2.3285430222853926e-8	0.4907292572952383	0.241	0.196	5.840917317100679e-4	Seq_AN.Glut_1
Gm38126	2.3894106357968666e-8	2.046836599054007	0.012	0.004	5.99359763883286e-4	Seq_AN.Glut_1
Slc25a13	2.4059056464794806e-8	0.9315135679289472	0.074	0.047	6.034973723629129e-4	Seq_AN.Glut_1
Arhgap44	2.4604329047008547e-8	0.5223283870556528	0.332	0.294	6.171749898151624e-4	Seq_AN.Glut_1
Arid4b	2.5255999954214343e-8	0.22562063722775405	0.65	0.624	6.335215028515126e-4	Seq_AN.Glut_1
Usp34	2.5433268804494512e-8	0.25373735175979917	0.673	0.68	6.379681146919403e-4	Seq_AN.Glut_1
C130023A14Rik	2.5595887080213127e-8	1.9814421757398524	0.014	0.005	6.420472315200661e-4	Seq_AN.Glut_1
Wdpcp	2.7199302560629728e-8	0.6047714616838449	0.126	0.09	6.822673054308361e-4	Seq_AN.Glut_1
Gm28294	2.736494512842516e-8	0.9319573212526797	0.068	0.042	6.864222836014167e-4	Seq_AN.Glut_1
C130060K24Rik	2.794068402869506e-8	1.4329414851228153	0.049	0.028	7.008641181757869e-4	Seq_AN.Glut_1
Ccnl2	2.848311744827828e-8	0.39117298828043146	0.415	0.378	7.144705180726124e-4	Seq_AN.Glut_1
Tmem164	2.8590553245309775e-8	0.5249953969020098	0.164	0.123	7.171654376053504e-4	Seq_AN.Glut_1
2610020C07Rik	2.979956198503902e-8	0.7213950243579816	0.13	0.094	7.474922128327188e-4	Seq_AN.Glut_1
Dennd2a	2.9961392251393653e-08	0.8188493333392055	0.121	0.086	7.515515632339584e-4	Seq_AN.Glut_1
Cbfa2t2	3.067894359677657e-8	0.5105070558217216	0.259	0.214	7.695506211815435e-4	Seq_AN.Glut_1
Tor3a	3.283339343586999e-8	1.2026620434385937	0.037	0.019	8.235928409453628e-4	Seq_AN.Glut_1
D730044K07Rik	3.285819839864412e-8	1.7666702491127229	0.014	0.005	8.242150486315891e-4	Seq_AN.Glut_1
Egr1	3.286656350742483e-8	1.1355848921525487	0.137	0.102	8.244248790202444e-4	Seq_AN.Glut_1
Gm42508	3.323246389553528e-8	1.612957120225091	0.021	0.009	8.336031243556069e-4	Seq_AN.Glut_1
4930532I03Rik	3.342899310785829e-8	0.8628617777443828	0.102	0.07	8.385328631175174e-4	Seq_AN.Glut_1
Rock1	3.686880309317153e-8	0.27189550433260545	0.5	0.463	9.248170567891146e-4	Seq_AN.Glut_1
Frmd4a	3.6945691238755794e-8	0.22435769776355352	0.607	0.571	9.267457190329503e-4	Seq_AN.Glut_1
Txnrd3	3.7779644251282836e-8	1.1416699092083014	0.071	0.045	9.476645963991787e-4	Seq_AN.Glut_1
Tmem165	3.8871583094378054e-8	0.5894165338268337	0.199	0.159	9.750547903393791e-4	Seq_AN.Glut_1
Rptor	4.046864270682636e-8	0.5006183710966982	0.262	0.218	0.00101512	Seq_AN.Glut_1
Mapkapk2	4.052954114605189e-8	0.8354868736857459	0.064	0.039	0.00101664	Seq_AN.Glut_1
Tmcc1	4.197687414775153e-8	0.3542674585470328	0.44	0.405	0.00105295	Seq_AN.Glut_1
Aff2	4.2020263381461754e-8	0.4071928703508028	0.342	0.296	0.00105404	Seq_AN.Glut_1
Tnfrsf1b	4.219070186412823e-8	1.3757376135149748	0.017	0.007	0.00105831	Seq_AN.Glut_1
Birc6	4.247371181377945e-8	0.3229844206226813	0.494	0.47	0.00106541	Seq_AN.Glut_1
Macroh2a2	4.371637039860924e-8	1.7309213340499667	0.014	0.005	0.00109658	Seq_AN.Glut_1
P3h4	4.398057334415012e-8	0.8775740020190417	0.122	0.088	0.00110321	Seq_AN.Glut_1
Cebpb	4.4216055337332285e-8	2.20745	0.015	0.005	0.00110912	Seq_AN.Glut_1
Fam13c	4.439304403010872e-8	0.5557189568667801	0.302	0.262	0.00111356	Seq_AN.Glut_1
Tert	4.5434867608692325e-8	0.7688516197106852	0.085	0.056	0.00113969	Seq_AN.Glut_1
Ccdc157	4.585191225929553e-8	0.8034044106540887	0.11	0.077	0.00115015	Seq_AN.Glut_1
Gm13525	4.59277226369312e-8	1.8348258746945367	0.015	0.005	0.00115205	Seq_AN.Glut_1
Hivep3	4.6670536181073005e-8	0.43869835505038185	0.336	0.293	0.00117068	Seq_AN.Glut_1
Rnf2	4.7637633221071905e-8	0.7126767994954428	0.132	0.097	0.00119494	Seq_AN.Glut_1
Gm14167	4.786171733947224e-8	1.2991368067247957	0.027	0.012	0.00120056	Seq_AN.Glut_1
Gm43648	4.9676517045104475e-8	1.579542901550263	0.016	0.006	0.00124609	Seq_AN.Glut_1
Mks1	5.004344961591562e-8	0.7924268279438285	0.068	0.043	0.00125529	Seq_AN.Glut_1
4930599N23Rik	5.228942931666931e-8	0.9547978680401898	0.088	0.059	0.00131163	Seq_AN.Glut_1
Rasgrp4	5.237679598063494e-8	1.9352568059621582	0.013	0.004	0.00131382	Seq_AN.Glut_1
Slc39a14	5.460204496039928e-8	0.8656088673999052	0.103	0.072	0.00136964	Seq_AN.Glut_1
Gm13912	5.482433962276772e-8	1.5022461251140822	0.01	0.003	0.00137521	Seq_AN.Glut_1
Gm31645	5.7435989979370164e-8	2.2247124263864553	0.011	0.003	0.00144072	Seq_AN.Glut_1
Peg10	5.772694596481451e-8	0.4644612902400789	0.215	0.17	0.00144802	Seq_AN.Glut_1
Usp32	5.878808499982383e-8	0.404442	0.398	0.361	0.00147464	Seq_AN.Glut_1
Col18a1	5.906426685826736e-8	0.7737754401247974	0.069	0.043	0.00148157	Seq_AN.Glut_1
Tcf3	6.055007633526278e-8	0.8458124917842602	0.101	0.07	0.00151884	Seq_AN.Glut_1
4930483P17Rik	6.072274403967164e-8	1.4945739087659744	0.021	0.009	0.00152317	Seq_AN.Glut_1
H2aj	6.206114270281361e-8	1.805308863689464	0.011	0.003	0.00155674	Seq_AN.Glut_1
Tcf12	6.236044778389517e-8	0.3426711782540909	0.356	0.309	0.00156425	Seq_AN.Glut_1
Efna5	6.55930293647841e-8	0.41353468937613835	0.367	0.325	0.00164534	Seq_AN.Glut_1
Frmd6	6.594169842224887e-8	1.109958222129708	0.074	0.048	0.00165408	Seq_AN.Glut_1
Apba1	6.656623746252442e-8	0.33382671143076026	0.392	0.348	0.00166975	Seq_AN.Glut_1
Bbs9	7.036376626261343e-8	0.45063071121437204	0.256	0.211	0.001765	Seq_AN.Glut_1
Dynlt1c	7.06782836084258e-8	0.8911306494528923	0.08	0.052	0.00177289	Seq_AN.Glut_1
Mt1	7.106421933058543e-8	1.3099764265816676	0.036	0.019	0.00178257	Seq_AN.Glut_1
Gm42616	7.469594672427543e-8	1.9986365940928295	0.012	0.004	0.00187367	Seq_AN.Glut_1
Gng12	7.647283117692927e-8	1.0693774922768489	0.055	0.033	0.00191824	Seq_AN.Glut_1
Tpk1	7.647286223053929e-8	0.6430576137372221	0.111	0.078	0.00191825	Seq_AN.Glut_1
Gm42482	7.822843582324406e-8	2.1527177487734104	0.01	0.003	0.00196228	Seq_AN.Glut_1
Itch	8.311165912048304e-8	0.41041139572896324	0.386	0.348	0.00208477	Seq_AN.Glut_1
Ptch1	8.3404178820515e-8	0.6416157309441013	0.094	0.063	0.00209211	Seq_AN.Glut_1
Kansl1l	8.542587364512229e-8	0.39450216214613254	0.311	0.262	0.00214282	Seq_AN.Glut_1
Gm26749	8.646857601812393e-8	0.7285393955033521	0.108	0.076	0.00216898	Seq_AN.Glut_1
AC162938.2	8.818795014604e-8	1.6357508539802406	0.021	0.009	0.00221211	Seq_AN.Glut_1
Mcph1	9.273418123008367e-8	0.5402500469598179	0.221	0.179	0.00232614	Seq_AN.Glut_1
Golgb1	9.409248716795454e-8	0.3307477162596406	0.711	0.706	0.00236022	Seq_AN.Glut_1
Otof	9.770313580372317e-8	0.6656417564984369	0.138	0.102	0.00245079	Seq_AN.Glut_1
Dgki	9.892232676326684e-8	0.2708482506976444	0.395	0.344	0.00248137	Seq_AN.Glut_1
Iqsec3	9.905040956549156e-8	0.503968	0.241	0.198	0.00248458	Seq_AN.Glut_1
Gm28750	9.961393485626706e-8	0.7607802014149934	0.091	0.061	0.00249872	Seq_AN.Glut_1
Arpc1b	1.0260732784527024e-7	0.9971589100141292	0.054	0.032	0.0025738	Seq_AN.Glut_1
Suclg2	1.0339841492134442e-7	1.0136156529258864	0.044	0.024	0.00259365	Seq_AN.Glut_1
Tac1	1.0505231657386973e-7	0.25178546677308655	0.073	0.046	0.00263513	Seq_AN.Glut_1
Smyd3	1.054895039553168e-7	0.3264750928446245	0.387	0.342	0.0026461	Seq_AN.Glut_1
Lcp1	1.0782261291391069e-7	1.8264403362039507	0.016	0.006	0.00270462	Seq_AN.Glut_1
D130007C19Rik	1.0841254163760931e-7	2.0138162847185725	0.012	0.004	0.00271942	Seq_AN.Glut_1
Gm31907	1.2025413486572188e-7	2.1643565938943494	0.013	0.004	0.00301645	Seq_AN.Glut_1
H2-Q4	1.203553340175488e-7	1.7448186475773806	0.011	0.004	0.00301899	Seq_AN.Glut_1
2210408I21Rik	1.2348907562465036e-7	0.4269282765431737	0.349	0.31	0.0030976	Seq_AN.Glut_1
Tmod1	1.2519231274343798e-7	0.8436071755578509	0.064	0.04	0.00314032	Seq_AN.Glut_1
Fam222b	1.2638271340966562e-7	0.5076472892415996	0.249	0.208	0.00317018	Seq_AN.Glut_1
Rfx2	1.264814562492261e-7	1.0239285364719288	0.044	0.025	0.00317266	Seq_AN.Glut_1
Usp24	1.269606381601474e-7	0.43433537444340387	0.211	0.169	0.00318468	Seq_AN.Glut_1
Supt3	1.288855941799764e-7	0.5087185183353861	0.249	0.207	0.00323297	Seq_AN.Glut_1
Jph1	1.3416219648575942e-7	0.8910985960368909	0.047	0.027	0.00336532	Seq_AN.Glut_1
Igfbpl1	1.3504210847369626e-7	1.3799189169035602	0.033	0.017	0.0033874	Seq_AN.Glut_1
Thsd7a	1.3519558660990493e-7	0.45785079751076047	0.257	0.212	0.00339125	Seq_AN.Glut_1
Dip2b	1.3562018195208855e-7	0.4044310854917948	0.325	0.286	0.0034019	Seq_AN.Glut_1
4833422C13Rik	1.369295222069333e-7	0.9079744817763267	0.104	0.073	0.00343474	Seq_AN.Glut_1
Anxa5	1.3807947740431933e-7	0.7637005454556348	0.152	0.118	0.00346359	Seq_AN.Glut_1
Unc5b	1.4044159913484337e-7	1.3347164236867552	0.034	0.018	0.00352284	Seq_AN.Glut_1
6330415B21Rik	1.4057835843960865e-7	1.4637918074436609	0.02	0.008	0.00352627	Seq_AN.Glut_1
Anapc4	1.4135430237445423e-7	0.47853605923575204	0.325	0.288	0.00354573	Seq_AN.Glut_1
Neto1	1.4270792508102786e-7	0.5869324476875459	0.203	0.162	0.00357969	Seq_AN.Glut_1
Kdm4c	1.4284074059323632e-7	0.35810351663729906	0.324	0.278	0.00358302	Seq_AN.Glut_1
Chic1	1.4427702944090105e-7	0.4036203671911735	0.383	0.347	0.00361905	Seq_AN.Glut_1
Mfap2	1.4519973595418107e-7	0.7504401900336535	0.103	0.072	0.00364219	Seq_AN.Glut_1
Ndfip1	1.4667018840338864e-7	0.4581815519654471	0.511	0.511	0.00367908	Seq_AN.Glut_1
Apod	1.472691248064025e-7	1.2273356734024201	0.014	0.005	0.0036941	Seq_AN.Glut_1
Scfd1	1.5597466484044593e-7	0.446231	0.402	0.373	0.00391247	Seq_AN.Glut_1
Pkn2	1.5799023739371549e-7	0.4005128801391343	0.313	0.269	0.00396303	Seq_AN.Glut_1
Clcn5	1.6328650357711303e-7	0.6033767851875662	0.201	0.161	0.00409588	Seq_AN.Glut_1
Ube2d-ps	1.6609988654528015e-7	1.7300225072338717	0.013	0.005	0.00416645	Seq_AN.Glut_1
Slc16a2	1.662174515001635e-7	0.7978875456264973	0.202	0.168	0.0041694	Seq_AN.Glut_1
Dgkz	1.6633013612902204e-7	0.4421145279624008	0.243	0.199	0.00417223	Seq_AN.Glut_1
P2rx4	1.717588399650563e-7	0.6100961807246196	0.143	0.107	0.0043084	Seq_AN.Glut_1
Mgat4b	1.7240230626147863e-7	0.6849779151888243	0.148	0.111	0.00432454	Seq_AN.Glut_1
Grb10	1.7267954745599408e-7	0.2969777889343934	0.534	0.515	0.00433149	Seq_AN.Glut_1
Plk2	1.7671107669831322e-7	0.8468223461930041	0.132	0.099	0.00443262	Seq_AN.Glut_1
Gm44518	1.8143721103825046e-7	1.8364201191328409	0.012	0.004	0.00455117	Seq_AN.Glut_1
Gm45537	1.8457828841168034e-7	2.0932159883425543	0.01	0.003	0.00462996	Seq_AN.Glut_1
Gm16701	1.9087855376284665e-7	1.554115984399647	0.035	0.019	0.004788	Seq_AN.Glut_1
Gm39326	1.9156436232537757e-7	1.4302726578963174	0.017	0.007	0.0048052	Seq_AN.Glut_1
Gm28305	1.9199804982555695e-7	0.8434343512519398	0.08	0.053	0.00481608	Seq_AN.Glut_1
Paxbp1	1.929262552132635e-7	0.5027165360615555	0.296	0.257	0.00483936	Seq_AN.Glut_1
Gramd3	1.9525370672623853e-7	1.414513342481806	0.011	0.004	0.00489774	Seq_AN.Glut_1
Micu1	1.9951064301141887e-7	0.5484159413542339	0.268	0.231	0.00500452	Seq_AN.Glut_1
Efnb3	2.0165545313987803e-7	0.7779536937735935	0.234	0.201	0.00505833	Seq_AN.Glut_1
Ap1s3	2.027053633602701e-7	1.184999200249523	0.045	0.026	0.00508466	Seq_AN.Glut_1
Psme4	2.0387282100499421e-07	0.3955123931098036	0.384	0.343	0.00511395	Seq_AN.Glut_1
Echdc2	2.0945297101463275e-7	0.8342918526727261	0.042	0.023	0.00525392	Seq_AN.Glut_1
Zfas1	2.1184220765682496e-7	0.6783752077198167	0.258	0.223	0.00531385	Seq_AN.Glut_1
Celf3	2.123183609491828e-7	0.3931289109380472	0.319	0.278	0.00532579	Seq_AN.Glut_1
Gm19817	2.1437850999067683e-7	1.5745841115824728	0.014	0.005	0.00537747	Seq_AN.Glut_1
Map4k3	2.1494566229485907e-7	0.5187967582648797	0.277	0.237	0.0053917	Seq_AN.Glut_1
Strn3	2.1523997962956096e-7	0.35771517179943424	0.501	0.493	0.00539908	Seq_AN.Glut_1
Gm28905	2.166231787116686e-7	0.45131607067715995	0.308	0.266	0.00543378	Seq_AN.Glut_1
Heatr6	2.267941898403435e-7	0.43039668738719106	0.247	0.205	0.00568891	Seq_AN.Glut_1
Gm16283	2.3099994952760908e-7	1.4704080528510621	0.02	0.009	0.0057944	Seq_AN.Glut_1
9330162012Rik	2.3780409241415003e-7	1.8632950097839647	0.015	0.006	0.00596508	Seq_AN.Glut_1
Dcc	2.4445413926400103e-7	0.3857012207083712	0.519	0.496	0.00613189	Seq_AN.Glut_1
Gm9645	2.5194007300079247e-7	1.6353645915430048	0.017	0.007	0.00631966	Seq_AN.Glut_1
Gm37035	2.5550018547965614e-7	1.2138657996584428	0.02	0.008	0.00640897	Seq_AN.Glut_1
Phf3	2.556473369506659e-7	0.324883	0.431	0.393	0.00641266	Seq_AN.Glut_1
Rel	2.6749976223392283e-7	1.110657116073262	0.039	0.021	0.00670996	Seq_AN.Glut_1
Ptprj	2.6835175424129084e-7	0.5816447410053855	0.248	0.21	0.00673134	Seq_AN.Glut_1
4933424G05Rik	2.7831062397199486e-7	1.9102106846331512	0.013	0.005	0.00698114	Seq_AN.Glut_1
Morn2	2.944984171330158e-7	0.6226731757020716	0.17	0.134	0.0073872	Seq_AN.Glut_1
Dnmbp	3.012866137449484e-7	0.7218127975478741	0.101	0.071	0.00755747	Seq_AN.Glut_1
Atp9b	3.1134151416003774e-7	0.38415954477582337	0.343	0.304	0.00780969	Seq_AN.Glut_1
Arid1b	3.11850548735555e-7	0.47003504480412495	0.281	0.242	0.00782246	Seq_AN.Glut_1
Mlip	3.1544711346272303e-7	1.1445286548297955	0.052	0.031	0.00791268	Seq_AN.Glut_1
Gm16168	3.304936378736203e-7	1.1118507105516908	0.063	0.04	0.0082901	Seq_AN.Glut_1
Gm47479	3.3873162146168496e-7	2.1366412172941187	0.011	0.004	0.00849674	Seq_AN.Glut_1
Zfp229	3.4034896758187104e-7	1.1086031508946954	0.045	0.026	0.00853731	Seq_AN.Glut_1
Ikbip	3.5963845398261667e-07	0.7578502661990478	0.133	0.101	0.00902117	Seq_AN.Glut_1
Fnip2	3.611828457638714e-7	0.6016225082678198	0.154	0.118	0.00905991	Seq_AN.Glut_1
4833412C15Rik	3.6670379491685125e-7	2.013107129373002	0.01	0.003	0.0091984	Seq_AN.Glut_1
Ptpn1	3.7000113106658185e-7	0.49157800669321905	0.22	0.181	0.00928111	Seq_AN.Glut_1
Camk2g	3.8090468655157423e-7	0.3862190498948598	0.428	0.395	0.00955461	Seq_AN.Glut_1
Gm42946	3.8137049672437467e-7	1.2848747720845237	0.018	0.007	0.0095663	Seq_AN.Glut_1
Sst	0	6.967603392060977	0.634	0.051	0	Seq_AN.Glut_2
Masp1	0	4.707510763897522	0.422	0.025	0	Seq_AN.Glut_2
Prdm8	0	4.243382475703433	0.294	0.02	0	Seq_AN.Glut_2
Col12a1	0	5.353177682796014	0.272	0.01	0	Seq_AN.Glut_2
Rxfp2	0	5.101021036962175	0.198	0.009	0	Seq_AN.Glut_2
Stat5a	1.0039322408883822e-273	4.503157495293756	0.183	0.009	2.5182636330444178e-269	Seq_AN.Glut_2
Hhip	1.2935476704164569e-256	5.072986123908804	0.134	0.005	3.2447349764726403e-252	Seq_AN.Glut_2
Pkib	7.950921121201628e-253	3.0722728088132167	0.704	0.172	1.9944090540422162e-248	Seq_AN.Glut_2
Ghr	9.151414200073474e-223	2.9870842671597004	0.767	0.223	2.2955407379464305e-218	Seq_AN.Glut_2
Stk26	9.926379561633897e-207	3.2997057298083265	0.362	0.05	2.489933049240247e-202	Seq_AN.Glut_2
Angpt1	1.5022486541162033e-172	2.6977440674855533	0.521	0.117	3.7682405239850845e-168	Seq_AN.Glut_2
Zeb2	3.7665094201632064e-168	2.7108229476377654	0.42	0.077	9.447912229537387e-164	Seq_AN.Glut_2
Otp	2.2487661412434486e-134	2.563868569596006	0.393	0.082	5.640804988695066e-130	Seq_AN.Glut_2
Cartpt	2.9719950306292796e-128	2.166077225179078	0.302	0.052	7.4549523348304845e-124	Seq_AN.Glut_2
Ptbp3	1.930378427592625e-125	2.3379130827029115	0.496	0.134	4.84216124777334e-121	Seq_AN.Glut_2
Trpm3	1.0651098553303823e-110	2.3534273803525076	0.712	0.301	2.671721561110731e-106	Seq_AN.Glut_2
Agtr1a	2.3011930077758623e-110	2.6093209471922827	0.202	0.027	5.772312540704973e-106	Seq_AN.Glut_2
Ptprk	8.265221963558232e-105	2.1209004881310087	0.588	0.207	2.073248277338947e-100	Seq_AN.Glut_2
Necab1	2.3938946444442342e-104	1.7173671735529847	0.683	0.266	6.004845326123917e-100	Seq_AN.Glut_2
Nnat	3.843064489907078e-104	1.5547931282067227	0.84	0.487	9.639942966482915e-100	Seq_AN.Glut_2
Tmem255a	5.3369867177013e-97	2.027138419940761	0.665	0.304	1.338729748268194e-92	Seq_AN.Glut_2
Sfrp2	8.999317084566542e-97	4.009112141635826	0.163	0.021	2.2573886974926713e-92	Seq_AN.Glut_2
4930467D21Rik	2.2010582671667936e-92	3.8929177339058296	0.126	0.013	5.521134557361185e-88	Seq_AN.Glut_2
St8sia4	4.475970498601163e-92	2.3901536532980217	0.389	0.108	1.1227524398691158e-87	Seq_AN.Glut_2
Ramp1	3.0735403136200605e-90	2.7866154926765425	0.148	0.018	7.709668522684559e-86	Seq_AN.Glut_2
Antxr2	5.30702716620296e-82	3.6815736637172476	0.103	0.01	1.3312146943703505e-77	Seq_AN.Glut_2
Galr1	2.3822347091349555e-81	2.9476772626265597	0.226	0.045	5.9755975443941226e-77	Seq_AN.Glut_2
Col23a1	6.828575094304289e-81	2.8739094570854515	0.193	0.033	1.7128797766552878e-76	Seq_AN.Glut_2
Nhlh2	2.3597413636896432e-74	2.469283088791721	0.257	0.059	5.919175236679101e-70	Seq_AN.Glut_2
Naa11	1.992203982112277e-73	4.5844098187382745	0.056	0.003	4.997244468730436e-69	Seq_AN.Glut_2
Sim1	7.623909484357084e-73	1.6250250567568822	0.451	0.152	1.912381455056131e-68	Seq_AN.Glut_2
Stat5b	1.149660029989451e-72	2.0022304817266305	0.492	0.192	2.8838072192255388e-68	Seq_AN.Glut_2
Csgalnact1	2.748734247140359e-71	2.2914322560762406	0.319	0.089	6.894924985526876e-67	Seq_AN.Glut_2
Socs3	6.22346529677186e-71	4.904191582215105	0.041	0.002	1.5610940350422534e-66	Seq_AN.Glut_2
Fstl4	1.2700026996135874e-67	1.8985058541423758	0.527	0.225	3.1856747717107225e-63	Seq_AN.Glut_2
B4galnt3	2.187463216379854e-67	4.798627478179664	0.058	0.004	5.487032731967226e-63	Seq_AN.Glut_2
Msn	1.3226775186942403e-63	3.482036227814259	0.095	0.011	3.3178042878926324e-59	Seq_AN.Glut_2
St6galnac5	3.6290273124684545e-62	2.048963943906622	0.475	0.204	9.103052110595872e-58	Seq_AN.Glut_2
Slit2	9.474396389962619e-62	1.445315854905194	0.591	0.274	2.3765575904582233e-57	Seq_AN.Glut_2
Pdlim5	6.087331764992392e-60	2.3557811688587695	0.255	0.069	1.5269462999306915e-55	Seq_AN.Glut_2
Fam46a	1.6979405045114318e-59	2.0808570821631065	0.294	0.086	4.2591139615164754e-55	Seq_AN.Glut_2
Pex5l	4.216576532744117e-59	1.7550009151552735	0.551	0.264	1.0576860574735342e-54	Seq_AN.Glut_2
Ifi35	5.7023639459347616e-55	3.3581504294482816	0.095	0.012	1.4303809721982757e-50	Seq_AN.Glut_2
Kcnh8	1.2135741659647092e-54	2.085987656363103	0.27	0.078	3.0441294379058764e-50	Seq_AN.Glut_2
Id4	6.002302575747925e-54	2.077332367188672	0.401	0.166	1.5056175781006094e-49	Seq_AN.Glut_2
Nos1	6.426642754362816e-53	1.8804844049010419	0.325	0.109	1.6120590685043687e-48	Seq_AN.Glut_2
Cadps2	9.11215277905991e-53	1.5627535421813903	0.498	0.223	2.2856924030993876e-48	Seq_AN.Glut_2
Sema5a	9.773575637431783e-52	1.6335806038423413	0.442	0.189	2.4516037128933883e-47	Seq_AN.Glut_2
Hs6st3	2.3223672346837682e-51	1.9172050743233042	0.535	0.269	5.825425971480764e-47	Seq_AN.Glut_2
Dlk1	5.2148664158922243e-51	1.2885600024063566	0.545	0.252	1.3080970917624055e-46	Seq_AN.Glut_2
1700011I03Rik	9.263470496488605e-50	3.362251757698099	0.08	0.01	2.3236489393392018e-45	Seq_AN.Glut_2
Tle4	3.74299301967382e-49	1.5018703009762688	0.471	0.216	9.388923690549811e-45	Seq_AN.Glut_2
Ptchd4	6.866880645134193e-49	1.9363982923602137	0.422	0.182	1.722488341025461e-44	Seq_AN.Glut_2
Col25a1	9.733394922142156e-49	1.429054104017411	0.51	0.238	2.441524782270138e-44	Seq_AN.Glut_2
Vgll3	1.5959019406784473e-48	3.4734739825611682	0.103	0.016	4.003160427997817e-44	Seq_AN.Glut_2
Cd63	2.597737712888784e-47	1.9166309110420883	0.278	0.09	6.516165279010226e-43	Seq_AN.Glut_2
Fezf1	1.4663420455308754e-46	2.4742608071078136	0.095	0.014	3.678172387009648e-42	Seq_AN.Glut_2
A830018L16Rik	2.649739618310059e-44	1.6980148361848613	0.535	0.283	6.646606858568952e-40	Seq_AN.Glut_2
Edn3	3.9904856769335795e-44	4.719224417522746	0.033	0.002	1.0009734272020191e-39	Seq_AN.Glut_2
Epb41l4a	1.0234018960937213e-43	1.864266910577577	0.257	0.083	2.5671013161614905e-39	Seq_AN.Glut_2
Gpr101	1.5832671484739706e-43	2.162082576786696	0.305	0.112	3.971467315232108e-39	Seq_AN.Glut_2
Zbtb20	6.217846731856482e-43	1.085065360468914	0.805	0.596	1.55968467421888e-38	Seq_AN.Glut_2
Nr3c1	7.154590416546687e-43	1.3702100820753997	0.543	0.297	1.794657460086571e-38	Seq_AN.Glut_2
Tekt1	2.1682973393626556e-42	2.1893613772534652	0.175	0.045	5.438957046057285e-38	Seq_AN.Glut_2
4933409G03Rik	3.6478306342896675e-42	7.181472578119894	0.01	0	9.150218363052202e-38	Seq_AN.Glut_2
Pam	4.114115761686003e-42	0.9038825767971574	0.846	0.642	1.031984797661317e-37	Seq_AN.Glut_2
Ncam2	8.07256867048849e-42	1.0500684996793503	0.829	0.61	2.0249231253053327e-37	Seq_AN.Glut_2
Spag16	1.4534456363849173e-41	2.1551048443433514	0.198	0.055	3.6458230343079265e-37	Seq_AN.Glut_2
Pcdh19	3.224908505718601e-41	1.5842059021780839	0.463	0.234	8.08936049574454e-37	Seq_AN.Glut_2
Npy1r	4.254578571228767e-41	2.056324258896077	0.21	0.062	1.067218488807024e-36	Seq_AN.Glut_2
Serpinf1	4.3149263906895317e-41	2.5426559201156578	0.13	0.027	1.082356135840562e-36	Seq_AN.Glut_2
Kcnip1	1.038834119198329e-40	1.3550397944468964	0.652	0.41	2.6058115045970886e-36	Seq_AN.Glut_2
Tnfrsf11b	2.3995816795233415e-40	4.101774689764534	0.035	0.002	6.01911068491635e-36	Seq_AN.Glut_2
Pcsk1	2.4217469421415172e-40	1.8367743157202134	0.325	0.127	6.074710029667782e-36	Seq_AN.Glut_2
Mill2	2.6284180653216295e-40	2.6634349840691542	0.08	0.012	6.593123875052775e-36	Seq_AN.Glut_2
Kcnv1	1.3036780416661392e-38	2.511556952470017	0.113	0.023	3.2701459997153435e-34	Seq_AN.Glut_2
Uncx	5.950501586125286e-38	1.7778251403078076	0.179	0.049	1.4926238178636668e-33	Seq_AN.Glut_2
Sorcs1	6.463958595939344e-38	1.5089400832684576	0.593	0.352	1.621419374205425e-33	Seq_AN.Glut_2
Elmo1	1.7976298865163678e-35	1.4485643387300127	0.582	0.367	4.509174807337657e-31	Seq_AN.Glut_2
Atp1a1	4.499990023001415e-35	1.800703803380304	0.403	0.205	1.128777497369675e-30	Seq_AN.Glut_2
Plppr4	9.042412051533399e-35	1.2601525390403818	0.609	0.413	2.2681986390066376e-30	Seq_AN.Glut_2
Adam23	2.0539280877260667e-34	1.1234104466585821	0.642	0.424	5.152073215252066e-30	Seq_AN.Glut_2
Lhx5	2.8192647603832924e-34	1.9429340639670472	0.171	0.049	7.071843724945451e-30	Seq_AN.Glut_2
Tead1	5.611884164621112e-34	1.2889418711749143	0.379	0.172	1.4076850238535597e-29	Seq_AN.Glut_2
Eya4	1.2841001065064196e-33	3.4036281935410524	0.058	0.008	3.221036707160703e-29	Seq_AN.Glut_2
Adgrl2	3.050989114978881e-33	1.2127904322501506	0.506	0.283	7.653101096013025e-29	Seq_AN.Glut_2
Krt90	5.616195085741707e-33	3.197747230147853	0.058	0.008	1.4087663753074498e-28	Seq_AN.Glut_2
Resp18	8.975730579642533e-33	1.56929	0.66	0.588	2.251472258597533e-28	Seq_AN.Glut_2
Ptchd1	2.868132376566978e-32	1.4581969474955856	0.323	0.142	7.194423253380607e-28	Seq_AN.Glut_2
Necab2	1.201258014820696e-31	1.6183956436490836	0.241	0.089	3.0132356043762338e-27	Seq_AN.Glut_2
Nrp1	1.5793505081368966e-31	1.2352269097750326	0.412	0.203	3.961642814610592e-27	Seq_AN.Glut_2
Mamld1	2.2223917925887575e-31	1.6112669966071762	0.296	0.125	5.5746475725296395e-27	Seq_AN.Glut_2
Alk	3.698515135936429e-31	1.5331062773767714	0.383	0.189	9.277355366982938e-27	Seq_AN.Glut_2
Grid1	3.940510871525001e-30	1.3220907582796957	0.586	0.367	9.884377470133313e-26	Seq_AN.Glut_2
Pbx3	5.132551375515274e-30	1.548447606454677	0.286	0.118	1.2874491870342513e-25	Seq_AN.Glut_2
Pth2r	2.6912829624183336e-29	2.599256885167721	0.088	0.018	6.7508141829301485e-25	Seq_AN.Glut_2
Gm26771	3.19969436538826e-29	2.142455974393367	0.109	0.026	8.026113346139911e-25	Seq_AN.Glut_2
Galnt16	3.972682560767156e-29	1.1334990475053857	0.504	0.296	9.965076935428335e-25	Seq_AN.Glut_2
Gm42557	6.226057877289882e-29	3.722853666918898	0.029	0.002	1.561744357939394e-24	Seq_AN.Glut_2
Spink8	6.542376720398261e-29	2.3339503024906167	0.078	0.015	1.6410897765446998e-24	Seq_AN.Glut_2
Vwa5a	6.661643078515311e-29	2.1085102261746442	0.101	0.023	1.6710065498147806e-24	Seq_AN.Glut_2
Rit2	1.1391504390714372e-28	0.7947627337528178	0.739	0.598	2.8574449613667933e-24	Seq_AN.Glut_2
Arid5b	1.3250814484414745e-28	1.0413778974504713	0.556	0.346	3.3238343052705944e-24	Seq_AN.Glut_2
Blcap	7.137468632284398e-28	1.1632915560329302	0.545	0.359	1.7903626317222183e-23	Seq_AN.Glut_2
Gm37459	7.4827577665923895e-28	1.8710916730565423	0.181	0.061	1.876974958172035e-23	Seq_AN.Glut_2
Gm44148	7.744779607422289e-28	2.2730531715581863	0.109	0.027	1.942700516725807e-23	Seq_AN.Glut_2
Pld5	9.975159558931173e-28	1.2279638057432298	0.397	0.203	2.5021690237622954e-23	Seq_AN.Glut_2
Socs1	1.617574973065128e-27	2.9842188412502417	0.064	0.011	4.057525062436567e-23	Seq_AN.Glut_2
Gm27199	2.9824835586431668e-27	1.754028847114633	0.15	0.046	7.48126175850052e-23	Seq_AN.Glut_2
Rgs4	3.123969695225965e-27	1.3012800083618088	0.366	0.185	7.836165583504811e-23	Seq_AN.Glut_2
Eif2ak2	1.0085525089046903e-26	2.210268072337711	0.111	0.029	2.529853113336525e-22	Seq_AN.Glut_2
Gm27151	1.902314102883092e-26	2.282109110618717	0.113	0.03	4.771764695671948e-22	Seq_AN.Glut_2
Echdc3	3.0600856293937073e-26	3.0582746630886857	0.041	0.005	7.675918792771175e-22	Seq_AN.Glut_2
Celf6	3.8073527439023884e-26	1.0625358560576568	0.531	0.344	9.550363622804751e-22	Seq_AN.Glut_2
Cst3	8.016077592982408e-26	1.6190874042284689	0.477	0.357	2.0107529034237073e-21	Seq_AN.Glut_2
Adamtsl3	1.3040234101068494e-25	2.668939844342922	0.072	0.014	3.2710123219120212e-21	Seq_AN.Glut_2
Bcl6	1.6031199308436887e-25	1.8443086560906508	0.117	0.032	4.021266034528309e-21	Seq_AN.Glut_2
Ap1s2	1.7634035701148966e-25	1.1045281588824696	0.502	0.306	4.4233215152762064e-21	Seq_AN.Glut_2
Gm45338	1.972765993718879e-25	5.15264	0.012	0	4.948486218644436e-21	Seq_AN.Glut_2
Akap7	4.567017044660202e-25	1.2727053238810102	0.391	0.215	1.145590555482565e-20	Seq_AN.Glut_2
Zeb2os	4.6094861308591355e-25	2.9105888069670485	0.029	0.003	1.1562435010647055e-20	Seq_AN.Glut_2
Rtp4	5.910944567259548e-25	3.189705205717015	0.058	0.01	1.482701335251385e-20	Seq_AN.Glut_2
Bhlhe22	8.229420269788256e-25	2.4477374007568797	0.07	0.014	2.064267780473686e-20	Seq_AN.Glut_2
Scg2	9.496290033344837e-25	1.5437699623366345	0.665	0.578	2.3820493919642188e-20	Seq_AN.Glut_2
Sorcs3	2.045364493324643e-24	0.9842708617385145	0.502	0.31	5.130592295055534e-20	Seq_AN.Glut_2
Btg1	2.082923275058438e-23	1.906794661783415	0.163	0.057	5.224804743156585e-19	Seq_AN.Glut_2
Cdh4	2.876005293750257e-23	1.2550356699697929	0.44	0.265	7.214171678843145e-19	Seq_AN.Glut_2
Chl1	3.2430338307057105e-23	0.8024094729056086	0.675	0.517	8.134826060942205e-19	Seq_AN.Glut_2
As3mt	7.376629624530896e-23	1.290949189892856	0.237	0.102	1.85035377501733e-18	Seq_AN.Glut_2
Lrrc43	1.4876094621681024e-22	2.2721157585759846	0.101	0.027	3.731519574902468e-18	Seq_AN.Glut_2
Gsn	1.7743481119045308e-22	2.8861237537388744	0.041	0.006	4.450774803901325e-18	Seq_AN.Glut_2
Cntnap5b	1.8165758528991156e-22	1.0953779708736027	0.512	0.317	4.556698869412142e-18	Seq_AN.Glut_2
Tmtc2	1.8356143788361545e-22	1.489581589189254	0.387	0.218	4.6044551078726104e-18	Seq_AN.Glut_2
Ifi203	2.9155391612908792e-22	3.726310225355874	0.019	0.001	7.313338432182041e-18	Seq_AN.Glut_2
Fam183b	4.986008243580586e-22	1.3845497376383487	0.204	0.082	1.2506903078197542e-17	Seq_AN.Glut_2
Nrn1l	5.825234156250207e-22	2.80811	0.06	0.012	1.4612017357538018e-17	Seq_AN.Glut_2
Rhoc	1.0292402823929291e-21	2.7832924136807176	0.037	0.005	2.5817463243544233e-17	Seq_AN.Glut_2
A730017C20Rik	1.822467766331248e-21	0.9653879802508356	0.566	0.406	4.5714781450653023e-17	Seq_AN.Glut_2
9330158H04Rik	1.8882005983350745e-21	1.8028957358459892	0.16	0.059	4.7363623808637006e-17	Seq_AN.Glut_2
Col9a3	3.3928533552714984e-21	1.7052714207718038	0.126	0.04	8.510633356363027e-17	Seq_AN.Glut_2
Plk2	3.475953774927429e-21	1.641066102174415	0.224	0.099	8.719082449027963e-17	Seq_AN.Glut_2
Tmem158	4.0915826438620305e-21	1.6599680102369094	0.224	0.101	1.0263325903863518e-16	Seq_AN.Glut_2
Ptprn	4.182517851798508e-21	0.81951	0.658	0.52	1.0491427779451378e-16	Seq_AN.Glut_2
Tcn2	4.5975104799451136e-21	2.2209881662032513	0.031	0.004	1.1532395287894324e-16	Seq_AN.Glut_2
Mid1ip1	8.565280873775821e-21	1.4945471368838246	0.265	0.129	2.1485150543779271e-16	Seq_AN.Glut_2
Gm32036	1.0562276991616469e-20	2.3746185586543866	0.113	0.035	2.6494415605770753e-16	Seq_AN.Glut_2
Oasl2	2.5719108542542717e-20	2.2843031230859183	0.068	0.015	6.451381186811415e-16	Seq_AN.Glut_2
Rasl11b	3.5850701129961446e-20	2.035710214568413	0.062	0.013	8.992789871439528e-16	Seq_AN.Glut_2
Pgf	3.64669130419423e-20	1.4324532157171068	0.111	0.034	9.147360467440806e-16	Seq_AN.Glut_2
Ncam1	4.398627955060746e-20	0.578479	0.86	0.8	1.1033518362474375e-15	Seq_AN.Glut_2
Lrrc1	4.4973295346397493e-20	1.2316831096916279	0.222	0.098	1.1281101404690347e-15	Seq_AN.Glut_2
Rprm	4.6531515129955284e-20	1.4055523842082724	0.179	0.071	1.1671965255197983e-15	Seq_AN.Glut_2
Cntn3	4.7331046587623546e-20	1.1631994385002808	0.494	0.312	1.187251972603949e-15	Seq_AN.Glut_2
Msi2	6.568377731329977e-20	0.7558391839119434	0.603	0.433	1.6476118701268114e-15	Seq_AN.Glut_2
Dnm3	6.956596950626637e-20	0.6338119588999698	0.784	0.695	1.7449927790951857e-15	Seq_AN.Glut_2
Plxnc1	7.708598848260533e-20	1.1528319449802529	0.449	0.286	1.933624935097672e-15	Seq_AN.Glut_2
Cntn4	1.0793652034808405e-19	0.6502185678948207	0.619	0.424	2.7074796764113404e-15	Seq_AN.Glut_2
Fezf2	1.2913055924392686e-19	2.0889368766012324	0.056	0.011	3.2391109480746612e-15	Seq_AN.Glut_2
Tshz1	1.590215639276955e-19	1.6965384851360863	0.187	0.078	3.988896909562314e-15	Seq_AN.Glut_2
Kcnd3	1.6072814551831548e-19	1.11534	0.385	0.224	4.0317048021814256e-15	Seq_AN.Glut_2
Astn2	3.3676922003698816e-19	0.9360001015018553	0.619	0.468	8.447519115407812e-15	Seq_AN.Glut_2
Gnb4	4.005705008159089e-19	1.1841578173310183	0.317	0.173	1.004791044246626e-14	Seq_AN.Glut_2
Erbb4	1.6420665571460811e-18	0.4627477295434992	0.539	0.341	4.11895975194523e-14	Seq_AN.Glut_2
Nol4	2.041811701446753e-18	0.8688842911044286	0.558	0.396	5.1216804719090345e-14	Seq_AN.Glut_2
Cntn6	2.509267040856198e-18	0.8376	0.531	0.351	6.294245445283688e-14	Seq_AN.Glut_2
Lrrtm4	3.3731807369208076e-18	0.8161361566513867	0.807	0.662	8.461286560492154e-14	Seq_AN.Glut_2
Fam174a	3.519254071003008e-18	1.2049833416240823	0.389	0.247	8.827696911703944e-14	Seq_AN.Glut_2
Gm1661	3.6789368386132785e-18	2.8552537555999487	0.045	0.008	9.228245165977547e-14	Seq_AN.Glut_2
Fbxo32	4.1884252434149655e-18	2.1041312788101885	0.062	0.014	1.0506245880582099e-13	Seq_AN.Glut_2
Gpx3	4.240518125794157e-18	1.3150668031628134	0.399	0.251	1.0636915666742063e-13	Seq_AN.Glut_2
Nek7	5.320791574542187e-18	1.0271846256605723	0.228	0.105	1.334667358558162e-13	Seq_AN.Glut_2
Unc5d	5.68284877325051e-18	0.7213561863778255	0.63	0.449	1.425485786282158e-13	Seq_AN.Glut_2
Nectin1	6.237935749222322e-18	1.5156016899427478	0.198	0.087	1.5647238033349274e-13	Seq_AN.Glut_2
Pcsk1n	6.533470315207122e-18	1.1235765490188219	0.615	0.549	1.6388556938665544e-13	Seq_AN.Glut_2
Jun	8.372467001478415e-18	1.2656188636677026	0.265	0.136	2.1001496226508456e-13	Seq_AN.Glut_2
B230216N24Rik	8.663561161278922e-18	1.4070608530448883	0.237	0.116	2.1731676816952048e-13	Seq_AN.Glut_2
Prex2	8.937370891530105e-18	1.6909225711297577	0.175	0.073	2.2418501144314116e-13	Seq_AN.Glut_2
Zdbf2	1.145389808708444e-17	0.9444685821193437	0.525	0.369	2.873095796164261e-13	Seq_AN.Glut_2
Naf1	1.2150775164971865e-17	1.6086736772166745	0.146	0.056	3.047900442381543e-13	Seq_AN.Glut_2
Pcdh7	1.5661582177980255e-17	0.748017	0.677	0.53	3.928551273524567e-13	Seq_AN.Glut_2
Cpxm2	1.8752622567110553e-17	3.3364080315511266	0.027	0.003	4.703907844734011e-13	Seq_AN.Glut_2
Ccser1	1.9849444712789484e-17	0.8774247412741101	0.71	0.605	4.979034711756114e-13	Seq_AN.Glut_2
Mgat4c	2.2077317430898717e-17	0.9351477599368527	0.654	0.482	5.537874304366634e-13	Seq_AN.Glut_2
Nrip1	2.798934799198717e-17	1.3889881414911545	0.253	0.129	7.020848050310061e-13	Seq_AN.Glut_2
Ano4	3.3774480234159967e-17	1.2520540312875283	0.325	0.186	8.471990621936686e-13	Seq_AN.Glut_2
Caprin2	5.3231746431948966e-17	0.9512581961857751	0.307	0.167	1.3352651274990078e-12	Seq_AN.Glut_2
2010204K13Rik	5.438098845001505e-17	1.1676640850489246	0.344	0.207	1.3640927142801775e-12	Seq_AN.Glut_2
Cadm1	5.4962688788135804e-17	0.4870393112861633	0.829	0.746	1.3786840855615984e-12	Seq_AN.Glut_2
Crip1	5.504927416910682e-17	1.8659713918936012	0.025	0.003	1.3808559932578755e-12	Seq_AN.Glut_2
A730035I17Rik	6.12695846402242e-17	4.195337436506206	0.012	0.001	1.5368862611153839e-12	Seq_AN.Glut_2
Ezr	1.227481686414613e-16	2.0729956292070653	0.068	0.017	3.0790150622024152e-12	Seq_AN.Glut_2
Mertk	1.7759098467140935e-16	3.2622412756610024	0.029	0.004	4.454692259497632e-12	Seq_AN.Glut_2
Snhg18	2.0040727907497355e-16	3.0868686148977518	0.035	0.006	5.027016188316637e-12	Seq_AN.Glut_2
Mesd	2.3945523454104513e-16	1.0548191513694296	0.465	0.339	6.006495103227576e-12	Seq_AN.Glut_2
Tmem176b	2.9529206414837844e-16	1.0995072300575834	0.222	0.107	7.407106137097925e-12	Seq_AN.Glut_2
Wdr66	3.7380646432957093e-16	1.4613481573217983	0.15	0.061	9.376561351242957e-12	Seq_AN.Glut_2
Spint2	4.3427581525652223e-16	1.100659406906774	0.352	0.215	1.0893374549894604e-11	Seq_AN.Glut_2
Klhdc8b	5.8534697106963355e-16	1.3520602168458673	0.233	0.119	1.4682843422310688e-11	Seq_AN.Glut_2
Jcad	6.4731303235163795e-16	2.8749164819463084	0.029	0.004	1.6237200103508486e-11	Seq_AN.Glut_2
Crispld2	6.518515835455067e-16	2.8492751841448367	0.019	0.002	1.635104512165549e-11	Seq_AN.Glut_2
Crispld1	7.301083454177792e-16	1.9138384143586196	0.07	0.019	1.8314037736459572e-11	Seq_AN.Glut_2
Gm11844	7.451097432984831e-16	2.511867330079429	0.066	0.017	1.869033280089915e-11	Seq_AN.Glut_2
Tspan5	9.189430798947288e-16	0.9859604375975439	0.401	0.258	2.3050768216079378e-11	Seq_AN.Glut_2
Irs4	9.743984745373653e-16	1.406123831321857	0.179	0.08	2.444181133529527e-11	Seq_AN.Glut_2
Ehhadh	1.3472857323936925e-15	1.6149503519373254	0.074	0.021	3.379531531136338e-11	Seq_AN.Glut_2
Stxbp5	1.3887303254799833e-15	0.9770279528629546	0.428	0.284	3.48349114843399e-11	Seq_AN.Glut_2
Serpini1	1.7910182375384e-15	1.0639018937154465	0.44	0.304	4.492590147041323e-11	Seq_AN.Glut_2
Plin2	2.174885198609203e-15	1.931645766720444	0.047	0.01	5.4554820321913244e-11	Seq_AN.Glut_2
Fam107b	2.394977127050111e-15	1.6096412776263822	0.08	0.024	6.007560625492498e-11	Seq_AN.Glut_2
Wipi1	2.8444153840606463e-15	1.4503621554631545	0.181	0.083	7.134931549377725e-11	Seq_AN.Glut_2
Lmo4	3.011043761667524e-15	0.8332485402673807	0.29	0.159	7.552902171766817e-11	Seq_AN.Glut_2
Map2k6	3.993932827046627e-15	1.7820693945037078	0.183	0.087	1.0018381103363759e-10	Seq_AN.Glut_2
Lrpap1	4.00272387154464e-15	1.015547946319765	0.494	0.373	1.0040432559382574e-10	Seq_AN.Glut_2
Scg3	5.099436875652138e-15	0.9245696601085915	0.516	0.401	1.2791427458885825e-10	Seq_AN.Glut_2
Dach1	8.327682739084568e-15	0.9936841434866214	0.296	0.167	2.088915938271973e-10	Seq_AN.Glut_2
Zic5	1.519759657451486e-14	1.639870171554113	0.101	0.035	3.8121651247513074e-10	Seq_AN.Glut_2
F13a1	1.8868650163736834e-14	1.854935728848181	0.091	0.03	4.733012207071748e-10	Seq_AN.Glut_2
Dap	2.6933298426237177e-14	1.665008720593851	0.105	0.038	6.755948577237333e-10	Seq_AN.Glut_2
Gm15155	2.875694012093137e-14	1.5095933609103915	0.175	0.081	7.213390859934425e-10	Seq_AN.Glut_2
Synpr	2.8940002870423734e-14	0.858289	0.307	0.175	7.25931032001709e-10	Seq_AN.Glut_2
Arfgef3	3.5936445453476596e-14	0.5420026840775365	0.652	0.514	9.014297977550069e-10	Seq_AN.Glut_2
Pigk	4.428126643128148e-14	0.9758164747927383	0.492	0.362	1.1107512871622645e-9	Seq_AN.Glut_2
Peg10	4.840183905187569e-14	0.6640450859806815	0.307	0.171	1.2141117307772498e-9	Seq_AN.Glut_2
Vat1	6.011957466669683e-14	1.2344083068807286	0.292	0.176	1.5080394109394234e-9	Seq_AN.Glut_2
Ctsl	6.120038374439463e-14	0.9426166042664421	0.44	0.317	1.5351504258443948e-9	Seq_AN.Glut_2
Adamts2	9.203637620613732e-14	1.5038704790197697	0.123	0.049	2.3086404607547485e-9	Seq_AN.Glut_2
Apoe	1.0103740836657714e-13	1.545412248685731	0.06	0.016	2.534422351467221e-9	Seq_AN.Glut_2
Gm11837	1.0112102810492931e-13	1.7568858428318683	0.091	0.031	2.5365198689840467e-9	Seq_AN.Glut_2
Pak6	1.465087039395526e-13	1.0621889065880212	0.247	0.133	3.6750243296197377e-9	Seq_AN.Glut_2
Gpc5	1.7114929772947569e-13	0.7411258981608864	0.403	0.266	4.293108984246168e-9	Seq_AN.Glut_2
Dnah8	1.7129525383438803e-13	2.1924289270271475	0.064	0.018	4.296770147181789e-9	Seq_AN.Glut_2
Gaa	1.8825139421622644e-13	0.7404219720626448	0.65	0.558	4.722097972519824e-9	Seq_AN.Glut_2
Mrap2	2.044360387206719e-13	1.067760763590302	0.352	0.228	5.128073595269334e-9	Seq_AN.Glut_2
Susd1	2.3774895302683887e-13	1.257628996726257	0.158	0.072	5.963694737725226e-9	Seq_AN.Glut_2
Akap17b	2.426936483331425e-13	0.932121	0.383	0.253	6.087727474788546e-9	Seq_AN.Glut_2
Por	2.982187126767488e-13	0.9188304384008091	0.412	0.283	7.480518188783566e-9	Seq_AN.Glut_2
Parva	3.0013717712473963e-13	1.1503779098835585	0.247	0.137	7.528640950996969e-9	Seq_AN.Glut_2
Fam167a	3.0499954450690384e-13	2.233908053269859	0.066	0.019	7.650608574411175e-9	Seq_AN.Glut_2
Scn9a	3.1847084020419326e-13	0.5465866890144917	0.611	0.465	7.988522555681983e-9	Seq_AN.Glut_2
Ghrh	3.200555092063373e-13	1.6875303918784113	0.056	0.015	8.028272392931765e-9	Seq_AN.Glut_2
Spcs3	3.589583868971142e-13	1.1667462841246412	0.224	0.12	9.004112176927213e-9	Seq_AN.Glut_2
Khdrbs2	3.6616278873694563e-13	0.8019234380851192	0.574	0.444	9.184827392677545e-9	Seq_AN.Glut_2
Tmem130	3.685014575465405e-13	0.7298626081769592	0.743	0.703	9.243490561097422e-9	Seq_AN.Glut_2
Alcam	4.100088984751096e-13	0.6556415056516269	0.591	0.462	1.028466320934965e-8	Seq_AN.Glut_2
Pde4b	4.871101093882933e-13	0.6900098433694213	0.648	0.512	1.221866998389595e-8	Seq_AN.Glut_2
Ar	6.275077062408574e-13	1.068244855395696	0.315	0.196	1.5740403303345666e-8	Seq_AN.Glut_2
Lsamp	6.487033416610114e-13	0.5291314687826034	0.977	0.937	1.627207462222481e-8	Seq_AN.Glut_2
Ftl1	6.705398787183793e-13	1.2055274637321576	0.358	0.25	1.6819822317771826e-8	Seq_AN.Glut_2
Pdgfc	7.213547730495484e-13	1.2327785031848644	0.115	0.046	1.8094463127174872e-8	Seq_AN.Glut_2
Hspb8	7.391827839691297e-13	2.1099017098059862	0.049	0.012	1.8541660953081647e-8	Seq_AN.Glut_2
Cacnb3	8.228605331650642e-13	1.0757138571863454	0.193	0.098	2.0640633613912468e-8	Seq_AN.Glut_2
Arhgap6	9.96232343873128e-13	0.7058041595173874	0.377	0.24	2.4989492113713542e-8	Seq_AN.Glut_2
Fam171b	1.0595094717458675e-12	0.6840221776129769	0.574	0.453	2.6576735589273342e-8	Seq_AN.Glut_2
Pik3r1	1.2297754921776222e-12	0.9617233338722853	0.294	0.179	3.0847688445783473e-8	Seq_AN.Glut_2
Gbp7	1.2755027551406195e-12	2.1785735056493323	0.039	0.009	3.19947111099473e-8	Seq_AN.Glut_2
Col6a6	1.3913241838151064e-12	2.771612188233841	0.025	0.004	3.489997582681813e-8	Seq_AN.Glut_2
Cdk14	1.5385949553871364e-12	0.6362309945549733	0.617	0.487	3.8594115860930926e-08	Seq_AN.Glut_2
Abca5	2.2184821763494924e-12	0.9614358836178503	0.333	0.212	5.5648406911550666e-8	Seq_AN.Glut_2
Rsph1	2.3084539257611073e-12	1.2434927829142308	0.111	0.044	5.790525827379162e-8	Seq_AN.Glut_2
C130093G08Rik	2.3918853088436766e-12	3.360684858873558	0.016	0.002	5.999805108703478e-8	Seq_AN.Glut_2
Diaph2	2.4268483264581055e-12	0.7647896985046312	0.36	0.231	6.087506342087512e-8	Seq_AN.Glut_2
B2m	2.454643217142984e-12	0.9211607615041505	0.148	0.067	6.157227045881462e-8	Seq_AN.Glut_2
Mbp	2.502241150092699e-12	1.972297867341349	0.076	0.025	6.276621700892527e-8	Seq_AN.Glut_2
Cish	4.050939155571693e-12	1.9267728014731942	0.051	0.014	1.0161375777836035e-7	Seq_AN.Glut_2
Mmp23	4.190971462278566e-12	2.1533594814973975	0.045	0.011	1.0512632815979555e-7	Seq_AN.Glut_2
Pnliprp2	4.7842278551699496e-12	3.3025067565454136	0.023	0.003	1.2000757151908302e-7	Seq_AN.Glut_2
Ctbp2	4.935264979214018e-12	0.746301	0.288	0.169	1.2379618673860444e-7	Seq_AN.Glut_2
Gpr37	4.9994889338979846e-12	1.572263064366437	0.041	0.01	1.2540718041789704e-7	Seq_AN.Glut_2
Elavl4	6.1809093856987975e-12	0.5478257788968677	0.626	0.514	1.5504193103086864e-7	Seq_AN.Glut_2
Tnpo1	6.874245380853248e-12	0.9031341878451169	0.337	0.217	1.7243357113332288e-7	Seq_AN.Glut_2
Id2	8.020970473644951e-12	1.2057078248357287	0.156	0.075	2.0119802336090994e-7	Seq_AN.Glut_2
Glra3	1.0359273979972749e-11	1.048736109738671	0.313	0.196	2.598520285136364e-7	Seq_AN.Glut_2
Maml2	1.0600866470502549e-11	0.9860891548338391	0.241	0.136	2.6591213454608594e-7	Seq_AN.Glut_2
Ahr	1.1229140178413771e-11	1.8662483554065883	0.07	0.023	2.81671752235331e-7	Seq_AN.Glut_2
Sh3kbp1	1.1729435886366915e-11	0.6931692485584438	0.471	0.342	2.942211697736277e-7	Seq_AN.Glut_2
Ddah2	1.2807719155681243e-11	2.1343365981533364	0.049	0.013	3.212688273011083e-7	Seq_AN.Glut_2
Cacna2d1	1.4442782437564004e-11	0.38405984848475794	0.632	0.475	3.622827546638555e-7	Seq_AN.Glut_2
4930419G24Rik	1.5181711224268712e-11	1.558775755385835	0.156	0.077	3.8081804434955635e-7	Seq_AN.Glut_2
Pou3f2	1.525105408279962e-11	0.9933977011876393	0.195	0.102	3.8255744061294564e-7	Seq_AN.Glut_2
Svil	1.9004226973908623e-11	1.324929933251539	0.093	0.035	4.767020294135239e-7	Seq_AN.Glut_2
Nenf	2.054936960426796e-11	1.1903938081641479	0.432	0.334	5.154603871534574e-7	Seq_AN.Glut_2
Abcb10	2.1259609591726446e-11	1.2057647235835183	0.21	0.115	5.332760469988662e-7	Seq_AN.Glut_2
Adcy2	2.313709573840394e-11	0.786521	0.391	0.265	5.803709095021244e-7	Seq_AN.Glut_2
Rbms3	2.401001251746202e-11	1.0667824239779962	0.453	0.345	6.022671539880172e-7	Seq_AN.Glut_2
Nrn1	2.639401616913921e-11	0.47510490467901073	0.323	0.192	6.62067501586688e-7	Seq_AN.Glut_2
Tmem178	2.964468905466352e-11	1.133702511290809	0.109	0.045	7.436073802471797e-7	Seq_AN.Glut_2
A430105J06Rik	3.276674994086504e-11	1.5644998454111185	0.068	0.022	8.219211555166585e-7	Seq_AN.Glut_2
Ccdc191	3.3958883677037644e-11	0.9627983071012148	0.247	0.145	8.518246381548123e-7	Seq_AN.Glut_2
Aga	3.416097117363364e-11	1.0885622188282713	0.126	0.056	8.568938009194262e-7	Seq_AN.Glut_2
Efhb	3.49641268590677e-11	1.603898795817266	0.072	0.025	8.770401581328542e-7	Seq_AN.Glut_2
Gm4876	3.787799307489182e-11	1.031246610787354	0.263	0.156	9.501315782905864e-7	Seq_AN.Glut_2
Apba1	4.024205300951566e-11	0.7960711217531259	0.471	0.348	1.0094316576906908e-6	Seq_AN.Glut_2
F5	4.6733858684632216e-11	2.569041392955861	0.016	0.002	1.1722721112453144e-6	Seq_AN.Glut_2
Eef1a1	4.906554307313054e-11	0.7462134221957957	0.523	0.432	1.2307600824464065e-6	Seq_AN.Glut_2
Rgl3	5.065285989229995e-11	2.9203101213144533	0.019	0.003	1.270576337538452e-6	Seq_AN.Glut_2
Nr4a3	5.247447357539389e-11	1.8859458044198463	0.045	0.012	1.3162696951651804e-6	Seq_AN.Glut_2
Ptar1	5.4081266979845224e-11	1.383225240674856	0.109	0.046	1.3565745009224376e-6	Seq_AN.Glut_2
Sptssa	6.260112632790289e-11	1.007209484477821	0.23	0.132	1.570286652809116e-6	Seq_AN.Glut_2
Gm28902	7.574836577679066e-11	1.9198828821845413	0.066	0.022	1.900072007145017e-6	Seq_AN.Glut_2
Tbc1d22a	8.115089232486422e-11	1.2891427130180468	0.152	0.076	2.035588983076894e-6	Seq_AN.Glut_2
Det1	9.094576424020134e-11	1.1131488018329705	0.115	0.05	2.2812835502012105e-6	Seq_AN.Glut_2
Lpp	9.677171778565266e-11	1.0293609783607318	0.251	0.15	2.4274217689353116e-6	Seq_AN.Glut_2
Cpa4	1.0398618695203811e-10	2.4286387449896067	0.031	0.007	2.6083895135049242e-6	Seq_AN.Glut_2
Dlg1	1.0793687403666476e-10	0.6634704751853177	0.508	0.394	2.707488548335699e-6	Seq_AN.Glut_2
Nedd4	1.0853709877796326e-10	0.5179072249376069	0.728	0.658	2.7225445857464305e-6	Seq_AN.Glut_2
Unc13c	1.1925346413471359e-10	0.7515301921034924	0.302	0.19	2.9913538943551555e-6	Seq_AN.Glut_2
Arxes2	1.3033299205758418e-10	1.131392224462485	0.36	0.257	3.2692727727724416e-6	Seq_AN.Glut_2
Plekha6	1.3180784242993303e-10	0.8760813854037266	0.374	0.257	3.3062679195124403e-6	Seq_AN.Glut_2
Chrm2	1.379573300409776e-10	1.2222230375672185	0.366	0.262	3.460521666747882e-6	Seq_AN.Glut_2
Grpr	1.9244220637675686e-10	1.8523450742631473	0.051	0.015	4.827220304754569e-6	Seq_AN.Glut_2
Aldh1a1	1.9520904254491393e-10	2.0504168117082964	0.014	0.002	4.8966236231966214e-06	Seq_AN.Glut_2
Gnaq	2.595317636282625e-10	0.6470343136306875	0.568	0.47	6.510094758851336e-6	Seq_AN.Glut_2
Casd1	2.639306584425479e-10	0.7743091140264309	0.36	0.246	6.620436636372871e-6	Seq_AN.Glut_2
Plp1	2.725687042757881e-10	2.405182583982286	0.051	0.015	6.837113378053869e-6	Seq_AN.Glut_2
Nol3	3.0002768876302883e-10	1.4177421569367556	0.163	0.085	7.525894544931815e-6	Seq_AN.Glut_2
Gnas	3.0630258631161186e-10	0.35875085947579244	0.92	0.906	7.683294075040472e-6	Seq_AN.Glut_2
Cpq	3.088021312487595e-10	1.2463854089313537	0.152	0.077	7.745992660243883e-6	Seq_AN.Glut_2
Ppfia2	3.331925564472324e-10	0.6334341194937454	0.722	0.636	8.357802085922377e-6	Seq_AN.Glut_2
Slc7a11	3.439429570880525e-10	2.0916550655246033	0.033	0.008	8.62746513559671e-6	Seq_AN.Glut_2
Gm1673	3.6666726135853055e-10	0.855963	0.479	0.408	9.197481583917381e-6	Seq_AN.Glut_2
Meig1	3.8844750542126095e-10	1.4746208500515183	0.076	0.028	9.74381722598691e-6	Seq_AN.Glut_2
Cds2	4.3861115980855266e-10	0.7918748803653868	0.391	0.278	1.1002122332637736e-5	Seq_AN.Glut_2
Kcnf1	4.710429076987718e-10	1.9611705067614016	0.08	0.031	1.1815640296715992e-5	Seq_AN.Glut_2
Elavl2	4.719883964978302e-10	0.5349399679210454	0.593	0.478	1.1839356937751574e-5	Seq_AN.Glut_2
Bmp6	5.068385876283122e-10	2.3483347410102935	0.039	0.01	1.2713539132068584e-5	Seq_AN.Glut_2
St3gal1	5.138735046368975e-10	2.081667989739696	0.041	0.011	1.2890002990311937e-5	Seq_AN.Glut_2
Arnt2	5.202356649414481e-10	0.677745	0.391	0.274	1.3049591419391284e-5	Seq_AN.Glut_2
Abca1	5.332003071929863e-10	1.4883961309490377	0.056	0.018	1.3374796505628868e-5	Seq_AN.Glut_2
Ust	5.523517551612369e-10	1.1287307424232411	0.148	0.074	1.3855191426464465e-5	Seq_AN.Glut_2
Dnah1	5.652627872771696e-10	0.9077378435818622	0.181	0.096	1.4179051756060522e-5	Seq_AN.Glut_2
Spock1	6.689449390145239e-10	0.599542	0.558	0.438	1.6779814850240315e-5	Seq_AN.Glut_2
Smc6	7.85259306264629e-10	0.5953519521792945	0.578	0.465	1.9697444438341955e-5	Seq_AN.Glut_2
Mdk	9.809301638350454e-10	2.1460741093240134	0.021	0.003	2.4605652229638278e-5	Seq_AN.Glut_2
Tspo	1.3653246023809747e-9	3.439963334315045	0.021	0.004	3.424780232612437e-5	Seq_AN.Glut_2
Scrn1	1.6001122387315326e-9	0.6722638806392732	0.424	0.321	4.0137215396341766e-5	Seq_AN.Glut_2
Gm17473	1.8438915661827485e-9	1.5975251356937918	0.031	0.007	4.6252176046128064e-5	Seq_AN.Glut_2
Lrrc58	1.8868444615635456e-9	0.7961640246129162	0.352	0.247	4.7329606473859977e-5	Seq_AN.Glut_2
Dkk3	1.8922701832957958e-9	1.1155553004591836	0.181	0.101	4.746570527779174e-5	Seq_AN.Glut_2
P3h4	1.9120359244687258e-9	1.0270948917977587	0.167	0.089	4.796150912937352e-5	Seq_AN.Glut_2
Eif4e3	2.2131034816255145e-9	1.0760366938032906	0.158	0.083	5.5513487733094406e-5	Seq_AN.Glut_2
Pcdh10	2.266794379104485e-9	0.7381520666177539	0.428	0.322	5.68602702054569e-5	Seq_AN.Glut_2
Col6a2	2.3046279260723622e-9	1.5310280118014288	0.047	0.014	5.780928689759913e-5	Seq_AN.Glut_2
Gm20713	2.4883246831843345e-9	1.1744371603880217	0.128	0.063	6.241713635299585e-5	Seq_AN.Glut_2
Igsf3	2.5015663827753606e-9	1.120105121939712	0.16	0.085	6.274929114553714e-5	Seq_AN.Glut_2
Gm15261	2.6962753055280136e-9	0.6312245307183224	0.132	0.064	6.763336976386469e-5	Seq_AN.Glut_2
Zbbx	2.8123697900021147e-9	1.6949704635827558	0.086	0.036	7.054548381241305e-5	Seq_AN.Glut_2
Kcnmb4	2.904221514908047e-9	1.075273227812007	0.126	0.061	7.284949247995344e-5	Seq_AN.Glut_2
Rgs12	3.0248653821381413e-9	1.109068874594627	0.121	0.058	7.587572324555314e-5	Seq_AN.Glut_2
Ctxn1	3.1529252722160988e-9	0.8248318077836938	0.307	0.206	7.908797752826863e-5	Seq_AN.Glut_2
Suox	3.446349568045785e-9	1.970157524713366	0.041	0.012	8.644823256486047e-5	Seq_AN.Glut_2
Hsph1	3.4489524542614113e-9	0.791138	0.467	0.384	8.651352336269325e-5	Seq_AN.Glut_2
Erp29	3.5449680424375556e-9	0.8901495879178478	0.451	0.356	8.892197837650364e-5	Seq_AN.Glut_2
Lgals3bp	3.5980234754160928e-9	1.4071082151666294	0.084	0.035	9.025282085733726e-5	Seq_AN.Glut_2
Parp4	3.740439763455182e-9	1.6310469419249567	0.062	0.022	9.38251910265098e-5	Seq_AN.Glut_2
Rfx2	4.2392025186872284e-9	1.337560700854803	0.068	0.025	1.0633615597875044e-4	Seq_AN.Glut_2
Arid1b	4.631444547721387e-9	0.8644563379076371	0.342	0.243	1.1617515503504327e-4	Seq_AN.Glut_2
Itgb1	4.772697401441188e-9	0.6887086442432155	0.333	0.226	1.1971834161775077e-4	Seq_AN.Glut_2
Trim56	4.981381137290065e-9	2.0973562857796644	0.021	0.004	1.2495296444778398e-4	Seq_AN.Glut_2
Gm12120	5.202027715355592e-9	1.7892613276212774	0.064	0.023	1.3048766321197968e-4	Seq_AN.Glut_2
Ccdc152	5.2139817312266814e-9	2.8798479204598157	0.016	0.003	1.3078751774609008e-4	Seq_AN.Glut_2
Fut9	6.059012304900694e-9	0.6167282910811491	0.547	0.455	1.5198426465612902e-4	Seq_AN.Glut_2
Gm36033	6.600244887262572e-9	1.6333958445057495	0.043	0.013	1.6556054275209436e-4	Seq_AN.Glut_2
Gm44440	7.818238977226433e-9	3.3439767679193118	0.01	0.001	1.9611270650474785e-4	Seq_AN.Glut_2
Gm45352	7.844111471499611e-9	1.8827095698230698	0.08	0.033	1.9676169215109623e-4	Seq_AN.Glut_2
C1qtnf7	9.02239925707926e-9	2.25875	0.012	0.002	2.2631786296457615e-4	Seq_AN.Glut_2
Slc22a15	9.494742132159175e-9	0.897788	0.191	0.111	2.3816611164308074e-4	Seq_AN.Glut_2
Alg2	9.706805207125004e-9	0.702458	0.432	0.333	2.4348550181552361e-4	Seq_AN.Glut_2
Clcn3	1.0182276096370636e-8	0.5323242978709102	0.599	0.511	2.5541221360136105e-4	Seq_AN.Glut_2
Olfm3	1.0531786819222772e-8	0.539635	0.494	0.37	2.64179340573384e-4	Seq_AN.Glut_2
Tesc	1.1340629715682004e-8	1.0905588945672111	0.105	0.049	2.844683557881674e-4	Seq_AN.Glut_2
Clcn5	1.2631897045687429e-8	0.7131735449960573	0.257	0.162	3.168585054940235e-4	Seq_AN.Glut_2
Gm43857	1.3044899372333086e-8	3.4232904193588407	0.01	0.001	3.2721825585560314e-4	Seq_AN.Glut_2
4833427G06Rik	1.4101673231759148e-8	2.2614215334285266	0.019	0.003	3.537263713454465e-4	Seq_AN.Glut_2
Rdh12	1.4584222299868028e-8	1.8638158940830243	0.047	0.015	3.658306321698896e-4	Seq_AN.Glut_2
Cyp4f17	1.461191727899196e-8	1.7743399186082152	0.064	0.024	3.6652533302623433e-4	Seq_AN.Glut_2
Kl	1.4854400293917986e-8	2.1571419678903996	0.033	0.009	3.7260777697263874e-4	Seq_AN.Glut_2
Mvb12b	1.514009062038858e-8	0.7522837244453072	0.261	0.168	3.7977403312182715e-4	Seq_AN.Glut_2
Crem	1.5637636894619874e-8	0.9378910102233637	0.181	0.103	3.9225448386464494e-4	Seq_AN.Glut_2
Hipk2	1.6892003221242323e-8	0.7648921403262837	0.274	0.18	4.2371900880164244e-4	Seq_AN.Glut_2
Gm4258	1.807847116882089e-8	1.0031323735137323	0.2	0.119	4.534803707987032e-4	Seq_AN.Glut_2
AW551984	1.9837382499371527e-8	0.551396	0.348	0.239	4.976009026142354e-4	Seq_AN.Glut_2
Scn3a	2.3276869610350543e-8	0.4974176832657451	0.652	0.548	5.83876997306033e-4	Seq_AN.Glut_2
Lmcd1	2.3398410367476053e-8	3.3382776907844205	0.014	0.002	5.869257256577693e-4	Seq_AN.Glut_2
Dusp26	2.3444456828338888e-8	0.7305168048081015	0.438	0.353	5.880807550820527e-4	Seq_AN.Glut_2
Sgsm1	2.3901764151193547e-8	0.6163814773659712	0.436	0.333	5.995518519685389e-4	Seq_AN.Glut_2
Zic1	2.420731511675343e-8	0.7205453583306858	0.272	0.174	6.072162923886431e-4	Seq_AN.Glut_2
Baiap3	2.426115628518083e-8	0.38858389465996246	0.611	0.488	6.085668442574759e-4	Seq_AN.Glut_2
Lrrc8c	2.4924317128693488e-8	0.8648368942866644	0.16	0.089	6.252015708561474e-4	Seq_AN.Glut_2
Stxbp2	2.530395548883972e-8	1.194712462673381	0.132	0.068	6.347244194820555e-4	Seq_AN.Glut_2
Tmx4	2.6281971124449443e-8	0.5911071562377868	0.677	0.616	6.592569636856898e-4	Seq_AN.Glut_2
Ndrg2	2.667538361069359e-8	1.3583037204539798	0.082	0.035	6.69125322490638e-4	Seq_AN.Glut_2
Thegl	2.6841364867044563e-8	3.5169489495075537	0.012	0.002	6.732887963249458e-4	Seq_AN.Glut_2
Fstl5	2.8926516627469887e-8	0.71686	0.416	0.315	7.255927430834546e-4	Seq_AN.Glut_2
Ltbp4	3.108209211861942e-8	1.0677639941409942	0.171	0.097	7.796631987034496e-4	Seq_AN.Glut_2
Entpd1	3.1493497349244826e-8	2.0143148063376835	0.033	0.009	7.899828875084572e-4	Seq_AN.Glut_2
Cbfa2t3	3.3565863460928215e-8	0.9841562910087536	0.076	0.031	8.419661190539234e-4	Seq_AN.Glut_2
Igtp	3.700661503906539e-8	2.878361886731451	0.019	0.003	9.282739316399163e-4	Seq_AN.Glut_2
Rpl8	3.7752574337787194e-8	0.7208792605876442	0.442	0.363	9.46985574689054e-4	Seq_AN.Glut_2
Spa17	3.78458034130658e-8	1.018812138263651	0.115	0.057	9.493241328133426e-4	Seq_AN.Glut_2
Pak3	4.195918751850677e-8	0.36175099352474094	0.767	0.711	0.0010525	Seq_AN.Glut_2
Mks1	4.537883502089449e-8	1.1405652632640313	0.095	0.043	0.00113828	Seq_AN.Glut_2
Dpf3	4.625763820166029e-8	0.9203129742893956	0.123	0.062	0.00116033	Seq_AN.Glut_2
Baz2b	4.97594480010406e-8	0.47769698766244084	0.574	0.467	0.00124817	Seq_AN.Glut_2
Syt4	5.62128589255188e-8	0.833486	0.527	0.461	0.00141004	Seq_AN.Glut_2
C79798	6.070173591459907e-8	1.8257950913739989	0.058	0.022	0.00152264	Seq_AN.Glut_2
Tmem2	6.265629130300186e-8	1.1856321390979285	0.119	0.06	0.00157167	Seq_AN.Glut_2
Astn1	7.712172112227699e-8	0.5083926221107327	0.545	0.446	0.00193452	Seq_AN.Glut_2
Arpc1b	7.98499214027448e-8	1.4245926583743893	0.076	0.033	0.00200296	Seq_AN.Glut_2
Fhad1	8.157687373286779e-8	0.6483264687743833	0.239	0.152	0.00204627	Seq_AN.Glut_2
Atp8b5	8.27834395831219e-8	1.396658155181818	0.058	0.022	0.00207654	Seq_AN.Glut_2
Tspear	8.425226054040863e-8	1.6461978692745358	0.066	0.026	0.00211338	Seq_AN.Glut_2
Ndn	9.341174146132062e-8	0.889065	0.372	0.299	0.00234314	Seq_AN.Glut_2
Efna5	1.0002271457104066e-7	0.6956498506704429	0.428	0.326	0.00250897	Seq_AN.Glut_2
Zdhhc14	1.0264892132038268e-7	0.9220487361656529	0.278	0.193	0.00257485	Seq_AN.Glut_2
Cmip	1.0774221712043078e-7	0.44105685601033184	0.619	0.532	0.00270261	Seq_AN.Glut_2
Prdx4	1.1113181787801552e-7	0.8934721744719082	0.189	0.114	0.00278763	Seq_AN.Glut_2
Foxo3	1.1514761699792625e-7	1.2271168454719867	0.132	0.071	0.00288836	Seq_AN.Glut_2
March8	1.2675244560622942e-7	0.7686376218738672	0.233	0.149	0.00317946	Seq_AN.Glut_2
Popdc3	1.3013569060947203e-7	2.344918914623621	0.019	0.004	0.00326432	Seq_AN.Glut_2
Tgoln1	1.3882535468524745e-7	0.7204965009199323	0.409	0.323	0.0034823	Seq_AN.Glut_2
Gm32647	1.499759786171465e-7	0.9042968231571022	0.35	0.258	0.003762	Seq_AN.Glut_2
Neat1	1.527193921352939e-7	1.5921247579224254	0.037	0.011	0.00383081	Seq_AN.Glut_2
Kcnh4	1.5296106711616413e-7	1.7968440502427407	0.056	0.021	0.00383688	Seq_AN.Glut_2
Osbpl3	1.5616642351999913e-7	0.9677305366023992	0.111	0.056	0.00391728	Seq_AN.Glut_2
Cbarp	1.5830265651641604e-7	0.6578701161960581	0.428	0.329	0.00397086	Seq_AN.Glut_2
Clu	1.7355379019027814e-7	0.6556210750717203	0.403	0.308	0.00435342	Seq_AN.Glut_2
Pbx1	1.7813462039506768e-7	0.581568	0.547	0.461	0.00446833	Seq_AN.Glut_2
1700028P14Rik	1.863147718883473e-7	2.3586803835969263	0.019	0.004	0.00467352	Seq_AN.Glut_2
Setbp1	1.9606499232970572e-7	0.7317968783236865	0.403	0.303	0.00491809	Seq_AN.Glut_2
Cngb1	1.988093995918056e-7	1.643684180084439	0.078	0.035	0.00498693	Seq_AN.Glut_2
AC131720.1	2.026877496533354e-7	1.8454606408240415	0.041	0.013	0.00508422	Seq_AN.Glut_2
Sync	2.0327500943007813e-7	1.6862491359741267	0.056	0.021	0.00509895	Seq_AN.Glut_2
Ralyl	2.2264356581525542e-7	0.39128298263869254	0.782	0.712	0.00558479	Seq_AN.Glut_2
Ush2a	2.440080801121138e-7	2.094730339821724	0.045	0.016	0.0061207	Seq_AN.Glut_2
Cd59a	2.5059885336416255e-7	0.7101391800400962	0.216	0.136	0.00628602	Seq_AN.Glut_2
[truncated: 19,744 more rows]

## Sheet: Table 3
sc/snRNA-seq: Glutamatergic neuron marker genes
gene	p_val	avg_log2FC	pct.1	pct.2	p_val_adj	cluster
Gpc5	0	2.8954218739499433	0.812	0.31	0	Seq_e1.Crh-Scgn
Tns1	0	3.6762725689649334	0.422	0.053	0	Seq_e1.Crh-Scgn
Agtr1a	0	4.4086585974809775	0.352	0.024	0	Seq_e1.Crh-Scgn
Crh	0	5.232159013271439	0.327	0.027	0	Seq_e1.Crh-Scgn
Fam159a	0	4.693066072312929	0.294	0.018	0	Seq_e1.Crh-Scgn
Rufy4	0	4.347047562983905	0.203	0.013	0	Seq_e1.Crh-Scgn
Gm30373	0	4.291243019155661	0.182	0.013	0	Seq_e1.Crh-Scgn
5330439M10Rik	0	5.481835515622873	0.138	0.004	0	Seq_e1.Crh-Scgn
Scgn	0	5.575370569697306	0.125	0.004	0	Seq_e1.Crh-Scgn
Nrxn3	3.203529495338071e-303	2.0672430728689455	0.896	0.624	8.035733386106017e-299	Seq_e1.Crh-Scgn
Nnat	2.829575689222425e-285	1.6001280206028001	0.902	0.513	7.097707658845531e-281	Seq_e1.Crh-Scgn
Bcl11a	5.279629044959351e-283	2.7922499702301735	0.413	0.095	1.3243421496376036e-278	Seq_e1.Crh-Scgn
Pgf	1.568339515478558e-276	3.560211406270905	0.246	0.032	3.9340228406264146e-272	Seq_e1.Crh-Scgn
Dach1	4.735198998605834e-272	2.0921056887312526	0.537	0.161	1.1877773168102873e-267	Seq_e1.Crh-Scgn
Dlk1	8.505852226712147e-266	2.1360337034055474	0.636	0.223	2.133607972548475e-261	Seq_e1.Crh-Scgn
Gm20713	1.3127249897223693e-250	3.162854019227346	0.338	0.071	3.292839364219591e-246	Seq_e1.Crh-Scgn
Ramp1	1.4858476753226403e-246	4.189022609060333	0.179	0.018	3.727100308779311e-242	Seq_e1.Crh-Scgn
Nr3c1	2.7585539292447142e-244	2.2225146229260218	0.655	0.299	6.919556676117441e-240	Seq_e1.Crh-Scgn
Kcnip1	6.504752559616428e-244	1.8769752875983345	0.766	0.431	1.6316521320541847e-239	Seq_e1.Crh-Scgn
Trpc5	1.83955816927749e-237	2.005473122411686	0.614	0.243	4.614347711815656e-233	Seq_e1.Crh-Scgn
Zbtb20	2.2330426106729926e-236	1.4711549080369286	0.846	0.591	5.601364084612135e-232	Seq_e1.Crh-Scgn
Stk32a	3.299344814923588e-228	2.3736094761956603	0.446	0.131	8.276076533754329e-224	Seq_e1.Crh-Scgn
Sv2c	2.2646941812485435e-227	3.187879305287453	0.282	0.053	5.680758884243847e-223	Seq_e1.Crh-Scgn
Ppp1r17	8.875097396239991e-227	2.9177336109839427	0.248	0.04	2.2262294308728395e-222	Seq_e1.Crh-Scgn
Pde6b	4.017351463366475e-224	6.085897957071191	0.081	0.002	1.0077124410708467e-219	Seq_e1.Crh-Scgn
Ephb1	6.169487027617628e-219	2.2810225310634045	0.469	0.15	1.5475541260076057e-214	Seq_e1.Crh-Scgn
Sphkap	3.094223279430414e-210	2.228285193289329	0.614	0.285	7.761549674123251e-206	Seq_e1.Crh-Scgn
Gfra1	7.323502356824216e-205	2.529642462702114	0.36	0.094	1.8370273311857863e-200	Seq_e1.Crh-Scgn
Ucp2	3.1917573405473436e-204	3.633162360680682	0.148	0.015	8.006204113028956e-200	Seq_e1.Crh-Scgn
Rgs6	2.674377059412086e-197	2.7530935693520027	0.379	0.11	6.708407415829276e-193	Seq_e1.Crh-Scgn
Rbms1	5.941175976075965e-186	1.9176016183261348	0.583	0.263	1.490284581838895e-181	Seq_e1.Crh-Scgn
Fmnl2	1.8787890666646984e-185	2.4062280511539464	0.553	0.261	4.7127544948217295e-181	Seq_e1.Crh-Scgn
Pcdh9	4.1619108270752176e-184	1.2092448368740376	0.947	0.807	1.0439737118635475e-179	Seq_e1.Crh-Scgn
Ptprk	3.846916531569543e-165	1.5718637406151843	0.525	0.208	9.649605427789041e-161	Seq_e1.Crh-Scgn
Zbtb16	1.4791088076893074e-163	2.5428664654182067	0.277	0.068	3.710196533207859e-159	Seq_e1.Crh-Scgn
Adamts5	3.2499475690027805e-162	3.9084064825948523	0.113	0.011	8.152168482086574e-158	Seq_e1.Crh-Scgn
Dapl1	7.220643645773963e-157	4.658643384736338	0.07	0.003	1.8112262521059408e-152	Seq_e1.Crh-Scgn
Ern1	3.415927358615477e-154	2.3478662213078842	0.306	0.085	8.568512186351062e-150	Seq_e1.Crh-Scgn
Fam46a	1.0991919275960078e-152	2.544291668098216	0.298	0.083	2.757213031181826e-148	Seq_e1.Crh-Scgn
Acot12	7.28572218830052e-152	4.907478495058565	0.089	0.006	1.8275505537133023e-147	Seq_e1.Crh-Scgn
Nr3c2	2.8470196940503525e-151	2.0407620996537905	0.51	0.237	7.141464200555904e-147	Seq_e1.Crh-Scgn
Pcdh7	2.6754796833413935e-150	1.2193946327619813	0.76	0.483	6.711173237693551e-146	Seq_e1.Crh-Scgn
Sema5a	3.3019069119396997e-146	1.948225309940922	0.499	0.229	8.282503297909543e-142	Seq_e1.Crh-Scgn
Creb3l2	5.599174190949864e-145	2.6688896794023007	0.217	0.047	1.404496854057864e-140	Seq_e1.Crh-Scgn
Adam23	8.706395840808556e-143	1.3796837886679987	0.716	0.469	2.1839123327084184e-138	Seq_e1.Crh-Scgn
Maml3	1.6996269388760006e-142	1.914278942509703	0.433	0.172	4.26334421347656e-138	Seq_e1.Crh-Scgn
C230057M02Rik	3.5957471948789553e-141	3.0589196857535503	0.148	0.022	9.01957226363437e-137	Seq_e1.Crh-Scgn
Fyb2	3.947330712527315e-139	3.5858078782358898	0.226	0.055	9.901484359303518e-135	Seq_e1.Crh-Scgn
Lsamp	3.8284372130569517e-137	0.7986462346706977	0.993	0.951	9.603251905232057e-133	Seq_e1.Crh-Scgn
Btg2	9.276012394218535e-133	3.2332603025962836	0.226	0.056	2.326794948965777e-128	Seq_e1.Crh-Scgn
Gm10165	1.3304329538557433e-132	6.869614718325307	0.039	0	3.3372580214517466e-128	Seq_e1.Crh-Scgn
Sema3e	4.68401826708724e-131	2.999247909603486	0.165	0.03	1.1749391421161634e-126	Seq_e1.Crh-Scgn
Csmd1	1.1955894502134792e-129	1.3846304658157211	0.825	0.67	2.999016576915491e-125	Seq_e1.Crh-Scgn
Calcr	2.751746930185468e-127	2.039603363545286	0.299	0.091	6.902481999677228e-123	Seq_e1.Crh-Scgn
Luzp2	5.127067883901167e-120	1.0730744781622943	0.752	0.496	1.2860737079977687e-115	Seq_e1.Crh-Scgn
Dock1	5.269622285994221e-120	2.6008265453757557	0.226	0.059	1.3218320542187904e-115	Seq_e1.Crh-Scgn
Rtl4	1.964009897570168e-118	1.504212074090614	0.516	0.251	4.9265224270650094e-114	Seq_e1.Crh-Scgn
Carmil1	1.5158010142916148e-117	2.0458788657022207	0.403	0.172	3.802235264249087e-113	Seq_e1.Crh-Scgn
Setx	7.235355324751387e-116	1.6171990809925023	0.621	0.394	1.814916529660638e-111	Seq_e1.Crh-Scgn
Kcnh1	1.3908977149101812e-115	1.8055028822531134	0.379	0.151	3.4889278280806985e-111	Seq_e1.Crh-Scgn
Spata13	3.327652668739396e-114	2.763683489426292	0.145	0.026	8.347083954265901e-110	Seq_e1.Crh-Scgn
Kcnd2	6.38781810653336e-114	1.108456553844288	0.857	0.734	1.602320293842828e-109	Seq_e1.Crh-Scgn
Tmcc3	5.26229838049918e-113	1.5946433578465176	0.539	0.3	1.3199949257644142e-108	Seq_e1.Crh-Scgn
Sstr2	1.201900054783901e-112	2.9355644120550073	0.165	0.034	3.014846097419937e-108	Seq_e1.Crh-Scgn
Tcf4	6.73640243692871e-112	1.2625897138533455	0.569	0.303	1.6897591872791975e-107	Seq_e1.Crh-Scgn
Ghr	2.3221846868133983e-111	1.275673160841244	0.533	0.268	5.824968068402729e-107	Seq_e1.Crh-Scgn
Ebf3	3.399582268118081e-110	1.8181944908016827	0.25	0.071	8.527512161347395e-106	Seq_e1.Crh-Scgn
Cd302	5.683598597057089e-109	2.959785711194461	0.221	0.062	1.4256738720858003e-104	Seq_e1.Crh-Scgn
Lmo3	1.167188440661563e-108	1.8026897047292465	0.374	0.151	2.927775484555465e-104	Seq_e1.Crh-Scgn
Cxcl14	8.987402788964572e-108	3.5134794155145133	0.109	0.016	2.254400115583873e-103	Seq_e1.Crh-Scgn
Ptbp3	1.1465541924212776e-107	1.6785890972254598	0.386	0.161	2.876016536269533e-103	Seq_e1.Crh-Scgn
3222401L13Rik	1.7630806523998034e-107	2.632177918776672	0.155	0.032	4.422511508479667e-103	Seq_e1.Crh-Scgn
Ccser1	2.8087768683893204e-107	1.093839304991211	0.783	0.615	7.045535896667771e-103	Seq_e1.Crh-Scgn
Arnt2	7.358423436480242e-105	1.5533480785441383	0.519	0.288	1.845786934806704e-100	Seq_e1.Crh-Scgn
Depdc1b	5.344961889273514e-102	5.575056997654832	0.037	0.001	1.3407302403053682e-97	Seq_e1.Crh-Scgn
Tent5a	5.8037495317085095e-102	3.5971222066690363	0.088	0.011	1.4558125325337626e-97	Seq_e1.Crh-Scgn
Dscaml1	2.0125238367667935e-101	1.6626049617598324	0.386	0.165	5.048214792145825e-97	Seq_e1.Crh-Scgn
Kcnd3	8.108936277158972e-101	1.7449539736697246	0.46	0.239	2.0340455757625565e-96	Seq_e1.Crh-Scgn
Klf4	1.8048552283401248e-98	3.8378916458131984	0.072	0.007	4.527298854768369e-94	Seq_e1.Crh-Scgn
Slit2	2.2809675168705108e-98	1.2891201115545523	0.519	0.267	5.721578919317989e-94	Seq_e1.Crh-Scgn
Pou3f2	7.850497072550111e-97	2.019421130974477	0.318	0.124	1.9692186856784697e-92	Seq_e1.Crh-Scgn
Alk	1.0239354838074878e-94	2.0498911210546202	0.403	0.194	2.5684397675827024e-90	Seq_e1.Crh-Scgn
Junb	6.325517838933442e-94	2.7088732780890554	0.194	0.054	1.5866928947180647e-89	Seq_e1.Crh-Scgn
Baz2b	7.212678912786207e-94	1.0720599755966433	0.684	0.466	1.8092283784832922e-89	Seq_e1.Crh-Scgn
1700016P03Rik	2.7491153015750073e-93	2.52326	0.208	0.061	6.895880822470748e-89	Seq_e1.Crh-Scgn
Sim1	3.765640821209548e-93	1.2650502843915563	0.491	0.25	9.44573343592203e-89	Seq_e1.Crh-Scgn
Shisal2a	2.2918034673962698e-91	4.326622896993772	0.047	0.003	5.748759817616803e-87	Seq_e1.Crh-Scgn
Morc4	6.919610806109245e-91	2.3404564986955823	0.208	0.062	1.7357151746044433e-86	Seq_e1.Crh-Scgn
Fos	6.414708584760293e-90	2.804036724235221	0.203	0.061	1.609065501401272e-85	Seq_e1.Crh-Scgn
Gpc6	7.924244775984029e-90	1.1529991279588745	0.547	0.312	1.987717559607834e-85	Seq_e1.Crh-Scgn
Tnr	2.441697629586174e-89	1.4873453273451336	0.547	0.343	6.124754334053959e-85	Seq_e1.Crh-Scgn
Rab3b	2.7522809209425018e-89	1.319462018211881	0.462	0.236	6.903821462092171e-85	Seq_e1.Crh-Scgn
Asic2	5.615155904612545e-88	1.165833560658259	0.738	0.565	1.4085057071130108e-83	Seq_e1.Crh-Scgn
Limch1	8.977772088505004e-87	1.1656864454854963	0.62	0.415	2.2519843506805953e-82	Seq_e1.Crh-Scgn
Rab31	6.446015834526676e-86	2.043573593352198	0.264	0.097	1.6169186119326714e-81	Seq_e1.Crh-Scgn
Gm12064	1.9393748508322334e-85	2.8319292510033884	0.099	0.016	4.8647278758275745e-81	Seq_e1.Crh-Scgn
Grm3	4.5428032675371843e-85	1.6665950398798077	0.41	0.204	1.1395167716290274e-80	Seq_e1.Crh-Scgn
Slc12a7	6.43988943503681e-83	3.599213343490078	0.057	0.005	1.6153818658846334e-78	Seq_e1.Crh-Scgn
Plcl1	9.965047277087099e-82	2.097881395359603	0.327	0.145	2.4996324589845277e-77	Seq_e1.Crh-Scgn
Fstl4	1.2640442307675261e-81	1.4283743244565148	0.481	0.269	3.1707285484572627e-77	Seq_e1.Crh-Scgn
Pcdh15	2.345409953040927e-80	0.9749987464378056	0.742	0.579	5.883226326207861e-76	Seq_e1.Crh-Scgn
Cnksr2	6.713654801421287e-80	1.624755924504397	0.465	0.273	1.6840531703885156e-75	Seq_e1.Crh-Scgn
Gm4128	1.5253242403120184e-79	4.3193237007392415	0.038	0.002	3.826123324398667e-75	Seq_e1.Crh-Scgn
Gm33609	1.8401285336638584e-79	5.882179458554839	0.027	0.001	4.615778413842422e-75	Seq_e1.Crh-Scgn
Airn	1.902359574064446e-79	1.6766523693274382	0.315	0.134	4.771878755583257e-75	Seq_e1.Crh-Scgn
Podxl2	2.7766624493482625e-78	1.1779083161129313	0.662	0.478	6.964980087945181e-74	Seq_e1.Crh-Scgn
Ppfia2	1.3361016175100787e-77	1.0351840713337204	0.747	0.664	3.3514772973622814e-73	Seq_e1.Crh-Scgn
Map2	1.607993794279652e-77	0.5836348536974074	0.92	0.855	4.033491633571079e-73	Seq_e1.Crh-Scgn
Srrm4	4.000569856037865e-77	1.1620734377748323	0.618	0.435	1.003502942688538e-72	Seq_e1.Crh-Scgn
Irak3	1.1169915257372879e-76	5.969945999421094	0.026	0.001	2.801861543159413e-72	Seq_e1.Crh-Scgn
Gabra2	2.782746074589956e-75	0.9435891174610429	0.747	0.631	6.980240253501446e-71	Seq_e1.Crh-Scgn
Igdcc3	2.273968140580827e-73	3.034114114374636	0.085	0.014	5.704021683832946e-69	Seq_e1.Crh-Scgn
Msi2	1.0915608199122893e-72	1.0502750324977415	0.605	0.416	2.7380711606679865e-68	Seq_e1.Crh-Scgn
Kcnip4	8.192159665481292e-72	0.5160221191520771	0.923	0.795	2.0549213304893272e-67	Seq_e1.Crh-Scgn
Rgs2	1.3980936410101685e-71	2.158331639584622	0.373	0.201	3.5069780891099066e-67	Seq_e1.Crh-Scgn
Smc6	1.5762891891933522e-71	1.1316393845265098	0.637	0.471	3.953963802172605e-67	Seq_e1.Crh-Scgn
Fa2h	3.305765183140688e-71	4.328218229557242	0.042	0.003	8.292181385390102e-67	Seq_e1.Crh-Scgn
Tesc	5.501194837968945e-71	2.3832903965116703	0.165	0.049	1.37991971315613e-66	Seq_e1.Crh-Scgn
Pex5l	6.067546017670113e-71	1.1999346636606516	0.485	0.281	1.5219832430723713e-66	Seq_e1.Crh-Scgn
Csgalnact1	2.4051585753452267e-70	1.6388155063708458	0.253	0.099	6.033099770395967e-66	Seq_e1.Crh-Scgn
Fezf2	2.718494587601753e-70	3.001770969583318	0.083	0.014	6.819071823540237e-66	Seq_e1.Crh-Scgn
Trim10	3.494026967769547e-70	9.500995819805896	0.018	0	8.764417245953131e-66	Seq_e1.Crh-Scgn
Gm14114	4.497142702539192e-70	2.4570906821024097	0.104	0.022	1.128063275504931e-65	Seq_e1.Crh-Scgn
Grik4	6.311202985729544e-70	1.4458978908666036	0.373	0.188	1.583102156940399e-65	Seq_e1.Crh-Scgn
Tpmt	5.001828140167597e-69	2.829660269758037	0.132	0.034	1.25465857067964e-64	Seq_e1.Crh-Scgn
Grid2	5.288890126600935e-69	0.8509752753470106	0.815	0.709	1.3266651993565784e-64	Seq_e1.Crh-Scgn
B2m	2.892716344945769e-68	2.4281032213997094	0.19	0.065	7.256089679661966e-64	Seq_e1.Crh-Scgn
Cdc14b	6.9839661744508506e-68	1.563689299955898	0.366	0.188	1.7518580751992513e-63	Seq_e1.Crh-Scgn
Fat3	1.3573682260206288e-67	1.390736906053013	0.461	0.275	3.404822458150145e-63	Seq_e1.Crh-Scgn
Tead4	1.56202970608351e-67	4.28654	0.029	0.001	3.9181953147398765e-63	Seq_e1.Crh-Scgn
Hcn1	1.7893466547183806e-67	1.2822075904670298	0.41	0.22	4.488397148695586e-63	Seq_e1.Crh-Scgn
Lima1	1.953710613263844e-67	2.097105143369405	0.231	0.089	4.900687702311026e-63	Seq_e1.Crh-Scgn
Pcdh17	3.748551101466189e-67	0.9398361679222382	0.723	0.574	9.402865582917788e-63	Seq_e1.Crh-Scgn
Gm31938	9.355521104470744e-67	3.7571669119703066	0.05	0.005	2.3467389138454415e-62	Seq_e1.Crh-Scgn
Dab1	2.7855120903619025e-66	0.9534890813881045	0.628	0.441	6.9871785274637966e-62	Seq_e1.Crh-Scgn
Snd1	4.3010962565636934e-66	1.3729345154833004	0.434	0.256	1.0788869849964369e-61	Seq_e1.Crh-Scgn
Gabrb1	5.3032469172290385e-65	0.6468899557382182	0.885	0.851	1.330266456717732e-60	Seq_e1.Crh-Scgn
Susd1	1.1885275362978447e-63	1.7864791204417576	0.215	0.081	2.9813024720495136e-59	Seq_e1.Crh-Scgn
Ift57	1.4377422110941544e-63	1.8183605279145318	0.345	0.182	3.606432562308577e-59	Seq_e1.Crh-Scgn
Ubash3b	1.0897203768883469e-62	1.553427703487019	0.311	0.148	2.7334545933867295e-58	Seq_e1.Crh-Scgn
Hcrtr2	2.1588555958303297e-61	2.107457448127225	0.193	0.07	5.415273376580798e-57	Seq_e1.Crh-Scgn
Sec24d	6.988191544647124e-61	1.6001492017449659	0.256	0.109	1.7529179670592844e-56	Seq_e1.Crh-Scgn
5730522E02Rik	1.3037367760623042e-60	1.4796930802658943	0.357	0.187	3.270293329074684e-56	Seq_e1.Crh-Scgn
Adcy2	3.37780849156825e-60	1.128602763026401	0.43	0.246	8.472894820249799e-56	Seq_e1.Crh-Scgn
Greb1	3.959892912053154e-59	3.0641845104617578	0.062	0.009	9.932995380594131e-55	Seq_e1.Crh-Scgn
Cntn3	4.50545570339296e-59	1.3821017555630437	0.5	0.341	1.1301485086390901e-54	Seq_e1.Crh-Scgn
Pkib	5.8954288347062e-59	1.307534158341753	0.357	0.187	1.4788093688977032e-54	Seq_e1.Crh-Scgn
Rgs13	7.885036969410006e-59	4.1080203448253805	0.032	0.002	1.9778826734068058e-54	Seq_e1.Crh-Scgn
Rhoj	9.084986758635699e-59	2.1911166133549305	0.107	0.026	2.2788780785361786e-54	Seq_e1.Crh-Scgn
Ncoa1	3.510243509295093e-58	1.2093136898309065	0.536	0.385	8.805094818715811e-54	Seq_e1.Crh-Scgn
Rbms3	1.142051997992022e-57	1.0553972449100724	0.576	0.426	2.8647232317631877e-53	Seq_e1.Crh-Scgn
Gm11417	5.116186291082693e-57	1.8183621793761684	0.22	0.089	1.2833441692551825e-52	Seq_e1.Crh-Scgn
Best3	1.6887136181618561e-56	2.813099064627433	0.055	0.008	4.2359692397971996e-52	Seq_e1.Crh-Scgn
Cadm1	3.926359783789523e-56	0.6924388371089027	0.794	0.736	9.848880881657639e-52	Seq_e1.Crh-Scgn
Calcrl	6.172616067104355e-56	2.377045425207288	0.083	0.017	1.5483390142724563e-51	Seq_e1.Crh-Scgn
Nxph4	9.228089745999066e-56	2.365712047790769	0.124	0.035	2.3147740318864057e-51	Seq_e1.Crh-Scgn
Gpd1	1.0894776009052403e-54	3.1551205385668792	0.046	0.006	2.7328456141107046e-50	Seq_e1.Crh-Scgn
Tmem176b	1.2849831255830874e-54	1.9151752682064314	0.221	0.093	3.2232516722126165e-50	Seq_e1.Crh-Scgn
Dpp6	1.7672156731928095e-54	0.6921408768268873	0.818	0.766	4.432883794636843e-50	Seq_e1.Crh-Scgn
Uncx	1.0352608710104696e-53	2.266904885156403	0.197	0.079	2.596848368842662e-49	Seq_e1.Crh-Scgn
Stxbp5	1.70136258191911e-53	1.2230792274160294	0.453	0.291	4.2676979004858954e-49	Seq_e1.Crh-Scgn
Dgkd	1.728084658824459e-53	1.43486	0.355	0.198	4.334727558195273e-49	Seq_e1.Crh-Scgn
Tmeff1	2.1063572377209573e-53	1.6998418862633635	0.278	0.137	5.283586495099249e-49	Seq_e1.Crh-Scgn
4930441H08Rik	2.3283733661049064e-53	5.939966285969487	0.017	0	5.8404917515375476e-49	Seq_e1.Crh-Scgn
Klc3	5.863357924375409e-53	3.0764288821525776	0.048	0.006	1.4707647017503276e-48	Seq_e1.Crh-Scgn
Fuca1	1.3230822084960683e-52	1.6059651820254168	0.327	0.178	3.318819411791538e-48	Seq_e1.Crh-Scgn
Fam78b	1.5023621736722178e-52	1.9741140107952644	0.169	0.062	3.768525276439391e-48	Seq_e1.Crh-Scgn
Cxcl2	2.1760749770302083e-52	7.771758727761082	0.015	0	5.458466472382575e-48	Seq_e1.Crh-Scgn
Hipk2	3.680177762047661e-52	1.5149101857172147	0.338	0.188	9.231357898320353e-48	Seq_e1.Crh-Scgn
Cacna2d1	1.0261733417974653e-51	0.6168337347882242	0.764	0.654	2.574053210564762e-47	Seq_e1.Crh-Scgn
Nebl	1.049321937699767e-51	1.0375454333275347	0.588	0.46	2.6321191485260954e-47	Seq_e1.Crh-Scgn
Usp29	1.2988325831996093e-51	0.7959274322730834	0.757	0.685	3.2579916516979e-47	Seq_e1.Crh-Scgn
Sh3rf1	1.219993878344868e-50	1.3360892483244782	0.349	0.194	3.0602326444402666e-46	Seq_e1.Crh-Scgn
Mdm1	1.5049276774449638e-50	1.8458560874885686	0.187	0.074	3.774960586102947e-46	Seq_e1.Crh-Scgn
4930505G20Rik	1.886969745561391e-50	3.887369200840165	0.039	0.004	4.733274909766193e-46	Seq_e1.Crh-Scgn
Gpx7	2.596346937544957e-50	2.164944316756147	0.131	0.041	6.51267665813777e-46	Seq_e1.Crh-Scgn
Dclk1	1.5334207318438729e-49	0.7670614050038891	0.709	0.607	3.846432563757171e-45	Seq_e1.Crh-Scgn
Myrip	2.2651887057295808e-48	1.5741578174163977	0.322	0.178	5.68199934945208e-44	Seq_e1.Crh-Scgn
Atrnl1	7.955940345230102e-48	1.327642383997912	0.416	0.271	1.9956680761975186e-43	Seq_e1.Crh-Scgn
Gm43519	2.8021813799384754e-47	5.75435	0.017	0	7.0289917734376714e-43	Seq_e1.Crh-Scgn
Bdkrb2	7.127956928609104e-47	3.092809839552694	0.05	0.008	1.7879767159723075e-42	Seq_e1.Crh-Scgn
Pou3f4	8.700634699697736e-47	2.4392501735912546	0.101	0.028	2.18246720807218e-42	Seq_e1.Crh-Scgn
Ctnnd2	9.586766863344166e-47	0.6701241240919655	0.768	0.695	2.4047446000012507e-42	Seq_e1.Crh-Scgn
Ptprn	2.032096650692727e-46	0.8058094113618313	0.651	0.549	5.097311238597636e-42	Seq_e1.Crh-Scgn
Mgat4c	2.7831041472569737e-46	0.6085418235706075	0.631	0.464	6.981138442979393e-42	Seq_e1.Crh-Scgn
Setd7	6.858595064954077e-46	1.2652694312772057	0.396	0.25	1.7204099860930805e-41	Seq_e1.Crh-Scgn
Nectin1	9.218000135815915e-46	1.7784540614901858	0.198	0.085	2.312243154068064e-41	Seq_e1.Crh-Scgn
Rasgrf1	1.486356373488342e-45	0.48219988572425576	0.839	0.732	3.728376327258157e-41	Seq_e1.Crh-Scgn
E230001N04Rik	2.0293012156348292e-45	2.1239807617822652	0.099	0.027	5.090299169298406e-41	Seq_e1.Crh-Scgn
Mcc	2.87107588218042e-45	1.3471596940176798	0.199	0.084	7.201806742861365e-41	Seq_e1.Crh-Scgn
Plxnd1	3.672548484688716e-45	2.8157128834404235	0.075	0.017	9.212220618993176e-41	Seq_e1.Crh-Scgn
Grin3a	4.044525600931148e-45	1.0125393454515619	0.527	0.381	1.0145288017375691e-40	Seq_e1.Crh-Scgn
Zim1	1.7047968287947118e-44	1.42776	0.249	0.119	4.276312365348655e-40	Seq_e1.Crh-Scgn
Gm3764	3.022350107095109e-44	1.3835858159964594	0.207	0.09	7.58126300863737e-40	Seq_e1.Crh-Scgn
Tmtc2	4.0378965524553777e-44	1.08418	0.401	0.247	1.0128659712179069e-39	Seq_e1.Crh-Scgn
Myb	4.1583013720824584e-44	2.72315	0.055	0.01	1.0430683161731639e-39	Seq_e1.Crh-Scgn
Cep83	1.3832542315635678e-43	1.1957565270985095	0.415	0.267	3.469754914454054e-39	Seq_e1.Crh-Scgn
1810034E14Rik	1.6403280318920391e-43	1.661238261168916	0.203	0.09	4.1145988351979907e-39	Seq_e1.Crh-Scgn
Pld5	2.601585821251982e-43	1.0439842949639637	0.401	0.244	6.525817874028472e-39	Seq_e1.Crh-Scgn
Gm47595	2.629509879608697e-43	6.805095556514042	0.012	0	6.595862582010456e-39	Seq_e1.Crh-Scgn
Cdh4	1.248737353385917e-42	0.9487700045479089	0.406	0.251	3.132332777233234e-38	Seq_e1.Crh-Scgn
Negr1	1.2923124282650233e-42	0.6304521040012676	0.79	0.719	3.2416364950599845e-38	Seq_e1.Crh-Scgn
Magt1	1.338990755533233e-42	1.5775202812932005	0.196	0.085	3.3587244111795616e-38	Seq_e1.Crh-Scgn
Slc2a13	2.425199727986823e-42	1.0656119745824906	0.464	0.321	6.083370997682147e-38	Seq_e1.Crh-Scgn
Gm45881	2.669808913510167e-42	1.780224895490048	0.218	0.104	6.696948678648903e-38	Seq_e1.Crh-Scgn
Fkbp11	3.167739753525394e-42	2.319638320888057	0.117	0.038	7.945958397743099e-38	Seq_e1.Crh-Scgn
Magi2	5.457481238402096e-42	0.6959936881629654	0.818	0.77	1.3689545938407817e-37	Seq_e1.Crh-Scgn
Kif17	5.712727464332587e-42	1.292833235211707	0.268	0.137	1.4329805571531861e-37	Seq_e1.Crh-Scgn
Ssh2	1.3886881520265596e-41	0.7241086683605553	0.698	0.614	3.483385360543422e-37	Seq_e1.Crh-Scgn
Dock10	2.406127122553842e-41	1.101370462898044	0.429	0.285	6.035529274214058e-37	Seq_e1.Crh-Scgn
Gm22146	3.768667253890041e-41	3.5220864285624813	0.029	0.003	9.45332493965778e-37	Seq_e1.Crh-Scgn
Ryr1	7.851476981675364e-41	1.6870771882983084	0.159	0.063	1.9694644860834483e-36	Seq_e1.Crh-Scgn
Gnas	8.442826670527086e-41	0.44998737431443825	0.962	0.9	2.117798642035014e-36	Seq_e1.Crh-Scgn
Tmtc4	2.4276595531579702e-40	1.5481187227135451	0.249	0.128	6.089541223141452e-36	Seq_e1.Crh-Scgn
Gm42809	5.278138532490128e-40	5.539498261799704	0.014	0	1.3239682694898237e-35	Seq_e1.Crh-Scgn
Peak1	5.3687044219954165e-40	1.4319597202565826	0.27	0.146	1.3466858172133302e-35	Seq_e1.Crh-Scgn
Vat1l	5.238915307319354e-39	0.9665912356975693	0.482	0.352	1.3141295156879867e-34	Seq_e1.Crh-Scgn
Hs3st2	6.241433841553423e-39	2.447553810935421	0.071	0.017	1.5656012648152606e-34	Seq_e1.Crh-Scgn
Mast4	1.0976724235079699e-38	0.8078039602829039	0.563	0.429	2.7534015071273917e-34	Seq_e1.Crh-Scgn
Hoga1	1.1038084890099707e-38	1.8418858403560203	0.105	0.034	2.7687932138326106e-34	Seq_e1.Crh-Scgn
Gm48700	1.2216206136766847e-38	3.0918621264285533	0.037	0.005	3.064313147346596e-34	Seq_e1.Crh-Scgn
Eml5	1.235726841811297e-38	0.7575192031369418	0.641	0.517	3.0996972099994575e-34	Seq_e1.Crh-Scgn
Lrrtm3	3.662684001131332e-38	0.999204	0.529	0.404	9.187476548437833e-34	Seq_e1.Crh-Scgn
Gm43122	5.897459400968064e-38	2.244946345414899	0.071	0.018	1.4793187161388291e-33	Seq_e1.Crh-Scgn
Plcxd3	1.0168200946832797e-37	1.3293637903317344	0.412	0.289	2.550591525503539e-33	Seq_e1.Crh-Scgn
Cdh9	2.838166739985457e-37	1.150220097097155	0.264	0.14	7.119257450579521e-33	Seq_e1.Crh-Scgn
Slc35f3	4.9734610085484166e-37	1.4047510239486045	0.346	0.221	1.2475429593842848e-32	Seq_e1.Crh-Scgn
Sct	7.252680277472674e-37	3.96209	0.032	0.004	1.8192623208012456e-32	Seq_e1.Crh-Scgn
Gm34354	8.929112352783242e-37	3.8126944489211194	0.022	0.002	2.2397785425721484e-32	Seq_e1.Crh-Scgn
Vegfa	9.620974618833817e-37	1.910358618885453	0.192	0.091	2.4133252733882744e-32	Seq_e1.Crh-Scgn
Chil1	1.0159825169493104e-36	2.6915761697806135	0.048	0.009	2.54849054551565e-32	Seq_e1.Crh-Scgn
AW551984	1.3174379884123882e-36	1.1886869545009275	0.343	0.213	3.304661450133635e-32	Seq_e1.Crh-Scgn
Fosb	1.4000697305575492e-36	3.1475438094910877	0.048	0.009	3.5119349121305564e-32	Seq_e1.Crh-Scgn
Pld1	3.128684630160243e-36	2.4845486987497667	0.064	0.015	7.847992526293954e-32	Seq_e1.Crh-Scgn
Gabrg2	3.642951549992695e-36	0.8952951521568202	0.628	0.539	9.137979668001676e-32	Seq_e1.Crh-Scgn
Gm44593	2.0874016688964688e-35	1.5835214214552502	0.13	0.049	5.236038346259902e-31	Seq_e1.Crh-Scgn
Nr4a1	2.743278728437331e-35	2.7202620128007013	0.077	0.022	6.881240362412201e-31	Seq_e1.Crh-Scgn
Gm43670	3.310680927510217e-35	1.4652241407433797	0.084	0.025	8.304512038566628e-31	Seq_e1.Crh-Scgn
Pla2r1	3.8629012794322315e-35	2.239646823524021	0.056	0.012	9.68970156932781e-31	Seq_e1.Crh-Scgn
Tmem178b	4.814876930120873e-35	0.8652311501127101	0.579	0.482	1.2077637291515196e-30	Seq_e1.Crh-Scgn
Cavin4	5.219671481057924e-35	2.679848946636483	0.056	0.013	1.3093023943085697e-30	Seq_e1.Crh-Scgn
Lpcat2	5.618577597072559e-35	1.3506352773983608	0.193	0.09	1.4093640044496807e-30	Seq_e1.Crh-Scgn
Hrh1	6.811294377361866e-35	2.0402584448028174	0.141	0.058	1.7085450816174504e-30	Seq_e1.Crh-Scgn
Ly75	9.031495987650182e-35	1.7742839017365495	0.069	0.018	2.2654604535421717e-30	Seq_e1.Crh-Scgn
Fkbp5	1.5483573148390416e-34	1.5033253505789772	0.221	0.115	3.883899488542252e-30	Seq_e1.Crh-Scgn
Fat1	1.9266346624194127e-34	1.8869186683271608	0.149	0.063	4.8327703872128546e-30	Seq_e1.Crh-Scgn
Eif2ak3	2.096776152028562e-34	1.7783514482208056	0.186	0.089	5.259553299748445e-30	Seq_e1.Crh-Scgn
Lcorl	2.2949306061450503e-34	0.6691735882112814	0.502	0.356	5.756603932454244e-30	Seq_e1.Crh-Scgn
Spock1	2.808679465979016e-34	0.7319389728534724	0.574	0.456	7.045291572461764e-30	Seq_e1.Crh-Scgn
Vstm2b	2.8172644092836887e-34	1.7905436192221238	0.166	0.075	7.066826044247204e-30	Seq_e1.Crh-Scgn
Gal	4.602745462376478e-34	1.570211277751332	0.118	0.044	1.1545526717825158e-29	Seq_e1.Crh-Scgn
Antxr2	7.431858397843554e-34	2.3391027516304197	0.057	0.013	1.864207360515077e-29	Seq_e1.Crh-Scgn
Fign	8.677683570449512e-34	1.051681720815508	0.266	0.146	2.1767101468115557e-29	Seq_e1.Crh-Scgn
Cntnap5a	9.234037247783182e-34	0.7894370784158031	0.557	0.441	2.3162659032339334e-29	Seq_e1.Crh-Scgn
Gm28307	1.2733172593364935e-33	2.0315566808522596	0.073	0.02	3.19398901331966e-29	Seq_e1.Crh-Scgn
Zcchc11	2.0542840927329446e-33	0.904114	0.553	0.46	5.152966218211318e-29	Seq_e1.Crh-Scgn
Zdbf2	2.1609872970111435e-33	0.9656466225084199	0.488	0.372	5.420620535822753e-29	Seq_e1.Crh-Scgn
Adarb2	2.2358732164261397e-33	0.7532211047120863	0.435	0.293	5.608464376083329e-29	Seq_e1.Crh-Scgn
Tmem229b	2.9138217766775155e-33	1.6973802687270687	0.156	0.069	7.30903054461788e-29	Seq_e1.Crh-Scgn
Egr1	4.839735749340234e-33	2.0878085288544286	0.18	0.087	1.2139993153645042e-28	Seq_e1.Crh-Scgn
Kcnmb4	6.381655087547111e-33	1.553404463269577	0.174	0.081	1.6007743621603174e-28	Seq_e1.Crh-Scgn
Clvs1	9.343750122115453e-33	1.1110630570215172	0.48	0.388	2.3437862806314403e-28	Seq_e1.Crh-Scgn
Wscd2	1.0239016904124584e-32	1.385483230621773	0.256	0.145	2.5683550002306107e-28	Seq_e1.Crh-Scgn
Igf1r	1.4582106075250552e-32	1.1212721275610282	0.398	0.279	3.6577754879158482e-28	Seq_e1.Crh-Scgn
Tnpo1	2.247924128083061e-32	0.9293444318972495	0.353	0.224	5.638692882883551e-28	Seq_e1.Crh-Scgn
Sstr1	2.615426335567263e-32	1.9318996754464148	0.136	0.057	6.5605354201369226e-28	Seq_e1.Crh-Scgn
Snhg11	3.879848057991298e-32	0.4582219070755045	0.994	0.991	9.732210868665372e-28	Seq_e1.Crh-Scgn
Vgll3	4.3863846500224627e-32	2.107110057024633	0.064	0.017	1.1002807256116345e-27	Seq_e1.Crh-Scgn
Kcna5	4.950797514540612e-32	2.614862427288948	0.075	0.022	1.241858048547367e-27	Seq_e1.Crh-Scgn
Tmem219	6.583521251823797e-32	1.356706692730286	0.268	0.156	1.6514104708074814e-27	Seq_e1.Crh-Scgn
Thsd7a	7.833584998337922e-32	1.1353585291112234	0.298	0.178	1.9649764609830844e-27	Seq_e1.Crh-Scgn
Cacna1c	8.425216987501788e-32	0.8193919306377901	0.551	0.454	2.1133814291449483e-27	Seq_e1.Crh-Scgn
Gm30332	9.652079890271206e-32	3.283248328033336	0.022	0.002	2.4211277196756294e-27	Seq_e1.Crh-Scgn
Dscam	2.9245957425875887e-31	0.7188420009083307	0.662	0.579	7.336055960706708e-27	Seq_e1.Crh-Scgn
Gm807	3.3278418266578836e-31	4.691823300945497	0.012	0	8.347558437988635e-27	Seq_e1.Crh-Scgn
Edn3	3.8152693063550693e-31	3.376579132440319	0.022	0.002	9.570221528061055e-27	Seq_e1.Crh-Scgn
Arfgef3	4.34696859165913e-31	0.6946615783349799	0.629	0.542	1.0903936015317761e-26	Seq_e1.Crh-Scgn
Gm37229	4.603377777095468e-31	2.068354504828392	0.062	0.016	1.1547112816066272e-26	Seq_e1.Crh-Scgn
Mcu	9.067598574445648e-31	1.2622570309786905	0.296	0.184	2.2745164264139465e-26	Seq_e1.Crh-Scgn
Gns	9.557904688488477e-31	1.2195298370050682	0.362	0.251	2.3975048120604496e-26	Seq_e1.Crh-Scgn
Lrrc4	1.1320037263041106e-30	1.2130655648142858	0.311	0.196	2.839518147061231e-26	Seq_e1.Crh-Scgn
Neurod2	2.055099755469203e-30	2.6156743731986687	0.036	0.006	5.155012226618949e-26	Seq_e1.Crh-Scgn
Trim25	2.5901254389619184e-30	2.0871343583392914	0.051	0.012	6.497070651092076e-26	Seq_e1.Crh-Scgn
Xkr6	4.204228246243532e-30	0.8569443893695576	0.367	0.238	1.0545886132877276e-25	Seq_e1.Crh-Scgn
N4bp2	4.696414858331053e-30	1.0593427545932321	0.324	0.203	1.1780487030637613e-25	Seq_e1.Crh-Scgn
Kcnq3	5.9213811286584736e-30	0.879663	0.548	0.453	1.4853192423126914e-25	Seq_e1.Crh-Scgn
Gm42772	8.136386741869322e-30	1.793179139904499	0.059	0.015	2.0409312503305006e-25	Seq_e1.Crh-Scgn
Tmem255a	8.233145892201797e-30	0.8425586861517282	0.423	0.296	2.0652023155998987e-25	Seq_e1.Crh-Scgn
Klhdc10	2.1117171827001496e-29	0.794536	0.522	0.415	5.297031381085056e-25	Seq_e1.Crh-Scgn
Ptprn2	2.762337601562899e-29	0.6234715365564796	0.688	0.655	6.929047639760376e-25	Seq_e1.Crh-Scgn
Trib1	3.098566544821788e-29	3.193269397522901	0.036	0.006	7.772444321030973e-25	Seq_e1.Crh-Scgn
Atp8a1	3.56831337420902e-29	0.6708266288091986	0.594	0.503	8.950757267865907e-25	Seq_e1.Crh-Scgn
Tbc1d8b	5.791928948146672e-29	2.79806	0.043	0.009	1.4528474573531114e-24	Seq_e1.Crh-Scgn
Diaph3	6.98125929320688e-29	1.6663915496277522	0.123	0.051	1.7511790811080138e-24	Seq_e1.Crh-Scgn
Tmem176a	1.3379335205509744e-28	1.7430941871964034	0.14	0.063	3.356072442950064e-24	Seq_e1.Crh-Scgn
Cpt1a	1.89885254757311e-28	2.746101907419691	0.039	0.008	4.763081730332389e-24	Seq_e1.Crh-Scgn
Ube2e2	2.3268231026191197e-28	0.7918455575953016	0.551	0.469	5.8366030706098e-24	Seq_e1.Crh-Scgn
Npas4	2.495683408919814e-28	2.1787482470954953	0.083	0.028	6.260172262934461e-24	Seq_e1.Crh-Scgn
Dgkk	3.191313534085302e-28	1.508791299178117	0.172	0.085	8.005090868899571e-24	Seq_e1.Crh-Scgn
Gm17057	3.4470499383914406e-28	3.3614582031286138	0.025	0.003	8.64658006546109e-24	Seq_e1.Crh-Scgn
Rnf169	4.551101047763712e-28	1.3031003594923434	0.343	0.237	1.1415981868210494e-23	Seq_e1.Crh-Scgn
Gm20696	6.840259342433642e-28	1.0994035743931212	0.277	0.168	1.7158106534560547e-23	Seq_e1.Crh-Scgn
Dapk1	1.0980862952397536e-27	0.9380892080766965	0.427	0.321	2.754439662979398e-23	Seq_e1.Crh-Scgn
Spsb1	1.3220438198134102e-27	2.6582702903329816	0.029	0.005	3.3162147176199583e-23	Seq_e1.Crh-Scgn
Agap1	1.3464091077641885e-27	0.9082269802755013	0.461	0.366	3.3773326059156903e-23	Seq_e1.Crh-Scgn
Cxcl1	1.5769423407779352e-27	5.11227	0.014	0.001	3.955602167607373e-23	Seq_e1.Crh-Scgn
Hacd3	2.351724691357261e-27	0.743048	0.566	0.474	5.899066215800554e-23	Seq_e1.Crh-Scgn
Megf10	3.468930070857612e-27	2.0554127361402412	0.044	0.01	8.701464189739234e-23	Seq_e1.Crh-Scgn
Trpc5os	3.8131000123340955e-27	2.0628884237645266	0.055	0.014	9.564780070938845e-23	Seq_e1.Crh-Scgn
Unc5d	1.1070919218821716e-26	0.3934437497339738	0.546	0.415	2.7770293768492392e-22	Seq_e1.Crh-Scgn
Gm29530	1.3568954481245144e-26	3.1780576110903134	0.024	0.003	3.403636542075532e-22	Seq_e1.Crh-Scgn
Adra1b	1.5080889010091779e-26	1.9851866859721343	0.12	0.052	3.7828901992914217e-22	Seq_e1.Crh-Scgn
Ctnna3	1.7733256924369102e-26	1.0578969202785224	0.456	0.359	4.448210166908745e-22	Seq_e1.Crh-Scgn
Egfem1	2.440065772646243e-26	0.7868640272601148	0.456	0.338	6.120660984105836e-22	Seq_e1.Crh-Scgn
Il6ra	2.563178684911927e-26	2.5442310596700146	0.035	0.007	6.429477413233078e-22	Seq_e1.Crh-Scgn
Klhl29	2.6956003072349697e-26	0.725387	0.443	0.319	6.761643810668198e-22	Seq_e1.Crh-Scgn
Wdsub1	5.3875874372499e-26	1.4986177470132902	0.19	0.103	1.3514224327597649e-21	Seq_e1.Crh-Scgn
Fam155a	6.137405148633794e-26	0.5717820843295462	0.764	0.735	1.539506707483301e-21	Seq_e1.Crh-Scgn
Hs6st3	1.2644430077197848e-25	0.7217532331849252	0.416	0.292	3.1717288405643083e-21	Seq_e1.Crh-Scgn
Nsun7	1.4329195842757877e-25	0.8215206446334917	0.397	0.276	3.5943354851973856e-21	Seq_e1.Crh-Scgn
Kcnk2	1.5610337784487081e-25	1.050318438277299	0.388	0.291	3.915697129860739e-21	Seq_e1.Crh-Scgn
Adgrl2	1.896247988154322e-25	0.8769731038026317	0.406	0.298	4.756548453486302e-21	Seq_e1.Crh-Scgn
9630014M24Rik	2.356092405324327e-25	2.304013036402501	0.043	0.01	5.910022189515541e-21	Seq_e1.Crh-Scgn
Ercc5	3.5342148058578087e-25	1.4195773690436724	0.25	0.153	8.865224419013727e-21	Seq_e1.Crh-Scgn
Gm12120	3.5478262493540453e-25	1.8179873680648142	0.075	0.025	8.899367363879687e-21	Seq_e1.Crh-Scgn
Dhx40	3.632629001258313e-25	1.1671973259082657	0.281	0.182	9.112086586756351e-21	Seq_e1.Crh-Scgn
4930587E11Rik	3.74471716061196e-25	1.2166074288574085	0.163	0.081	9.39324852567904e-21	Seq_e1.Crh-Scgn
Tmed3	4.325791583879034e-25	1.788658913098486	0.239	0.152	1.085081560900217e-20	Seq_e1.Crh-Scgn
5330429C05Rik	4.517677560376217e-25	2.340955201638025	0.034	0.007	1.1332142392447703e-20	Seq_e1.Crh-Scgn
Rev3l	5.889080361612056e-25	0.6330674436867663	0.57	0.478	1.477216917906768e-20	Seq_e1.Crh-Scgn
Sult5a1	8.646593751941845e-25	4.334288152472258	0.012	0.001	2.1689115767370922e-20	Seq_e1.Crh-Scgn
Igfbpl1	1.020876687748763e-24	2.5082169649167247	0.044	0.011	2.560767083548997e-20	Seq_e1.Crh-Scgn
Phf8	1.2537433523707153e-24	1.2387817766180975	0.27	0.173	3.1448898250867023e-20	Seq_e1.Crh-Scgn
Sorbs1	1.3016113749941145e-24	0.7949003098100664	0.447	0.339	3.2649619730352365e-20	Seq_e1.Crh-Scgn
Ubr5	1.3815405512292096e-24	0.9341860736874317	0.448	0.362	3.465456318703349e-20	Seq_e1.Crh-Scgn
Tiparp	1.7321956588234024e-24	1.819040069249803	0.143	0.07	4.3450395905926226e-20	Seq_e1.Crh-Scgn
Sowaha	2.6047138795805813e-24	2.0469412218555205	0.116	0.052	6.533664295539931e-20	Seq_e1.Crh-Scgn
Gm2861	3.367305986325744e-24	3.421714732396917	0.017	0.002	8.446550336099497e-20	Seq_e1.Crh-Scgn
Ncoa2	3.4114145196975514e-24	0.8558151882630529	0.416	0.312	8.557192181209338e-20	Seq_e1.Crh-Scgn
Ubxn4	3.421995985708818e-24	0.6472422941796327	0.658	0.609	8.583734730551999e-20	Seq_e1.Crh-Scgn
5330434G04Rik	4.3300786869155225e-24	0.4673500506756918	0.679	0.605	1.0861569378258897e-19	Seq_e1.Crh-Scgn
Baiap3	5.597294377480898e-24	0.6204517556806419	0.568	0.461	1.4040253216473083e-19	Seq_e1.Crh-Scgn
Nfkbiz	6.150397054953681e-24	1.823253849344166	0.063	0.02	1.5427655972645813e-19	Seq_e1.Crh-Scgn
Gm17922	8.628793264752514e-24	2.1980506718549497	0.045	0.011	2.1644465025305207e-19	Seq_e1.Crh-Scgn
Arhgap18	9.373345190352123e-24	1.0381462327502273	0.319	0.215	2.3512099075479267e-19	Seq_e1.Crh-Scgn
Apbb3	1.1745604509511022e-23	2.180837175652305	0.043	0.01	2.9462674351657447e-19	Seq_e1.Crh-Scgn
Dip2c	1.2301709720273105e-23	0.8517083763911575	0.476	0.393	3.085760866233306e-19	Seq_e1.Crh-Scgn
Slc39a11	1.9038883539111427e-23	1.463856273473353	0.173	0.093	4.77571354695071e-19	Seq_e1.Crh-Scgn
Akap7	2.242087653268054e-23	1.0497783992451588	0.323	0.223	5.624052669457587e-19	Seq_e1.Crh-Scgn
Wdfy3	2.783429347084769e-23	0.738196	0.512	0.416	6.981954174227435e-19	Seq_e1.Crh-Scgn
Nrn1	4.070770324629242e-23	0.9551031538204025	0.427	0.327	1.0211120282299992e-18	Seq_e1.Crh-Scgn
Ank3	4.130009786943084e-23	0.39944418519123515	0.834	0.819	1.0359716549568033e-18	Seq_e1.Crh-Scgn
Galnt10	5.447696232427705e-23	1.3442412595554492	0.128	0.06	1.3665001229421656e-18	Seq_e1.Crh-Scgn
Eda	8.595396773649677e-23	1.1230228684073862	0.253	0.158	2.156069326702285e-18	Seq_e1.Crh-Scgn
A230077H06Rik	1.1064577080097086e-22	1.763760025928712	0.073	0.026	2.775438514771553e-18	Seq_e1.Crh-Scgn
Dera	1.1747182889911916e-22	1.7375441727411443	0.077	0.028	2.946663356105505e-18	Seq_e1.Crh-Scgn
Runx1t1	1.210723783936703e-22	0.8504869936720756	0.399	0.294	3.0369795396268257e-18	Seq_e1.Crh-Scgn
Ckmt2	1.4775944116257478e-22	1.7577374565287647	0.067	0.023	3.7063978221220255e-18	Seq_e1.Crh-Scgn
P2rx7	1.7377421177989142e-22	2.885775148183013	0.024	0.004	4.358952328286796e-18	Seq_e1.Crh-Scgn
Svil	2.126533429212943e-22	1.42994	0.096	0.039	5.334196453837746e-18	Seq_e1.Crh-Scgn
Elmo1	2.43065056314681e-22	0.7900748866136713	0.469	0.379	6.097043872597458e-18	Seq_e1.Crh-Scgn
Gpr165	2.525435719521476e-22	1.7010744895434016	0.105	0.046	6.334802958847671e-18	Seq_e1.Crh-Scgn
Ston1	2.9192080371438045e-22	2.6947920351633736	0.036	0.008	7.322541440371519e-18	Seq_e1.Crh-Scgn
Daam2	3.1484683238244117e-22	2.878142897393815	0.026	0.005	7.897617943481154e-18	Seq_e1.Crh-Scgn
Klhl2	3.3008046283994684e-22	1.2489703094658842	0.239	0.15	8.279738329877226e-18	Seq_e1.Crh-Scgn
Kalrn	4.5996744018226375e-22	0.6602912256535056	0.536	0.449	1.1537823269531903e-17	Seq_e1.Crh-Scgn
Trio	5.098699066142755e-22	0.7262645150778009	0.468	0.371	1.2789576737512486e-17	Seq_e1.Crh-Scgn
Mest	5.115101932564239e-22	1.0272250871643787	0.312	0.216	1.2830721687644137e-17	Seq_e1.Crh-Scgn
Acss1	6.106214698505433e-22	2.5841426285112967	0.035	0.008	1.531682894973103e-17	Seq_e1.Crh-Scgn
Dnah5	7.550674674399114e-22	1.5543378213038193	0.091	0.037	1.8940112353262736e-17	Seq_e1.Crh-Scgn
Bbx	8.297197307814348e-22	0.9900301118640427	0.34	0.245	2.081268972692151e-17	Seq_e1.Crh-Scgn
Prdm8	1.0131819806197998e-21	2.0074233912414163	0.084	0.033	2.541465680186706e-17	Seq_e1.Crh-Scgn
Adcy5	1.0492122173030056e-21	1.1855698843798541	0.233	0.145	2.6318439258828592e-17	Seq_e1.Crh-Scgn
Gm42583	1.169435354416095e-21	1.6972882417072892	0.06	0.019	2.933411643017333e-17	Seq_e1.Crh-Scgn
Ahnak2	1.2118091689490107e-21	2.6260589977734417	0.043	0.012	3.0397021193916986e-17	Seq_e1.Crh-Scgn
Gm15518	1.4583822825180667e-21	2.0839453760773434	0.049	0.014	3.6582061174683184e-17	Seq_e1.Crh-Scgn
Dlgap2	1.6913367711132723e-21	0.7388133207289449	0.427	0.323	4.242549156660532e-17	Seq_e1.Crh-Scgn
Ece1	1.851020545928051e-21	1.074603236099781	0.294	0.204	4.643099937405923e-17	Seq_e1.Crh-Scgn
Pde4d	2.1513519731779398e-21	0.9158462493042525	0.694	0.691	5.396451289519544e-17	Seq_e1.Crh-Scgn
Astn1	2.2249014560120674e-21	0.6446448238081554	0.534	0.456	5.58094281226067e-17	Seq_e1.Crh-Scgn
Ostc	2.262642127432401e-21	1.0863814318164076	0.355	0.267	5.675611512451434e-17	Seq_e1.Crh-Scgn
Sipa1l1	2.4360383800590976e-21	0.9228358246811863	0.302	0.206	6.11055867254024e-17	Seq_e1.Crh-Scgn
Rmst	2.4652076927722756e-21	1.3733205121067322	0.129	0.062	6.183726976549976e-17	Seq_e1.Crh-Scgn
Mid1	2.8783438870392684e-21	0.9780587799518106	0.195	0.11	7.2200378062493e-17	Seq_e1.Crh-Scgn
Gm26672	4.413603175013083e-21	1.2941588876551975	0.174	0.096	1.1071082204202819e-16	Seq_e1.Crh-Scgn
Mical2	4.78569352971062e-21	1.066248546237759	0.287	0.193	1.200443364992612e-16	Seq_e1.Crh-Scgn
Fosl2	5.01881189917684e-21	2.284039988612082	0.048	0.014	1.2589187767895186e-16	Seq_e1.Crh-Scgn
Zfp516	6.293540350743858e-21	1.5959334358859842	0.094	0.04	1.5786716615805893e-16	Seq_e1.Crh-Scgn
Dok6	6.423521387637663e-21	0.6685123606541935	0.459	0.353	1.6112761048750313e-16	Seq_e1.Crh-Scgn
Tnfrsf23	9.142537815425802e-21	2.2496303706544745	0.035	0.008	2.293314185621408e-16	Seq_e1.Crh-Scgn
Dpyd	9.356612812054471e-21	0.5020739653468071	0.404	0.289	2.3470127577757434e-16	Seq_e1.Crh-Scgn
Slit3	1.1104434952633166e-20	0.7152607884965702	0.311	0.207	2.7854364635185034e-16	Seq_e1.Crh-Scgn
Gm13266	1.3849787158046753e-20	3.3283324676355868	0.015	0.002	3.474080610724448e-16	Seq_e1.Crh-Scgn
Gm11418	1.6097370603286166e-20	0.9622284576247674	0.173	0.094	4.0378644421283017e-16	Seq_e1.Crh-Scgn
Cyp4v3	1.7073957490975047e-20	2.4027003021171423	0.029	0.006	4.2828314970361806e-16	Seq_e1.Crh-Scgn
Trim35	1.760746831579635e-20	0.8513689788557439	0.447	0.373	4.416657352334357e-16	Seq_e1.Crh-Scgn
Adamts1	1.901880681082771e-20	2.5268274593532123	0.033	0.008	4.770677500428023e-16	Seq_e1.Crh-Scgn
Sik1	2.635209541367362e-20	1.9718213518150838	0.079	0.031	6.610159613565891e-16	Seq_e1.Crh-Scgn
Elovl5	3.667087386682244e-20	1.4094832116568883	0.192	0.114	9.19852200075374e-16	Seq_e1.Crh-Scgn
Ifi35	3.7096082967989436e-20	1.7531417149729425	0.055	0.018	9.30518145169047e-16	Seq_e1.Crh-Scgn
Rasd1	4.8452409269425084e-20	1.8900595794007673	0.135	0.071	1.2153802341142589e-15	Seq_e1.Crh-Scgn
Slc44a5	4.9751755806899864e-20	1.050842464193484	0.208	0.124	1.2479730426602761e-15	Seq_e1.Crh-Scgn
Atf5	6.179885329563296e-20	1.7327696196221472	0.068	0.025	1.550162436067657e-15	Seq_e1.Crh-Scgn
Arhgef28	8.827128846198455e-20	1.209406045616719	0.326	0.244	2.2141969997804203e-15	Seq_e1.Crh-Scgn
March8	1.0808511859510964e-19	0.8660508566274789	0.247	0.156	2.71120711483973e-15	Seq_e1.Crh-Scgn
Abtb2	1.0871434635308357e-19	2.0982569802399174	0.047	0.014	2.7269906639207484e-15	Seq_e1.Crh-Scgn
Nktr	1.2192786145363845e-19	0.4827610013852839	0.753	0.715	3.058438476703067e-15	Seq_e1.Crh-Scgn
Nf2	2.3840590807292103e-19	1.2802871913975935	0.221	0.141	5.980173798101151e-15	Seq_e1.Crh-Scgn
9630041A04Rik	3.060663553273142e-19	2.061279938064314	0.046	0.014	7.67736845703035e-15	Seq_e1.Crh-Scgn
Pappa	3.2746161834545136e-19	2.2268092475500767	0.052	0.017	8.214047234577301e-15	Seq_e1.Crh-Scgn
Gm44148	3.3650594153153012e-19	1.4671052083945044	0.083	0.034	8.440915037376901e-15	Seq_e1.Crh-Scgn
Flacc1	3.579639434500064e-19	3.753104745604505	0.013	0.001	8.979167557499961e-15	Seq_e1.Crh-Scgn
Cacng2	5.500303854909736e-19	0.8427211730886739	0.432	0.354	1.3796962189655581e-14	Seq_e1.Crh-Scgn
1700087M22Rik	5.965798401120585e-19	2.384555944974104	0.028	0.006	1.4964608709370876e-14	Seq_e1.Crh-Scgn
Nav2	6.682215576453719e-19	0.6203134355075732	0.523	0.447	1.6761669551976507e-14	Seq_e1.Crh-Scgn
Malat1	7.014072682992596e-19	0.37075954021742774	0.998	0.996	1.7594099918018628e-14	Seq_e1.Crh-Scgn
C230086J09Rik	7.601046577362408e-19	1.9157936402289675	0.042	0.012	1.9066465234655865e-14	Seq_e1.Crh-Scgn
Atxn7l1	8.028435240530017e-19	0.8597041420094795	0.353	0.263	2.0138526957345496e-14	Seq_e1.Crh-Scgn
4930419G24Rik	9.90035572499749e-19	1.0674487352493336	0.152	0.082	2.4834052300583703e-14	Seq_e1.Crh-Scgn
Cop1	1.3601664456088603e-18	1.614220693793628	0.085	0.036	3.411841512165265e-14	Seq_e1.Crh-Scgn
Vcl	1.7201185268273833e-18	1.1987284728871619	0.168	0.096	4.3147453126938084e-14	Seq_e1.Crh-Scgn
Itgb6	1.800993597178466e-18	2.6530377613740015	0.022	0.004	4.5176123391624645e-14	Seq_e1.Crh-Scgn
2900064K03Rik	1.849738085447476e-18	1.547508796025081	0.05	0.016	4.6398830135364485e-14	Seq_e1.Crh-Scgn
Tut4	2.2243388557643732e-18	1.3485995198758731	0.126	0.064	5.5795315857993536e-14	Seq_e1.Crh-Scgn
1700025G04Rik	2.4601050738323875e-18	0.7824509649063466	0.427	0.348	6.17092756720116e-14	Seq_e1.Crh-Scgn
Unc5b	2.5103798907454966e-18	2.0527331008976817	0.049	0.016	6.297036917946004e-14	Seq_e1.Crh-Scgn
Ppm1d	2.5792254908729194e-18	1.2790988233216931	0.138	0.073	6.469729221305631e-14	Seq_e1.Crh-Scgn
Gm3898	2.641500403098516e-18	4.273702911976556	0.01	0.001	6.625939611132318e-14	Seq_e1.Crh-Scgn
Cbfa2t3	2.9473374598847203e-18	1.8134033699746552	0.086	0.037	7.393101284374832e-14	Seq_e1.Crh-Scgn
Pitpnc1	4.551702828855648e-18	0.8436122166236453	0.446	0.372	1.1417491375901508e-13	Seq_e1.Crh-Scgn
Kiz	5.670250327558973e-18	0.8964786824287932	0.264	0.178	1.4223255921648927e-13	Seq_e1.Crh-Scgn
Serpinh1	6.598591993342903e-18	3.4796743285666345	0.015	0.002	1.6551908156101338e-13	Seq_e1.Crh-Scgn
Rps4l	6.871294335405854e-18	3.3145958151534947	0.012	0.001	1.7235954710932044e-13	Seq_e1.Crh-Scgn
Auts2	7.291950594378895e-18	0.6244877273461182	0.629	0.58	1.829112887094002e-13	Seq_e1.Crh-Scgn
Gphn	8.144755937194999e-18	0.4484867647864901	0.708	0.685	2.0430305792859937e-13	Seq_e1.Crh-Scgn
CT010467.1	8.321138294756972e-18	1.009082865947443	0.086	0.037	2.087274329856839e-13	Seq_e1.Crh-Scgn
Gm13268	9.095692608541913e-18	2.6070577911530997	0.025	0.005	2.2815635339266535e-13	Seq_e1.Crh-Scgn
Ppara	9.16418091529451e-18	2.609335688219861	0.019	0.003	2.298743140792475e-13	Seq_e1.Crh-Scgn
Gm49599	1.166178268184404e-17	1.3677424441727721	0.09	0.041	2.925241567913759e-13	Seq_e1.Crh-Scgn
Ssr4	1.2429760659516027e-17	1.1021226929458248	0.429	0.372	3.1178811638330006e-13	Seq_e1.Crh-Scgn
E130307A14Rik	1.5080760125911256e-17	0.6208371909223127	0.4	0.302	3.782857869983579e-13	Seq_e1.Crh-Scgn
Stk32b	1.5371238545226882e-17	1.6439758027488707	0.066	0.026	3.855721476684711e-13	Seq_e1.Crh-Scgn
Thoc2l	1.777751510548992e-17	1.081112205235247	0.115	0.057	4.459311889061091e-13	Seq_e1.Crh-Scgn
Prkca	1.8329326753805806e-17	1.0733446899287191	0.33	0.248	4.597728322924649e-13	Seq_e1.Crh-Scgn
Hist1h2bc	1.8859586441914775e-17	2.4913877387296703	0.031	0.008	4.730738663089902e-13	Seq_e1.Crh-Scgn
Spint2	2.0595974263940407e-17	1.4729005414975305	0.292	0.226	5.166294184366812e-13	Seq_e1.Crh-Scgn
Galnt16	2.1252093334899653e-17	0.7293802826417302	0.399	0.314	5.330875092126229e-13	Seq_e1.Crh-Scgn
Col4a1	2.7263616874380218e-17	1.0106174771576202	0.153	0.085	6.838805656769534e-13	Seq_e1.Crh-Scgn
Gm5067	2.753857424584331e-17	3.229965750717354	0.011	0.001	6.907775963827337e-13	Seq_e1.Crh-Scgn
Syt6	2.9562153346712624e-17	1.145102351628064	0.121	0.061	7.415370545489394e-13	Seq_e1.Crh-Scgn
Casq2	3.461189477671949e-17	3.1079906082575994	0.019	0.003	8.682047685792317e-13	Seq_e1.Crh-Scgn
Gm37731	3.65722193420661e-17	2.658489489716785	0.019	0.003	9.17377549976386e-13	Seq_e1.Crh-Scgn
Epb41l4b	3.725483444200579e-17	0.7673951055993451	0.369	0.283	9.345002671432732e-13	Seq_e1.Crh-Scgn
Gm15478	4.0422735206081135e-17	0.9403099087198565	0.175	0.102	1.0139638899093391e-12	Seq_e1.Crh-Scgn
Cmip	4.228636475951475e-17	0.5346442911722025	0.587	0.53	1.0607111736276679e-12	Seq_e1.Crh-Scgn
Pced1b	4.804084579095181e-17	0.7333627493810619	0.309	0.219	1.2050565758202352e-12	Seq_e1.Crh-Scgn
Sulf1	5.72817944085666e-17	1.0267998571971568	0.176	0.104	1.4368565309444846e-12	Seq_e1.Crh-Scgn
Olfm3	6.489379231242391e-17	0.673078	0.466	0.381	1.6277958863648415e-12	Seq_e1.Crh-Scgn
Gm43362	6.832050774858693e-17	1.2819041465906764	0.081	0.035	1.7137516163655547e-12	Seq_e1.Crh-Scgn
Gm11346	6.972123002982958e-17	2.2268849692618318	0.021	0.004	1.7488873340682452e-12	Seq_e1.Crh-Scgn
Cd63	7.42499519825117e-17	1.1908256371783823	0.162	0.095	1.8624857955293235e-12	Seq_e1.Crh-Scgn
Mxd4	7.727609601839021e-17	1.2237109174783192	0.213	0.139	1.9383935925253e-12	Seq_e1.Crh-Scgn
Slc38a2	9.19477334187299e-17	0.8824245828646846	0.331	0.248	2.306416945075421e-12	Seq_e1.Crh-Scgn
Galnt18	9.618154200026733e-17	0.6980898153523382	0.341	0.251	2.4126177995347055e-12	Seq_e1.Crh-Scgn
Notch4	1.0137105442665177e-16	3.1598175239918636	0.021	0.004	2.542791529238133e-12	Seq_e1.Crh-Scgn
Tmem39a	1.1103039775679836e-16	1.1207731654001796	0.124	0.064	2.78508649733153e-12	Seq_e1.Crh-Scgn
Gm47283	1.232352413813619e-16	1.3502113892055023	0.105	0.051	3.091232794810082e-12	Seq_e1.Crh-Scgn
5330406M23Rik	1.2771512400896935e-16	1.624964805552898	0.047	0.016	3.2036061706409873e-12	Seq_e1.Crh-Scgn
Rere	1.4560628222826406e-16	0.527517	0.604	0.548	3.6523879834137754e-12	Seq_e1.Crh-Scgn
Det1	2.0081579707786063e-16	1.4758597009019156	0.107	0.054	5.037263453901056e-12	Seq_e1.Crh-Scgn
Dock4	2.2536938563297796e-16	0.8655232590796837	0.415	0.344	5.6531656692176195e-12	Seq_e1.Crh-Scgn
Tasor	2.436407908633307e-16	1.2479417004371514	0.083	0.037	6.111485598015788e-12	Seq_e1.Crh-Scgn
Eml6	2.554502254232227e-16	0.5277229599671152	0.56	0.486	6.407713454516118e-12	Seq_e1.Crh-Scgn
Rgcc	2.9074214120891654e-16	1.6246789135704094	0.033	0.009	7.292975870084463e-12	Seq_e1.Crh-Scgn
Gm10649	2.9715324261495416e-16	2.3562670091902778	0.036	0.01	7.453791937753511e-12	Seq_e1.Crh-Scgn
Aplp1	3.1554779641858364e-16	0.5956077778871867	0.59	0.533	7.915200925363752e-12	Seq_e1.Crh-Scgn
Magi3	3.4116944286127077e-16	0.6723976346870073	0.481	0.411	8.557894304732116e-12	Seq_e1.Crh-Scgn
4930484I04Rik	3.459550838762118e-16	1.9068433572294405	0.039	0.012	8.677937323950896e-12	Seq_e1.Crh-Scgn
Macrod2	3.7203720845655857e-16	0.3781937269738318	0.708	0.667	9.332181336924316e-12	Seq_e1.Crh-Scgn
Runx2	4.0317542823603406e-16	1.122692744126486	0.142	0.079	1.0113252441872679e-11	Seq_e1.Crh-Scgn
Kcnj6	4.436059264240981e-16	0.8270825760584445	0.318	0.234	1.1127411058422078e-11	Seq_e1.Crh-Scgn
Zcchc9	4.541368598224967e-16	0.9903434049147539	0.223	0.147	1.1391568991787508e-11	Seq_e1.Crh-Scgn
Frmd6	5.067200581549718e-16	1.553369681239518	0.094	0.045	1.2710565938759311e-11	Seq_e1.Crh-Scgn
Fosl1	5.067237177588305e-16	2.0592781849239903	0.042	0.013	1.2710657736262503e-11	Seq_e1.Crh-Scgn
Ahi1	5.371298277192214e-16	0.2197011137274627	0.97	0.965	1.347336459850895e-11	Seq_e1.Crh-Scgn
Sik3	5.422143361921022e-16	0.7373621221262365	0.454	0.391	1.3600904409042692e-11	Seq_e1.Crh-Scgn
Pitpnm2	5.709779108728513e-16	1.0431304179311298	0.209	0.135	1.4322409916334601e-11	Seq_e1.Crh-Scgn
Reps2	6.050893408956903e-16	1.0341182857708064	0.362	0.301	1.5178061027027495e-11	Seq_e1.Crh-Scgn
Gm37376	6.380491650549919e-16	1.9736286743913216	0.043	0.014	1.6004825256239418e-11	Seq_e1.Crh-Scgn
Gm32036	6.607487391979931e-16	1.1461058409811686	0.076	0.033	1.657422137404246e-11	Seq_e1.Crh-Scgn
Tcerg1l	6.918069413890437e-16	1.2509007983897065	0.175	0.108	1.7353285317802772e-11	Seq_e1.Crh-Scgn
Abhd17b	7.384701631846603e-16	1.2477267917419241	0.236	0.165	1.852378557332402e-11	Seq_e1.Crh-Scgn
Gm42439	7.882316951306707e-16	1.1141556490713236	0.178	0.108	1.9772003840657746e-11	Seq_e1.Crh-Scgn
B230216N24Rik	8.770875702410108e-16	0.8611802413631078	0.202	0.127	2.2000864611925514e-11	Seq_e1.Crh-Scgn
Phf21a	8.914199991517921e-16	0.6419758238208458	0.429	0.346	2.2360379258723552e-11	Seq_e1.Crh-Scgn
Soga1	8.926397246032163e-16	0.9750496696201474	0.186	0.115	2.2390974851947078e-11	Seq_e1.Crh-Scgn
Ppp2r3a	9.353717014532417e-16	0.7310741361070336	0.386	0.302	2.3462863759253113e-11	Seq_e1.Crh-Scgn
Gpr158	1.0080007263144551e-15	0.5713157133234554	0.584	0.555	2.528469021887179e-11	Seq_e1.Crh-Scgn
Grid1	1.0227021498305413e-15	0.46424042862682646	0.463	0.379	2.5653460726349296e-11	Seq_e1.Crh-Scgn
Kcnb2	1.1460134774616632e-15	0.4958336162920798	0.562	0.484	2.874660206864836e-11	Seq_e1.Crh-Scgn
Gm48582	1.147552014628431e-15	1.915443277669615	0.031	0.008	2.8785194734939563e-11	Seq_e1.Crh-Scgn
Adgrb3	1.2379167701984806e-15	0.4219910912228011	0.781	0.754	3.105190426365869e-11	Seq_e1.Crh-Scgn
Fam92b	1.4296322017980953e-15	2.641830726927333	0.026	0.006	3.586089414990343e-11	Seq_e1.Crh-Scgn
H2-DMb2	1.4363495835020662e-15	3.684116164724059	0.012	0.001	3.602939295256583e-11	Seq_e1.Crh-Scgn
Arc	1.8890609151988137e-15	2.334552976391669	0.031	0.008	4.738520399684704e-11	Seq_e1.Crh-Scgn
Castor2	2.1372019629213347e-15	1.8714840553422891	0.053	0.02	5.3609574037918757e-11	Seq_e1.Crh-Scgn
Dnah1	2.1407507195521382e-15	1.0970669215857551	0.165	0.099	5.3698591049245836e-11	Seq_e1.Crh-Scgn
Sema3c	2.2480533119343277e-15	1.1835508589446393	0.167	0.102	5.639016927656068e-11	Seq_e1.Crh-Scgn
Qk	2.512973798198565e-15	1.1866010337607582	0.138	0.077	6.30354347540128e-11	Seq_e1.Crh-Scgn
Tasor2	2.609738645081931e-15	1.208855440925794	0.086	0.04	6.546268417323515e-11	Seq_e1.Crh-Scgn
Ppp3ca	3.0297899109892263e-15	0.35335507120606513	0.743	0.703	7.599925012725375e-11	Seq_e1.Crh-Scgn
Nuak1	3.1000934322242182e-15	1.3198710185569889	0.128	0.071	7.776274365391229e-11	Seq_e1.Crh-Scgn
Eif2ak2	3.746039660990811e-15	1.4703524731474469	0.076	0.034	9.39656588562935e-11	Seq_e1.Crh-Scgn
Baiap2	4.571725294652084e-15	0.8386990956824226	0.233	0.156	1.1467715729105287e-10	Seq_e1.Crh-Scgn
Scg2	4.6447953094476216e-15	0.8838037613872425	0.621	0.571	1.1651004554218413e-10	Seq_e1.Crh-Scgn
Gm3294	4.8173762930052895e-15	1.3717134934074138	0.07	0.03	1.2083906693374467e-10	Seq_e1.Crh-Scgn
4833422C13Rik	5.485738226084809e-15	1.348189186734611	0.124	0.068	1.3760425766311137e-10	Seq_e1.Crh-Scgn
Lrrfip2	5.587039152849628e-15	0.7139698415029999	0.39	0.316	1.4014529011008007e-10	Seq_e1.Crh-Scgn
Gm43847	5.7156226536713286e-15	2.1297806157366446	0.034	0.01	1.433706786446916e-10	Seq_e1.Crh-Scgn
4933413L06Rik	6.2835323497519925e-15	1.2140911471839853	0.079	0.036	1.57616125461179e-10	Seq_e1.Crh-Scgn
Fndc3a	8.600526002144786e-15	0.5130700895703579	0.553	0.502	2.1573559423779982e-10	Seq_e1.Crh-Scgn
Slc1a3	8.934628843106896e-15	2.046633807747184	0.028	0.007	2.2411622990049338e-10	Seq_e1.Crh-Scgn
Arhgef18	1.168225382213859e-14	0.9797377502941403	0.186	0.118	2.9303765487452435e-10	Seq_e1.Crh-Scgn
Sorbs2	1.1789671606730656e-14	0.5372488484315638	0.56	0.511	2.9573212258323176e-10	Seq_e1.Crh-Scgn
Lncpint	1.2217996404599804e-14	0.7072547243533285	0.485	0.438	3.0647622181298146e-10	Seq_e1.Crh-Scgn
Slc24a3	1.2352596160098149e-14	0.6469880954761813	0.53	0.474	3.0985252207990194e-10	Seq_e1.Crh-Scgn
Rad51ap2	1.2366715202249601e-14	1.4196151563102197	0.061	0.025	3.10206684133229e-10	Seq_e1.Crh-Scgn
Lrig1	1.3432715136972833e-14	1.6122087438695698	0.037	0.012	3.369462264958265e-10	Seq_e1.Crh-Scgn
A630081D01Rik	1.463183298426972e-14	2.980475715654591	0.012	0.001	3.6702489857742166e-10	Seq_e1.Crh-Scgn
Col4a2	1.533150529778778e-14	0.8494841457706194	0.27	0.191	3.845754788897087e-10	Seq_e1.Crh-Scgn
Cacna1d	1.66912062236776e-14	0.6208922651724704	0.513	0.445	4.186822169147289e-10	Seq_e1.Crh-Scgn
Mical3	2.347180887587131e-14	0.5579136402188125	0.494	0.431	5.88766853842356e-10	Seq_e1.Crh-Scgn
Mrtfa	3.164835718012559e-14	1.3324447930237202	0.07	0.031	7.938673915062704e-10	Seq_e1.Crh-Scgn
P2ry14	3.3879089198234135e-14	0.47132530674263506	0.258	0.172	8.49823073448505e-10	Seq_e1.Crh-Scgn
Slc25a48	3.4818690763200736e-14	3.3677833203058976	0.01	0.001	8.733920391041272e-10	Seq_e1.Crh-Scgn
Ctbp2	3.721960540738902e-14	0.9194872946826389	0.228	0.155	9.336165820389462e-10	Seq_e1.Crh-Scgn
Gm15398	3.8387525619555545e-14	0.5585781750951344	0.281	0.197	9.629126926409312e-10	Seq_e1.Crh-Scgn
Tap2	4.3605849547594726e-14	1.544437123718461	0.061	0.026	1.0938091300518661e-9	Seq_e1.Crh-Scgn
Nfat5	4.431284070954121e-14	0.6821220525285114	0.408	0.333	1.1115432963581317e-9	Seq_e1.Crh-Scgn
Osbpl6	4.533146609710569e-14	0.47318453347732126	0.541	0.483	1.1370944955797991e-9	Seq_e1.Crh-Scgn
Slc10a7	4.8173467159408467e-14	0.9994664987897783	0.142	0.083	1.208383250226602e-9	Seq_e1.Crh-Scgn
Bmpr1a	4.872713545489211e-14	0.7897514152590379	0.277	0.2	1.2222714657505138e-9	Seq_e1.Crh-Scgn
Pde10a	4.876867991635314e-14	0.594505	0.493	0.433	1.2233135670218021e-9	Seq_e1.Crh-Scgn
Ripor2	5.226711909297713e-14	0.69806	0.376	0.302	1.3110684153282383e-9	Seq_e1.Crh-Scgn
H1f4	5.471800568344695e-14	3.0465945156567944	0.014	0.002	1.3725464545635832e-9	Seq_e1.Crh-Scgn
Acap2	5.587444388056245e-14	0.810748	0.33	0.258	1.4015545503000285e-9	Seq_e1.Crh-Scgn
Mga	5.606824951550742e-14	0.6281019892920117	0.417	0.341	1.406415970846988e-9	Seq_e1.Crh-Scgn
Bcr	5.803186229694987e-14	0.9301465949606265	0.283	0.209	1.4556712338566906e-9	Seq_e1.Crh-Scgn
4930467D21Rik	6.049508588586537e-14	1.9912124514221015	0.043	0.015	1.517458734361047e-9	Seq_e1.Crh-Scgn
Sgsm2	6.088075825621131e-14	0.7416115892003481	0.31	0.233	1.5271329400988046e-9	Seq_e1.Crh-Scgn
Kl	6.212892911951717e-14	2.43303	0.025	0.006	1.5584420580339686e-9	Seq_e1.Crh-Scgn
Gm49085	6.367110645756339e-14	1.9008172520279785	0.031	0.009	1.5971260343815202e-9	Seq_e1.Crh-Scgn
Ptprf	7.811831704722824e-14	0.8690029602628984	0.298	0.226	1.959519864812673e-9	Seq_e1.Crh-Scgn
Srgap3	8.578744117339455e-14	0.6553025521315935	0.424	0.354	2.151892174393429e-9	Seq_e1.Crh-Scgn
Vps13b	8.809985016066811e-14	0.5214394680135601	0.48	0.404	2.209896641430199e-9	Seq_e1.Crh-Scgn
Itprid2	9.094412505457586e-14	1.7858087544275687	0.031	0.009	2.281242432868981e-9	Seq_e1.Crh-Scgn
Lamc1	1.0212046592472753e-13	1.1646434767367235	0.125	0.071	2.561589767255865e-9	Seq_e1.Crh-Scgn
B4galt1	1.2642531410275103e-13	1.189815663191688	0.083	0.04	3.171252578953407e-9	Seq_e1.Crh-Scgn
2210408F21Rik	1.3649679218599e-13	0.6953066387121238	0.356	0.282	3.4238855351933732e-9	Seq_e1.Crh-Scgn
Gm29707	1.502307237828078e-13	2.068704293260264	0.031	0.009	3.768387475367951e-9	Seq_e1.Crh-Scgn
Gm27153	1.5438806138849612e-13	1.4092740431929394	0.071	0.032	3.8726701318690365e-9	Seq_e1.Crh-Scgn
Srrm4os	1.5779320652761289e-13	0.9495002155792207	0.192	0.126	3.958084792538642e-9	Seq_e1.Crh-Scgn
4933432K03Rik	1.602727336872687e-13	2.3823118113315847	0.021	0.005	4.020281251811449e-9	Seq_e1.Crh-Scgn
Nbea	1.6789419632080326e-13	0.343985	0.725	0.717	4.2114580205110286e-09	Seq_e1.Crh-Scgn
Kctd16	1.6975367270092056e-13	0.7040671304491204	0.256	0.18	4.2581011260298915e-9	Seq_e1.Crh-Scgn
Pou6f1	2.034320522131237e-13	0.8373907397563775	0.252	0.177	5.102889597713994e-9	Seq_e1.Crh-Scgn
Nespas	2.1271898881993623e-13	1.283402471628435	0.08	0.038	5.33584311555928e-9	Seq_e1.Crh-Scgn
4930532I03Rik	2.131040699369526e-13	1.1484315819172384	0.127	0.072	5.3455024902985195e-9	Seq_e1.Crh-Scgn
Gas5	2.1352017995525568e-13	0.36008813195323697	0.741	0.702	5.3559401939976334e-9	Seq_e1.Crh-Scgn
Parp4	2.1813185588377435e-13	1.491528655543096	0.062	0.027	5.471619472988596e-9	Seq_e1.Crh-Scgn
Zdhhc20	2.624372353466485e-13	0.5097574539322285	0.505	0.445	6.582975611435331e-9	Seq_e1.Crh-Scgn
C530043K16Rik	2.8138636135614355e-13	2.248496429947255	0.02	0.004	7.058295488257505e-9	Seq_e1.Crh-Scgn
Gm38365	3.286559255729871e-13	2.324452148475209	0.022	0.005	8.244005237072808e-9	Seq_e1.Crh-Scgn
As3mt	4.2536484492102126e-13	0.9508353992879504	0.166	0.104	1.0669851769998897e-8	Seq_e1.Crh-Scgn
Mok	4.357726032128814e-13	0.8697564311747067	0.199	0.132	1.0930919978991917e-8	Seq_e1.Crh-Scgn
Iqsec3	4.709521181849554e-13	0.8022175538587831	0.267	0.195	1.1813362932551421e-8	Seq_e1.Crh-Scgn
Rpn2	5.314053192939367e-13	0.8445297387197458	0.351	0.286	1.3329771029169107e-8	Seq_e1.Crh-Scgn
6820431F20Rik	6.027358238121633e-13	1.1040682685876693	0.097	0.051	1.5119025404504306e-8	Seq_e1.Crh-Scgn
Ecpas	8.366625330255084e-13	0.8858044701660934	0.109	0.059	2.098684297841185e-8	Seq_e1.Crh-Scgn
Gm12353	8.665217532098339e-13	0.7930495609222499	0.265	0.192	2.1735831657515472e-8	Seq_e1.Crh-Scgn
Ccdc191	8.922954433901112e-13	0.8295333298252767	0.232	0.163	2.238233890199755e-8	Seq_e1.Crh-Scgn
Trim2	1.0804625241910055e-12	0.41095328915742724	0.677	0.661	2.7102321956807183e-8	Seq_e1.Crh-Scgn
Yipf5	1.088809370712674e-12	0.9231501441026618	0.3	0.237	2.7311694254956714e-8	Seq_e1.Crh-Scgn
Btg1	1.1617534763571293e-12	1.2602780877748012	0.091	0.048	2.914142420094223e-8	Seq_e1.Crh-Scgn
Icam2	1.3113475808385048e-12	2.371199581679441	0.026	0.007	3.2893842717753054e-8	Seq_e1.Crh-Scgn
Racgap1	1.3727780636470305e-12	1.385968338103725	0.097	0.052	3.4434764948522113e-8	Seq_e1.Crh-Scgn
Mdga1	1.4886857923974634e-12	0.9482911378413559	0.169	0.109	3.734219441649797e-8	Seq_e1.Crh-Scgn
Epha5	1.5704544968788616e-12	0.37674847293688174	0.689	0.638	3.939328059970936e-8	Seq_e1.Crh-Scgn
Gm26604	1.5984427736282908e-12	2.564274699117192	0.026	0.007	4.0095338533692045e-8	Seq_e1.Crh-Scgn
Odf2	1.7463383756191686e-12	0.5500549538648405	0.539	0.494	4.3805151814031226e-8	Seq_e1.Crh-Scgn
Trank1	1.7899838887232754e-12	0.604544	0.437	0.375	4.489995586473464e-8	Seq_e1.Crh-Scgn
Gm48091	1.9991794709637173e-12	1.536852862605559	0.047	0.018	5.014741784965389e-8	Seq_e1.Crh-Scgn
Stk38l	2.0630656880120817e-12	1.189290487869627	0.143	0.088	5.174993971809506e-8	Seq_e1.Crh-Scgn
Gm20687	2.918335628080594e-12	0.9286057004295426	0.179	0.117	7.320353089477362e-8	Seq_e1.Crh-Scgn
Pacrg	2.9261731824578685e-12	0.9560482452320437	0.217	0.152	7.340012810877318e-8	Seq_e1.Crh-Scgn
Slit1	2.93100261056525e-12	0.7601364325105023	0.256	0.188	7.352126948341872e-8	Seq_e1.Crh-Scgn
Gm37459	3.5420068091107324e-12	1.073843479136806	0.112	0.063	8.884769879973361e-8	Seq_e1.Crh-Scgn
Tut7	3.724565367013031e-12	1.3550616146715213	0.055	0.023	9.342699766615487e-8	Seq_e1.Crh-Scgn
Rab34	3.9082485070003604e-12	0.7008183474671152	0.183	0.119	9.803450554959705e-8	Seq_e1.Crh-Scgn
Sybu	4.0818580157778104e-12	0.5078831413439944	0.55	0.514	1.0238932646777059e-7	Seq_e1.Crh-Scgn
Txndc11	4.393905673439588e-12	0.8829204021141766	0.24	0.176	1.1021672991255863e-7	Seq_e1.Crh-Scgn
D830024N08Rik	4.3975138484311665e-12	0.6858114198661331	0.24	0.168	1.1030723737404738e-7	Seq_e1.Crh-Scgn
Rps6ka5	4.466976429336076e-12	0.8704124518320328	0.225	0.159	1.1204963675346613e-7	Seq_e1.Crh-Scgn
F730043M19Rik	5.364055916081432e-12	1.9085401599077052	0.032	0.011	1.3455197859898663e-7	Seq_e1.Crh-Scgn
Col6a5	5.6555059454956664e-12	1.546318051080791	0.054	0.023	1.418627111368133e-7	Seq_e1.Crh-Scgn
Gem	5.729128324271033e-12	1.6417771407983517	0.062	0.028	1.4370945488601458e-7	Seq_e1.Crh-Scgn
Kcnj12	5.776237046158013e-12	1.4116339607049369	0.113	0.066	1.448911300658276e-7	Seq_e1.Crh-Scgn
Lancl3	5.864282385108055e-12	1.7523094626989009	0.05	0.021	1.4709965934805044e-7	Seq_e1.Crh-Scgn
Sptbn2	6.04190631896133e-12	1.0217917132478738	0.273	0.209	1.5155517810482599e-7	Seq_e1.Crh-Scgn
BC039771	6.447593532815526e-12	1.5224436999773692	0.063	0.029	1.6173143617714466e-7	Seq_e1.Crh-Scgn
1700012B09Rik	6.957098837259792e-12	1.8374406018666223	0.056	0.025	1.7451186723382462e-7	Seq_e1.Crh-Scgn
A930017M01Rik	8.320908099145893e-12	0.9311635686230224	0.102	0.056	2.087216587589756e-7	Seq_e1.Crh-Scgn
Zfp532	8.321102297716813e-12	0.8344146203460616	0.25	0.184	2.0872653003592855e-7	Seq_e1.Crh-Scgn
Brinp2	8.579771204467034e-12	0.7584609954506638	0.299	0.231	2.1521498089285107e-7	Seq_e1.Crh-Scgn
4930415C11Rik	8.750208958073086e-12	1.473748130568251	0.053	0.023	2.1949024150430527e-7	Seq_e1.Crh-Scgn
BC055308	8.824410906631748e-12	2.8410050710997385	0.01	0.001	2.2135152318195075e-7	Seq_e1.Crh-Scgn
Neto1	9.649223368077516e-12	0.9192486107631616	0.209	0.144	2.4204111896485644e-7	Seq_e1.Crh-Scgn
Ambra1	9.872420273924511e-12	0.5310364745325569	0.401	0.329	2.476397901511224e-7	Seq_e1.Crh-Scgn
Trmt9b	1.0585468425310714e-11	2.174532344381557	0.019	0.005	2.6552588998049393e-7	Seq_e1.Crh-Scgn
Zhx2	1.1047264184481235e-11	1.095043572775239	0.098	0.054	2.771095748035273e-7	Seq_e1.Crh-Scgn
Mitf	1.1620419424041656e-11	1.27446	0.082	0.042	2.914866008326609e-7	Seq_e1.Crh-Scgn
Creb3l1	1.1999242582540648e-11	2.127134202447968	0.029	0.009	3.0098900094044964e-7	Seq_e1.Crh-Scgn
Cflar	1.2550279986047125e-11	1.6639351557393693	0.075	0.038	3.1481122317000606e-7	Seq_e1.Crh-Scgn
Orc1	1.2784758544856856e-11	1.0372441131503103	0.104	0.058	3.206928833391894e-7	Seq_e1.Crh-Scgn
Relch	1.303675533564878e-11	0.9761499435904137	0.084	0.043	3.27013970839414e-7	Seq_e1.Crh-Scgn
Ier2	1.43598425053641e-11	2.3610295626545614	0.043	0.017	3.602022894045531e-7	Seq_e1.Crh-Scgn
Gm11713	1.535106963421512e-11	1.3453495779573248	0.068	0.033	3.8506623070465203e-7	Seq_e1.Crh-Scgn
Myo7a	1.80690178105124e-11	1.3243724003634312	0.051	0.022	4.5324324275889304e-7	Seq_e1.Crh-Scgn
Trim15	1.8880912743244622e-11	3.0675198484211297	0.012	0.002	4.736088152515481e-7	Seq_e1.Crh-Scgn
Sgms1	1.946185825980811e-11	0.6493671186160028	0.277	0.208	4.881812525890266e-7	Seq_e1.Crh-Scgn
Cacna1a	2.034262798942629e-11	0.4234645550034446	0.611	0.588	5.102744804867691e-7	Seq_e1.Crh-Scgn
Fbxl17	2.0555972437971234e-11	0.5111611604041889	0.417	0.349	5.156260126340704e-7	Seq_e1.Crh-Scgn
Cplane1	2.0762858353472545e-11	0.5870117461284778	0.12	0.069	5.208155389385053e-7	Seq_e1.Crh-Scgn
Jmjd1c	2.2186766850928012e-11	0.48751949639104286	0.491	0.435	5.565328596886783e-7	Seq_e1.Crh-Scgn
Gm10271	2.2682209961267587e-11	2.709284879903442	0.011	0.002	5.689605546684362e-7	Seq_e1.Crh-Scgn
Gm47033	2.2906041255146914e-11	2.3950070977485236	0.01	0.001	5.745751388441052e-7	Seq_e1.Crh-Scgn
Scg3	2.522485791132495e-11	0.7904243284501495	0.422	0.373	6.327403358476751e-7	Seq_e1.Crh-Scgn
Khdc4	2.609071459835323e-11	1.260508856905163	0.063	0.029	6.544594849850925e-7	Seq_e1.Crh-Scgn
4931440P22Rik	2.6261165609532063e-11	2.4963437414871237	0.015	0.003	6.587350781495023e-7	Seq_e1.Crh-Scgn
Piezo2	2.7611382866478944e-11	1.6111019409410388	0.059	0.027	6.926039278227578e-7	Seq_e1.Crh-Scgn
Gm45345	2.7628170301015277e-11	1.728480659390927	0.041	0.016	6.930250238306672e-7	Seq_e1.Crh-Scgn
Slc22a23	2.8304265670633995e-11	0.97612	0.226	0.165	7.099842000821831e-7	Seq_e1.Crh-Scgn
B3galt1	2.947804601945585e-11	0.3206563463032599	0.489	0.416	7.394273063520306e-7	Seq_e1.Crh-Scgn
Ascc3	3.142085808044833e-11	0.599917	0.369	0.304	7.881608040899658e-7	Seq_e1.Crh-Scgn
Prex1	3.229697255508576e-11	1.343515500129699	0.077	0.04	8.101372595717712e-7	Seq_e1.Crh-Scgn
Igf2r	3.25928448452716e-11	1.1494437672926767	0.16	0.105	8.175589200987929e-7	Seq_e1.Crh-Scgn
Gm16070	3.4094438360073373e-11	1.5486413306595452	0.073	0.037	8.552248918240805e-7	Seq_e1.Crh-Scgn
Bmerb1	3.42184522713663e-11	1.0515368028758854	0.073	0.037	8.583356567749522e-7	Seq_e1.Crh-Scgn
Rasa4	3.46977295478503e-11	0.9135303911823517	0.147	0.093	8.70357847978277e-7	Seq_e1.Crh-Scgn
Slc9a9	3.607445298835347e-11	0.5461915830937196	0.257	0.185	9.048915787598584e-7	Seq_e1.Crh-Scgn
Mtrex	3.643146574653411e-11	1.233020163327013	0.05	0.021	9.138468867860617e-7	Seq_e1.Crh-Scgn
Epb41	3.8098396896486684e-11	0.6675738394258988	0.311	0.242	9.55660187751472e-7	Seq_e1.Crh-Scgn
4632427E13Rik	3.912116314443373e-11	0.6904754962000506	0.109	0.062	9.813152563149757e-7	Seq_e1.Crh-Scgn
Gm26846	4.192249809044296e-11	2.041543518999034	0.023	0.007	1.0515839421006714e-6	Seq_e1.Crh-Scgn
Pde7a	4.3511199824969954e-11	0.6759741378507823	0.263	0.193	1.0914349364095463e-6	Seq_e1.Crh-Scgn
Mia2	4.51650647420794e-11	1.179303039736857	0.066	0.032	1.1329204839903196e-6	Seq_e1.Crh-Scgn
Gm14172	4.6414452634597155e-11	1.2153269826841653	0.053	0.023	1.164260129886235e-6	Seq_e1.Crh-Scgn
N4bp2l1	4.672020676871322e-11	0.8420454399085597	0.411	0.366	1.1719296665864024e-6	Seq_e1.Crh-Scgn
Sorbs2os	4.6874203092499716e-11	0.7031442642530688	0.303	0.232	1.175792510372263e-6	Seq_e1.Crh-Scgn
Neurod1	4.917009736039315e-11	1.4184650341793683	0.105	0.061	1.2333827221881018e-6	Seq_e1.Crh-Scgn
Gm37679	5.886753140955081e-11	0.7456549198563437	0.187	0.126	1.4766331578771726e-6	Seq_e1.Crh-Scgn
Mettl7a1	6.095892358683748e-11	1.1758274546557659	0.145	0.093	1.5290936392522312e-6	Seq_e1.Crh-Scgn
Dact1	6.825127044518696e-11	1.902072761257624	0.041	0.016	1.7120148678470697e-6	Seq_e1.Crh-Scgn
Vim	6.98541973781447e-11	1.833659217679299	0.03	0.01	1.7522226870333815e-6	Seq_e1.Crh-Scgn
Slc24a2	6.998960099815891e-11	0.525662	0.492	0.437	1.755619151437818e-6	Seq_e1.Crh-Scgn
Arhgap10	8.671133493567313e-11	1.2057415181807731	0.077	0.04	2.175067125526425e-6	Seq_e1.Crh-Scgn
Bet1	8.917040469999437e-11	0.8953941552956939	0.213	0.155	2.236750431494659e-6	Seq_e1.Crh-Scgn
Thrb	9.137591031551113e-11	0.6426395560488208	0.282	0.217	2.2920733343542814e-6	Seq_e1.Crh-Scgn
Arhgap44	9.83339460699493e-11	0.6420141829725639	0.372	0.313	2.4666087032186083e-6	Seq_e1.Crh-Scgn
Lrpap1	9.858003482432067e-11	1.1941039289195077	0.398	0.377	2.4727815935332596e-06	Seq_e1.Crh-Scgn
Nyap2	9.975076789611352e-11	0.6037254681389135	0.383	0.321	2.5021482619061116e-6	Seq_e1.Crh-Scgn
Gm16701	1.0308695511885794e-10	1.9733029340695118	0.045	0.019	2.5858331822014327e-6	Seq_e1.Crh-Scgn
Mosmo	1.078131769250505e-10	1.2664402885196786	0.049	0.021	2.7043857299879666e-6	Seq_e1.Crh-Scgn
Gm42798	1.0952195204606333e-10	2.412644216204198	0.012	0.002	2.7472486451234524e-6	Seq_e1.Crh-Scgn
Gm48914	1.1224619102257175e-10	1.8866300245756387	0.023	0.007	2.81558345561019e-6	Seq_e1.Crh-Scgn
A230004M16Rik	1.1358244275987706e-10	0.8475431963002547	0.213	0.152	2.849101994188756e-6	Seq_e1.Crh-Scgn
Prrc1	1.145373563638166e-10	0.9664968630910015	0.189	0.132	2.8730550470299754e-6	Seq_e1.Crh-Scgn
St7	1.2149188319260491e-10	0.6091111098819204	0.3	0.234	3.047502398003302e-6	Seq_e1.Crh-Scgn
Frmd5	1.2346239670638504e-10	0.5002037248902937	0.499	0.451	3.0969307589829626e-6	Seq_e1.Crh-Scgn
Gm42702	1.3678524153514267e-10	1.475940686442903	0.039	0.015	3.431120998667519e-6	Seq_e1.Crh-Scgn
Nedd4	1.4753800867203682e-10	0.3830318315740182	0.677	0.657	3.7008434095293715e-6	Seq_e1.Crh-Scgn
Npffr1	1.486036452084893e-10	0.8071412866570229	0.119	0.071	3.727573836409746e-6	Seq_e1.Crh-Scgn
Apbb2	1.6158531557568826e-10	0.6919369947817576	0.408	0.364	4.053206055900565e-6	Seq_e1.Crh-Scgn
Clmn	1.6573756085128538e-10	0.8034803872992751	0.305	0.244	4.1573609763936426e-6	Seq_e1.Crh-Scgn
Agfg2	1.7198824591424919e-10	0.8953721199191595	0.216	0.159	4.314153160513026e-6	Seq_e1.Crh-Scgn
Dennd1a	1.727813206488191e-10	0.4176309695445082	0.488	0.426	4.334046647154978e-6	Seq_e1.Crh-Scgn
A830011K09Rik	1.9393237135105463e-10	1.4468771819083464	0.05	0.022	4.8645996029698544e-6	Seq_e1.Crh-Scgn
Gprin3	2.0642533567413212e-10	0.8642739040122145	0.216	0.158	5.17797312004993e-6	Seq_e1.Crh-Scgn
Armh3	2.065510680030294e-10	1.2548744274430694	0.062	0.03	5.1811269897879895e-6	Seq_e1.Crh-Scgn
Chrdl1	2.1713249645667077e-10	1.9076462712800835	0.035	0.013	5.44655154111913e-6	Seq_e1.Crh-Scgn
Gm38120	2.178971126864711e-10	2.3737128184297216	0.014	0.003	5.465731174627441e-6	Seq_e1.Crh-Scgn
March7	2.2015062939398334e-10	0.6349641213484795	0.386	0.332	5.522258387718678e-6	Seq_e1.Crh-Scgn
Rpl17-ps10	2.2150744620315096e-10	1.8284637260787564	0.019	0.005	5.556292780559839e-6	Seq_e1.Crh-Scgn
Rnpc3	2.2878969929222177e-10	0.49604234549993276	0.623	0.589	5.7389608170460905e-6	Seq_e1.Crh-Scgn
Col7a1	2.297020581234402e-10	1.0815957389454516	0.042	0.017	5.761846425968374e-6	Seq_e1.Crh-Scgn
Myo9b	2.5046937445458034e-10	0.795605	0.21	0.151	6.282773788818693e-6	Seq_e1.Crh-Scgn
Tspan5	2.594910395653708e-10	0.7771926936612163	0.333	0.277	6.509073236457761e-6	Seq_e1.Crh-Scgn
Rasgrf2	2.652513216958508e-10	0.4533071266313675	0.416	0.356	6.653564153418722e-6	Seq_e1.Crh-Scgn
Lman1	2.668772744497769e-10	0.8692663394325817	0.276	0.22	6.694349552298204e-6	Seq_e1.Crh-Scgn
AC158804.1	2.6793537428975877e-10	2.8911699398321975	0.01	0.002	6.720890928684309e-6	Seq_e1.Crh-Scgn
Gm10578	2.731219063646809e-10	2.024894487248318	0.02	0.006	6.850989899251656e-6	Seq_e1.Crh-Scgn
Gm13622	2.854522385014782e-10	1.510787069068562	0.032	0.011	7.160283950571079e-6	Seq_e1.Crh-Scgn
Ntrk3	2.8635830316042924e-10	0.4591758432265074	0.496	0.435	7.183011676476207e-6	Seq_e1.Crh-Scgn
Gm12068	2.897978788487517e-10	2.225310354304198	0.029	0.01	7.269289993042089e-6	Seq_e1.Crh-Scgn
Hdac4	2.9135016738532563e-10	0.8387298977107733	0.2	0.143	7.308227598693508e-6	Seq_e1.Crh-Scgn
Sinhcaf	3.587053138529082e-10	2.3623437427425484	0.012	0.002	8.997764092686349e-6	Seq_e1.Crh-Scgn
Adamts6	3.602254817939672e-10	0.8630469869359594	0.104	0.061	9.035895985319874e-6	Seq_e1.Crh-Scgn
Gm48678	3.664676433324343e-10	1.0632403770821965	0.063	0.031	9.192474365350783e-6	Seq_e1.Crh-Scgn
Gm26917	3.6878432518683867e-10	0.6959399048454238	0.233	0.171	9.250586012986661e-6	Seq_e1.Crh-Scgn
C130089K02Rik	3.9111910263582515e-10	2.0037530706358053	0.017	0.004	9.810831570517038e-6	Seq_e1.Crh-Scgn
Gm16267	4.0930843998882627e-10	1.7231253945216203	0.029	0.01	1.0267092908679719e-5	Seq_e1.Crh-Scgn
Ston2	4.2364523931894097e-10	1.3098933222239253	0.104	0.061	1.0626717183076315e-5	Seq_e1.Crh-Scgn
Kdm2a	4.53496603664699e-10	0.5941708528971311	0.349	0.284	1.137550880632531e-5	Seq_e1.Crh-Scgn
Gad2	4.554866052127942e-10	0.5611069425608914	0.224	0.16	1.142542600515773e-5	Seq_e1.Crh-Scgn
Slc39a14	4.6026408044702195e-10	1.0456268593271836	0.122	0.076	1.1545264193933099e-5	Seq_e1.Crh-Scgn
Tank	4.634496032111523e-10	0.8747211280483252	0.196	0.14	1.1625169846948544e-5	Seq_e1.Crh-Scgn
Csrnp1	4.898486259899668e-10	2.6459894690246095	0.015	0.003	1.2287362934332326e-5	Seq_e1.Crh-Scgn
Sbf2	5.056305841353884e-10	0.4621948569442931	0.481	0.433	1.2683237572452083e-5	Seq_e1.Crh-Scgn
4930538E20Rik	5.066743809314769e-10	2.164821195213526	0.028	0.009	1.2709420171285165e-5	Seq_e1.Crh-Scgn
Gm42696	5.158850352485943e-10	2.212158242871652	0.02	0.006	1.294046022417574e-5	Seq_e1.Crh-Scgn
Gm44071	5.343996524051478e-10	1.0804418848509667	0.049	0.022	1.3404880880930728e-5	Seq_e1.Crh-Scgn
Unk	5.829150278939989e-10	0.8475364313110788	0.222	0.161	1.4621840559693067e-5	Seq_e1.Crh-Scgn
Otof	6.030641173786643e-10	0.9837996779416465	0.137	0.088	1.5127260320326414e-5	Seq_e1.Crh-Scgn
Prkcq	6.912515340750288e-10	1.7354944695630339	0.029	0.01	1.733935348073802e-5	Seq_e1.Crh-Scgn
Parp12	7.227820579729504e-10	1.606290219185996	0.05	0.023	1.8130265142193487e-5	Seq_e1.Crh-Scgn
Phc2	8.047594043678997e-10	0.6075525038439952	0.335	0.27	2.0186584899164393e-5	Seq_e1.Crh-Scgn
Ly96	8.699259198450118e-10	1.6945624841375397	0.03	0.011	2.1821221773392277e-5	Seq_e1.Crh-Scgn
Ly6h	8.938390203864479e-10	0.7194517055556635	0.699	0.691	2.242105798737366e-5	Seq_e1.Crh-Scgn
Ttll11	9.920675235090461e-10	0.7311128381109819	0.236	0.177	2.4885021759700913e-5	Seq_e1.Crh-Scgn
Catspere2	1.1483309139877765e-9	0.9095305646223708	0.06	0.029	2.8804732646469386e-5	Seq_e1.Crh-Scgn
Manf	1.1490001409278322e-9	0.8058741490048923	0.381	0.346	2.8821519535033742e-5	Seq_e1.Crh-Scgn
Ntrk2	1.1571427178428827e-9	0.3608757815212771	0.643	0.622	2.902576793437087e-5	Seq_e1.Crh-Scgn
Jazf1	1.248078016322126e-9	0.6020316497646302	0.324	0.261	3.130678896142421e-5	Seq_e1.Crh-Scgn
Tsc22d4	1.3312580018612161e-9	0.8769611499342291	0.173	0.12	3.339327571868674e-5	Seq_e1.Crh-Scgn
Neto2	1.429287417776659e-9	0.8702028399094631	0.227	0.17	3.5852245587509715e-5	Seq_e1.Crh-Scgn
Rpgr	1.4313717692962997e-9	0.8534389893466899	0.266	0.21	3.590452946102838e-5	Seq_e1.Crh-Scgn
Glce	1.5287268323329859e-9	0.7541004511008844	0.227	0.169	3.834658386224062e-5	Seq_e1.Crh-Scgn
Gm42826	1.6808180653245623e-9	0.9608437884463172	0.06	0.029	4.216164035060132e-5	Seq_e1.Crh-Scgn
Syne1	1.6928124031249054e-9	0.26744496922030647	0.791	0.791	4.2462506319985126e-5	Seq_e1.Crh-Scgn
Ptpre	1.7847090058082365e-9	0.775977	0.249	0.19	4.47676407016938e-5	Seq_e1.Crh-Scgn
Sgsm1	1.8457259802260555e-9	0.6054459650650419	0.396	0.346	4.6298190487990375e-5	Seq_e1.Crh-Scgn
Plekha6	2.025654612618762e-9	0.6330600903897304	0.334	0.277	5.081152030292903e-5	Seq_e1.Crh-Scgn
Pcdhga12	2.0665767614354493e-9	1.1831580709516172	0.053	0.025	5.183801148384681e-5	Seq_e1.Crh-Scgn
Frmd4b	2.1048903435605067e-9	0.7364444725883584	0.187	0.132	5.279906937787175e-5	Seq_e1.Crh-Scgn
Invs	2.1470932696187787e-9	0.7165402421729259	0.192	0.136	5.385768757511744e-5	Seq_e1.Crh-Scgn
A830031A19Rik	2.2117393063434825e-9	1.7729323075379915	0.019	0.005	5.5479268760319916e-5	Seq_e1.Crh-Scgn
CT009510.2	2.2902420608349576e-9	1.2046185585609943	0.058	0.029	5.7448431853984074e-5	Seq_e1.Crh-Scgn
Sfmbt1	2.3381489876318556e-9	0.7204000157898898	0.325	0.272	5.8650129205757465e-5	Seq_e1.Crh-Scgn
Cntn6	2.338591296644234e-9	0.40571023436680154	0.462	0.401	5.866122408502397e-5	Seq_e1.Crh-Scgn
4933433G19Rik	2.3405391325223015e-9	1.8307525231265291	0.022	0.007	5.871008360018941e-5	Seq_e1.Crh-Scgn
Ssbp2	2.4204252707530556e-9	0.640265	0.352	0.299	6.0713947491569645e-5	Seq_e1.Crh-Scgn
Kcnip3	2.684555207124108e-9	0.8173975962529667	0.11	0.067	6.733938281550113e-5	Seq_e1.Crh-Scgn
Nf1	2.709819712444239e-9	0.4910179969420163	0.444	0.404	6.797311766695129e-5	Seq_e1.Crh-Scgn
Bend7	2.714652602858859e-9	0.6307089482894102	0.129	0.082	6.809434589011161e-5	Seq_e1.Crh-Scgn
Rnf217	2.7908401488546778e-9	0.7289820383276076	0.213	0.156	7.000543429387074e-5	Seq_e1.Crh-Scgn
Tent4b	2.971751777493455e-9	0.9743902728646954	0.055	0.026	7.454342158664582e-5	Seq_e1.Crh-Scgn
9630002D21Rik	3.1467725898402607e-9	1.6814353685417291	0.028	0.01	7.89336436435531e-5	Seq_e1.Crh-Scgn
Peg3	3.2977699334607216e-9	0.29214553284328115	0.876	0.864	8.272126101092874e-5	Seq_e1.Crh-Scgn
Gm48889	3.3401629952316358e-9	2.033647390778274	0.017	0.005	8.378464857239036e-5	Seq_e1.Crh-Scgn
Usp51	3.4919679331392997e-9	1.1337022179326466	0.101	0.061	8.759252363486619e-5	Seq_e1.Crh-Scgn
Pip4p2	4.022569993708976e-9	1.0548592161145192	0.053	0.025	1.0090214572219596e-4	Seq_e1.Crh-Scgn
Reps1	4.2991717051923156e-9	0.7187981105607052	0.238	0.18	1.0784042305304404e-4	Seq_e1.Crh-Scgn
Tnrc6c	4.525888772735572e-9	0.3959068967262178	0.529	0.493	1.1352739397529909e-4	Seq_e1.Crh-Scgn
Casc4	4.6943405773222594e-9	0.45844731682337736	0.548	0.521	1.1775283904155156e-4	Seq_e1.Crh-Scgn
Gm42769	4.840390880395516e-9	1.1289489544999345	0.038	0.016	1.2141636484384112e-4	Seq_e1.Crh-Scgn
Rbks	4.917378984115381e-9	0.9885366241584357	0.136	0.09	1.2334753443755023e-4	Seq_e1.Crh-Scgn
Mapkapk2	5.076712085830983e-9	1.1030052216436546	0.074	0.041	1.2734424596098437e-4	Seq_e1.Crh-Scgn
9630050E16Rik	5.29931853291853e-9	2.4516230760816526	0.012	0.002	1.329281060797284e-4	Seq_e1.Crh-Scgn
Stag1	5.825521387659015e-9	0.37879928721864187	0.498	0.445	1.4612737848803875e-4	Seq_e1.Crh-Scgn
Gm32647	5.858673209437333e-9	0.8293632393931445	0.368	0.314	0.000146959	Seq_e1.Crh-Scgn
Zfp280d	5.8746923604070695e-9	0.46455336040036244	0.437	0.386	1.4736078316845093e-4	Seq_e1.Crh-Scgn
2900027M19Rik	5.925303170380827e-9	1.1816767428898105	0.056	0.028	1.4863030472583267e-4	Seq_e1.Crh-Scgn
Cdkl4	6.04728649422309e-9	1.2074445558640796	0.094	0.056	1.51690134421092e-4	Seq_e1.Crh-Scgn
Scn9a	6.253224569917678e-9	0.38159447250711853	0.531	0.484	1.5685588511181505e-4	Seq_e1.Crh-Scgn
5330417C22Rik	6.278803385320498e-9	0.4958038792134656	0.33	0.27	1.5749750411737936e-4	Seq_e1.Crh-Scgn
Arhgap36	6.451275379975143e-9	1.5073651470230207	0.079	0.045	1.618237916312965e-4	Seq_e1.Crh-Scgn
Mtmr1	6.814261332586568e-9	0.6410465658475861	0.229	0.172	1.7092893126660147e-4	Seq_e1.Crh-Scgn
Camk2g	6.957934091000152e-9	0.5146294234605281	0.437	0.388	1.7453281873864782e-4	Seq_e1.Crh-Scgn
Whrn	7.381722363271091e-9	0.6974364728348452	0.134	0.088	1.8516312376029204e-4	Seq_e1.Crh-Scgn
Mkln1	7.406091337568017e-9	0.5295347054277124	0.412	0.366	1.8577439511155614e-4	Seq_e1.Crh-Scgn
Enpp2	7.497449949917152e-9	0.8624481355663988	0.154	0.106	1.8806603454372186e-4	Seq_e1.Crh-Scgn
Pip4p1	7.626862961905142e-9	1.29712	0.048	0.022	1.9131223053642858e-4	Seq_e1.Crh-Scgn
Wwp1	7.865341082728496e-9	0.6789171998948524	0.345	0.295	1.972942157191616e-4	Seq_e1.Crh-Scgn
Apoe	8.003026758251638e-9	1.3892107480532565	0.036	0.015	2.0074792320398408e-4	Seq_e1.Crh-Scgn
Gm11817	8.205852818356023e-9	1.0004363560749803	0.111	0.069	2.0583561209564248e-4	Seq_e1.Crh-Scgn
Gm5165	8.591992708000313e-9	1.7680630692493446	0.018	0.005	2.1552154508747986e-4	Seq_e1.Crh-Scgn
Gm43343	8.711442706391213e-9	2.515336236377787	0.015	0.004	2.1851782884711718e-4	Seq_e1.Crh-Scgn
Atp1a2	8.719644121736439e-9	2.3338217633580203	0.021	0.007	2.1872355314963684e-4	Seq_e1.Crh-Scgn
Bmp4	8.7796164218333e-9	2.5575059146614496	0.012	0.002	2.202278983252665e-4	Seq_e1.Crh-Scgn
Mbd5	1.028559956164859e-8	0.40548344624525834	0.516	0.488	2.5800397940439323e-4	Seq_e1.Crh-Scgn
Nhs	1.0311403100204264e-8	0.576491	0.298	0.239	2.5865123536552377e-4	Seq_e1.Crh-Scgn
Plk2	1.0813283208466584e-8	1.1015447882778047	0.158	0.112	2.7124039600117576e-4	Seq_e1.Crh-Scgn
Hid1	1.1061658446659283e-8	0.7605114637684074	0.274	0.22	2.774706404760015e-4	Seq_e1.Crh-Scgn
Irf7	1.1350377068620459e-8	2.3816620981910113	0.017	0.005	2.847128583892756e-4	Seq_e1.Crh-Scgn
Exoc6b	1.1965193350066703e-8	0.6175551860156391	0.404	0.364	3.001349099930732e-4	Seq_e1.Crh-Scgn
Gm42853	1.2872384644431306e-8	2.158191172502022	0.016	0.004	3.2289089642091487e-4	Seq_e1.Crh-Scgn
4933400F21Rik	1.345431504960124e-8	0.9475573113176061	0.063	0.033	3.374880387041975e-4	Seq_e1.Crh-Scgn
Tet2	1.3470553977592685e-8	0.5759147819180147	0.294	0.237	3.3789537597393493e-4	Seq_e1.Crh-Scgn
Ccdc141	1.3594751500241254e-8	1.5262318445892191	0.06	0.031	3.4101074663205164e-4	Seq_e1.Crh-Scgn
Gm37965	1.4144269341887148e-8	1.9443971431312157	0.024	0.008	3.547948521718972e-4	Seq_e1.Crh-Scgn
Rsf1	1.463073728337401e-8	0.47227892623901113	0.504	0.464	3.6699741401615365e-4	Seq_e1.Crh-Scgn
Cpe	1.5380474691091106e-8	0.4229680954487294	0.599	0.563	3.858038271513293e-4	Seq_e1.Crh-Scgn
Eif4e3	1.5942172391834923e-8	0.9253566710760215	0.138	0.093	3.998934522767872e-4	Seq_e1.Crh-Scgn
P4hb	1.6206971633597633e-8	1.0599699551609107	0.243	0.2	4.0653567645716304e-4	Seq_e1.Crh-Scgn
Gm28750	1.6317801473616038e-8	0.9157651956611392	0.111	0.069	4.093157321641847e-4	Seq_e1.Crh-Scgn
Samd14	1.6417318689890736e-8	0.898541	0.174	0.126	4.118120220172192e-4	Seq_e1.Crh-Scgn
Macroh2a1	1.691165219291517e-8	1.178475894984928	0.045	0.021	4.242118836070841e-4	Seq_e1.Crh-Scgn
Dennd5b	1.7003599957699396e-8	0.5160293050850209	0.458	0.419	4.2651830133893164e-4	Seq_e1.Crh-Scgn
Gm42770	1.7187230763253244e-8	0.7900984299117022	0.046	0.022	4.3112449646544434e-4	Seq_e1.Crh-Scgn
Phf14	1.7404424281338577e-8	0.4614709810837412	0.498	0.462	4.3657257867309683e-4	Seq_e1.Crh-Scgn
Lrrc8b	1.8209256456448684e-8	0.9529428508886844	0.115	0.074	4.567609889535588e-4	Seq_e1.Crh-Scgn
Dop1a	1.8535686385362438e-8	0.8659793301105845	0.084	0.049	4.6494915729043137e-4	Seq_e1.Crh-Scgn
Frmd4a	1.8554137492877463e-8	0.34159148164392095	0.62	0.59	4.654119848713383e-4	Seq_e1.Crh-Scgn
[truncated: 22,338 more rows]

## Sheet: Table 4
sc/snRNA-seq: GABAergic neuron marker genes
[truncated: 10,126 more rows]

## Sheet: Table 5
sc/snRNA-seq: PVH-assigned HypoMap data marker genes
[truncated: 17,419 more rows]

[truncated: 25 more sheets: Sheet6, Table 7, Table 8, Table 9, Table 10, Table 11, Table 12, Table 13, Table 14, Table 15, Table 16, Table 17, Table 18, Table 19, Table 20, Table 21, Table 22, Table 23, Table 24, Table 25 …]
